# Supplementary material for: Human Milk Protein-Derived Bioactive Peptides from In Vitro-Digested Colostrum Exert Antimicrobial Activities against Common Neonatal Pathogens
Source: Preprints.org preprint supplement (doi:10.20944/preprints202405.1837.v1), 2024-05-28
Supplement: Supplementary file 1 [file supplementary]

## Sheet: S.Table1
Supplementary Table 1. List of the peptides identified from the undigested human milk samples
Annotated Sequence	Peptide sequence	Modifications	Master Protein Accessions	Positions in Proteins	Theo. MH+ [Da]	Retention time [min]	Average of abundances	Standard error
[K].VKHEDQQQGEDEHQDKIYPSFQPQP.[L]	VKHEDQQQGEDEHQDKIYPSFQPQP		P05814	P05814 [39-63]	3007.38	16.93	1.2263e+08	8.47817e+07
[E].LLLNPTHQIYPVTQPLAPVHNPISV.[-]	LLLNPTHQIYPVTQPLAPVHNPISV		P05814	P05814 [202-226]	2761.54	48.33	1.2116e+08	1.18822e+08
[P].LAQPAVVLPVPQPEIMEVPK.[A]	LAQPAVVLPVPQPEIMEVPK		P05814	P05814 [84-103]	2155.22	49.36	1.20041e+08	1.1681e+08
[P].LAQPAVVLPVPQPEIMEVPKAKDTVYT.[K]	LAQPAVVLPVPQPEIMEVPKAKDTVYT		P05814	P05814 [84-110]	2933.61	40.57	1.02095e+08	9.03176e+07
[L].LLNPTHQIYPVTQPLAPVHNPISV.[-]	LLNPTHQIYPVTQPLAPVHNPISV		P05814	P05814 [203-226]	2648.46	39.71	6.70006e+07	4.44566e+07
[V].LPIPQQVVPYP.[Q]	LPIPQQVVPYP		P05814	P05814 [177-187]	1250.71	47.72	6.55326e+07	5.56236e+07
[K].VLPIPQQVVPYPQ.[R]	VLPIPQQVVPYPQ		P05814	P05814 [176-188]	1477.84	47.63	5.92887e+07	5.79465e+07
[P].LLQPLMQQVPQPIPQT.[L]	LLQPLMQQVPQPIPQT		P05814	P05814 [145-160]	1831.01	40.08	5.83678e+07	5.33055e+07
[V].LPIPQQVVP.[Y]	LPIPQQVVP		P05814	P05814 [177-185]	990.598	34.22	5.29594e+07	4.74052e+07
[K].VLPIPQQVVPYPQR.[A]	VLPIPQQVVPYPQR		P05814	P05814 [176-189]	1633.94	35.02	4.76922e+07	4.70467e+07
[L].NPTHQIYPVTQPLAPVHNPISV.[-]	NPTHQIYPVTQPLAPVHNPISV		P05814	P05814 [205-226]	2422.29	36.64	4.48274e+07	4.00957e+07
[L].QPLMQQVPQPIPQT.[L]	QPLMQQVPQPIPQT		P05814	P05814 [147-160]	1604.85	37.3	4.37685e+07	4.0458e+07
[P].LAQPAVVLPVPQPEIMEVPKA.[K]	LAQPAVVLPVPQPEIMEVPKA		P05814	P05814 [84-104]	2226.26	49.4	3.68138e+07	3.53139e+07
[A].QPAVVLPVPQPEIMEVPK.[A]	QPAVVLPVPQPEIMEVPK		P05814	P05814 [86-103]	1971.1	48.71	3.40489e+07	2.20828e+07
[K].VLPIPQQVVPYPQRAVPVQA.[L]	VLPIPQQVVPYPQRAVPVQA		P05814	P05814 [176-195]	2199.26	47.51	2.78839e+07	1.83506e+07
[M].NENSHVQVPFQQ.[L]	NENSHVQVPFQQ		P47710	P47710 [127-138]	1426.67	17.69	2.6207e+07	2.55833e+07
[P].LAQPAVVLPVPQPEIMEVPKAKDTVYTK.[G]	LAQPAVVLPVPQPEIMEVPKAKDTVYTK		P05814	P05814 [84-111]	3061.7	39.6	2.60897e+07	2.40863e+07
[A].VVLPVPQPEIMEVPKAKDTVYT.[K]	VVLPVPQPEIMEVPKAKDTVYT		P05814	P05814 [89-110]	2453.34	39.65	2.46897e+07	1.25684e+07
[T].DLENLHLPLP.[L]	DLENLHLPLP		P05814	P05814 [135-144]	1160.63	41.68	2.40763e+07	1.88911e+07
[L].APVHNPISV.[-]	APVHNPISV		P05814	P05814 [218-226]	933.515	25.13	2.3925e+07	8.56482e+06
[L].AQPAVVLPVPQPEIMEVPK.[A]	AQPAVVLPVPQPEIMEVPK		P05814	P05814 [85-103]	2042.14	48.65	2.34087e+07	1.8654e+07
[L].NQELLLNPTHQIYPVTQPLAPVHNPISV.[-]	NQELLLNPTHQIYPVTQPLAPVHNPISV		P05814	P05814 [199-226]	3132.68	40.75	2.13216e+07	1.02474e+07
[L].AQPAVVLPVPQPEIMEVPKAKDTVYT.[K]	AQPAVVLPVPQPEIMEVPKAKDTVYT		P05814	P05814 [85-110]	2820.52	40.14	2.0887e+07	1.04094e+07
[K].SPTIPFFDPQIPK.[L]	SPTIPFFDPQIPK		P05814	P05814 [120-132]	1486.79	48.99	1.94537e+07	1.23542e+07
[P].LWSVPQPKVLPIPQQVVPYPQR.[A]	LWSVPQPKVLPIPQQVVPYPQR		P05814	P05814 [168-189]	2569.47	40.76	1.92447e+07	1.91336e+07
[L].LNQELLLNPTHQIYPVTQPLAPVHNPISV.[-]	LNQELLLNPTHQIYPVTQPLAPVHNPISV		P05814	P05814 [198-226]	3245.77	41.11	1.88639e+07	1.30128e+07
[P].LWSVPQPKVLPIPQQVVPYPQ.[R]	LWSVPQPKVLPIPQQVVPYPQ		P05814	P05814 [168-188]	2413.36	41.81	1.69511e+07	1.66208e+07
[P].LAQPAVVLPVPQPEIMEVPK.[A]	LAQPAVVLPVPQPEIMEVPK	1xOxidation [M16]	P05814	P05814 [84-103]	2171.21	47.74	1.45489e+07	1.35457e+07
[N].ENSHVQVPFQQ.[L]	ENSHVQVPFQQ		P47710	P47710 [128-138]	1312.63	25.71	1.38903e+07	1.37327e+07
[R].DVSLAKADAAPDEKVLDSGF.[R]	DVSLAKADAAPDEKVLDSGF		P01833	P01833 [572-591]	2048.02	32.69	1.30579e+07	1.12706e+07
[K].VLPIPQQVVPYP.[Q]	VLPIPQQVVPYP		P05814	P05814 [176-187]	1349.78	48.54	1.30562e+07	1.04683e+07
[R].LQNPSESSEPIPLESREEYMNGMN.[R]	LQNPSESSEPIPLESREEYMNGMN	2xPhospho [S8; S]	P47710	P47710 [27-50]	2911.16	44.53	1.24214e+07	9.84114e+06
[L].LLNQELLLNPTHQIYPVTQPLAPVHNPISV.[-]	LLNQELLLNPTHQIYPVTQPLAPVHNPISV		P05814	P05814 [197-226]	3358.85	49.71	1.23868e+07	8.55459e+06
[P].LAQPAVVLPVPQPEIMEVPKAK.[D]	LAQPAVVLPVPQPEIMEVPKAK		P05814	P05814 [84-105]	2354.35	40.15	1.23325e+07	1.18242e+07
[K].SPTIPFFDPQIPKLTDLEN.[L]	SPTIPFFDPQIPKLTDLEN		P05814	P05814 [120-138]	2172.12	42.89	1.22244e+07	1.00634e+07
[A].NPAVVRPHAQIP.[Q]	NPAVVRPHAQIP		P07498	P07498 [83-94]	1298.73	15.25	1.15978e+07	1.13895e+07
[P].LAQPAVVLPVPQPEIMEVPKAKDTVYT.[K]	LAQPAVVLPVPQPEIMEVPKAKDTVYT	1xOxidation [M16]	P05814	P05814 [84-110]	2949.6	39.34	1.14104e+07	8.60155e+06
[P].LAQPAVVLPVPQPEIMEVPKAKDTVYTKG.[R]	LAQPAVVLPVPQPEIMEVPKAKDTVYTKG		P05814	P05814 [84-112]	3118.72	39.64	1.08527e+07	9.06725e+06
[L].LNPTHQIYPVTQPLAPVHNPISV.[-]	LNPTHQIYPVTQPLAPVHNPISV		P05814	P05814 [204-226]	2535.37	38.69	1.06719e+07	8.75099e+06
[K].SPTIPFFDPQIP.[K]	SPTIPFFDPQIP		P05814	P05814 [120-131]	1358.7	43.22	1.03643e+07	5.33661e+06
[V].LPVPQPEIMEVPK.[A]	LPVPQPEIMEVPK		P05814	P05814 [91-103]	1476.81	34.84	1.01644e+07	5.58914e+06
[K].VEKVKHEDQQQGEDEHQDKIYPSFQPQP.[L]	VEKVKHEDQQQGEDEHQDKIYPSFQPQP		P05814	P05814 [36-63]	3363.59	24.28	9.94984e+06	6.53347e+06
[K].AIQDPRLFAEEKAVADTRDQADGS.[R]	AIQDPRLFAEEKAVADTRDQADGS		P01833	P01833 [598-621]	2603.27	23.09	9.85458e+06	4.93888e+06
[A].VVLPVPQPEIMEVPKAKDTVY.[T]	VVLPVPQPEIMEVPKAKDTVY		P05814	P05814 [89-109]	2352.29	39.92	8.58148e+06	5.58993e+06
[I].YPFVEPIPYGFLPQN.[I]	YPFVEPIPYGFLPQN		P05814	P05814 [66-80]	1780.89	43.37	8.41443e+06	8.28909e+06
[V].LPIPQQVVPYPQRAVPVQA.[L]	LPIPQQVVPYPQRAVPVQA		P05814	P05814 [177-195]	2100.2	38.24	7.88725e+06	6.03455e+06
[V].TQPLAPVHNPISV.[-]	TQPLAPVHNPISV		P05814	P05814 [214-226]	1372.76	27.66	7.80379e+06	3.51101e+06
[V].LPIPQQVVPYPQ.[R]	LPIPQQVVPYPQ		P05814	P05814 [177-188]	1378.77	37.33	7.64758e+06	6.72661e+06
[P].LAQPAVVLPVPQPEI.[M]	LAQPAVVLPVPQPEI		P05814	P05814 [84-98]	1570.92	49.41	7.4512e+06	7.31701e+06
[L].LQPLMQQVPQPIPQT.[L]	LQPLMQQVPQPIPQT		P05814	P05814 [146-160]	1717.93	44.36	7.44519e+06	6.93753e+06
[F].DPQIPKLTDLEN.[L]	DPQIPKLTDLEN		P05814	P05814 [127-138]	1382.72	39.2	7.20114e+06	6.52232e+06
[R].NILREKQTDEIKDT.[R]	NILREKQTDEIKDT		P47710	P47710 [54-67]	1702.9	12.49	7.06574e+06	4.53186e+06
[V].LPIPQQVVPYPQR.[A]	LPIPQQVVPYPQR		P05814	P05814 [177-189]	1534.87	30.59	7.0347e+06	6.86918e+06
[R].DVSLAKADAAPDEKVLDSGFR.[E]	DVSLAKADAAPDEKVLDSGFR		P01833	P01833 [572-592]	2204.12	34.24	6.80472e+06	5.91054e+06
[L].AQPAVVLPVPQPEIMEVPKA.[K]	AQPAVVLPVPQPEIMEVPKA		P05814	P05814 [85-104]	2113.17	40.95	6.66093e+06	5.14281e+06
[R].LQNPSESSEPIPLESREEYMNGMN.[R]	LQNPSESSEPIPLESREEYMNGMN	1xPhospho [S]	P47710	P47710 [27-50]	2831.19	33.4	6.5738e+06	4.35743e+06
[V].LPVPQPEIMEVPKAKDTVYT.[K]	LPVPQPEIMEVPKAKDTVYT		P05814	P05814 [91-110]	2255.2	42.96	6.31896e+06	4.22529e+06
[A].DAAPDEKVLDSGF.[R]	DAAPDEKVLDSGF		P01833	P01833 [579-591]	1363.64	34.64	6.09964e+06	4.87056e+06
[A].VVLPVPQPEIMEVPKAKDTVYT.[K]	VVLPVPQPEIMEVPKAKDTVYT	1xOxidation [M11]	P05814	P05814 [89-110]	2469.33	42.6	6.09624e+06	2.81933e+06
[R].TYYANPAVVRPHAQIPQR.[Q]	TYYANPAVVRPHAQIPQR		P07498	P07498 [79-96]	2081.1	16.36	6.02476e+06	5.96831e+06
[Q].DPRLFAEEK.[A]	DPRLFAEEK		P01833	P01833 [601-609]	1104.57	23.25	6.02044e+06	4.61617e+06
[V].MPVLKSPTIP.[F]	MPVLKSPTIP		P05814	P05814 [115-124]	1082.63	29.39	5.78199e+06	4.50299e+06
[P].LAQPAVVLPVPQPEIMEVPKA.[K]	LAQPAVVLPVPQPEIMEVPKA	1xOxidation [M16]	P05814	P05814 [84-104]	2242.25	48.09	5.66522e+06	5.23973e+06
[A].VVLPVPQPEIMEVPKAKDTVYTKG.[R]	VVLPVPQPEIMEVPKAKDTVYTKG		P05814	P05814 [89-112]	2638.45	37.3	5.65237e+06	3.95384e+06
[V].VLPVPQPEIMEVPKAKDTVYT.[K]	VLPVPQPEIMEVPKAKDTVYT		P05814	P05814 [90-110]	2354.27	45.8	5.62234e+06	4.27269e+06
[S].VPQPKVLPIPQQVVPYP.[Q]	VPQPKVLPIPQQVVPYP		P05814	P05814 [171-187]	1899.11	40.16	5.54895e+06	3.631e+06
[P].LWSVPQPKVLPIPQQVVPYP.[Q]	LWSVPQPKVLPIPQQVVPYP		P05814	P05814 [168-187]	2285.31	42.29	5.24606e+06	4.91339e+06
[G].EDEHQDKIYPSFQPQP.[L]	EDEHQDKIYPSFQPQP		P05814	P05814 [48-63]	1957.89	28.55	5.14715e+06	2.03401e+06
[K].AVADTRDQADGSRASVDSGSSEEQGGSS.[R]	AVADTRDQADGSRASVDSGSSEEQGGSS		P01833	P01833 [610-637]	2726.17	12.93	4.99499e+06	990958
[A].QPAVVLPVPQPEIMEVPK.[A]	QPAVVLPVPQPEIMEVPK	1xOxidation [M14]	P05814	P05814 [86-103]	1987.09	46.7	4.97546e+06	3.0093e+06
[R].TYYANPAVVRPHAQIPQ.[R]	TYYANPAVVRPHAQIPQ		P07498	P07498 [79-95]	1925	19.34	4.87423e+06	4.84106e+06
[P].LLQPLMQQVPQPIPQT.[L]	LLQPLMQQVPQPIPQT	1xOxidation [M6]	P05814	P05814 [145-160]	1847.01	43.16	4.76132e+06	3.77412e+06
[Q].PLMQQVPQPIPQT.[L]	PLMQQVPQPIPQT		P05814	P05814 [148-160]	1476.79	36.71	4.67017e+06	4.50986e+06
[V].LPVPQPEIMEVP.[K]	LPVPQPEIMEVP		P05814	P05814 [91-102]	1348.72	48.66	4.66215e+06	3.41075e+06
[R].MNENSHVQVPFQQ.[L]	MNENSHVQVPFQQ		P47710	P47710 [126-138]	1557.71	20.1	4.61077e+06	4.47859e+06
[R].DVSLAKADAAPDEKVLDSGFREIEN.[K]	DVSLAKADAAPDEKVLDSGFREIEN		P01833	P01833 [572-596]	2689.33	34.72	4.59467e+06	1.99716e+06
[A].VVLPVPQPEIMEVPKAKDTVY.[T]	VVLPVPQPEIMEVPKAKDTVY	1xOxidation [M11]	P05814	P05814 [89-109]	2368.28	44.25	4.4992e+06	3.06709e+06
[A].QPAVVLPVPQPEI.[M]	QPAVVLPVPQPEI		P05814	P05814 [86-98]	1386.8	40.9	4.43591e+06	3.50776e+06
[V].LPIPQQ.[V]	LPIPQQ		P05814	P05814 [177-182]	695.409	15.96	4.4198e+06	3.60231e+06
[K].LTDLENLHLPLP.[L]	LTDLENLHLPLP		P05814	P05814 [133-144]	1374.76	42.15	4.4173e+06	3.45363e+06
[P].LAQPAVVLPVPQPEIME.[V]	LAQPAVVLPVPQPEIME		P05814	P05814 [84-100]	1831	41.92	4.34372e+06	4.232e+06
[L].PQNILPL.[A]	PQNILPL		P05814	P05814 [78-84]	794.477	39.46	4.33329e+06	3.83887e+06
[L].FAEEKAVADTRDQADGS.[R]	FAEEKAVADTRDQADGS		P01833	P01833 [605-621]	1809.82	12.27	4.32838e+06	2.253e+06
[V].LPVPQPEIMEVPKAKDT.[V]	LPVPQPEIMEVPKAKDT		P05814	P05814 [91-107]	1892.02	36.98	4.30232e+06	3.14526e+06
[Q].NPSESSEPIP.[L]	NPSESSEPIP		P47710	P47710 [29-38]	1056.48	23.48	4.24787e+06	2.47096e+06
[P].LAQPAVVLPVPQPEIMEVPKAKDTVYTK.[G]	LAQPAVVLPVPQPEIMEVPKAKDTVYTK	1xOxidation [M16]	P05814	P05814 [84-111]	3077.7	36.61	4.2165e+06	4.00793e+06
[K].HEDQQQGEDEHQDKIYPSFQPQP.[L]	HEDQQQGEDEHQDKIYPSFQPQP		P05814	P05814 [41-63]	2780.22	18.43	4.19036e+06	2.30866e+06
[P].EIMEVPKAKDTVYT.[K]	EIMEVPKAKDTVYT		P05814	P05814 [97-110]	1623.83	26.35	4.17367e+06	2.10105e+06
[F].DPQIPKLTDLENLHLP.[L]	DPQIPKLTDLENLHLP		P05814	P05814 [127-142]	1843	41.92	4.02224e+06	2.80661e+06
[R].LQNPSESSEPIPLESREEYMNGMN.[R]	LQNPSESSEPIPLESREEYMNGMN	2xPhospho [S8; S15]; 1xOxidation [M]	P47710	P47710 [27-50]	2927.15	29.62	3.97519e+06	2.78164e+06
[T].DLENLHLP.[L]	DLENLHLP		P05814	P05814 [135-142]	950.494	42.65	3.9625e+06	2.40612e+06
[V].LPVPQPEIMEVPKAKDTVYT.[K]	LPVPQPEIMEVPKAKDTVYT	1xOxidation [M9]	P05814	P05814 [91-110]	2271.19	27.14	3.96156e+06	2.52624e+06
[L].QPLMQQVPQPIPQT.[L]	QPLMQQVPQPIPQT	1xOxidation [M4]	P05814	P05814 [147-160]	1620.84	29.51	3.92223e+06	2.96811e+06
[M].QQVPQPIPQT.[L]	QQVPQPIPQT		P05814	P05814 [151-160]	1135.61	24.54	3.87843e+06	3.28503e+06
[R].DVSLAKADAAPDEK.[V]	DVSLAKADAAPDEK		P01833	P01833 [572-585]	1429.72	12.72	3.84264e+06	3.07645e+06
[Q].ELLLNPTHQIYPVTQPLAPVHNPISV.[-]	ELLLNPTHQIYPVTQPLAPVHNPISV		P05814	P05814 [201-226]	2890.58	40.93	3.71647e+06	1.73231e+06
[L].AQPAVVLPVPQPEI.[M]	AQPAVVLPVPQPEI		P05814	P05814 [85-98]	1457.84	40.91	3.65722e+06	3.44476e+06
[R].RMNENSHVQVPFQQ.[L]	RMNENSHVQVPFQQ		P47710	P47710 [125-138]	1713.81	17.06	3.63758e+06	3.5991e+06
[I].YPVTQPLAPVHNPISV.[-]	YPVTQPLAPVHNPISV		P05814	P05814 [211-226]	1731.94	36.62	3.6179e+06	2.62462e+06
[E].DEHQDKIYPSFQPQP.[L]	DEHQDKIYPSFQPQP		P05814	P05814 [49-63]	1828.85	29	3.60123e+06	2.61544e+06
[K].AIQDPRLFAEEK.[A]	AIQDPRLFAEEK		P01833	P01833 [598-609]	1416.75	19.33	3.50157e+06	2.90568e+06
[L].NQELLLNPTHQIYPVTQPL.[A]	NQELLLNPTHQIYPVTQPL		P05814	P05814 [199-217]	2218.19	40.44	3.42833e+06	2.01644e+06
[V].LPVPQPEIMEVPK.[A]	LPVPQPEIMEVPK	1xOxidation [M9]	P05814	P05814 [91-103]	1492.81	33.17	3.4147e+06	1.43678e+06
[K].AVADTRDQADGSRASVDSGSSEEQGGSSRA.[L]	AVADTRDQADGSRASVDSGSSEEQGGSSRA		P01833	P01833 [610-639]	2953.31	12.92	3.36087e+06	529765
[L].AQPAVVLPVPQPEIMEVPKAKDTVYT.[K]	AQPAVVLPVPQPEIMEVPKAKDTVYT	1xOxidation [M15]	P05814	P05814 [85-110]	2836.52	38.37	3.29865e+06	1.01209e+06
[R].VMPVLKSPTIPFFDPQIPK.[L]	VMPVLKSPTIPFFDPQIPK		P05814	P05814 [114-132]	2154.2	41.97	3.2421e+06	2.73983e+06
[L].NPTHQIYPVTQPLAPVHNPIS.[V]	NPTHQIYPVTQPLAPVHNPIS		P05814	P05814 [205-225]	2323.22	30.25	3.20939e+06	2.64713e+06
[A].QPAVVLPVPQPEIMEVPKAKDTVYT.[K]	QPAVVLPVPQPEIMEVPKAKDTVYT		P05814	P05814 [86-110]	2749.48	40.12	3.18814e+06	1.75749e+06
[A].RETIESLSSSEESITEYKQKVEK.[V]	RETIESLSSSEESITEYKQKVEK	2xPhospho [S]	P05814	P05814 [16-38]	2860.29	29.29	3.12944e+06	1.00238e+06
[L].NQELLLNPTHQIYPVTQPLAPVHNPIS.[V]	NQELLLNPTHQIYPVTQPLAPVHNPIS		P05814	P05814 [199-225]	3033.62	40.08	3.08709e+06	1.7318e+06
[K].AIQDPRLFAEEKAVADT.[R]	AIQDPRLFAEEKAVADT		P01833	P01833 [598-614]	1873.97	25.87	3.0834e+06	1.4025e+06
[V].VLPVPQPEIMEVPKAKDTVY.[T]	VLPVPQPEIMEVPKAKDTVY		P05814	P05814 [90-109]	2253.22	38.77	3.07332e+06	2.76922e+06
[L].AQPAVVLPVPQPEIMEVPK.[A]	AQPAVVLPVPQPEIMEVPK	1xOxidation [M15]	P05814	P05814 [85-103]	2058.13	46.76	2.97098e+06	1.99387e+06
[L].LLNPTHQIYPVTQPL.[A]	LLNPTHQIYPVTQPL		P05814	P05814 [203-217]	1733.96	36.15	2.93056e+06	995967
[R].LQNPSESSEPIPLESREEYMNGMN.[R]	LQNPSESSEPIPLESREEYMNGMN	1xPhospho [S]; 1xOxidation [M]	P47710	P47710 [27-50]	2847.18	28.29	2.90034e+06	1.41112e+06
[V].LPVPQPEIMEVPKAKDTVY.[T]	LPVPQPEIMEVPKAKDTVY		P05814	P05814 [91-109]	2154.15	36.26	2.85719e+06	2.66916e+06
[V].LPVPQPEIMEVPKA.[K]	LPVPQPEIMEVPKA		P05814	P05814 [91-104]	1547.85	36.72	2.8463e+06	1.16374e+06
[V].EPIPYGFLPQNILP.[L]	EPIPYGFLPQNILP		P05814	P05814 [70-83]	1597.86	43.96	2.83809e+06	2.09323e+06
[A].VVLPVPQPEIMEVPKA.[K]	VVLPVPQPEIMEVPKA		P05814	P05814 [89-104]	1745.99	40.45	2.78186e+06	1.3773e+06
[R].AVPVQALL.[L]	AVPVQALL		P05814	P05814 [190-197]	810.508	37.89	2.71913e+06	2.70979e+06
[V].LPVPQPEIMEVPKAKDT.[V]	LPVPQPEIMEVPKAKDT	1xOxidation [M9]	P05814	P05814 [91-107]	1908.01	29.51	2.69052e+06	1.52124e+06
[R].LFAEEKAVADTRDQADGS.[R]	LFAEEKAVADTRDQADGS		P01833	P01833 [604-621]	1922.91	23.99	2.68126e+06	1.45556e+06
[R].DVSLAKADAAPDEKVLDSGFREIENK.[A]	DVSLAKADAAPDEKVLDSGFREIENK		P01833	P01833 [572-597]	2817.43	33.57	2.5483e+06	1.31423e+06
[K].TAPYVPMYYVPNSYPYYGTN.[L]	TAPYVPMYYVPNSYPYYGTN		P07498	P07498 [42-61]	2360.06	41.08	2529110	2529110
[A].DAAPDEKVLDSGFR.[E]	DAAPDEKVLDSGFR		P01833	P01833 [579-592]	1519.74	19.87	2.52815e+06	2.12807e+06
[R].TYYANPAVVRPHAQIP.[Q]	TYYANPAVVRPHAQIP		P07498	P07498 [79-94]	1796.94	29.22	2.52497e+06	2.47625e+06
[W].SVPQPKVLPIPQQVVPYP.[Q]	SVPQPKVLPIPQQVVPYP		P05814	P05814 [170-187]	1986.14	40.26	2.51175e+06	1.93191e+06
[P].LWSVPQPKVLPIPQQVVPYPQRAVPVQA.[L]	LWSVPQPKVLPIPQQVVPYPQRAVPVQA		P05814	P05814 [168-195]	3134.79	41.09	2.49453e+06	2.49239e+06
[A].VVLPVPQPEIM.[E]	VVLPVPQPEIM		P05814	P05814 [89-99]	1221.69	49.05	2.48106e+06	1.24582e+06
[V].VLPVPQPEIMEVPKAKDTVYT.[K]	VLPVPQPEIMEVPKAKDTVYT	1xOxidation [M10]	P05814	P05814 [90-110]	2370.26	37.93	2.39391e+06	1.7645e+06
[I].YPFVEPIPY.[G]	YPFVEPIPY		P05814	P05814 [66-74]	1124.57	41.31	2.39176e+06	2.07917e+06
[K].GRVMPVLKSPTIP.[F]	GRVMPVLKSPTIP		P05814	P05814 [112-124]	1394.82	27.24	2.37754e+06	2.0094e+06
[L].QPLMQQVPQPIP.[Q]	QPLMQQVPQPIP		P05814	P05814 [147-158]	1375.74	33.53	2.3496e+06	1.42446e+06
[I].MEVPKAKDTVYT.[K]	MEVPKAKDTVYT		P05814	P05814 [99-110]	1381.7	14.79	2.32726e+06	2.21897e+06
[M].NENSHVQVPFQQLNQ.[L]	NENSHVQVPFQQLNQ		P47710	P47710 [127-141]	1781.86	31.99	2.2885e+06	2.13348e+06
[P].LLQPLMQQVPQPIPQTLALPPQP.[L]	LLQPLMQQVPQPIPQTLALPPQP		P05814	P05814 [145-167]	2547.44	42.36	2.28823e+06	1.47133e+06
[R].RPDIQYPDATDEDITSHMESEELNGAY.[K]	RPDIQYPDATDEDITSHMESEELNGAY	1xPhospho [T/S]	P10451	P10451 [176-202]	3176.3	45.15	2.26815e+06	708140
[K].LPLRYPERLQNPSESSEPIPLESREEYMNGMN.[R]	LPLRYPERLQNPSESSEPIPLESREEYMNGMN	2xPhospho [S16; S23]	P47710	P47710 [19-50]	3935.74	38.85	2.24713e+06	1.79711e+06
[F].DPQIPKLTDLENLHLPLP.[L]	DPQIPKLTDLENLHLPLP		P05814	P05814 [127-144]	2053.13	42.99	2.23657e+06	1.07028e+06
[L].NPTHQIYPVTQPLAPVHNP.[I]	NPTHQIYPVTQPLAPVHNP		P05814	P05814 [205-223]	2123.1	23.27	2.23224e+06	1.87198e+06
[K].VLPIPQQVVPYPQRAVPVQALL.[L]	VLPIPQQVVPYPQRAVPVQALL		P05814	P05814 [176-197]	2425.43	42.35	2.2018e+06	1.68001e+06
[L].FAEEKAVADTRDQADGSRASVDSGSSEEQGGSS.[R]	FAEEKAVADTRDQADGSRASVDSGSSEEQGGSS		P01833	P01833 [605-637]	3330.46	21.4	2.19788e+06	839033
[Y].PVTQPLAPVHNPISV.[-]	PVTQPLAPVHNPISV		P05814	P05814 [212-226]	1568.88	31.26	2.16035e+06	1.3602e+06
[K].ADAAPDEKVLDSGFREIEN.[K]	ADAAPDEKVLDSGFREIEN		P01833	P01833 [578-596]	2075.99	29.54	2.14428e+06	879403
[A].VVLPVPQPEIMEVPK.[A]	VVLPVPQPEIMEVPK		P05814	P05814 [89-103]	1674.95	40.19	2.08228e+06	885533
[P].VPQPEIMEVPKAKDTVYT.[K]	VPQPEIMEVPKAKDTVYT		P05814	P05814 [93-110]	2045.06	25.54	2.07398e+06	1.5605e+06
[E].LLLNPTHQIYPVTQPL.[A]	LLLNPTHQIYPVTQPL		P05814	P05814 [202-217]	1847.04	40.17	2.06256e+06	1.18295e+06
[L].AQPAVVLPVPQPEIMEVPKAKDTVYTKG.[R]	AQPAVVLPVPQPEIMEVPKAKDTVYTKG		P05814	P05814 [85-112]	3005.64	39.07	2.04386e+06	962594
[K].AVADTRDQADGSRASVDSGSSEEQGGSSRALVSTLVP.[L]	AVADTRDQADGSRASVDSGSSEEQGGSSRALVSTLVP		P01833	P01833 [610-646]	3662.75	36.57	2.04006e+06	566502
[L].AQPAVVLPVPQPEIMEVPKAKDTVY.[T]	AQPAVVLPVPQPEIMEVPKAKDTVY		P05814	P05814 [85-109]	2719.47	40.37	2.0361e+06	1.19233e+06
[A].RETIESLSSSEESITEYK.[Q]	RETIESLSSSEESITEYK	2xPhospho [S]	P05814	P05814 [16-33]	2247.93	33.76	1.99528e+06	429523
[L].ESREEYMNGMN.[R]	ESREEYMNGMN	1xPhospho [S2]	P47710	P47710 [40-50]	1439.5	22.79	1.97909e+06	1.18861e+06
[Q].KVEKVKHEDQQQGEDEHQDKIYPSFQPQP.[L]	KVEKVKHEDQQQGEDEHQDKIYPSFQPQP		P05814	P05814 [35-63]	3491.68	23.31	1.95536e+06	1.29254e+06
[V].LPVPQPEIMEVPKAKDTVY.[T]	LPVPQPEIMEVPKAKDTVY	1xOxidation [M9]	P05814	P05814 [91-109]	2170.15	36.04	1.93982e+06	1.81775e+06
[E].DQQQGEDEHQDKIYPSFQPQP.[L]	DQQQGEDEHQDKIYPSFQPQP		P05814	P05814 [43-63]	2514.12	28.86	1.91056e+06	708593
[L].LLNQELLLNPTHQIYPVTQPL.[A]	LLNQELLLNPTHQIYPVTQPL		P05814	P05814 [197-217]	2444.35	49.8	1.9063e+06	1.22092e+06
[E].LLLNPTHQIYPVTQPLAPVHNPIS.[V]	LLLNPTHQIYPVTQPLAPVHNPIS		P05814	P05814 [202-225]	2662.47	39.87	1.90375e+06	1.76467e+06
[L].AQPAVVLPVPQPEIMEVPKAKDTVYTK.[G]	AQPAVVLPVPQPEIMEVPKAKDTVYTK		P05814	P05814 [85-111]	2948.62	38.97	1.84872e+06	1.50232e+06
[L].NPTHQIYPVTQPL.[A]	NPTHQIYPVTQPL		P05814	P05814 [205-217]	1507.79	32.4	1.84294e+06	849256
[A].RETIESLSSSEESITEYKQKVE.[K]	RETIESLSSSEESITEYKQKVE	2xPhospho [S]	P05814	P05814 [16-37]	2732.2	32.83	1.84074e+06	489546
[R].DQADGSRASVDSGSSEEQGGSSRALVSTLVPLG.[L]	DQADGSRASVDSGSSEEQGGSSRALVSTLVPLG		P01833	P01833 [616-648]	3219.54	38.87	1.79737e+06	620157
[P].LWSVPQPKVLPIPQQ.[V]	LWSVPQPKVLPIPQQ		P05814	P05814 [168-182]	1730	40.24	1.78859e+06	1.78011e+06
[F].FDPQIPKLTDLEN.[L]	FDPQIPKLTDLEN		P05814	P05814 [126-138]	1529.78	39.2	1.78326e+06	1.28785e+06
[A].NPAVVRPHAQIPQ.[R]	NPAVVRPHAQIPQ		P07498	P07498 [83-95]	1426.79	13.86	1.77245e+06	1.73467e+06
[R].ETIESLSSSEESITEY.[K]	ETIESLSSSEESITEY		P05814	P05814 [17-32]	1803.8	41.92	1.74625e+06	766671
[L].AQPAVVLPVPQPEIMEVPKAK.[D]	AQPAVVLPVPQPEIMEVPKAK		P05814	P05814 [85-105]	2241.27	39.56	1.74535e+06	1.55403e+06
[E].LLLNPTHQIYPVTQPLAPVHNP.[I]	LLLNPTHQIYPVTQPLAPVHNP		P05814	P05814 [202-223]	2462.36	38.99	1.70315e+06	1.55236e+06
[P].VPQPEIMEVPK.[A]	VPQPEIMEVPK		P05814	P05814 [93-103]	1266.68	30.92	1.69936e+06	983792
[V].VLPVPQPEIMEVPKAKDTVYTKG.[R]	VLPVPQPEIMEVPKAKDTVYTKG		P05814	P05814 [90-112]	2539.38	40.3	1.69109e+06	1.57747e+06
[L].NQELLLNPTHQIYPVTQPLAPVHNP.[I]	NQELLLNPTHQIYPVTQPLAPVHNP		P05814	P05814 [199-223]	2833.5	47.41	1.66568e+06	837029
[P].AVVLPVPQPEIMEVPKAKDTVYT.[K]	AVVLPVPQPEIMEVPKAKDTVYT		P05814	P05814 [88-110]	2524.37	39.72	1.65755e+06	783950
[V].MPVLKSPTIPFFDPQIP.[K]	MPVLKSPTIPFFDPQIP		P05814	P05814 [115-131]	1927.04	43.12	1.6413e+06	1.03449e+06
[L].NQELLLNPTHQIYPV.[T]	NQELLLNPTHQIYPV		P05814	P05814 [199-213]	1778.94	39.43	1.63858e+06	1.34244e+06
[V].EPIPYGFLPQN.[I]	EPIPYGFLPQN		P05814	P05814 [70-80]	1274.64	47.91	1.63177e+06	1.59944e+06
[K].AVADTRDQADGSRASVDSGSSEE.[Q]	AVADTRDQADGSRASVDSGSSEE		P01833	P01833 [610-632]	2310.01	13.16	1.61988e+06	566028
[P].THQIYPVTQPLAPVHNPISV.[-]	THQIYPVTQPLAPVHNPISV		P05814	P05814 [207-226]	2211.19	36.18	1.61413e+06	1.32892e+06
[P].LMQQVPQPIPQT.[L]	LMQQVPQPIPQT		P05814	P05814 [149-160]	1379.74	31.4	1.58101e+06	1.37377e+06
[T].IPFFDPQIP.[K]	IPFFDPQIP		P05814	P05814 [123-131]	1073.57	42.91	1.56251e+06	367061
[L].LLNPTHQIYPVTQPLAPV.[H]	LLNPTHQIYPVTQPLAPV		P05814	P05814 [203-220]	2001.12	39.37	1.56249e+06	1.27733e+06
[R].VMPVLKSPTIPFFDPQIPK.[L]	VMPVLKSPTIPFFDPQIPK	1xOxidation [M2]	P05814	P05814 [114-132]	2170.2	41.19	1.51936e+06	1.00908e+06
[V].DSGSSEEQGGSSRALVSTLVPLG.[L]	DSGSSEEQGGSSRALVSTLVPLG		P01833	P01833 [626-648]	2233.09	40.01	1.50473e+06	573579
[P].EIMEVPKAKDTVYTKG.[R]	EIMEVPKAKDTVYTKG		P05814	P05814 [97-112]	1808.95	15.78	1.48055e+06	812743
[R].LQNPSESSEPIPLESREEYMNGMNR.[Q]	LQNPSESSEPIPLESREEYMNGMNR	1xPhospho [S15]	P47710	P47710 [27-51]	2987.29	29.98	1.44487e+06	372890
[V].EPIPYGFLP.[Q]	EPIPYGFLP		P05814	P05814 [70-78]	1032.54	42.36	1.42589e+06	1.25466e+06
[H].QIYPVTQPL.[A]	QIYPVTQPL		P05814	P05814 [209-217]	1058.59	37.23	1.40279e+06	771079
[R].ASVDSGSSEEQGGSSRALVSTLVPLG.[L]	ASVDSGSSEEQGGSSRALVSTLVPLG		P01833	P01833 [623-648]	2490.23	39.75	1.40246e+06	635225
[A].IPVKQADSGSSEEKQLYNKYPDAVAT.[W]	IPVKQADSGSSEEKQLYNKYPDAVAT	1xPhospho [S]	P10451	P10451 [17-42]	2918.38	19.23	1.39819e+06	511067
[L].PIPQQVVPYPQR.[A]	PIPQQVVPYPQR		P05814	P05814 [178-189]	1421.79	34.99	1.38983e+06	1.36964e+06
[L].MQQVPQPIPQT.[L]	MQQVPQPIPQT		P05814	P05814 [150-160]	1266.65	19.03	1.38421e+06	1.20385e+06
[P].LLQPLMQQVPQPIPQTLALPPQP.[L]	LLQPLMQQVPQPIPQTLALPPQP	1xOxidation [M6]	P05814	P05814 [145-167]	2563.43	41.36	1.38399e+06	637826
[K].VKHEDQQQGEDEHQDKIYPSFQPQ.[P]	VKHEDQQQGEDEHQDKIYPSFQPQ		P05814	P05814 [39-62]	2910.33	15.87	1.34749e+06	959797
[A].VPVQALLLNQE.[L]	VPVQALLLNQE		P05814	P05814 [191-201]	1223.7	38.4	1.34191e+06	1.10463e+06
[L].NQELLLNPTHQIYPVTQPLAPV.[H]	NQELLLNPTHQIYPVTQPLAPV		P05814	P05814 [199-220]	2485.34	41	1.33617e+06	1.08143e+06
[F].DPQIPKLTDLENL.[H]	DPQIPKLTDLENL		P05814	P05814 [127-139]	1495.8	49	1.32842e+06	695674
[K].ADAAPDEKVLDSGF.[R]	ADAAPDEKVLDSGF		P01833	P01833 [578-591]	1434.67	25.86	1.31915e+06	1.00384e+06
[K].DDPDAPLQPVTPLQLFEGRRN.[R]	DDPDAPLQPVTPLQLFEGRRN		P0C0L4	P0C0L5 [1429-1449]	2378.21	49.31	1.30725e+06	637417
[A].LPPQPLWSVPQP.[K]	LPPQPLWSVPQP		P05814	P05814 [163-174]	1358.75	40.71	1.30665e+06	890273
[D].EHQDKIYPSFQPQP.[L]	EHQDKIYPSFQPQP		P05814	P05814 [50-63]	1713.82	27.17	1.30069e+06	720965
[R].LQNPSESSEPIPLESREEYMNGMN.[R]	LQNPSESSEPIPLESREEYMNGMN		P47710	P47710 [27-50]	2751.22	30.67	1.28942e+06	518319
[E].IMEVPKAKDTVYT.[K]	IMEVPKAKDTVYT		P05814	P05814 [98-110]	1494.79	24.61	1.28169e+06	672289
[V].LPVPQPEIMEVP.[K]	LPVPQPEIMEVP	1xOxidation [M9]	P05814	P05814 [91-102]	1364.71	34.57	1.27834e+06	956909
[A].RPKLPLRYPER.[L]	RPKLPLRYPER		P47710	P47710 [16-26]	1424.85	13.95	1.2748e+06	1.24394e+06
[V].KHEDQQQGEDEHQDKIYPSFQPQP.[L]	KHEDQQQGEDEHQDKIYPSFQPQP		P05814	P05814 [40-63]	2908.31	17.15	1.2729e+06	841491
[V].MPVLKSPTIPFFDPQIPK.[L]	MPVLKSPTIPFFDPQIPK		P05814	P05814 [115-132]	2055.13	41.97	1.27243e+06	728685
[K].GRVMPVLKSPTIPFFDPQIPK.[L]	GRVMPVLKSPTIPFFDPQIPK		P05814	P05814 [112-132]	2367.33	40.79	1.27188e+06	1.19231e+06
[R].DQADGSRASVDSGSSEEQGGSSRALVSTLVP.[L]	DQADGSRASVDSGSSEEQGGSSRALVSTLVP		P01833	P01833 [616-646]	3049.43	39.89	1.25353e+06	322025
[L].TDLENLHLPLP.[L]	TDLENLHLPLP		P05814	P05814 [134-144]	1261.68	41.31	1.25113e+06	647548
[R].QRNILREKQTDEIKDT.[R]	QRNILREKQTDEIKDT		P47710	P47710 [52-67]	1987.06	19.48	1.22573e+06	916341
[K].VKHEDQQQGEDEHQDKIYPSFQP.[Q]	VKHEDQQQGEDEHQDKIYPSFQP		P05814	P05814 [39-61]	2782.27	25.22	1.1986e+06	699531
[K].ADAAPDEKVLDSGFREIENK.[A]	ADAAPDEKVLDSGFREIENK		P01833	P01833 [578-597]	2204.08	36.01	1.19552e+06	630796
[N].ILPLAQPAVVLPVPQPEIMEVPK.[A]	ILPLAQPAVVLPVPQPEIMEVPK		P05814	P05814 [81-103]	2478.44	42.76	1.18934e+06	697646
[Q].GEDEHQDKIYPSFQPQP.[L]	GEDEHQDKIYPSFQPQP		P05814	P05814 [47-63]	2014.91	28.15	1.17639e+06	455755
[V].LPVPQPEIMEVPKAKDTV.[Y]	LPVPQPEIMEVPKAKDTV		P05814	P05814 [91-108]	1991.09	33.03	1.17043e+06	1.08375e+06
[H].EDQQQGEDEHQDKIYPSFQPQP.[L]	EDQQQGEDEHQDKIYPSFQPQP		P05814	P05814 [42-63]	2643.16	28.44	1.15202e+06	457215
[P].IPQQVVPYPQRAVPVQA.[L]	IPQQVVPYPQRAVPVQA		P05814	P05814 [179-195]	1890.06	27.13	1.15159e+06	823462
[K].TAPYVPMYYVPNSYPYYGTNLYQ.[R]	TAPYVPMYYVPNSYPYYGTNLYQ		P07498	P07498 [42-64]	2764.26	50	1.14168e+06	875929
[L].AQPAVVLPVPQPEIMEVPKA.[K]	AQPAVVLPVPQPEIMEVPKA	1xOxidation [M15]	P05814	P05814 [85-104]	2129.17	39.29	1.13868e+06	656864
[A].DAAPDEKVLDSGFREIEN.[K]	DAAPDEKVLDSGFREIEN		P01833	P01833 [579-596]	2004.95	30.34	1.12e+06	631713
[P].VPQPEIMEVPKAKDT.[V]	VPQPEIMEVPKAKDT		P05814	P05814 [93-107]	1681.88	27.25	1.11222e+06	750277
[N].PTHQIYPVTQPLAPVHNPISV.[-]	PTHQIYPVTQPLAPVHNPISV		P05814	P05814 [206-226]	2308.24	36.59	1.10286e+06	979209
[R].TYYANPAVVRPHAQ.[I]	TYYANPAVVRPHAQ		P07498	P07498 [79-92]	1586.81	14.61	1.10076e+06	1.07928e+06
[I].YPFVEPIPYGFLPQNILP.[L]	YPFVEPIPYGFLPQNILP		P05814	P05814 [66-83]	2104.12	44.98	1.08549e+06	775889
[A].RETIESLSSSEESITEYKQKVEK.[V]	RETIESLSSSEESITEYKQKVEK	1xPhospho [T/S]	P05814	P05814 [16-38]	2780.32	32.59	1.08184e+06	407865
[V].PQPEIMEVPK.[A]	PQPEIMEVPK		P05814	P05814 [94-103]	1167.61	40.74	1.07973e+06	760455
[P].LAQPAVVLPVPQPEIMEVPKAKDTVY.[T]	LAQPAVVLPVPQPEIMEVPKAKDTVY		P05814	P05814 [84-109]	2832.56	40.81	1.0723e+06	760608
[Q].ELLLNPTHQIYP.[V]	ELLLNPTHQIYP		P05814	P05814 [201-212]	1437.77	45.08	1.06798e+06	629693
[R].AVPVQALLLNQE.[L]	AVPVQALLLNQE		P05814	P05814 [190-201]	1294.74	40.07	1.06715e+06	928933
[P].LAQPAVVLPVPQPE.[I]	LAQPAVVLPVPQPE		P05814	P05814 [84-97]	1457.84	38.88	1.06493e+06	1.02334e+06
[P].LAQPAVVLPVPQP.[E]	LAQPAVVLPVPQP		P05814	P05814 [84-96]	1328.79	47.94	1.06439e+06	970465
[L].AQPAVVLPVPQPEIMEVPKAKDTVY.[T]	AQPAVVLPVPQPEIMEVPKAKDTVY	1xOxidation [M15]	P05814	P05814 [85-109]	2735.47	38.91	1.05491e+06	589383
[E].SREEYMNGMN.[R]	SREEYMNGMN	1xPhospho [S1]	P47710	P47710 [41-50]	1310.45	14.12	1.0538e+06	868249
[R].ETIESLSSSEESITEYK.[Q]	ETIESLSSSEESITEYK		P05814	P05814 [17-33]	1931.9	35.9	1.05248e+06	427673
[A].QPAVVLPVPQPEIMEVP.[K]	QPAVVLPVPQPEIMEVP		P05814	P05814 [86-102]	1843	49.91	1.05001e+06	538317
[A].INNPYVPRTYYANPAVVRPHAQIP.[Q]	INNPYVPRTYYANPAVVRPHAQIP		P07498	P07498 [71-94]	2750.45	30.34	1.04325e+06	1.03062e+06
[K].QKVEKVKHEDQQQGEDEHQDKIYPSFQPQP.[L]	QKVEKVKHEDQQQGEDEHQDKIYPSFQPQP		P05814	P05814 [34-63]	3619.74	23.49	1.03793e+06	634644
[T].IPFFDPQIPKLTDLEN.[L]	IPFFDPQIPKLTDLEN		P05814	P05814 [123-138]	1886.99	42.53	1.03256e+06	709516
[L].AQPAVVLPVPQPEIME.[V]	AQPAVVLPVPQPEIME		P05814	P05814 [85-100]	1717.92	41.3	1.02761e+06	752101
[Q].YVPFPPFSDISNPTAHENYEKNNV.[M]	YVPFPPFSDISNPTAHENYEKNNV		P47710	P47710 [158-181]	2779.3	40.17	1.02704e+06	954468
[K].LPLRYPERLQNPSESSEPIP.[L]	LPLRYPERLQNPSESSEPIP		P47710	P47710 [19-38]	2322.21	29.31	1.02407e+06	347175
[P].EIMEVPKAKDTVYT.[K]	EIMEVPKAKDTVYT	1xOxidation [M3]	P05814	P05814 [97-110]	1639.82	22.58	1.01961e+06	152350
[K].AIQDPRLFAEEKAVADTRDQA.[D]	AIQDPRLFAEEKAVADTRDQA		P01833	P01833 [598-618]	2344.19	31.39	1.01744e+06	426448
[L].NQELLLNPTHQIYP.[V]	NQELLLNPTHQIYP		P05814	P05814 [199-212]	1679.88	36.91	1.01035e+06	554396
[E].RLQNPSESSEPIPLESREEYMNGMN.[R]	RLQNPSESSEPIPLESREEYMNGMN	1xOxidation [M]	P47710	P47710 [26-50]	2923.32	29.77	1.00893e+06	424062
[P].QPEIMEVPKAKDTVYT.[K]	QPEIMEVPKAKDTVYT		P05814	P05814 [95-110]	1848.94	29.22	1.00501e+06	777542
[E].RLQNPSESSEPIPLESREEYMNGMN.[R]	RLQNPSESSEPIPLESREEYMNGMN	1xPhospho [S]; 1xOxidation [M]	P47710	P47710 [26-50]	3003.29	32.9	997336	285308
[Q].TLALPPQP.[L]	TLALPPQP		P05814	P05814 [160-167]	836.488	31.83	995877	573671
[P].VTQPLAPVHNPISV.[-]	VTQPLAPVHNPISV		P05814	P05814 [213-226]	1471.83	29.11	988999	452299
[A].APDEKVLDSGF.[R]	APDEKVLDSGF		P01833	P01833 [581-591]	1177.57	22.39	988663	610233
[R].LQNPSESSEPIPLESREEYMNGMNRQ.[R]	LQNPSESSEPIPLESREEYMNGMNRQ	2xPhospho [S8; S15]	P47710	P47710 [27-52]	3195.32	31.19	976693	694124
[Q].DPRLFAEEKAVADT.[R]	DPRLFAEEKAVADT		P01833	P01833 [601-614]	1561.79	29.08	976267	583123
[A].SVDSGSSEEQGGSSRALVSTLVPLG.[L]	SVDSGSSEEQGGSSRALVSTLVPLG		P01833	P01833 [624-648]	2419.19	39.76	965959	269316
[V].LPVPQPEIMEVPKA.[K]	LPVPQPEIMEVPKA	1xOxidation [M9]	P05814	P05814 [91-104]	1563.85	27.44	963093	376713
[A].RETIESLSSSEESITEYK.[Q]	RETIESLSSSEESITEYK	1xPhospho [S/T]	P05814	P05814 [16-33]	2167.96	35.32	961414	241820
[D].LNAPSDWDSRGKDSYETSQLDDQSAETHSHK.[Q]	LNAPSDWDSRGKDSYETSQLDDQSAETHSHK	3xPhospho [S9; S14; S18]	P10451	P10451 [211-241]	3744.45	17.68	956313	845248
[R].ETIESLSSSEESITEYKQKVE.[K]	ETIESLSSSEESITEYKQKVE		P05814	P05814 [17-37]	2416.16	36.01	946715	491896
[A].LLLNQELLLNPTHQIYPVTQPLAPVHNPISV.[-]	LLLNQELLLNPTHQIYPVTQPLAPVHNPISV		P05814	P05814 [196-226]	3471.94	42.38	938722	845759
[R].ALVSTLVPLG.[L]	ALVSTLVPLG		P01833	P01833 [639-648]	969.598	40.87	937197	859938
[L].LLNPTHQIYP.[V]	LLNPTHQIYP		P05814	P05814 [203-212]	1195.65	23.44	934675	235622
[K].VKHEDQQQGEDEHQDKIYPSFQ.[P]	VKHEDQQQGEDEHQDKIYPSFQ		P05814	P05814 [39-60]	2685.22	23.22	925849	777466
[K].VLPIPQQVVPYPQRAVPVQAL.[L]	VLPIPQQVVPYPQRAVPVQAL		P05814	P05814 [176-196]	2312.35	40.91	922389	474533
[L].LLNPTHQIYPVTQPLAPVHNPIS.[V]	LLNPTHQIYPVTQPLAPVHNPIS		P05814	P05814 [203-225]	2549.39	38.15	920377	653474
[T].APYVPMYYVPNSYPYYGTN.[L]	APYVPMYYVPNSYPYYGTN		P07498	P07498 [43-61]	2259.01	40.93	918789	873470
[R].RPDIQYPDATDEDITSHMESEELNGAY.[K]	RPDIQYPDATDEDITSHMESEELNGAY		P10451	P10451 [176-202]	3096.34	34.96	917275	266306
[A].VVLPVPQPEIMEVPKAKDTVYTKG.[R]	VVLPVPQPEIMEVPKAKDTVYTKG	1xOxidation [M11]	P05814	P05814 [89-112]	2654.45	37.73	902054	310300
[A].VVLPVPQPEIMEVPKAKDT.[V]	VVLPVPQPEIMEVPKAKDT		P05814	P05814 [89-107]	2090.16	46.33	899773	490926
[L].LQPLMQQVPQPIPQT.[L]	LQPLMQQVPQPIPQT	1xOxidation [M5]	P05814	P05814 [146-160]	1733.93	27.78	897948	682031
[K].AIQDPRLFAEEKAVADTRDQADGSR.[A]	AIQDPRLFAEEKAVADTRDQADGSR		P01833	P01833 [598-622]	2759.37	29.1	897684	503211
[P].VPQPEIMEVPKAKDTVYT.[K]	VPQPEIMEVPKAKDTVYT	1xOxidation [M7]	P05814	P05814 [93-110]	2061.06	25.65	895963	509296
[K].VLPIPQQVVP.[Y]	VLPIPQQVVP		P05814	P05814 [176-185]	1089.67	46.89	891301	354563
[A].RETIESLSSSEESITEYKQKVE.[K]	RETIESLSSSEESITEYKQKVE	1xPhospho [S/T]	P05814	P05814 [16-37]	2652.23	35.93	891047	385280
[Q].IPKLTDLENLHLP.[L]	IPKLTDLENLHLP		P05814	P05814 [130-142]	1502.86	41.18	884285	752472
[L].LLNQELLLNPTHQIYPV.[T]	LLNQELLLNPTHQIYPV		P05814	P05814 [197-213]	2005.11	41.38	881135	841917
[L].LNQELLLNPTHQIYPVTQPL.[A]	LNQELLLNPTHQIYPVTQPL		P05814	P05814 [198-217]	2331.27	48.95	875613	327652
[R].DVSLAKADAAPDEKVLDSGFREIENKAIQDPR.[L]	DVSLAKADAAPDEKVLDSGFREIENKAIQDPR		P01833	P01833 [572-603]	3497.79	38.35	875161	307518
[L].FAEEKAVADTRDQA.[D]	FAEEKAVADTRDQA		P01833	P01833 [605-618]	1550.74	12.23	862736	387047
[K].AVADTRDQADGSRASVDSGSSEEQGGSSRALVST.[L]	AVADTRDQADGSRASVDSGSSEEQGGSSRALVST		P01833	P01833 [610-643]	3353.54	21.5	854855	215161
[L].FAEEKAVADTRDQADGSRASVDSGSSEEQGGSSRA.[L]	FAEEKAVADTRDQADGSRASVDSGSSEEQGGSSRA		P01833	P01833 [605-639]	3557.6	13	854098	152706
[A].LVSTLVPLG.[L]	LVSTLVPLG		P01833	P01833 [640-648]	898.561	46.33	853705	728506
[E].RLQNPSESSEPIPLESREEYMNGMN.[R]	RLQNPSESSEPIPLESREEYMNGMN		P47710	P47710 [26-50]	2907.32	27.11	850405	355245
[R].VMPVLKSPTIPFFDPQIPKLTDLEN.[L]	VMPVLKSPTIPFFDPQIPKLTDLEN		P05814	P05814 [114-138]	2839.53	42.97	849594	724669
[A].VVLPVPQPEIMEVPKAKDTVYTK.[G]	VVLPVPQPEIMEVPKAKDTVYTK		P05814	P05814 [89-111]	2581.43	37.35	844613	434067
[P].VPQPEIMEVPKAKDTV.[Y]	VPQPEIMEVPKAKDTV	1xOxidation [M7]	P05814	P05814 [93-108]	1796.95	30.93	838542	566440
[Q].ELLLNPTHQIYPVTQPL.[A]	ELLLNPTHQIYPVTQPL		P05814	P05814 [201-217]	1976.09	48.62	838215	305745
[W].SVPQPKVLPIPQQVVPYPQ.[R]	SVPQPKVLPIPQQVVPYPQ		P05814	P05814 [170-188]	2114.2	39.18	833814	610025
[K].VLPIPQQVVPYPQRAVP.[V]	VLPIPQQVVPYPQRAVP		P05814	P05814 [176-192]	1901.1	39.39	832440	542159
[V].VLPVPQPEIMEVPK.[A]	VLPVPQPEIMEVPK		P05814	P05814 [90-103]	1575.88	38.43	830531	450183
[P].IPYGFLPQNILP.[L]	IPYGFLPQNILP		P05814	P05814 [72-83]	1371.77	51.66	823476	546906
[I].SHELDSASSEVN.[-]	SHELDSASSEVN	1xPhospho [S]	P10451	P10451 [303-314]	1354.52	19.48	820414	277281
[P].LAQPAVVLPVPQPEIMEVP.[K]	LAQPAVVLPVPQPEIMEVP		P05814	P05814 [84-102]	2027.12	42.93	814545	741051
[A].VVLPVPQPEIME.[V]	VVLPVPQPEIME	1xOxidation [M11]	P05814	P05814 [89-100]	1366.73	44.87	814177	391502
[R].ETIESLSSSEESITEY.[K]	ETIESLSSSEESITEY	1xPhospho [S/T]	P05814	P05814 [17-32]	1883.77	37.32	812797	382700
[R].ETIESLSSSEESITEYK.[Q]	ETIESLSSSEESITEYK	1xPhospho [S/T]	P05814	P05814 [17-33]	2011.86	38.87	804261	331690
[V].MPVLKSPTIPFFDPQIP.[K]	MPVLKSPTIPFFDPQIP	1xOxidation [M1]	P05814	P05814 [115-131]	1943.03	42.63	797542	374593
[P].EIMEVPKAKDT.[V]	EIMEVPKAKDT		P05814	P05814 [97-107]	1260.65	21.93	794943	622554
[Y].YANPAVVRPHAQIPQ.[R]	YANPAVVRPHAQIPQ		P07498	P07498 [81-95]	1660.89	16.11	792213	785538
[D].PQIPKLTDLEN.[L]	PQIPKLTDLEN		P05814	P05814 [128-138]	1267.69	36.5	790960	709378
[R].ETIESLSSSEESITEYKQKVEK.[V]	ETIESLSSSEESITEYKQKVEK		P05814	P05814 [17-38]	2544.26	32.74	786094	263571
[P].LLQPLMQQVPQPIP.[Q]	LLQPLMQQVPQPIP		P05814	P05814 [145-158]	1601.91	41.13	784848	388214
[R].LQNPSESSEPIPLESREEYMNGMN.[R]	LQNPSESSEPIPLESREEYMNGMN	1xOxidation [M]	P47710	P47710 [27-50]	2767.22	25.63	775535	223755
[S].DISNPTAHENYEK.[N]	DISNPTAHENYEK		P47710	P47710 [166-178]	1517.69	11.08	773867	744766
[L].NQELLLNPTHQIYPVTQPLAP.[V]	NQELLLNPTHQIYPVTQPLAP		P05814	P05814 [199-219]	2386.28	40.33	771687	524361
[R].RPDIQYPDATDEDITSHMESEELNGAY.[K]	RPDIQYPDATDEDITSHMESEELNGAY	1xPhospho [S/T]; 1xOxidation [M18]	P10451	P10451 [176-202]	3192.3	36.26	763867	228211
[A].NPAVVRPHAQIPQR.[Q]	NPAVVRPHAQIPQR		P07498	P07498 [83-96]	1582.89	12.21	763407	753490
[E].IMEVPKAKDTVYT.[K]	IMEVPKAKDTVYT	1xOxidation [M2]	P05814	P05814 [98-110]	1510.78	21.69	759005	206053
[Q].PLAPVHNPISV.[-]	PLAPVHNPISV		P05814	P05814 [216-226]	1143.65	33.44	757431	291095
[P].LMQQVPQPIPQTLALPPQP.[L]	LMQQVPQPIPQTLALPPQP		P05814	P05814 [149-167]	2096.16	48.8	753744	412046
[L].NPTHQIYPVTQPLAPV.[H]	NPTHQIYPVTQPLAPV		P05814	P05814 [205-220]	1774.95	31.06	752717	599642
[N].ILPLAQPAVVLPVPQPEIMEVPKAKDTVYT.[K]	ILPLAQPAVVLPVPQPEIMEVPKAKDTVYT		P05814	P05814 [81-110]	3256.83	41.99	750286	360799
[P].QPEIMEVPKAKDTVYT.[K]	QPEIMEVPKAKDTVYT	1xOxidation [M5]	P05814	P05814 [95-110]	1864.94	24.07	749445	503688
[R].RPAIAINNPYVPRT.[Y]	RPAIAINNPYVPRT		P07498	P07498 [66-79]	1581.89	22.25	737136	732661
[T].DLENLHLPL.[P]	DLENLHLPL		P05814	P05814 [135-143]	1063.58	48.57	731598	491390
[T].HQIYPVTQPL.[A]	HQIYPVTQPL		P05814	P05814 [208-217]	1195.65	30.71	731221	309911
[A].RETIESLSSSEESITEYKQKVE.[K]	RETIESLSSSEESITEYKQKVE		P05814	P05814 [16-37]	2572.26	23.94	730639	451031
[L].QPLMQQVPQPIP.[Q]	QPLMQQVPQPIP	1xOxidation [M4]	P05814	P05814 [147-158]	1391.74	24.68	727563	304220
[P].LAQPAVVLPVPQPEIMEVPKAK.[D]	LAQPAVVLPVPQPEIMEVPKAK	1xOxidation [M16]	P05814	P05814 [84-105]	2370.35	37.64	725203	685243
[S].DISNPTAHENYE.[K]	DISNPTAHENYE		P47710	P47710 [166-177]	1389.59	13.86	724680	595289
[Q].YVPFPPFSDISNPTAHENYEKNN.[V]	YVPFPPFSDISNPTAHENYEKNN		P47710	P47710 [158-180]	2680.23	39.86	716861	707411
[P].LAQPAVVLPVPQPEIME.[V]	LAQPAVVLPVPQPEIME	1xOxidation [M16]	P05814	P05814 [84-100]	1847	48.07	712990	683297
[R].RPDIQYPDATDEDITSHMESEELNGAY.[K]	RPDIQYPDATDEDITSHMESEELNGAY	2xPhospho [T/S]	P10451	P10451 [176-202]	3256.27	39.17	708857	309836
[L].AQPAVVLPVPQPEIMEVPKAKDTV.[Y]	AQPAVVLPVPQPEIMEVPKAKDTV		P05814	P05814 [85-108]	2556.41	40.03	703422	591145
[P].LAQPAVVLPVPQPEIMEVPKAKDTVYTKG.[R]	LAQPAVVLPVPQPEIMEVPKAKDTVYTKG	1xOxidation [M16]	P05814	P05814 [84-112]	3134.72	36.57	703156	553252
[R].LQNPSESSEPIP.[L]	LQNPSESSEPIP		P47710	P47710 [27-38]	1297.63	18.24	702749	493339
[Y].ANPAVVRPHAQIPQ.[R]	ANPAVVRPHAQIPQ		P07498	P07498 [82-95]	1497.83	14.25	693579	668963
[R].YPERLQNPSESSEPIP.[L]	YPERLQNPSESSEPIP		P47710	P47710 [23-38]	1842.89	28.34	691644	242161
[R].VMPVLKSPTIPFFDPQIPKLTDLEN.[L]	VMPVLKSPTIPFFDPQIPKLTDLEN	1xOxidation [M2]	P05814	P05814 [114-138]	2855.53	42.58	691609	481619
[K].VLPIPQQVVPYPQRAVPVQALLLNQE.[L]	VLPIPQQVVPYPQRAVPVQALLLNQE		P05814	P05814 [176-201]	2909.66	42.28	690434	612429
[D].IQYPDATDEDITSHMESEELNGAY.[K]	IQYPDATDEDITSHMESEELNGAY	1xPhospho [S/T]	P10451	P10451 [179-202]	2808.12	38.93	688392	267951
[R].MNENSHVQVPFQQLNQ.[L]	MNENSHVQVPFQQLNQ		P47710	P47710 [126-141]	1912.9	26.07	686878	620751
[A].RETIESLSSSEESITEYKQKVEK.[V]	RETIESLSSSEESITEYKQKVEK		P05814	P05814 [16-38]	2700.36	29.7	675279	231218
[D].QQQGEDEHQDKIYPSFQPQP.[L]	QQQGEDEHQDKIYPSFQPQP		P05814	P05814 [44-63]	2399.09	27.81	671484	285724
[E].NSHVQVPFQQ.[L]	NSHVQVPFQQ		P47710	P47710 [129-138]	1183.59	25.27	670232	660739
[P].QPEIMEVPKAKDT.[V]	QPEIMEVPKAKDT		P05814	P05814 [95-107]	1485.76	23.81	668702	503143
[L].FAEEKAVADTRDQADGSR.[A]	FAEEKAVADTRDQADGSR		P01833	P01833 [605-622]	1965.93	19.62	667403	284768
[Q].ELLLNPTHQIYPV.[T]	ELLLNPTHQIYPV		P05814	P05814 [201-213]	1536.84	39.6	661385	559993
[L].NPTHQIYPVTQPLAP.[V]	NPTHQIYPVTQPLAP		P05814	P05814 [205-219]	1675.88	26.2	651957	365842
[K].ADAAPDEKVLDSGFR.[E]	ADAAPDEKVLDSGFR		P01833	P01833 [578-592]	1590.78	19.4	639570	523655
[S].NPTAHENYEKNNVMLQW.[-]	NPTAHENYEKNNVMLQW		P47710	P47710 [169-185]	2087.96	29.03	634871	542767
[P].TIPFFDPQIPKLTDLEN.[L]	TIPFFDPQIPKLTDLEN		P05814	P05814 [122-138]	1988.04	42.8	633738	587301
[A].VVLPVPQPEIME.[V]	VVLPVPQPEIME		P05814	P05814 [89-100]	1350.73	48.43	631757	280063
[F].DPQIPKLTDLENLHL.[P]	DPQIPKLTDLENLHL		P05814	P05814 [127-141]	1745.94	41.73	629977	611949
[K].AIQDPRLFAEE.[K]	AIQDPRLFAEE		P01833	P01833 [598-608]	1288.65	33.09	623647	259085
[R].MNENSHVQVPFQQ.[L]	MNENSHVQVPFQQ	1xOxidation [M1]	P47710	P47710 [126-138]	1573.71	26.01	622786	569066
[P].EIMEVPKAKDTVYTKG.[R]	EIMEVPKAKDTVYTKG	1xOxidation [M3]	P05814	P05814 [97-112]	1824.94	20.73	622773	293454
[A].VVLPVPQPEIMEVPK.[A]	VVLPVPQPEIMEVPK	1xOxidation [M11]	P05814	P05814 [89-103]	1690.94	43.27	621655	279449
[A].VVLPVPQPEIMEVPKA.[K]	VVLPVPQPEIMEVPKA	1xOxidation [M11]	P05814	P05814 [89-104]	1761.98	37.12	620873	230613
[R].DQADGSRASVDSGSSEEQGGSSRALVST.[L]	DQADGSRASVDSGSSEEQGGSSRALVST		P01833	P01833 [616-643]	2740.23	21.77	620634	166621
[L].PVPQPEIMEVPKAKDTVYT.[K]	PVPQPEIMEVPKAKDTVYT		P05814	P05814 [92-110]	2142.12	27.7	615463	252352
[Q].IPKLTDLEN.[L]	IPKLTDLEN		P05814	P05814 [130-138]	1042.58	30.79	613254	510292
[A].VVLPVPQPEIMEVPKAKDTV.[Y]	VVLPVPQPEIMEVPKAKDTV		P05814	P05814 [89-108]	2189.22	39.92	612470	363475
[P].LAPVHNPISV.[-]	LAPVHNPISV		P05814	P05814 [217-226]	1046.6	30	605835	189085
[L].LNPTHQIYPVTQPL.[A]	LNPTHQIYPVTQPL		P05814	P05814 [204-217]	1620.87	29.06	605435	178116
[P].EIMEVPKAKDTVY.[T]	EIMEVPKAKDTVY		P05814	P05814 [97-109]	1522.78	27.23	601404	476533
[A].APDEKVLDSGFR.[E]	APDEKVLDSGFR		P01833	P01833 [581-592]	1333.67	24.97	600079	431220
[R].RPDIQYPDATDEDITSHMESEELNGAYK.[A]	RPDIQYPDATDEDITSHMESEELNGAYK	1xPhospho [S20]	P10451	P10451 [176-203]	3304.4	33.11	598330	206243
[Y].ANPAVVRPHAQIP.[Q]	ANPAVVRPHAQIP		P07498	P07498 [82-94]	1369.77	23.86	592905	580135
[R].VMPVLKSPTIP.[F]	VMPVLKSPTIP		P05814	P05814 [114-124]	1181.7	39.87	592684	473796
[L].DSGFREIEN.[K]	DSGFREIEN		P01833	P01833 [588-596]	1066.48	13.98	589412	461289
[Q].PAVVLPVPQPEIMEVPK.[A]	PAVVLPVPQPEIMEVPK		P05814	P05814 [87-103]	1843.04	48.8	584585	489773
[R].DQADGSRASVDSGSSEEQGGSSRALVSTLV.[P]	DQADGSRASVDSGSSEEQGGSSRALVSTLV		P01833	P01833 [616-645]	2952.38	35.52	583827	131326
[V].LPVPQPEIME.[V]	LPVPQPEIME		P05814	P05814 [91-100]	1152.6	33.46	581080	293505
[Q].IPKLTDLENL.[H]	IPKLTDLENL		P05814	P05814 [130-139]	1155.66	39.71	575496	378266
[Y].VPFPPFSDISNPTAHENYE.[K]	VPFPPFSDISNPTAHENYE		P47710	P47710 [159-177]	2160.99	40.24	572306	352183
[M].NENSHVQVPF.[Q]	NENSHVQVPF		P47710	P47710 [127-136]	1170.55	29.44	569749	498146
[K].VLDSGFREIEN.[K]	VLDSGFREIEN		P01833	P01833 [586-596]	1278.63	28.48	568933	418351
[I].MEVPKAKDTVYTK.[G]	MEVPKAKDTVYTK		P05814	P05814 [99-111]	1509.8	12.53	566363	556698
[A].QPAVVLPVPQPEIME.[V]	QPAVVLPVPQPEIME		P05814	P05814 [86-100]	1646.88	49.28	565471	446643
[P].LAQPAVVLPVPQPEIMEVPKAKDT.[V]	LAQPAVVLPVPQPEIMEVPKAKDT		P05814	P05814 [84-107]	2570.43	40.13	557651	368205
[L].LNQELLLNPTHQIYPV.[T]	LNQELLLNPTHQIYPV		P05814	P05814 [198-213]	1892.03	39.5	555663	422174
[Y].YANPAVVRPHAQIP.[Q]	YANPAVVRPHAQIP		P07498	P07498 [81-94]	1532.83	25.92	554545	543979
[F].FDPQIPKLTDLENLHLPLP.[L]	FDPQIPKLTDLENLHLPLP		P05814	P05814 [126-144]	2200.2	43.34	552337	233257
[R].DADTLHSKLIPTQPSQGAP.[-]	DADTLHSKLIPTQPSQGAP		Q13410	Q13410 [508-526]	1976.01	28.48	551753	146994
[P].DIQYPDATDEDITSHMESEELNGAY.[K]	DIQYPDATDEDITSHMESEELNGAY		P10451	P10451 [178-202]	2843.18	46.55	551667	189900
[F].FDPQIPKLTDLENL.[H]	FDPQIPKLTDLENL		P05814	P05814 [126-139]	1642.87	41.9	550059	347808
[K].AVADTRDQADGSRASVDSGSSEEQGGSSRALVSTLV.[P]	AVADTRDQADGSRASVDSGSSEEQGGSSRALVSTLV		P01833	P01833 [610-645]	3565.7	32.55	547659	126078
[P].LAQPAVVLPVPQPEIMEVPKAKDTVYTKGR.[V]	LAQPAVVLPVPQPEIMEVPKAKDTVYTKGR		P05814	P05814 [84-113]	3274.82	38.86	546925	531425
[K].DTVYTKGRVMPVL.[K]	DTVYTKGRVMPVL		P05814	P05814 [106-118]	1478.8	33.9	546551	475284
[Q].DPRLFAEE.[K]	DPRLFAEE		P01833	P01833 [601-608]	976.473	27.7	540809	302958
[P].LAQPAVVLPVPQPEIMEVPKAKD.[T]	LAQPAVVLPVPQPEIMEVPKAKD		P05814	P05814 [84-106]	2469.38	40.19	536040	501911
[L].NEYNQLQLQAAHAQEQIR.[R]	NEYNQLQLQAAHAQEQIR		P47710	P47710 [107-124]	2154.07	31.76	530023	428406
[A].RETIESLSSSEESITEYK.[Q]	RETIESLSSSEESITEYK		P05814	P05814 [16-33]	2088	31.6	528305	147802
[Q].PLMQQVPQPIPQT.[L]	PLMQQVPQPIPQT	1xOxidation [M3]	P05814	P05814 [148-160]	1492.78	33.17	527533	430898
[L].AQPAVVLPVPQPEIMEVP.[K]	AQPAVVLPVPQPEIMEVP		P05814	P05814 [85-102]	1914.04	42.58	521758	278193
[L].PIPQQVVPYPQ.[R]	PIPQQVVPYPQ		P05814	P05814 [178-188]	1265.69	39.73	520753	496247
[K].AVADTRDQADGSRASVDSGSSEEQGGSSR.[A]	AVADTRDQADGSRASVDSGSSEEQGGSSR		P01833	P01833 [610-638]	2882.27	12.67	518806	192894
[T].IPFFDPQIPK.[L]	IPFFDPQIPK		P05814	P05814 [123-132]	1201.66	39.85	517181	246640
[A].EEKAVADTRDQADGSRASVDSGSSEEQGGSS.[R]	EEKAVADTRDQADGSRASVDSGSSEEQGGSS		P01833	P01833 [607-637]	3112.35	13.2	514732	151275
[Q].RNILREKQTDEIKDT.[R]	RNILREKQTDEIKDT		P47710	P47710 [53-67]	1859	19.48	513732	359018
[A].VVLPVPQPEIMEVP.[K]	VVLPVPQPEIMEVP	1xOxidation [M11]	P05814	P05814 [89-102]	1562.85	40.38	511545	225819
[N].ENSHVQVPFQQLNQ.[L]	ENSHVQVPFQQLNQ		P47710	P47710 [128-141]	1667.81	24.29	505444	473154
[P].DIQYPDATDEDITSHMESEELNGAY.[K]	DIQYPDATDEDITSHMESEELNGAY	1xPhospho [S/T]	P10451	P10451 [178-202]	2923.15	47.52	505182	190979
[V].VLPVPQPEIMEVPKA.[K]	VLPVPQPEIMEVPKA		P05814	P05814 [90-104]	1646.92	39.18	505133	250058
[Q].VPQPIPQTLALPPQP.[L]	VPQPIPQTLALPPQP		P05814	P05814 [153-167]	1595.92	39.13	504769	286659
[P].VLKSPTIPFFDPQIPK.[L]	VLKSPTIPFFDPQIPK		P05814	P05814 [117-132]	1827.04	48.59	502959	374002
[V].LPIPQQVVPYPQRAVP.[V]	LPIPQQVVPYPQRAVP		P05814	P05814 [177-192]	1802.03	37.4	502674	266705
[P].LLQPLMQQVPQPIPQTL.[A]	LLQPLMQQVPQPIPQTL	1xOxidation [M6]	P05814	P05814 [145-161]	1960.09	48.42	498378	356403
[E].RLQNPSESSEPIPLESREEYMNGMN.[R]	RLQNPSESSEPIPLESREEYMNGMN	2xOxidation [M21; M24]	P47710	P47710 [26-50]	2939.31	26.95	497927	252402
[Q].IPQRQYLPNSHPPTVV.[R]	IPQRQYLPNSHPPTVV		P07498	P07498 [93-108]	1846	19.68	497396	429500
[E].RLQNPSESSEPIPLESREEYMNGMN.[R]	RLQNPSESSEPIPLESREEYMNGMN	2xPhospho [S9; S16]	P47710	P47710 [26-50]	3067.26	40.13	493075	194633
[P].VPQPEIMEVPKAKDT.[V]	VPQPEIMEVPKAKDT	1xOxidation [M7]	P05814	P05814 [93-107]	1697.88	23.04	492884	254881
[V].MPVLKSPTIP.[F]	MPVLKSPTIP	1xOxidation [M1]	P05814	P05814 [115-124]	1098.62	29.83	492121	214164
[E].QIRRMNENSHVQVPFQQ.[L]	QIRRMNENSHVQVPFQQ		P47710	P47710 [122-138]	2111.06	16.55	490395	488566
[M].NENSHVQVPFQ.[Q]	NENSHVQVPFQ		P47710	P47710 [127-137]	1298.61	26.58	484942	415829
[L].NQELLLNPTHQIYPVTQP.[L]	NQELLLNPTHQIYPVTQP		P05814	P05814 [199-216]	2105.1	38.74	484821	321464
[I].NNPYVP.[R]	NNPYVP		P07498	P07498 [72-77]	703.341	23.46	481656	436240
[V].VLPVPQPEIM.[E]	VLPVPQPEIM		P05814	P05814 [90-99]	1122.62	47	480497	362577
[Y].VPMYYVPNSYPYYGTN.[L]	VPMYYVPNSYPYYGTN		P07498	P07498 [46-61]	1927.86	46.59	480228	449179
[Q].YVPFPPFSDISNPTAHENYE.[K]	YVPFPPFSDISNPTAHENYE		P47710	P47710 [158-177]	2324.05	41.35	476783	232395
[L].NEYNQLQLQAAHAQEQI.[R]	NEYNQLQLQAAHAQEQI		P47710	P47710 [107-123]	1997.97	36.84	476763	340937
[F].AEEKAVADTRDQADGSRASVDSGSSEEQGGSS.[R]	AEEKAVADTRDQADGSRASVDSGSSEEQGGSS		P01833	P01833 [606-637]	3183.39	5.44	475329	125866
[R].ETIESLSSSEESITEYKQKVE.[K]	ETIESLSSSEESITEYKQKVE	2xPhospho [S]	P05814	P05814 [17-37]	2576.09	35.77	473839	136292
[E].DQQQGEDEHQDKIYP.[S]	DQQQGEDEHQDKIYP		P05814	P05814 [43-57]	1829.79	20.73	473231	95155.7
[Q].NPSESSEPIPLE.[S]	NPSESSEPIPLE		P47710	P47710 [29-40]	1298.61	30.22	473125	150117
[K].VKHEDQQQGEDEHQDKIYPSF.[Q]	VKHEDQQQGEDEHQDKIYPSF		P05814	P05814 [39-59]	2557.16	24.45	471901	196182
[A].VVLPVPQPEIMEVPKAKDT.[V]	VVLPVPQPEIMEVPKAKDT	1xOxidation [M11]	P05814	P05814 [89-107]	2106.15	37.68	470512	237209
[T].HQIYPVTQPLAPVHNPISV.[-]	HQIYPVTQPLAPVHNPISV		P05814	P05814 [208-226]	2110.14	35.59	468709	301131
[K].SPTIPFFD.[P]	SPTIPFFD		P05814	P05814 [120-127]	923.451	41.74	465272	348832
[A].INNPYVPRTYYANPAVVRPHAQIPQ.[R]	INNPYVPRTYYANPAVVRPHAQIPQ		P07498	P07498 [71-95]	2878.51	27.32	464550	462845
[K].AVADTRDQADGSRASVDSGSSEEQGGSSRAL.[V]	AVADTRDQADGSRASVDSGSSEEQGGSSRAL		P01833	P01833 [610-640]	3066.4	19.69	463473	88963.1
[T].YYANPAVVRPHAQIPQ.[R]	YYANPAVVRPHAQIPQ		P07498	P07498 [80-95]	1823.96	18	458394	452348
[Y].YANPAVVRPHAQIPQR.[Q]	YANPAVVRPHAQIPQR		P07498	P07498 [81-96]	1816.99	14.45	457225	455028
[A].QPAVVLPVPQPEIMEVPKAKDTVYTK.[G]	QPAVVLPVPQPEIMEVPKAKDTVYTK		P05814	P05814 [86-111]	2877.58	39.02	453067	377841
[K].SPTIPFFDPQIPKLTD.[L]	SPTIPFFDPQIPKLTD		P05814	P05814 [120-135]	1815.95	42.4	449600	299056
[R].PDIQYPDATDEDITSHMESEELNGAY.[K]	PDIQYPDATDEDITSHMESEELNGAY	1xPhospho [S19]	P10451	P10451 [177-202]	3020.2	47.51	448502	227154
[Q].IYPVTQPLAPVHNPISV.[-]	IYPVTQPLAPVHNPISV		P05814	P05814 [210-226]	1845.03	39.34	447538	173414
[P].VPQPEIMEVPKA.[K]	VPQPEIMEVPKA		P05814	P05814 [93-104]	1337.71	33.45	447111	213106
[K].GRVMPVLKSPTIPF.[F]	GRVMPVLKSPTIPF		P05814	P05814 [112-125]	1541.89	39.17	446211	405930
[E].LLLNPTHQIYP.[V]	LLLNPTHQIYP		P05814	P05814 [202-212]	1308.73	33.64	444575	368630
[L].FAEEKAVADTRDQADGSRASVDSGSSEE.[Q]	FAEEKAVADTRDQADGSRASVDSGSSEE		P01833	P01833 [605-632]	2914.29	13.63	443273	148435
[K].ADAAPDEKVLDSGFREIENKAIQDPR.[L]	ADAAPDEKVLDSGFREIENKAIQDPR		P01833	P01833 [578-603]	2884.44	36.01	440577	175648
[V].VPYPQRAVPVQA.[L]	VPYPQRAVPVQA		P05814	P05814 [184-195]	1324.74	17.42	437260	228412
[V].KHEDQQQGEDEHQDKIYPSFQP.[Q]	KHEDQQQGEDEHQDKIYPSFQP		P05814	P05814 [40-61]	2683.2	17.01	436594	433332
[L].NQELLLNPTHQ.[I]	NQELLLNPTHQ		P05814	P05814 [199-209]	1306.67	28.12	435837	305711
[A].VVLPVPQPEIM.[E]	VVLPVPQPEIM	1xOxidation [M11]	P05814	P05814 [89-99]	1237.69	44.87	435567	132988
[L].QPLMQQVPQPIPQTLALPPQP.[L]	QPLMQQVPQPIPQTLALPPQP		P05814	P05814 [147-167]	2321.27	40.97	435565	208956
[A].RETIESLSSSEESITEY.[K]	RETIESLSSSEESITEY	1xPhospho [S/T]	P05814	P05814 [16-32]	2039.87	28.8	435275	140486
[R].ASVDSGSSEEQGGSSRALVSTLVP.[L]	ASVDSGSSEEQGGSSRALVSTLVP		P01833	P01833 [623-646]	2320.13	34.35	434588	88879.7
[K].GRVMPVLKSPTIP.[F]	GRVMPVLKSPTIP	1xOxidation [M4]	P05814	P05814 [112-124]	1410.81	28.49	431351	273749
[R].RPAIAINNPYVPR.[T]	RPAIAINNPYVPR		P07498	P07498 [66-78]	1480.84	29.39	429256	420670
[K].DDPDAPLQPVTPLQ.[L]	DDPDAPLQPVTPLQ		P0C0L4	P0C0L5 [1429-1442]	1505.75	38.22	429040	312712
[S].DISNPTAHENYEKNNV.[M]	DISNPTAHENYEKNNV		P47710	P47710 [166-181]	1844.84	21.66	426555	145815
[K].LPLRYPERLQNPSESSEPIP.[L]	LPLRYPERLQNPSESSEPIP	1xPhospho [S]	P47710	P47710 [19-38]	2402.18	39.89	426405	166851
[R].RPDIQYPDATDEDITSHMESEELNGAY.[K]	RPDIQYPDATDEDITSHMESEELNGAY	1xOxidation [M18]	P10451	P10451 [176-202]	3112.33	34.48	425951	168995
[Q].IRRMNENSHVQVPFQQ.[L]	IRRMNENSHVQVPFQQ		P47710	P47710 [123-138]	1983	16.24	425462	425462
[E].RLQNPSESSEPIP.[L]	RLQNPSESSEPIP		P47710	P47710 [26-38]	1453.73	24.32	424177	219260
[L].LLNPTHQIYPVTQPLAPVHNP.[I]	LLNPTHQIYPVTQPLAPVHNP		P05814	P05814 [203-223]	2349.27	32.91	422061	371725
[R].LQNPSESSEPIPLESREEYMNGMN.[R]	LQNPSESSEPIPLESREEYMNGMN	2xPhospho [S8; S15]; 2xOxidation [M20; M23]	P47710	P47710 [27-50]	2943.15	25.25	421818	237617
[R].ETIESLSSSEESITEYKQKVE.[K]	ETIESLSSSEESITEYKQKVE	1xPhospho [S]	P05814	P05814 [17-37]	2496.13	25.63	420818	171534
[K].GRVMPVLKSPTIPFFDPQIPK.[L]	GRVMPVLKSPTIPFFDPQIPK	1xOxidation [M4]	P05814	P05814 [112-132]	2383.32	40.19	420814	320854
[T].APYVPMYYVPNSYP.[Y]	APYVPMYYVPNSYP		P07498	P07498 [43-56]	1660.77	40.57	417249	417249
[M].KPVPDLVPGNF.[K]	KPVPDLVPGNF		P02671	P02671 [227-237]	1182.65	41.16	415191	177113
[L].SSSEESITEY.[K]	SSSEESITEY		P05814	P05814 [23-32]	1131.47	24.05	414484	243324
[K].AIPVAQDLNAPSDWDSRGKDSYETSQLDDQSAETHSHKQS.[R]	AIPVAQDLNAPSDWDSRGKDSYETSQLDDQSAETHSHKQS	1xPhospho [S/T]	P10451	P10451 [204-243]	4493.98	34.24	412264	176387
[V].EPIPYGFLPQNI.[L]	EPIPYGFLPQNI		P05814	P05814 [70-81]	1387.73	42.3	412156	202016
[P].LLQPLMQQVPQPIPQTL.[A]	LLQPLMQQVPQPIPQTL		P05814	P05814 [145-161]	1944.1	41.76	410893	204481
[P].VLKSPTIPFFDPQIPKLTDLEN.[L]	VLKSPTIPFFDPQIPKLTDLEN		P05814	P05814 [117-138]	2512.37	42.41	410402	384434
[A].IPVKQADSGSSEEKQLYNKYPDAVAT.[W]	IPVKQADSGSSEEKQLYNKYPDAVAT		P10451	P10451 [17-42]	2838.42	25.51	409510	268983
[D].LNAPSDWDSRGKDSYETSQLDDQSAETHSHKQS.[R]	LNAPSDWDSRGKDSYETSQLDDQSAETHSHKQS	3xPhospho [S9; S14; S18]	P10451	P10451 [211-243]	3959.54	17.41	408009	283615
[R].AVPVQALLLNQELLLNPTHQIYPVTQPLAPVHNPISV.[-]	AVPVQALLLNQELLLNPTHQIYPVTQPLAPVHNPISV		P05814	P05814 [190-226]	4037.26	43.52	407860	201383
[R].LQNPSESSEPIPLESREEYMNGMN.[R]	LQNPSESSEPIPLESREEYMNGMN	1xPhospho [S]; 2xOxidation [M20; M23]	P47710	P47710 [27-50]	2863.18	30.99	407603	111722
[P].DIQYPDATDEDITSH.[M]	DIQYPDATDEDITSH		P10451	P10451 [178-192]	1719.73	27.16	406994	202010
[F].FDPQIPKLTDLENLHLP.[L]	FDPQIPKLTDLENLHLP		P05814	P05814 [126-142]	1990.06	42.39	405884	360875
[Q].QGEDEHQDKIYPSFQPQP.[L]	QGEDEHQDKIYPSFQPQP		P05814	P05814 [46-63]	2142.97	28.09	405689	211145
[R].LFAEEKAVADTRDQADGSR.[A]	LFAEEKAVADTRDQADGSR		P01833	P01833 [604-622]	2079.01	23.23	405673	224637
[M].PVLKSPTIPFFDPQIP.[K]	PVLKSPTIPFFDPQIP		P05814	P05814 [116-131]	1796	42.76	404407	223427
[N].ILPLAQPAVVLPVPQPEIMEVPK.[A]	ILPLAQPAVVLPVPQPEIMEVPK	1xOxidation [M19]	P05814	P05814 [81-103]	2494.44	41.92	404194	188960
[K].VLPIPQQVVPYPQRAVPV.[Q]	VLPIPQQVVPYPQRAVPV		P05814	P05814 [176-193]	2000.17	40.08	403599	321645
[E].RLQNPSESSEPIPLESREEYMNGMN.[R]	RLQNPSESSEPIPLESREEYMNGMN	1xPhospho [S16]; 2xOxidation [M21; M24]	P47710	P47710 [26-50]	3019.28	28.47	401583	91139.1
[P].LESREEYMNGMN.[R]	LESREEYMNGMN	1xPhospho [S3]	P47710	P47710 [39-50]	1552.58	16.9	401538	290419
[T].IESLSSSEESITEYKQKVE.[K]	IESLSSSEESITEYKQKVE	2xPhospho [S]	P05814	P05814 [19-37]	2346	32.06	400813	110407
[K].AVADTRDQADGSRASVDSGSSEEQ.[G]	AVADTRDQADGSRASVDSGSSEEQ		P01833	P01833 [610-633]	2438.07	12.75	400083	61661.2
[A].VADTRDQADGSRASVDSGSSEEQGGSSRA.[L]	VADTRDQADGSRASVDSGSSEEQGGSSRA		P01833	P01833 [611-639]	2882.27	12.61	398877	212059
[P].VPQPEIMEVPKAKDTVY.[T]	VPQPEIMEVPKAKDTVY		P05814	P05814 [93-109]	1944.01	26.9	398038	382280
[A].VPVQAL.[L]	VPVQAL		P05814	P05814 [191-196]	626.387	17.16	397455	375364
[N].SHVQVPFQQ.[L]	SHVQVPFQQ		P47710	P47710 [130-138]	1069.54	17.13	396271	373385
[P].VPQPEIMEVPKAKDTVY.[T]	VPQPEIMEVPKAKDTVY	1xOxidation [M7]	P05814	P05814 [93-109]	1960.01	26.73	395844	362159
[A].VVLPVPQPEIMEVPKAKD.[T]	VVLPVPQPEIMEVPKAKD		P05814	P05814 [89-106]	1989.11	46.43	390731	265196
[K].AIPVAQDLNAPSDWDSRGKDSYETSQLDDQSAETHSHKQS.[R]	AIPVAQDLNAPSDWDSRGKDSYETSQLDDQSAETHSHKQS	2xPhospho [S16; S21]	P10451	P10451 [204-243]	4573.94	27.41	389334	143280
[R].LNEYNQLQLQAAHAQEQIR.[R]	LNEYNQLQLQAAHAQEQIR		P47710	P47710 [106-124]	2267.15	34.91	386373	274775
[V].VLPVPQPEIME.[V]	VLPVPQPEIME		P05814	P05814 [90-100]	1251.67	37.93	385076	329854
[Q].YVPFPPFSDISNPTAHENYEK.[N]	YVPFPPFSDISNPTAHENYEK		P47710	P47710 [158-178]	2452.15	40	383814	155802
[R].DVSLAKADAAPDE.[K]	DVSLAKADAAPDE		P01833	P01833 [572-584]	1301.62	22.99	382892	283783
[K].AIQDPRLFAEEKAVADTR.[D]	AIQDPRLFAEEKAVADTR		P01833	P01833 [598-615]	2030.07	30.83	381863	175597
[K].SPTIPFFDPQIPKLTDLENLHLPLP.[L]	SPTIPFFDPQIPKLTDLENLHLPLP		P05814	P05814 [120-144]	2842.54	44.45	379341	248604
[K].LPLRYPERLQNPSESSEPIPLESREEYMNGMN.[R]	LPLRYPERLQNPSESSEPIPLESREEYMNGMN	1xPhospho [S23]; 1xOxidation [M]	P47710	P47710 [19-50]	3871.77	34.5	375232	148298
[F].DPQIPKLTDL.[E]	DPQIPKLTDL		P05814	P05814 [127-136]	1139.63	37.47	372992	216909
[V].DSGSSEEQGGSSRALVSTLVP.[L]	DSGSSEEQGGSSRALVSTLVP		P01833	P01833 [626-646]	2062.99	42.78	371289	92628.7
[K].LPLRYPERLQNPSESSEPIPL.[E]	LPLRYPERLQNPSESSEPIPL	1xPhospho [S]	P47710	P47710 [19-39]	2515.26	39.26	368611	185214
[K].GRVMPVLKSPTIPFFDPQIPKLTDLEN.[L]	GRVMPVLKSPTIPFFDPQIPKLTDLEN	1xOxidation [M4]	P05814	P05814 [112-138]	3068.65	41.97	367877	198297
[C].HPNSPLDEENLTQENQDR.[G]	HPNSPLDEENLTQENQDR		P01011	P01011 [24-41]	2135.96	23.92	366684	338959
[L].AQPAVVLPVPQPEIMEVPKAKDT.[V]	AQPAVVLPVPQPEIMEVPKAKDT	1xOxidation [M15]	P05814	P05814 [85-107]	2473.34	42.19	365434	172315
[I].QDPRLFAEEKAVADT.[R]	QDPRLFAEEKAVADT		P01833	P01833 [600-614]	1689.84	28.41	362799	256925
[V].LPVPQPEIME.[V]	LPVPQPEIME	1xOxidation [M9]	P05814	P05814 [91-100]	1168.59	33.2	362793	135894
[A].VVLPVPQPEI.[M]	VVLPVPQPEI		P05814	P05814 [89-98]	1090.65	47.99	362167	138713
[E].IMEVPKAKDTVY.[T]	IMEVPKAKDTVY		P05814	P05814 [98-109]	1393.74	25.11	360949	292477
[K].LTDLENLHLP.[L]	LTDLENLHLP		P05814	P05814 [133-142]	1164.63	39.58	358808	275046
[L].FAEEKAVADTRDQAD.[G]	FAEEKAVADTRDQAD		P01833	P01833 [605-619]	1665.77	19.82	358400	105492
[N].ILPLAQPAVVLPVPQPEIMEVPKAKDTVYTK.[G]	ILPLAQPAVVLPVPQPEIMEVPKAKDTVYTK		P05814	P05814 [81-111]	3384.92	41.31	357921	247399
[K].GRVMPVLKSPTIPFFDPQIP.[K]	GRVMPVLKSPTIPFFDPQIP		P05814	P05814 [112-131]	2239.23	42.32	355257	197417
[V].EKVKHEDQQQGEDEHQDKIYPSFQPQP.[L]	EKVKHEDQQQGEDEHQDKIYPSFQPQP		P05814	P05814 [37-63]	3264.52	24.27	353719	248724
[L].LNQELLLNPTHQIYPVTQPLAPVHNP.[I]	LNQELLLNPTHQIYPVTQPLAPVHNP		P05814	P05814 [198-223]	2946.58	40.37	351042	217915
[Q].QVVPYPQRAVPVQA.[L]	QVVPYPQRAVPVQA		P05814	P05814 [182-195]	1551.86	21.5	351002	154926
[Y].VPNSYPYYGTNLYQRRPAIA.[I]	VPNSYPYYGTNLYQRRPAIA		P07498	P07498 [51-70]	2343.19	28.01	346717	344828
[P].FPPFSDISNPTAHENYEKNNV.[M]	FPPFSDISNPTAHENYEKNNV		P47710	P47710 [161-181]	2420.12	31.51	345731	279906
[K].AVADTRDQADGSRASVDSGSSEEQGGSSRALV.[S]	AVADTRDQADGSRASVDSGSSEEQGGSSRALV		P01833	P01833 [610-641]	3165.46	21.98	339449	89799.7
[L].AQPAVVLPVPQPEIM.[E]	AQPAVVLPVPQPEIM		P05814	P05814 [85-99]	1588.88	49.66	338739	90291.6
[R].LNEYNQLQLQAAHAQEQIRR.[M]	LNEYNQLQLQAAHAQEQIRR		P47710	P47710 [106-125]	2423.25	24.78	338105	242896
[A].DAAPDEKVLDSGFREIENK.[A]	DAAPDEKVLDSGFREIENK		P01833	P01833 [579-597]	2133.05	36.85	328962	189791
[A].QPAVVLPVPQPEIMEVP.[K]	QPAVVLPVPQPEIMEVP	1xOxidation [M14]	P05814	P05814 [86-102]	1859	40.99	326022	149943
[R].VMPVLKSPTIPFFDPQIP.[K]	VMPVLKSPTIPFFDPQIP	1xOxidation [M2]	P05814	P05814 [114-131]	2042.1	42.81	324030	217664
[L].LNPTHQIYPVTQPLAPVHNPIS.[V]	LNPTHQIYPVTQPLAPVHNPIS		P05814	P05814 [204-225]	2436.3	33.33	322413	223446
[R].RMNENSHVQVPFQQ.[L]	RMNENSHVQVPFQQ	1xOxidation [M2]	P47710	P47710 [125-138]	1729.81	24.2	322337	309969
[A].QPAVVLPVPQPEIMEVPKAKDTVYT.[K]	QPAVVLPVPQPEIMEVPKAKDTVYT	1xOxidation [M14]	P05814	P05814 [86-110]	2765.48	38.23	322189	157990
[K].LPLRYPERLQNPSE.[S]	LPLRYPERLQNPSE		P47710	P47710 [19-32]	1711.91	19.99	320759	164284
[P].LIYPFVEPIPY.[G]	LIYPFVEPIPY		P05814	P05814 [64-74]	1350.73	51.68	318561	268646
[A].IQDPRLFAEEKAVADTRDQADGS.[R]	IQDPRLFAEEKAVADTRDQADGS		P01833	P01833 [599-621]	2532.23	21.99	317944	158777
[M].QQVPQPIPQTLALPPQP.[L]	QQVPQPIPQTLALPPQP		P05814	P05814 [151-167]	1852.03	39.07	315180	121701
[P].LMQQVPQPIPQTLALPPQPLWSVPQP.[K]	LMQQVPQPIPQTLALPPQPLWSVPQP		P05814	P05814 [149-174]	2903.59	43.23	314877	301926
[P].LWSVPQPKVLPIP.[Q]	LWSVPQPKVLPIP		P05814	P05814 [168-180]	1473.88	41.82	313393	260237
[A].QPAVVLPVPQP.[E]	QPAVVLPVPQP		P05814	P05814 [86-96]	1144.67	36.73	313074	226608
[K].SPTIPFFDPQ.[I]	SPTIPFFDPQ		P05814	P05814 [120-129]	1148.56	49.43	311937	186982
[P].AVVLPVPQPEIMEVPKA.[K]	AVVLPVPQPEIMEVPKA		P05814	P05814 [88-104]	1817.02	48.67	311530	184425
[R].EIENKAIQDPRLFAEEKAVADT.[R]	EIENKAIQDPRLFAEEKAVADT		P01833	P01833 [593-614]	2487.27	26.54	310176	113624
[P].DEKVLDSGF.[R]	DEKVLDSGF		P01833	P01833 [583-591]	1009.48	29.16	306575	205567
[P].LAQPAVVLPVPQPEIM.[E]	LAQPAVVLPVPQPEIM		P05814	P05814 [84-99]	1701.96	41.87	305852	225882
[R].RPDIQYPDATDEDITSH.[M]	RPDIQYPDATDEDITSH		P10451	P10451 [176-192]	1972.89	25.62	305477	90541.7
[R].LQNPSESSEPIPLESREEYMNG.[M]	LQNPSESSEPIPLESREEYMNG	2xPhospho [S8; S15]	P47710	P47710 [27-48]	2666.07	40.8	305430	280799
[Q].DKIYPSFQPQP.[L]	DKIYPSFQPQP		P05814	P05814 [53-63]	1319.66	30.2	304408	161958
[A].QPAVVLPVPQPEIMEVPKAKDTVYTKG.[R]	QPAVVLPVPQPEIMEVPKAKDTVYTKG		P05814	P05814 [86-112]	2934.6	39.01	302514	145918
[A].VVLPVPQPEIMEVP.[K]	VVLPVPQPEIMEVP		P05814	P05814 [89-102]	1546.85	42.33	302444	150206
[R].YPERLQNPSESSEPIPL.[E]	YPERLQNPSESSEPIPL		P47710	P47710 [23-39]	1955.97	38.75	301785	143517
[L].IYPFVEPIPYGFLPQN.[I]	IYPFVEPIPYGFLPQN		P05814	P05814 [65-80]	1893.98	44.39	301433	172571
[Q].QQGEDEHQDKIYPSFQPQP.[L]	QQGEDEHQDKIYPSFQPQP		P05814	P05814 [45-63]	2271.03	20.06	301374	161778
[Q].IPKLTDLENLHLPLP.[L]	IPKLTDLENLHLPLP		P05814	P05814 [130-144]	1712.99	42.61	301267	151668
[K].VLDSGFREIENK.[A]	VLDSGFREIENK		P01833	P01833 [586-597]	1406.73	25.56	300070	217997
[R].LFAEEKAVADTRDQA.[D]	LFAEEKAVADTRDQA		P01833	P01833 [604-618]	1663.83	16	299728	120303
[L].NQELLLNPTHQIYPVTQPLA.[P]	NQELLLNPTHQIYPVTQPLA		P05814	P05814 [199-218]	2289.22	48.13	298322	293225
[E].IMEVPKAKDTVYTK.[G]	IMEVPKAKDTVYTK		P05814	P05814 [98-111]	1622.88	14.28	297698	274455
[V].PQPEIMEVPKAKDTVYT.[K]	PQPEIMEVPKAKDTVYT		P05814	P05814 [94-110]	1945.99	48.5	297386	249581
[R].DVSLAKADAAPDEKVL.[D]	DVSLAKADAAPDEKVL		P01833	P01833 [572-587]	1641.87	21.52	297324	205985
[A].DGSRASVDSGSSEEQGGSSRALVSTLVPLG.[L]	DGSRASVDSGSSEEQGGSSRALVSTLVPLG		P01833	P01833 [619-648]	2905.41	38.66	294340	118122
[P].EIMEVPKAKDTVYTK.[G]	EIMEVPKAKDTVYTK		P05814	P05814 [97-111]	1751.92	23.76	292897	231252
[R].LNEYNQLQ.[L]	LNEYNQLQ		P47710	P47710 [106-113]	1021.49	15.06	292592	286311
[A].LPPQPLWS.[V]	LPPQPLWS		P05814	P05814 [163-170]	937.514	32.88	291697	170182
[A].VADTRDQADGSRASVDSGSSEEQGGSS.[R]	VADTRDQADGSRASVDSGSSEEQGGSS		P01833	P01833 [611-637]	2655.14	12.49	290384	85693.3
[R].DVSLAKADAAPDEKVLDSGFRE.[I]	DVSLAKADAAPDEKVLDSGFRE		P01833	P01833 [572-593]	2333.16	26.81	289951	242979
[T].YYANPAVVRPHAQIP.[Q]	YYANPAVVRPHAQIP		P07498	P07498 [80-94]	1695.9	28.34	289692	287270
[A].IPVKQADSGSSEEKQLYNKYPDAVATWLNPDPSQK.[Q]	IPVKQADSGSSEEKQLYNKYPDAVATWLNPDPSQK	3xPhospho [S8; S10; S11]	P10451	P10451 [17-51]	4143.84	40.59	289649	286371
[V].SLAKADAAPDEKVLDSGFR.[E]	SLAKADAAPDEKVLDSGFR		P01833	P01833 [574-592]	1990.02	26.75	289556	245200
[K].GIPFAAPTKALENPQPHPGWQGTL.[K]	GIPFAAPTKALENPQPHPGWQGTL		P19835	P19835 [52-75]	2527.31	39.5	289351	152623
[A].VVLPVPQPEIMEVPKAK.[D]	VVLPVPQPEIMEVPKAK		P05814	P05814 [89-105]	1874.08	46.24	289139	112292
[P].LIYPFVEPIPYGFLPQN.[I]	LIYPFVEPIPYGFLPQN		P05814	P05814 [64-80]	2007.06	44.63	288658	277405
[V].MPVLKSPTIPFFDPQIPK.[L]	MPVLKSPTIPFFDPQIPK	1xOxidation [M1]	P05814	P05814 [115-132]	2071.13	40.89	288648	195979
[K].HEDQQQGEDEHQDKIYPSFQ.[P]	HEDQQQGEDEHQDKIYPSFQ		P05814	P05814 [41-60]	2458.05	24.23	287536	275703
[L].LLNQELLLNPTHQIYP.[V]	LLNQELLLNPTHQIYP		P05814	P05814 [197-212]	1906.04	48.75	286664	236637
[P].QPEIMEVPKAKDTVY.[T]	QPEIMEVPKAKDTVY		P05814	P05814 [95-109]	1747.89	30.29	286460	277595
[R].LFAEEKAVADT.[R]	LFAEEKAVADT		P01833	P01833 [604-614]	1193.6	16.96	285588	173227
[Q].ELLLNPTHQ.[I]	ELLLNPTHQ		P05814	P05814 [201-209]	1064.57	19.84	285259	123643
[K].DLAPPSEPSESFQEHTVDGENQ.[I]	DLAPPSEPSESFQEHTVDGENQ		P24821	P24821 [76-97]	2413.04	29.95	284986	277521
[E].IMEVPKAKDTVY.[T]	IMEVPKAKDTVY	1xOxidation [M2]	P05814	P05814 [98-109]	1409.73	22.13	283198	159177
[K].AIQDPRLFAEEKAVA.[D]	AIQDPRLFAEEKAVA		P01833	P01833 [598-612]	1657.89	24.55	281132	57618.8
[S].EEQGGSSRALVSTLVP.[L]	EEQGGSSRALVSTLVP		P01833	P01833 [631-646]	1629.84	40.69	280834	117445
[K].GRVMPVLKSPTIPFFDPQIP.[K]	GRVMPVLKSPTIPFFDPQIP	1xOxidation [M4]	P05814	P05814 [112-131]	2255.23	41.9	280724	165437
[F].AEEKAVADTRDQADGSRASVDSGSSEEQGGSSRA.[L]	AEEKAVADTRDQADGSRASVDSGSSEEQGGSSRA		P01833	P01833 [606-639]	3410.53	13.31	277587	59669.9
[R].LQNPSESSEPIPLESREEYMNGMNRQ.[R]	LQNPSESSEPIPLESREEYMNGMNRQ	1xPhospho [S]	P47710	P47710 [27-52]	3115.35	29.2	276841	179388
[S].SSEESITEY.[K]	SSEESITEY		P05814	P05814 [24-32]	1044.44	24.05	276333	150750
[A].INNPYVPRT.[Y]	INNPYVPRT		P07498	P07498 [71-79]	1073.57	23.93	276299	273688
[K].DDPDAPLQPVTPLQLFEG.[R]	DDPDAPLQPVTPLQLFEG		P0C0L4	P0C0L5 [1429-1446]	1951.96	52.04	276168	193038
[A].QPAVVLPVPQPEIM.[E]	QPAVVLPVPQPEIM		P05814	P05814 [86-99]	1517.84	49.65	274878	190187
[P].LLQPLMQQVPQPIP.[Q]	LLQPLMQQVPQPIP	1xOxidation [M6]	P05814	P05814 [145-158]	1617.9	46.85	274060	146176
[T].YYANPAVVRPHAQIPQR.[Q]	YYANPAVVRPHAQIPQR		P07498	P07498 [80-96]	1980.06	23.87	273596	256347
[P].LLQPLMQQVPQPIPQTLALPPQPLWSVPQP.[K]	LLQPLMQQVPQPIPQTLALPPQPLWSVPQP		P05814	P05814 [145-174]	3354.86	44.07	273433	219365
[A].VVLPVPQPEIMEVPKAKDTVYTK.[G]	VVLPVPQPEIMEVPKAKDTVYTK	1xOxidation [M11]	P05814	P05814 [89-111]	2597.43	37.92	273360	119169
[L].MQQVPQPIPQT.[L]	MQQVPQPIPQT	1xOxidation [M1]	P05814	P05814 [150-160]	1282.65	24.85	272882	162424
[K].AVADTRDQADGSRASVDSGSSEEQG.[G]	AVADTRDQADGSRASVDSGSSEEQG		P01833	P01833 [610-634]	2495.09	13.17	272763	75531
[P].THQIYPVTQPLAPVHNP.[I]	THQIYPVTQPLAPVHNP		P05814	P05814 [207-223]	1912.01	22.57	272358	220343
[L].ALPPQPLWSVPQP.[K]	ALPPQPLWSVPQP		P05814	P05814 [162-174]	1429.78	40.83	272343	158976
[L].AQPAVVLPVPQPE.[I]	AQPAVVLPVPQPE		P05814	P05814 [85-97]	1344.75	42.2	270852	156729
[A].RETIESLSSSEESITEYKQ.[K]	RETIESLSSSEESITEYKQ	2xPhospho [S]	P05814	P05814 [16-34]	2375.99	24.35	269799	65147.7
[F].DPQIPKLTDLENLH.[L]	DPQIPKLTDLENLH		P05814	P05814 [127-140]	1632.86	46.26	267342	168463
[A].IQDPRLFAEEKAVADT.[R]	IQDPRLFAEEKAVADT		P01833	P01833 [599-614]	1802.93	24.47	266353	163840
[N].ILPLAQPAVVLPVPQPEIME.[V]	ILPLAQPAVVLPVPQPEIME	1xOxidation [M19]	P05814	P05814 [81-100]	2170.22	50.64	265903	211290
[P].AVVLPVPQPEIMEVPKAKDTVYT.[K]	AVVLPVPQPEIMEVPKAKDTVYT	1xOxidation [M12]	P05814	P05814 [88-110]	2540.37	44.6	264007	74623.6
[L].ESREEYMNGMN.[R]	ESREEYMNGMN		P47710	P47710 [40-50]	1359.53	12.83	262097	77713.7
[A].RETIESLSSSEESITEYKQKVEKV.[K]	RETIESLSSSEESITEYKQKVEKV	2xPhospho [S9; S]	P05814	P05814 [16-39]	2959.36	35.47	261919	162901
[L].LLNQELLLNPTHQIYPVTQPLAPV.[H]	LLNQELLLNPTHQIYPVTQPLAPV		P05814	P05814 [197-220]	2711.51	42.18	261724	232904
[P].THQIYPVTQPL.[A]	THQIYPVTQPL		P05814	P05814 [207-217]	1296.69	31.65	261665	76266.6
[V].VLPVPQPEIMEVPK.[A]	VLPVPQPEIMEVPK	1xOxidation [M10]	P05814	P05814 [90-103]	1591.88	29.01	260853	123329
[D].IQYPDATDEDITSHMESEELNGAY.[K]	IQYPDATDEDITSHMESEELNGAY		P10451	P10451 [179-202]	2728.16	36.71	260215	105064
[S].VPQPKVLPIPQQVVP.[Y]	VPQPKVLPIPQQVVP		P05814	P05814 [171-185]	1638.99	38.76	259754	112480
[A].QPAVVLPVPQPEIMEVPKAK.[D]	QPAVVLPVPQPEIMEVPKAK		P05814	P05814 [86-105]	2170.23	39.49	259648	227744
[F].DPQIPKLTDLENLHLPL.[P]	DPQIPKLTDLENLHLPL		P05814	P05814 [127-143]	1956.08	43.1	257352	188480
[V].LPVPQPEIMEVPKAKDTV.[Y]	LPVPQPEIMEVPKAKDTV	1xOxidation [M9]	P05814	P05814 [91-108]	2007.08	32.32	257110	189182
[K].GNPEQTPVLKPEEEAPAPEVGASKPEG.[I]	GNPEQTPVLKPEEEAPAPEVGASKPEG		P04004	P04004 [108-134]	2757.36	18.66	256896	236680
[V].SLAKADAAPDEKVLDSGF.[R]	SLAKADAAPDEKVLDSGF		P01833	P01833 [574-591]	1833.92	25.19	256129	209948
[V].SLAKADAAPDEK.[V]	SLAKADAAPDEK		P01833	P01833 [574-585]	1215.62	12.74	255647	206261
[L].MQQVPQPIPQTLALPPQP.[L]	MQQVPQPIPQTLALPPQP		P05814	P05814 [150-167]	1983.07	39.77	255462	104568
[N].ILPLAQPAVVLPVPQPEIMEVPKAKDTVYTKG.[R]	ILPLAQPAVVLPVPQPEIMEVPKAKDTVYTKG		P05814	P05814 [81-112]	3441.94	41.26	254380	254380
[R].DGREQEAEQMPEY.[R]	DGREQEAEQMPEY		Q13410	Q13410 [79-91]	1581.65	24.15	253680	69532
[N].ENSHVQVPFQ.[Q]	ENSHVQVPFQ		P47710	P47710 [128-137]	1184.57	18.53	253320	227424
[I].YPFVEPIPYG.[F]	YPFVEPIPYG		P05814	P05814 [66-75]	1181.59	48.66	253102	170458
[P].ERLQNPSESSEPIP.[L]	ERLQNPSESSEPIP		P47710	P47710 [25-38]	1582.77	24.65	252135	107315
[R].RPDIQYPDATDEDITSHMESEELNGAYK.[A]	RPDIQYPDATDEDITSHMESEELNGAYK	1xPhospho [S/T]; 1xOxidation [M18]	P10451	P10451 [176-203]	3320.39	31.82	250405	115059
[P].TIPFFDPQIP.[K]	TIPFFDPQIP		P05814	P05814 [122-131]	1174.61	43.02	250178	111443
[I].QDPRLFAEEK.[A]	QDPRLFAEEK		P01833	P01833 [600-609]	1232.63	23.02	247048	114091
[A].RETIESL.[S]	RETIESL	1xPhospho [S/T]	P05814	P05814 [16-22]	927.418	25.72	245110	112190
[P].LMQQVPQPIPQT.[L]	LMQQVPQPIPQT	1xOxidation [M2]	P05814	P05814 [149-160]	1395.73	26.57	245065	172220
[R].RMNENSHVQVPFQQLNQ.[L]	RMNENSHVQVPFQQLNQ		P47710	P47710 [125-141]	2069	22.41	244788	230694
[P].EIMEVPKAKDTVY.[T]	EIMEVPKAKDTVY	1xOxidation [M3]	P05814	P05814 [97-109]	1538.78	22.89	244113	102472
[R].GKDSYETSQLDDQSAETHSH.[K]	GKDSYETSQLDDQSAETHSH		P10451	P10451 [221-240]	2234.94	10.86	243324	181927
[K].VLPIPQQVVPYPQRAVPVQ.[A]	VLPIPQQVVPYPQRAVPVQ		P05814	P05814 [176-194]	2128.23	39.16	242376	118992
[P].IPQQVVPYPQ.[R]	IPQQVVPYPQ		P05814	P05814 [179-188]	1168.64	30.42	240823	120540
[L].NPTHQIYPVTQPLAPVHNPI.[S]	NPTHQIYPVTQPLAPVHNPI		P05814	P05814 [205-224]	2236.19	31.87	240819	194342
[K].FRISHELDSASSEVN.[-]	FRISHELDSASSEVN	1xPhospho [S]	P10451	P10451 [300-314]	1770.77	23.14	240808	103709
[I].MQYVPFPPFSDISNPTAHENYEK.[N]	MQYVPFPPFSDISNPTAHENYEK		P47710	P47710 [156-178]	2711.24	40.91	240678	228582
[D].PQIPKLTDLENLHLPLP.[L]	PQIPKLTDLENLHLPLP		P05814	P05814 [128-144]	1938.11	42.74	240457	147880
[I].YPVTQPLAPVH.[N]	YPVTQPLAPVH		P05814	P05814 [211-221]	1221.66	27.13	239269	83925.6
[A].DSGEGDFLAEGGGVR.[G]	DSGEGDFLAEGGGVR		P02671	P02671 [21-35]	1465.66	29.17	238324	155191
[A].RETIESLSSSEESITEYKQKVEKVKHEDQQQGEDEHQD.[K]	RETIESLSSSEESITEYKQKVEKVKHEDQQQGEDEHQD	2xPhospho [S]	P05814	P05814 [16-53]	4663.04	27.25	237727	93234
[P].AVVLPVPQPEIMEVPKAKDTVYTKG.[R]	AVVLPVPQPEIMEVPKAKDTVYTKG		P05814	P05814 [88-112]	2709.49	38.46	237618	97323.2
[A].EEKAVADTRDQADGSRASVDSGSSEEQGGSSRA.[L]	EEKAVADTRDQADGSRASVDSGSSEEQGGSSRA		P01833	P01833 [607-639]	3339.49	13.16	237077	54995.5
[A].RETIESLSSSEESITEYKQKVEK.[V]	RETIESLSSSEESITEYKQKVEK	3xPhospho [S9; S10; S]	P05814	P05814 [16-38]	2940.26	30.19	236883	168923
[A].DSGSSEEKQLYNKYPDAVAT.[W]	DSGSSEEKQLYNKYPDAVAT		P10451	P10451 [23-42]	2202.02	25.87	236880	162320
[V].LPIPQQVVPYPQRAVPVQ.[A]	LPIPQQVVPYPQRAVPVQ		P05814	P05814 [177-194]	2029.16	36.8	236061	124890
[L].LLNPTHQIYPVTQPLAP.[V]	LLNPTHQIYPVTQPLAP		P05814	P05814 [203-219]	1902.05	44.86	235633	120009
[Y].ANPAVVRPHAQIPQR.[Q]	ANPAVVRPHAQIPQR		P07498	P07498 [82-96]	1653.93	12.66	235310	233868
[P].QPEIMEVPKAKDTVY.[T]	QPEIMEVPKAKDTVY	1xOxidation [M5]	P05814	P05814 [95-109]	1763.89	24.33	234191	207328
[E].KVKHEDQQQGEDEHQDKIYPSFQPQP.[L]	KVKHEDQQQGEDEHQDKIYPSFQPQP		P05814	P05814 [38-63]	3135.48	24.13	234190	218569
[L].LQPLMQQVPQPIPQTLALPPQP.[L]	LQPLMQQVPQPIPQTLALPPQP		P05814	P05814 [146-167]	2434.35	41.64	233701	152866
[T].DLENLHLPLPLL.[Q]	DLENLHLPLPLL		P05814	P05814 [135-146]	1386.8	44.35	233057	125078
[V].SPAVLVHRDGREQEAEQMPEY.[R]	SPAVLVHRDGREQEAEQMPEY		Q13410	Q13410 [71-91]	2441.15	25.22	232753	127043
[N].ILPLAQPAVVLPVPQPEIMEVPKA.[K]	ILPLAQPAVVLPVPQPEIMEVPKA		P05814	P05814 [81-104]	2549.48	50.76	232688	229830
[S].EEQGGSSRALVSTLVPLG.[L]	EEQGGSSRALVSTLVPLG		P01833	P01833 [631-648]	1799.95	47.95	232644	70359.3
[I].YPFVEPIPYGFLP.[Q]	YPFVEPIPYGFLP		P05814	P05814 [66-78]	1538.79	52.61	232080	170759
[Q].PLMQQVPQPIP.[Q]	PLMQQVPQPIP		P05814	P05814 [148-158]	1247.68	33.13	231812	190186
[A].DSGEGDFLAEGGGV.[R]	DSGEGDFLAEGGGV		P02671	P02671 [21-34]	1309.55	38.14	230948	95727.6
[R].DQADGSRASVDSGSSEEQGGSSRALVSTL.[V]	DQADGSRASVDSGSSEEQGGSSRALVSTL		P01833	P01833 [616-644]	2853.31	28.71	228435	85759.1
[S].SSEESITEY.[K]	SSEESITEY	1xPhospho [S/T]	P05814	P05814 [24-32]	1124.4	26.34	227740	67304.8
[F].VEPIPYGFLPQN.[I]	VEPIPYGFLPQN		P05814	P05814 [69-80]	1373.71	47.2	227727	123752
[L].LLNPTHQIYPVT.[Q]	LLNPTHQIYPVT		P05814	P05814 [203-214]	1395.76	25.68	227488	64640.3
[E].IMEVPKAKDTVYTKG.[R]	IMEVPKAKDTVYTKG		P05814	P05814 [98-112]	1679.9	22.6	227286	100445
[G].EDEHQDKIYPSFQ.[P]	EDEHQDKIYPSFQ		P05814	P05814 [48-60]	1635.73	25.9	225947	179282
[Y].VPRTYYANPAVVRPHAQIP.[Q]	VPRTYYANPAVVRPHAQIP		P07498	P07498 [76-94]	2149.17	28.65	225156	223609
[V].VLPVPQPEIMEVPKAKDTVYTKG.[R]	VLPVPQPEIMEVPKAKDTVYTKG	1xOxidation [M10]	P05814	P05814 [90-112]	2555.38	25.03	223470	162050
[T].IPFFDPQ.[I]	IPFFDPQ		P05814	P05814 [123-129]	863.43	39.18	222822	126173
[R].AVPVQALLLNQELLLNPTHQIYPVTQPL.[A]	AVPVQALLLNQELLLNPTHQIYPVTQPL		P05814	P05814 [190-217]	3122.76	43.96	221284	77311.6
[I].SNPTAHENYEKNNVMLQW.[-]	SNPTAHENYEKNNVMLQW		P47710	P47710 [168-185]	2174.99	29.08	220638	121597
[S].DISNPTAHENYEKNN.[V]	DISNPTAHENYEKNN		P47710	P47710 [166-180]	1745.77	10.71	220601	111569
[A].RETIESLSSSEESITEY.[K]	RETIESLSSSEESITEY		P05814	P05814 [16-32]	1959.9	36.45	220493	79180.4
[V].VLPVPQPEIME.[V]	VLPVPQPEIME	1xOxidation [M10]	P05814	P05814 [90-100]	1267.66	37.13	220380	166244
[P].VPQPEIME.[V]	VPQPEIME		P05814	P05814 [93-100]	942.46	28.03	219958	104902
[R].RPDIQYPDATDEDITSHMESEELNGAYKAIP.[V]	RPDIQYPDATDEDITSHMESEELNGAYKAIP	1xPhospho [S20]	P10451	P10451 [176-206]	3585.57	39.64	219570	208290
[K].AVADTRDQADGSRASVDSGSSEEQGG.[S]	AVADTRDQADGSRASVDSGSSEEQGG		P01833	P01833 [610-635]	2552.11	13.21	218410	32284.6
[E].LLLNPTHQIYPVTQPLAP.[V]	LLLNPTHQIYPVTQPLAP		P05814	P05814 [202-219]	2015.13	40.21	217505	204906
[R].GPLVKYSSDYFQAPSD.[Y]	GPLVKYSSDYFQAPSD		Q08380	Q08380 [437-452]	1773.83	28.71	217144	188350
[L].NQELLLNPTHQIY.[P]	NQELLLNPTHQIY		P05814	P05814 [199-211]	1582.82	41.76	217096	166507
[L].PVPQPEIMEVPKAKDTVYT.[K]	PVPQPEIMEVPKAKDTVYT	1xOxidation [M8]	P05814	P05814 [92-110]	2158.11	28.52	216083	71591.2
[L].NQELLLNPTH.[Q]	NQELLLNPTH		P05814	P05814 [199-208]	1178.62	27.78	215679	44836.1
[E].DQQQGEDEHQDKIYPS.[F]	DQQQGEDEHQDKIYPS		P05814	P05814 [43-58]	1916.83	11.12	215143	97652
[R].EIENKAIQDPRLFAEEK.[A]	EIENKAIQDPRLFAEEK		P01833	P01833 [593-609]	2030.06	28.55	214154	91834.1
[S].EESITEY.[K]	EESITEY		P05814	P05814 [26-32]	870.373	15.72	213864	106255
[V].DSGSSEEQGGSSRALVST.[L]	DSGSSEEQGGSSRALVST		P01833	P01833 [626-643]	1753.78	20.5	213264	45601.3
[L].AQPAVVLPVPQPEIMEVP.[K]	AQPAVVLPVPQPEIMEVP	1xOxidation [M15]	P05814	P05814 [85-102]	1930.04	40.63	212093	131036
[A].VPVQALLLNQEL.[L]	VPVQALLLNQEL		P05814	P05814 [191-202]	1336.78	41.9	210985	102808
[G].EDEHQDKIYPSFQPQ.[P]	EDEHQDKIYPSFQPQ		P05814	P05814 [48-62]	1860.84	26.73	210412	166349
[R].DQADGSRASVDSGSSEEQGGSSRALV.[S]	DQADGSRASVDSGSSEEQGGSSRALV		P01833	P01833 [616-641]	2552.15	22.22	210268	51317.2
[A].RETIESLSSSEESITEYKQKVEKVKHEDQQQG.[E]	RETIESLSSSEESITEYKQKVEKVKHEDQQQG		P05814	P05814 [16-47]	3749.85	29.05	210039	114532
[R].VMPVLKSPTIPFFD.[P]	VMPVLKSPTIPFFD		P05814	P05814 [114-127]	1590.86	42.61	209297	149859
[P].DIQYPDATDEDITSHMESEELNGAY.[K]	DIQYPDATDEDITSHMESEELNGAY	1xOxidation [M16]	P10451	P10451 [178-202]	2859.18	37.9	209125	86402.5
[Q].ELLLNPTHQIYPVTQPLAPVHNPIS.[V]	ELLLNPTHQIYPVTQPLAPVHNPIS		P05814	P05814 [201-225]	2791.51	40.39	208867	201298
[V].SLAKADAAPDEKVLDSGFREIEN.[K]	SLAKADAAPDEKVLDSGFREIEN		P01833	P01833 [574-596]	2475.24	28.76	207621	117524
[E].SLSSSEESITEYKQKVEK.[V]	SLSSSEESITEYKQKVEK	2xPhospho [S4; S]	P05814	P05814 [21-38]	2231.97	24.96	207578	59078.3
[L].LQPLMQQVPQPIP.[Q]	LQPLMQQVPQPIP		P05814	P05814 [146-158]	1488.82	47.35	207372	113586
[L].NAPSDWDSRGKDSYETSQLDDQSAETHSH.[K]	NAPSDWDSRGKDSYETSQLDDQSAETHSH		P10451	P10451 [212-240]	3263.37	23.18	207080	121618
[P].LMQQVPQPIPQTLALPPQPLWSVPQPK.[V]	LMQQVPQPIPQTLALPPQPLWSVPQPK		P05814	P05814 [149-175]	3031.68	42.19	206780	187860
[Q].NPSESSEPIPLESREEYMNGMN.[R]	NPSESSEPIPLESREEYMNGMN	1xPhospho [S13]	P47710	P47710 [29-50]	2590.05	31.75	205321	65548.5
[N].ILPLAQPAVVLPVPQPEIMEVPKAKDTVY.[T]	ILPLAQPAVVLPVPQPEIMEVPKAKDTVY	1xOxidation [M19]	P05814	P05814 [81-109]	3171.77	49.64	205130	205130
[R].LFAEEKAVADTRDQADGSRASVDSGSSEE.[Q]	LFAEEKAVADTRDQADGSRASVDSGSSEE		P01833	P01833 [604-632]	3027.38	16.2	205092	73913.7
[R].PDIQYPDATDEDITSHMESEELNGAY.[K]	PDIQYPDATDEDITSHMESEELNGAY		P10451	P10451 [177-202]	2940.24	46.64	204435	79576.7
[R].DQADGSRASVDSGSSEEQGGSSRALVSTLVPL.[G]	DQADGSRASVDSGSSEEQGGSSRALVSTLVPL		P01833	P01833 [616-647]	3162.51	47.69	204413	78186
[S].VDSGSSEEQGGSSRALVSTLVPLG.[L]	VDSGSSEEQGGSSRALVSTLVPLG		P01833	P01833 [625-648]	2332.16	47.7	203721	52087.4
[Q].PEIMEVPK.[A]	PEIMEVPK		P05814	P05814 [96-103]	942.496	48.7	203539	137907
[K].AVADTRDQADGSRASVDSGSSEEQGGS.[S]	AVADTRDQADGSRASVDSGSSEEQGGS		P01833	P01833 [610-636]	2639.14	13.67	203448	80446.6
[R].DVSLAKADAAPDEKVLDSG.[F]	DVSLAKADAAPDEKVLDSG		P01833	P01833 [572-590]	1900.95	20.27	203445	178224
[V].VLPVPQPEIMEVPKAKDT.[V]	VLPVPQPEIMEVPKAKDT	1xOxidation [M10]	P05814	P05814 [90-107]	2007.08	32.32	203014	143972
[K].GRVMPVLKSPTIPFFDPQ.[I]	GRVMPVLKSPTIPFFDPQ		P05814	P05814 [112-129]	2029.09	49.22	202908	133337
[L].LQPLMQQVPQPIPQTL.[A]	LQPLMQQVPQPIPQTL	1xOxidation [M5]	P05814	P05814 [146-161]	1847.01	38.92	202804	138375
[P].FPPFSDISNPTAHENYEKNN.[V]	FPPFSDISNPTAHENYEKNN		P47710	P47710 [161-180]	2321.05	37.52	202581	165440
[T].DLENLHLPLPLLQP.[L]	DLENLHLPLPLLQP		P05814	P05814 [135-148]	1611.91	43.87	202432	138835
[K].HEDQQQGEDEHQDKIYPSFQPQ.[P]	HEDQQQGEDEHQDKIYPSFQPQ		P05814	P05814 [41-62]	2683.17	24.97	202046	202046
[K].TAPYVPMYYVPNSYPYYGTNLYQ.[R]	TAPYVPMYYVPNSYPYYGTNLYQ	1xOxidation [M7]	P07498	P07498 [42-64]	2780.26	48.83	201908	167645
[L].LNPTHQIYP.[V]	LNPTHQIYP		P05814	P05814 [204-212]	1082.56	24.97	200579	46459
[A].IPVKQADSGSSEEKQLYNKYPDAVAT.[W]	IPVKQADSGSSEEKQLYNKYPDAVAT	2xPhospho [S10; S11]	P10451	P10451 [17-42]	2998.35	30.63	199909	120945
[L].PVPQPEIMEVPKAKDTVYTKG.[R]	PVPQPEIMEVPKAKDTVYTKG		P05814	P05814 [92-112]	2327.23	22.43	198201	126469
[A].RETIESLSSSEESITEYKQKVEKVKHEDQQQGEDEHQD.[K]	RETIESLSSSEESITEYKQKVEKVKHEDQQQGEDEHQD		P05814	P05814 [16-53]	4503.1	28.3	197411	100011
[R].ASVDSGSSEEQGGSSRALVST.[L]	ASVDSGSSEEQGGSSRALVST		P01833	P01833 [623-643]	2010.92	21.74	195737	63570.1
[K].AIPVAQDLNAPSDWDSRGKDSYETSQL.[D]	AIPVAQDLNAPSDWDSRGKDSYETSQL	2xPhospho [S16; S21]	P10451	P10451 [204-230]	3123.33	38.75	194918	56213.2
[R].LQNPSESSEPIPLESREEYMNG.[M]	LQNPSESSEPIPLESREEYMNG	1xPhospho [S15]	P47710	P47710 [27-48]	2586.11	30.04	194604	164111
[I].NNPYVPRTYYANPAVVRPHAQIP.[Q]	NNPYVPRTYYANPAVVRPHAQIP		P07498	P07498 [72-94]	2637.37	34.9	194585	193638
[V].VLPVPQPEIMEVPKAKDT.[V]	VLPVPQPEIMEVPKAKDT		P05814	P05814 [90-107]	1991.09	33.03	194558	133700
[E].TIESLSSSEESITEY.[K]	TIESLSSSEESITEY		P05814	P05814 [18-32]	1674.76	38.79	194304	107605
[L].AQPAVVLPVPQPEIMEVPKAKDTV.[Y]	AQPAVVLPVPQPEIMEVPKAKDTV	1xOxidation [M15]	P05814	P05814 [85-108]	2572.41	45.24	193926	173980
[Q].PAVVLPVPQPEIMEVPKA.[K]	PAVVLPVPQPEIMEVPKA		P05814	P05814 [87-104]	1914.08	41.03	192802	166294
[A].LVSTLVPL.[G]	LVSTLVPL		P01833	P01833 [640-647]	841.539	49.52	191808	148508
[S].SEESITEY.[K]	SEESITEY	1xPhospho [S1]	P05814	P05814 [25-32]	1037.37	18.42	191501	79209.5
[F].VEPIPYGFLPQNILP.[L]	VEPIPYGFLPQNILP		P05814	P05814 [69-83]	1696.93	52.2	190301	174845
[K].AVADTRDQADGSRASVDSGSSEEQGGSSRALVS.[T]	AVADTRDQADGSRASVDSGSSEEQGGSSRALVS		P01833	P01833 [610-642]	3252.5	20.93	189923	52960.2
[R].LFAEEKAVADTRDQADGSRASVDSGSSEEQGGSS.[R]	LFAEEKAVADTRDQADGSRASVDSGSSEEQGGSS		P01833	P01833 [604-637]	3443.54	23.72	189555	54060.4
[V].VLPVPQPEIMEVPKAKDTVY.[T]	VLPVPQPEIMEVPKAKDTVY	1xOxidation [M10]	P05814	P05814 [90-109]	2269.21	38.76	188897	157298
[P].QPKVLPIPQQVVPYP.[Q]	QPKVLPIPQQVVPYP		P05814	P05814 [173-187]	1702.99	39.54	187924	121090
[L].NQELLLNPTHQIYPVT.[Q]	NQELLLNPTHQIYPVT		P05814	P05814 [199-214]	1879.99	46.2	187615	69701.9
[R].ETIESLSSSEESITEYKQ.[K]	ETIESLSSSEESITEYKQ		P05814	P05814 [17-34]	2059.96	34.4	187519	61965.6
[R].LQNPSESSEPIPLESREEYMNGMNR.[Q]	LQNPSESSEPIPLESREEYMNGMNR	2xPhospho [S8; S15]	P47710	P47710 [27-51]	3067.26	31.7	187234	104297
[P].LMQQVPQPIPQTLALPPQPLWSVPQP.[K]	LMQQVPQPIPQTLALPPQPLWSVPQP	1xOxidation [M2]	P05814	P05814 [149-174]	2919.58	49.71	186883	124204
[P].LAQPAVVLPVPQPEIMEVPKAKDTVY.[T]	LAQPAVVLPVPQPEIMEVPKAKDTVY	1xOxidation [M16]	P05814	P05814 [84-109]	2848.55	47.67	186496	143838
[I].MEVPKAKDTVYTKG.[R]	MEVPKAKDTVYTKG		P05814	P05814 [99-112]	1566.82	12.67	185290	154242
[L].ESREEYMNGMNRQ.[R]	ESREEYMNGMNRQ	1xPhospho [S2]	P47710	P47710 [40-52]	1723.66	12.79	184890	112467
[P].LESREEYMNGMN.[R]	LESREEYMNGMN		P47710	P47710 [39-50]	1472.61	22.99	184033	65709.4
[A].SVDSGSSEEQGGSSRALVSTLVP.[L]	SVDSGSSEEQGGSSRALVSTLVP		P01833	P01833 [624-646]	2249.09	42.11	183463	42040.8
[L].PVPQPEIMEVPKAKDTVY.[T]	PVPQPEIMEVPKAKDTVY		P05814	P05814 [92-109]	2041.07	37.27	183391	152886
[L].AKADAAPDEKVLDSGFREIEN.[K]	AKADAAPDEKVLDSGFREIEN		P01833	P01833 [576-596]	2275.12	25.28	182746	74841.3
[L].SSSEESITEYKQKVE.[K]	SSSEESITEYKQKVE		P05814	P05814 [23-37]	1743.83	22.44	182566	113848
[A].RETIESLSSSEESITEYKQK.[V]	RETIESLSSSEESITEYKQK	2xPhospho [S9; S]	P05814	P05814 [16-35]	2504.08	20.51	182156	74461
[R].RHPYFYAPELLFFAK.[R]	RHPYFYAPELLFFAK		P02768	P02768 [169-183]	1899	49.81	182147	41757.9
[V].DSGSSEEQGGSSRALVSTLV.[P]	DSGSSEEQGGSSRALVSTLV		P01833	P01833 [626-645]	1965.94	37.83	181702	55790.4
[A].VVLPVPQPEIMEVPKAKD.[T]	VVLPVPQPEIMEVPKAKD	1xOxidation [M11]	P05814	P05814 [89-106]	2005.1	30.24	181669	124751
[K].SPTIPFFDPQIPKLT.[D]	SPTIPFFDPQIPKLT		P05814	P05814 [120-134]	1700.93	50.42	180835	85119.2
[F].RISHELDSASSEVN.[-]	RISHELDSASSEVN	1xPhospho [S]	P10451	P10451 [301-314]	1623.7	22.51	180679	49843.5
[Q].TLALPPQPLWSVPQP.[K]	TLALPPQPLWSVPQP		P05814	P05814 [160-174]	1643.92	42.33	180434	117261
[K].FRISHELDSASSEVN.[-]	FRISHELDSASSEVN	2xPhospho [S4; S9]	P10451	P10451 [300-314]	1850.74	30.81	179960	72097.6
[L].LLNQELLLNPT.[H]	LLNQELLLNPT		P05814	P05814 [197-207]	1267.73	47.64	179257	60021.2
[L].AQPAVVLPVPQPEIMEVPKAKDTVYTK.[G]	AQPAVVLPVPQPEIMEVPKAKDTVYTK	1xOxidation [M15]	P05814	P05814 [85-111]	2964.61	33.61	179168	141875
[L].AQPAVVLPVPQPEIMEVPKAK.[D]	AQPAVVLPVPQPEIMEVPKAK	1xOxidation [M15]	P05814	P05814 [85-105]	2257.26	42.02	178604	152620
[L].IYPFVEPIPY.[G]	IYPFVEPIPY		P05814	P05814 [65-74]	1237.65	42.75	178073	158722
[K].DTVYTKGRVMPVLK.[S]	DTVYTKGRVMPVLK		P05814	P05814 [106-119]	1606.9	17.4	177676	120288
[P].VPQPEIMEVPKA.[K]	VPQPEIMEVPKA	1xOxidation [M7]	P05814	P05814 [93-104]	1353.71	26.2	176931	79310
[A].LPPQPLWSVPQ.[P]	LPPQPLWSVPQ		P05814	P05814 [163-173]	1261.69	47.36	176666	134017
[L].NPTHQIYPVTQP.[L]	NPTHQIYPVTQP		P05814	P05814 [205-216]	1394.71	16.72	176293	97872.7
[A].DQRRDFIDIES.[K]	DQRRDFIDIES		P06858	P06858 [29-39]	1393.67	21.66	176262	78860.1
[P].LLQPLMQQVPQPIPQ.[T]	LLQPLMQQVPQPIPQ		P05814	P05814 [145-159]	1729.97	48.07	176154	97613.9
[A].DGSRASVDSGSSEEQGGSSRALVST.[L]	DGSRASVDSGSSEEQGGSSRALVST		P01833	P01833 [619-643]	2426.1	21.22	176125	62108.4
[A].INNPYVPRTY.[Y]	INNPYVPRTY		P07498	P07498 [71-80]	1236.64	19.08	175905	171021
[A].PDEKVLDSGF.[R]	PDEKVLDSGF		P01833	P01833 [582-591]	1106.54	35.73	175690	148151
[R].LQNPSESSEPIPLESREEYMNGMNRQ.[R]	LQNPSESSEPIPLESREEYMNGMNRQ	2xPhospho [S8; S15]; 1xOxidation [M]	P47710	P47710 [27-52]	3211.31	24.46	174940	106118
[N].ILPLAQPAVVLPVPQPEIMEVPKAKDTVYT.[K]	ILPLAQPAVVLPVPQPEIMEVPKAKDTVYT	1xOxidation [M19]	P05814	P05814 [81-110]	3272.82	41.22	174317	103196
[L].NQELLLNPT.[H]	NQELLLNPT		P05814	P05814 [199-207]	1041.56	34.34	174244	102676
[R].DQADGSRASVDSGSSEEQGGSSRAL.[V]	DQADGSRASVDSGSSEEQGGSSRAL		P01833	P01833 [616-640]	2453.08	19.78	174142	35652.5
[R].ASVDSGSSEEQGGSSRALVSTLV.[P]	ASVDSGSSEEQGGSSRALVSTLV		P01833	P01833 [623-645]	2223.07	29.76	173959	51006.7
[R].YPERLQNPSE.[S]	YPERLQNPSE		P47710	P47710 [23-32]	1232.59	12.83	173810	65187
[K].GRVMPVLKSPTIPFFDPQIPKLTDLEN.[L]	GRVMPVLKSPTIPFFDPQIPKLTDLEN		P05814	P05814 [112-138]	3052.65	42.24	173803	142250
[T].IESLSSSEESITEYKQKVE.[K]	IESLSSSEESITEYKQKVE		P05814	P05814 [19-37]	2186.07	23.48	173801	136045
[D].SGSSEEQGGSSRALVSTLVPLG.[L]	SGSSEEQGGSSRALVSTLVPLG		P01833	P01833 [627-648]	2118.07	39.4	173136	64686.7
[V].AQDLNAPSDWDSRGKDSYETSQLDDQSAETHSHKQS.[R]	AQDLNAPSDWDSRGKDSYETSQLDDQSAETHSHKQS		P10451	P10451 [208-243]	4033.77	24.13	172774	170135
[Q].IPKLTDLENLHL.[P]	IPKLTDLENLHL		P05814	P05814 [130-141]	1405.8	48.87	172769	166562
[R].SLMPFSPYEPLN.[F]	SLMPFSPYEPLN		P10909	P10909 [228-239]	1394.67	41.77	172280	172280
[V].PQPEIMEVPKAKDTVYTK.[G]	PQPEIMEVPKAKDTVYTK		P05814	P05814 [94-111]	2074.09	39.68	171404	171404
[L].PIPQQVVPYP.[Q]	PIPQQVVPYP		P05814	P05814 [178-187]	1137.63	38.61	170924	139983
[Q].IPKLTDLENLH.[L]	IPKLTDLENLH		P05814	P05814 [130-140]	1292.72	39.16	170164	132208
[K].AIPVAQDLNAPSDWDSRGKDSYETSQLDDQSAETHSHKQSRLY.[K]	AIPVAQDLNAPSDWDSRGKDSYETSQLDDQSAETHSHKQSRLY		P10451	P10451 [204-246]	4846.26	27.17	170051	72833.7
[I].YPVTQPLAPVHNPIS.[V]	YPVTQPLAPVHNPIS		P05814	P05814 [211-225]	1632.87	27.87	169382	82764.2
[H].QDKIYPSFQPQP.[L]	QDKIYPSFQPQP		P05814	P05814 [52-63]	1447.72	30.1	168766	90324.5
[L].LNQELLLNPTHQIYP.[V]	LNQELLLNPTHQIYP		P05814	P05814 [198-212]	1792.96	39.45	168691	127393
[Q].QVPQPIPQTLALPPQP.[L]	QVPQPIPQTLALPPQP		P05814	P05814 [152-167]	1723.97	39.5	168239	63252
[K].AIQDPRLFAEEKAVADTRDQAD.[G]	AIQDPRLFAEEKAVADTRDQAD		P01833	P01833 [598-619]	2459.22	31.07	167340	28683
[L].LNQELLLNPTHQIYPVTQPLAP.[V]	LNQELLLNPTHQIYPVTQPLAP		P05814	P05814 [198-219]	2499.36	41.77	167246	81553.3
[L].LNQELLLNPTHQIYPVTQPLAPVHNPIS.[V]	LNQELLLNPTHQIYPVTQPLAPVHNPIS		P05814	P05814 [198-225]	3146.7	40.44	167151	107088
[K].VLPIPQQVVPYPQRA.[V]	VLPIPQQVVPYPQRA		P05814	P05814 [176-190]	1704.98	43.84	166865	66708.4
[A].PDEKVLDSGFR.[E]	PDEKVLDSGFR		P01833	P01833 [582-592]	1262.64	30.44	166099	148541
[V].PQPEIMEVPKA.[K]	PQPEIMEVPKA		P05814	P05814 [94-104]	1238.64	40.95	165597	122215
[K].AIPVAQDLNAPSDWDSRGKDSYETSQLDDQSAETHSHKQSRLY.[K]	AIPVAQDLNAPSDWDSRGKDSYETSQLDDQSAETHSHKQSRLY	1xPhospho [S21]	P10451	P10451 [204-246]	4926.22	36.42	165564	73879.8
[E].LLLNPTHQIYPV.[T]	LLLNPTHQIYPV		P05814	P05814 [202-213]	1407.8	46.12	165480	160296
[R].RPAIAINNPYVPRTYY.[A]	RPAIAINNPYVPRTYY		P07498	P07498 [66-81]	1908.01	29.68	165173	115847
[L].MQQVPQPIP.[Q]	MQQVPQPIP	1xOxidation [M1]	P05814	P05814 [150-158]	1053.54	26.5	165002	66866.4
[T].IESLSSSEESITEY.[K]	IESLSSSEESITEY		P05814	P05814 [19-32]	1573.71	28.13	164771	63569.2
[V].VLPVPQPEIMEVPKA.[K]	VLPVPQPEIMEVPKA	1xOxidation [M10]	P05814	P05814 [90-104]	1662.91	31.09	164292	97600.2
[L].WSVPQPKVLPIPQQVVPYPQ.[R]	WSVPQPKVLPIPQQVVPYPQ		P05814	P05814 [169-188]	2300.28	41.18	163484	106741
[L].LQPLMQQVPQPIPQTLALPPQP.[L]	LQPLMQQVPQPIPQTLALPPQP	1xOxidation [M5]	P05814	P05814 [146-167]	2450.35	40.67	163355	80247.7
[V].LPVPQPEIMEVPKAKDTVYTKG.[R]	LPVPQPEIMEVPKAKDTVYTKG		P05814	P05814 [91-112]	2440.32	37.42	163343	129612
[F].EDLSDEAERDEYE.[L]	EDLSDEAERDEYE		P02788	P02788 [235-247]	1599.63	23.2	162692	30538.1
[T].LALPPQPLWSVPQPK.[V]	LALPPQPLWSVPQPK		P05814	P05814 [161-175]	1670.96	48.37	162507	126018
[L].FAEEKAVADT.[R]	FAEEKAVADT		P01833	P01833 [605-614]	1080.52	19.9	162294	73829.6
[L].YQRRPAIAINNPYVP.[R]	YQRRPAIAINNPYVP		P07498	P07498 [63-77]	1771.96	25.8	162279	160198
[A].FLVGSAKPVAQPVAA.[L]	FLVGSAKPVAQPVAA		Q96QR1	Q96QR1 [21-35]	1454.84	30.61	162198	123509
[P].VLKSPTIPFFDPQIP.[K]	VLKSPTIPFFDPQIP		P05814	P05814 [117-131]	1698.95	42.54	162130	78732.2
[V].PQPKVLPIPQQVVPYP.[Q]	PQPKVLPIPQQVVPYP		P05814	P05814 [172-187]	1800.04	47.7	161601	161601
[S].DISNPTAHENYEKNNVM.[L]	DISNPTAHENYEKNNVM		P47710	P47710 [166-182]	1975.88	15.79	160350	100403
[Y].VNKEIQNAVNGVKQ.[I]	VNKEIQNAVNGVKQ		P10909	P10909 [42-55]	1540.84	14.22	159757	127669
[L].SSSEESITEYK.[Q]	SSSEESITEYK	1xPhospho [S]	P05814	P05814 [23-33]	1339.53	22.26	159678	58805.1
[M].DPSKPSSNVAGVVIIV.[I]	DPSKPSSNVAGVVIIV		P22897	P22897 [1380-1395]	1581.88	46.95	158450	60989.8
[R].ETIESLSSSEESITEYKQKVEK.[V]	ETIESLSSSEESITEYKQKVEK	1xPhospho [T/S]	P05814	P05814 [17-38]	2624.22	28.74	157161	51103.7
[Q].PAVVLPVPQPEIMEVPK.[A]	PAVVLPVPQPEIMEVPK	1xOxidation [M13]	P05814	P05814 [87-103]	1859.03	38.69	156437	103388
[L].SSSEESITEYKQKVEKV.[K]	SSSEESITEYKQKVEKV		P05814	P05814 [23-39]	1970.99	24.37	156258	149425
[T].APYVPMYYVPNSYPYYGTNLYQ.[R]	APYVPMYYVPNSYPYYGTNLYQ		P07498	P07498 [43-64]	2663.22	42.01	156067	127142
[I].YPFVEPIPYGF.[L]	YPFVEPIPYGF		P05814	P05814 [66-76]	1328.66	43.32	154675	69028.9
[L].AQPAVVLPVPQPEIME.[V]	AQPAVVLPVPQPEIME	1xOxidation [M15]	P05814	P05814 [85-100]	1733.91	47.53	154651	61994.2
[Q].LNQLAAYPYA.[V]	LNQLAAYPYA		P47710	P47710 [139-148]	1123.58	35.35	154494	135380
[R].ALVSTLVP.[L]	ALVSTLVP		P01833	P01833 [639-646]	799.492	35.82	154444	114710
[V].LPIPQQVVPYPQRAV.[P]	LPIPQQVVPYPQRAV		P05814	P05814 [177-191]	1704.98	43.84	154197	76102.7
[A].LVSTLVP.[L]	LVSTLVP		P01833	P01833 [640-646]	728.455	27.8	153853	131581
[A].VADTRDQADGSRASVDSGSSEEQGGSSRALVST.[L]	VADTRDQADGSRASVDSGSSEEQGGSSRALVST		P01833	P01833 [611-643]	3282.51	13.12	153784	42130.4
[N].ILPLAQPAVVLPVPQPEIME.[V]	ILPLAQPAVVLPVPQPEIME		P05814	P05814 [81-100]	2154.22	51.44	153714	94958.4
[T].IESLSSSEESITEYKQKVE.[K]	IESLSSSEESITEYKQKVE	1xPhospho [S]	P05814	P05814 [19-37]	2266.04	21.58	153687	49614.1
[L].LNQELLLNPTHQIYPVTQPLAPV.[H]	LNQELLLNPTHQIYPVTQPLAPV		P05814	P05814 [198-220]	2598.43	41.44	153676	138574
[P].QPEIMEVPKAKDT.[V]	QPEIMEVPKAKDT	1xOxidation [M5]	P05814	P05814 [95-107]	1501.76	12.03	152983	112340
[A].DQRRDFIDIESK.[F]	DQRRDFIDIESK		P06858	P06858 [29-40]	1521.77	17.18	152457	92808.5
[L].PIPQQVVPYPQRAVPVQA.[L]	PIPQQVVPYPQRAVPVQA		P05814	P05814 [178-195]	1987.11	30.05	151197	105736
[S].DISNPTAHENYEKNNVMLQW.[-]	DISNPTAHENYEKNNVMLQW		P47710	P47710 [166-185]	2403.1	43.71	150619	84848.5
[R].ISHELDSASSEVN.[-]	ISHELDSASSEVN	1xPhospho [S]	P10451	P10451 [302-314]	1467.6	21.09	150486	59004.6
[P].AVVLPVPQPEIMEVPKAKDTVY.[T]	AVVLPVPQPEIMEVPKAKDTVY		P05814	P05814 [88-109]	2423.33	48.11	149419	94916.6
[N].ILPLAQPAVVLPVPQPEIMEVPKAKDTVYTKG.[R]	ILPLAQPAVVLPVPQPEIMEVPKAKDTVYTKG	1xOxidation [M19]	P05814	P05814 [81-112]	3457.94	40.32	149311	146266
[R].EEYMNGMN.[R]	EEYMNGMN		P47710	P47710 [43-50]	987.355	14.21	148688	140274
[L].AQPAVVLPVPQP.[E]	AQPAVVLPVPQP		P05814	P05814 [85-96]	1215.71	37.19	148329	85917.4
[A].DAAPDEKVL.[D]	DAAPDEKVL		P01833	P01833 [579-587]	957.489	22.95	148138	112106
[K].VLDSGFREIENKAIQDPR.[L]	VLDSGFREIENKAIQDPR		P01833	P01833 [586-603]	2087.09	24.95	147401	84954.3
[R].VMPVLKSPTIPFFDPQIPKLTDLENLHLPLP.[L]	VMPVLKSPTIPFFDPQIPKLTDLENLHLPLP	1xOxidation [M2]	P05814	P05814 [114-144]	3525.94	44.17	147263	147263
[Q].VPFQQLNQ.[L]	VPFQQLNQ		P47710	P47710 [134-141]	973.51	26.88	147235	141008
[V].DSGSSEEQGGSSRALV.[S]	DSGSSEEQGGSSRALV		P01833	P01833 [626-641]	1565.7	20.55	146490	32347.2
[E].SSEPIPLESREEYMNGMN.[R]	SSEPIPLESREEYMNGMN	1xPhospho [S9]	P47710	P47710 [33-50]	2162.88	31.6	146000	59770.3
[R].LNEYNQLQLQAAHAQEQI.[R]	LNEYNQLQLQAAHAQEQI		P47710	P47710 [106-123]	2111.05	38.79	145347	101634
[F].SDISNPTAHENYE.[K]	SDISNPTAHENYE		P47710	P47710 [165-177]	1476.62	13	144747	106291
[S].APFDVIGPPEP.[I]	APFDVIGPPEP		Q13410	Q13410 [27-37]	1138.58	46.08	144303	91316.2
[R].DGREQEAEQMPEY.[R]	DGREQEAEQMPEY	1xOxidation [M10]	Q13410	Q13410 [79-91]	1597.64	19.47	143843	48739.2
[L].LNPTHQIYPVTQPLAPVHNP.[I]	LNPTHQIYPVTQPLAPVHNP		P05814	P05814 [204-223]	2236.19	26.87	143704	103906
[S].KEIPLSPMGEDSAPRDADTLHSKLIPTQPSQGAP.[-]	KEIPLSPMGEDSAPRDADTLHSKLIPTQPSQGAP		Q13410	Q13410 [493-526]	3583.81	29.64	142974	102624
[R].AVPVQALLLNQEL.[L]	AVPVQALLLNQEL		P05814	P05814 [190-202]	1407.82	42.52	142822	68583.1
[K].NNVMLQW.[-]	NNVMLQW	1xOxidation [M4]	P47710	P47710 [179-185]	920.429	38.26	142718	105079
[Q].DPRLFAEEKAVADTRDQA.[D]	DPRLFAEEKAVADTRDQA		P01833	P01833 [601-618]	2032.01	27.42	142047	76075.9
[P].DIQYPDATDEDITSHMESEELNGAY.[K]	DIQYPDATDEDITSHMESEELNGAY	1xPhospho [S]; 1xOxidation [M16]	P10451	P10451 [178-202]	2939.14	40.93	141711	65045
[A].IPVKQADSGSSEEKQLYNKYPDAVATWLNPDPSQKQN.[L]	IPVKQADSGSSEEKQLYNKYPDAVATWLNPDPSQKQN	3xPhospho [S8; S10; S11]	P10451	P10451 [17-53]	4385.94	40.43	141679	92271
[Y].PFVEPIPYGFLPQN.[I]	PFVEPIPYGFLPQN		P05814	P05814 [67-80]	1617.83	42.8	141674	141674
[P].AVVLPVPQPEIMEVPKAKDTVYTK.[G]	AVVLPVPQPEIMEVPKAKDTVYTK		P05814	P05814 [88-111]	2652.47	38.61	141606	93558.1
[Q].NPSESSEPIPLESREEYMNGMN.[R]	NPSESSEPIPLESREEYMNGMN		P47710	P47710 [29-50]	2510.08	28.21	141389	43703.6
[K].DTVYTKGRVMPVL.[K]	DTVYTKGRVMPVL	1xOxidation [M10]	P05814	P05814 [106-118]	1494.8	26.36	141193	105687
[R].ELDESLQVAER.[L]	ELDESLQVAER		P10909	P10909 [326-336]	1288.64	17.45	141048	113544
[K].LTDLENLHLPLPLLQP.[L]	LTDLENLHLPLPLLQP		P05814	P05814 [133-148]	1826.04	43.91	140987	84140.2
[T].EGGFVEGVNK.[K]	EGGFVEGVNK		P19835	P19835 [29-38]	1035.51	13.16	140931	83682
[V].LPIPQQVVPYPQRA.[V]	LPIPQQVVPYPQRA		P05814	P05814 [177-190]	1605.91	31.69	140390	56455.3
[K].LPLRYPERLQNPSESSEPIPLE.[S]	LPLRYPERLQNPSESSEPIPLE		P47710	P47710 [19-40]	2564.34	42.5	139702	44992.2
[S].SEESITEY.[K]	SEESITEY		P05814	P05814 [25-32]	957.405	24.02	139672	46943.3
[A].IQDPRLFAEEK.[A]	IQDPRLFAEEK		P01833	P01833 [599-609]	1345.71	26.7	138855	95931.9
[N].ILPLAQPAVVLPVPQPEI.[M]	ILPLAQPAVVLPVPQPEI		P05814	P05814 [81-98]	1894.14	51.3	138355	134287
[P].LMQQVPQPIPQTLALPPQP.[L]	LMQQVPQPIPQTLALPPQP	1xOxidation [M2]	P05814	P05814 [149-167]	2112.15	39.63	137791	62729.7
[N].ILPLAQPAVVLPVPQPEIMEVP.[K]	ILPLAQPAVVLPVPQPEIMEVP	1xOxidation [M19]	P05814	P05814 [81-102]	2366.34	43.02	137708	64825.6
[A].QPAVVLPVPQPEIMEVPKA.[K]	QPAVVLPVPQPEIMEVPKA		P05814	P05814 [86-104]	2042.14	48.88	137453	80652.1
[S].LAKADAAPDEKVLDSGFREIEN.[K]	LAKADAAPDEKVLDSGFREIEN		P01833	P01833 [575-596]	2388.2	27.21	137401	74174.3
[V].QALLLNQELLLNPTHQIYPV.[T]	QALLLNQELLLNPTHQIYPV		P05814	P05814 [194-213]	2317.29	42.12	136831	83619.4
[N].PTHQIYPVTQPLAPVHNPIS.[V]	PTHQIYPVTQPLAPVHNPIS		P05814	P05814 [206-225]	2209.18	30.07	136653	112602
[P].LIYPFVEPIP.[Y]	LIYPFVEPIP		P05814	P05814 [64-73]	1187.67	43.33	136014	77226.5
[R].ETIESLSSSEESITEYK.[Q]	ETIESLSSSEESITEYK	2xPhospho [S]	P05814	P05814 [17-33]	2091.83	30.75	135984	42558.5
[K].TAPYVPMYYVPNSYPYYGTNLYQR.[R]	TAPYVPMYYVPNSYPYYGTNLYQR		P07498	P07498 [42-65]	2920.37	42.35	135852	134681
[K].AIQDPRLFAE.[E]	AIQDPRLFAE		P01833	P01833 [598-607]	1159.61	24.57	135848	54975.6
[P].LIYPFVEPIPYGFLPQNILP.[L]	LIYPFVEPIPYGFLPQNILP		P05814	P05814 [64-83]	2330.28	45.71	135342	88670.1
[Q].QVPQPIPQTL.[A]	QVPQPIPQTL		P05814	P05814 [152-161]	1120.64	35.58	134912	57492.3
[F].SDISNPTAHENYEKNNVMLQW.[-]	SDISNPTAHENYEKNNVMLQW		P47710	P47710 [165-185]	2490.14	41.43	134767	43444.4
[T].APYVPMYYVPNS.[Y]	APYVPMYYVPNS		P07498	P07498 [43-54]	1400.66	36.7	134717	115659
[G].DQTVSDNELQE.[M]	DQTVSDNELQE		P10909	P10909 [23-33]	1277.55	14.15	134311	127814
[P].LMQQVPQPIP.[Q]	LMQQVPQPIP		P05814	P05814 [149-158]	1150.63	35	133986	72067.1
[R].RPDIQYPDATDEDITSHMESEELNGA.[Y]	RPDIQYPDATDEDITSHMESEELNGA		P10451	P10451 [176-201]	2933.27	31.52	133830	39726.5
[L].SSSEESITEYKQKVEK.[V]	SSSEESITEYKQKVEK	1xPhospho [S3]	P05814	P05814 [23-38]	1951.89	22.62	133189	89913
[V].EPIPYGF.[L]	EPIPYGF		P05814	P05814 [70-76]	822.403	34.72	133023	92150.9
[L].AQPAVVLPVPQPEIMEVPKAKDTVYTKG.[R]	AQPAVVLPVPQPEIMEVPKAKDTVYTKG	1xOxidation [M15]	P05814	P05814 [85-112]	3021.63	41.49	132537	83919.1
[A].VVLPVPQP.[E]	VVLPVPQP		P05814	P05814 [89-96]	848.524	39.23	131879	54220.3
[A].RETIESLSSSEESITEYKQKV.[E]	RETIESLSSSEESITEYKQKV	2xPhospho [S]	P05814	P05814 [16-36]	2603.15	33.92	131748	41429.9
[E].RLQNPSESSEPIPLESREEYMNGMN.[R]	RLQNPSESSEPIPLESREEYMNGMN	2xPhospho [S9; S16]; 2xOxidation [M21; M24]	P47710	P47710 [26-50]	3099.25	21.87	131714	73973.9
[R].DLSRLPQLVGVSTPLQGGSNSAAAIGQSSGEL.[R]	DLSRLPQLVGVSTPLQGGSNSAAAIGQSSGEL		P15291	P15291 [46-77]	3109.61	41.26	131293	61213
[F].FDPQIPKLTDL.[E]	FDPQIPKLTDL		P05814	P05814 [126-136]	1286.7	40.57	131129	54116.4
[S].LSSSEESITEYK.[Q]	LSSSEESITEYK		P05814	P05814 [22-33]	1372.65	23.09	131073	55659.4
[K].QKVEKVKHEDQQQGEDEHQDKIYP.[S]	QKVEKVKHEDQQQGEDEHQDKIYP		P05814	P05814 [34-57]	2935.42	13.32	130767	49946.5
[D].LNAPSDWDSRGKDSYETSQLDDQSAETHSHK.[Q]	LNAPSDWDSRGKDSYETSQLDDQSAETHSHK	2xPhospho [S9; S14]	P10451	P10451 [211-241]	3664.49	25.1	130173	117337
[R].RPDIQYPDATD.[E]	RPDIQYPDATD		P10451	P10451 [176-186]	1290.6	23.19	129612	45696.2
[L].LLNPTHQIYPVTQP.[L]	LLNPTHQIYPVTQP		P05814	P05814 [203-216]	1620.87	26.9	129388	53225.5
[A].INNPYVPRTYYANPAVVRPHAQ.[I]	INNPYVPRTYYANPAVVRPHAQ		P07498	P07498 [71-92]	2540.32	22.32	129198	129198
[R].ESTVFEDLSDEAER.[D]	ESTVFEDLSDEAER		P02788	P02788 [230-243]	1626.71	40.88	129040	16378
[E].HQDKIYPSFQPQP.[L]	HQDKIYPSFQPQP		P05814	P05814 [51-63]	1584.78	26.8	128963	89710.2
[K].YVNKEIQNAVNGVK.[Q]	YVNKEIQNAVNGVK		P10909	P10909 [41-54]	1575.85	17.35	128878	128878
[A].QPAVVLPVPQPEIMEVPKA.[K]	QPAVVLPVPQPEIMEVPKA	1xOxidation [M14]	P05814	P05814 [86-104]	2058.13	47.19	128681	117869
[Q].DPRLFAEEKAVA.[D]	DPRLFAEEKAVA		P01833	P01833 [601-612]	1345.71	27.7	128511	43250.8
[R].YPERLQNPSESSEPIPL.[E]	YPERLQNPSESSEPIPL	1xPhospho [S11]	P47710	P47710 [23-39]	2035.94	33.9	128131	71700.3
[K].AIQDPRLFAEEKAVADTRDQADGSRASVDSGSSEEQGGSSRA.[L]	AIQDPRLFAEEKAVADTRDQADGSRASVDSGSSEEQGGSSRA		P01833	P01833 [598-639]	4351.04	28.48	128065	52332.8
[T].IPFFDPQIPKLT.[D]	IPFFDPQIPKLT		P05814	P05814 [123-134]	1415.79	41.98	127992	49990.5
[K].GRVMPVLKSPTIPF.[F]	GRVMPVLKSPTIPF	1xOxidation [M4]	P05814	P05814 [112-125]	1557.88	34.12	127692	110108
[P].VPQPEIME.[V]	VPQPEIME	1xOxidation [M7]	P05814	P05814 [93-100]	958.455	23.54	127619	86150.3
[R].LQNPSESSEPIPLESREEYMNGMN.[R]	LQNPSESSEPIPLESREEYMNGMN	2xOxidation [M20; M23]	P47710	P47710 [27-50]	2783.21	29.3	127346	68200.7
[R].LQNPSESSEPIPL.[E]	LQNPSESSEPIPL		P47710	P47710 [27-39]	1410.71	30.18	127346	58369.5
[S].ESSEPIPLESREEYMNGMN.[R]	ESSEPIPLESREEYMNGMN	1xPhospho [S]	P47710	P47710 [32-50]	2291.92	39.83	126533	28372.2
[H].VQVPFQQ.[L]	VQVPFQQ		P47710	P47710 [132-138]	845.452	28.27	126099	121840
[T].YYANPAVVRPHAQ.[I]	YYANPAVVRPHAQ		P07498	P07498 [80-92]	1485.76	23.81	125643	125643
[K].TTLTGLRPGTEYGIGVSAVKEDKESNPAT.[I]	TTLTGLRPGTEYGIGVSAVKEDKESNPAT		P24821	P24821 [950-978]	2991.53	33.38	125467	119797
[Q].VVPYPQRAVPVQA.[L]	VVPYPQRAVPVQA		P05814	P05814 [183-195]	1423.81	27.46	125424	65934.1
[Q].NPSESSEPIPLESREEYMNGMN.[R]	NPSESSEPIPLESREEYMNGMN	2xPhospho [S6; S13]	P47710	P47710 [29-50]	2670.01	43.1	125327	66148.2
[K].SPTIPFF.[D]	SPTIPFF		P05814	P05814 [120-126]	808.424	42.57	124604	64906.3
[Q].ELLLNPTHQIYPVTQP.[L]	ELLLNPTHQIYPVTQP		P05814	P05814 [201-216]	1863	46.58	124507	51090.2
[Y].GFLPQNILPLAQPAVVLPVPQPEIMEVPK.[A]	GFLPQNILPLAQPAVVLPVPQPEIMEVPK		P05814	P05814 [75-103]	3134.77	44.17	124388	91249.8
[P].QPEIMEVPKA.[K]	QPEIMEVPKA		P05814	P05814 [95-104]	1141.59	28.61	124298	55804.1
[P].THQIYPVTQPLAPVHNPIS.[V]	THQIYPVTQPLAPVHNPIS		P05814	P05814 [207-225]	2112.12	29.6	123550	83124
[R].VMPVLKSPTIPFFD.[P]	VMPVLKSPTIPFFD	1xOxidation [M2]	P05814	P05814 [114-127]	1606.85	41.85	123287	61055.9
[R].ASVDSGSSEEQGGSSRALVSTLVPL.[G]	ASVDSGSSEEQGGSSRALVSTLVPL		P01833	P01833 [623-647]	2433.21	48.41	123267	88359.3
[T].IESLSSSEESITEY.[K]	IESLSSSEESITEY	1xPhospho [S/T]	P05814	P05814 [19-32]	1653.68	29.78	123042	42298.9
[Y].VPNSYPYYGTNL.[Y]	VPNSYPYYGTNL		P07498	P07498 [51-62]	1387.65	29.1	123036	60021.2
[Y].VPRTYYANPAVVRPHAQIPQ.[R]	VPRTYYANPAVVRPHAQIPQ		P07498	P07498 [76-95]	2277.23	18.48	123013	123013
[Y].VPFPPFSDISNPTAHEN.[Y]	VPFPPFSDISNPTAHEN		P47710	P47710 [159-175]	1868.88	39.62	122451	93569.5
[A].DTRDQADGSRASVDSGSSEEQGGSSRAL.[V]	DTRDQADGSRASVDSGSSEEQGGSSRAL		P01833	P01833 [613-640]	2825.25	19.47	122348	72019.1
[K].AIPVAQDLNAPSDWDSRGKDSYETSQLDDQSAETHSH.[K]	AIPVAQDLNAPSDWDSRGKDSYETSQLDDQSAETHSH		P10451	P10451 [204-240]	4070.82	35.83	121844	74555.4
[T].IESLSSSEESITEYKQKVEK.[V]	IESLSSSEESITEYKQKVEK		P05814	P05814 [19-38]	2314.17	28.7	121818	57344.1
[L].AQPAVVLPVPQPEIMEVPKAKD.[T]	AQPAVVLPVPQPEIMEVPKAKD		P05814	P05814 [85-106]	2356.29	47.51	121805	71816.5
[L].FAEEKAVADTRDQADGSRASVDSGSSEEQGGSSRAL.[V]	FAEEKAVADTRDQADGSRASVDSGSSEEQGGSSRAL		P01833	P01833 [605-640]	3670.68	23	121442	35728.9
[D].IQYPDATDEDITSHMESEELNGAY.[K]	IQYPDATDEDITSHMESEELNGAY	1xOxidation [M15]	P10451	P10451 [179-202]	2744.15	35.59	121344	66544.1
[Y].PVTQPLAPVH.[N]	PVTQPLAPVH		P05814	P05814 [212-221]	1058.6	23.09	121203	50265.4
[E].SLSSSEESITEY.[K]	SLSSSEESITEY		P05814	P05814 [21-32]	1331.58	29.47	120989	70010.5
[E].EKAVADTRDQADGSRASVDSGSSEEQGGSS.[R]	EKAVADTRDQADGSRASVDSGSSEEQGGSS		P01833	P01833 [608-637]	2983.31	4.89	120379	36368.2
[M].ASVAVDPQPSVVT.[R]	ASVAVDPQPSVVT	1xAcetyl [N-Term]	Q99541	Q99541 [2-14]	1311.68	35	120303	26351
[N].DERPFYQ.[K]	DERPFYQ		P07498	P07498 [34-40]	954.432	22.86	119781	62954.6
[V].VLPVPQPEIMEVP.[K]	VLPVPQPEIMEVP		P05814	P05814 [90-102]	1447.79	49.39	119573	107638
[I].MQYVPFPPFSDISNPTAHENYE.[K]	MQYVPFPPFSDISNPTAHENYE		P47710	P47710 [156-177]	2583.15	42.06	118991	112977
[R].YPERLQNPSESSEPIPLESREEYMNGMN.[R]	YPERLQNPSESSEPIPLESREEYMNGMN	2xPhospho [S12; S19]	P47710	P47710 [23-50]	3456.42	43.35	118933	74991.8
[V].MPVLKSPTIPF.[F]	MPVLKSPTIPF		P05814	P05814 [115-125]	1229.7	40.3	118897	73732.8
[S].PTIPFFDPQIPKLTDLEN.[L]	PTIPFFDPQIPKLTDLEN		P05814	P05814 [121-138]	2085.09	42.96	118774	117449
[R].ETIESLSSSEESITEYKQKVEK.[V]	ETIESLSSSEESITEYKQKVEK	2xPhospho [S8; S9]	P05814	P05814 [17-38]	2704.19	31.47	118346	46928.2
[L].NQELLLNPTHQIYPVTQPLAPVHN.[P]	NQELLLNPTHQIYPVTQPLAPVHN		P05814	P05814 [199-222]	2736.45	47.29	118243	65667.9
[A].DAAPDEKVLDSG.[F]	DAAPDEKVLDSG		P01833	P01833 [579-590]	1216.57	14.62	118008	89194
[Y].VPFPPFSDISNPTAHENYEKNN.[V]	VPFPPFSDISNPTAHENYEKNN		P47710	P47710 [159-180]	2517.17	45.2	116720	106948
[R].ETIESLSSSEESITE.[Y]	ETIESLSSSEESITE		P05814	P05814 [17-31]	1640.74	33.83	116373	51346.1
[L].LLNPTHQIYPV.[T]	LLNPTHQIYPV		P05814	P05814 [203-213]	1294.72	28.02	116122	48789.2
[L].RYPERLQNPSESSEPIPLESREEYMNGMN.[R]	RYPERLQNPSESSEPIPLESREEYMNGMN	1xPhospho [S20]	P47710	P47710 [22-50]	3532.55	37.51	115500	51535
[E].RLQNPSESSEPIPLESREEY.[M]	RLQNPSESSEPIPLESREEY		P47710	P47710 [26-45]	2360.14	29.72	114872	48121.6
[A].SVDSGSSEEQGGSSRALVSTLV.[P]	SVDSGSSEEQGGSSRALVSTLV		P01833	P01833 [624-645]	2152.04	37.53	114818	35251.9
[A].VVLPVPQPEIMEVPKAK.[D]	VVLPVPQPEIMEVPKAK	1xOxidation [M11]	P05814	P05814 [89-105]	1890.08	29.96	114330	45115.3
[L].NPTHQIYPVT.[Q]	NPTHQIYPVT		P05814	P05814 [205-214]	1169.59	23.72	114089	50996.7
[L].TDLENLHLPL.[P]	TDLENLHLPL		P05814	P05814 [134-143]	1164.63	48.7	113925	72761.5
[L].QPLMQQVPQPIPQTLALPPQP.[L]	QPLMQQVPQPIPQTLALPPQP	1xOxidation [M4]	P05814	P05814 [147-167]	2337.26	39.95	113045	41185.7
[P].LLQPLMQQVPQPIPQTLALPPQPLWSVPQP.[K]	LLQPLMQQVPQPIPQTLALPPQPLWSVPQP	1xOxidation [M6]	P05814	P05814 [145-174]	3370.86	43.51	112773	95177.9
[A].APDEKVLDSGFREIEN.[K]	APDEKVLDSGFREIEN		P01833	P01833 [581-596]	1818.89	25.06	112336	49537.3
[Q].LQAAHAQEQIRRMNENSHVQVPFQQ.[L]	LQAAHAQEQIRRMNENSHVQVPFQQ		P47710	P47710 [114-138]	2959.47	28.51	112198	112198
[K].SPTIPFFDPQIPKL.[T]	SPTIPFFDPQIPKL		P05814	P05814 [120-133]	1599.88	43.04	111922	38642.7
[Q].QVPQPIPQ.[T]	QVPQPIPQ		P05814	P05814 [152-159]	906.504	15.61	111896	64606.3
[P].LLQPLMQQVPQPIPQTLALPPQPLWSVPQPK.[V]	LLQPLMQQVPQPIPQTLALPPQPLWSVPQPK		P05814	P05814 [145-175]	3482.96	43.14	111891	88049.7
[R].LFAEEKAVADTR.[D]	LFAEEKAVADTR		P01833	P01833 [604-615]	1349.71	15.61	111705	79111.2
[M].EVPKAKDTVYT.[K]	EVPKAKDTVYT		P05814	P05814 [100-110]	1250.66	18.68	111207	44391.9
[Q].PEIMEVPKAKDTVYT.[K]	PEIMEVPKAKDTVYT		P05814	P05814 [96-110]	1720.88	28.4	110893	60353
[P].FPPFSDISNPTAHENYE.[K]	FPPFSDISNPTAHENYE		P47710	P47710 [161-177]	1964.87	37.13	110890	82012.4
[L].AQPAVVLPVPQPEIM.[E]	AQPAVVLPVPQPEIM	1xOxidation [M15]	P05814	P05814 [85-99]	1604.87	47.5	110763	35197.5
[M].QQVPQPIPQTLALPPQPLWSVPQP.[K]	QQVPQPIPQTLALPPQPLWSVPQP		P05814	P05814 [151-174]	2659.46	43	110077	66201.7
[Y].VPNSYPYYGTNLYQRRP.[A]	VPNSYPYYGTNLYQRRP		P07498	P07498 [51-67]	2088.03	22.13	110050	109033
[L].YQRRPAIAINNPYVPRT.[Y]	YQRRPAIAINNPYVPRT		P07498	P07498 [63-79]	2029.11	20.19	110036	109311
[Q].YPDATDEDITSH.[M]	YPDATDEDITSH		P10451	P10451 [181-192]	1363.56	22.17	109726	61087
[I].YPFVEPIPYGFLPQNILPLAQPAVVLPVPQPEIMEVPK.[A]	YPFVEPIPYGFLPQNILPLAQPAVVLPVPQPEIMEVPK		P05814	P05814 [66-103]	4240.32	44.97	109659	73144.3
[L].IYPFVEPIPYGFLPQNILP.[L]	IYPFVEPIPYGFLPQNILP		P05814	P05814 [65-83]	2217.2	44.98	109003	98975.2
[K].EIPLSPMGEDSAPRDADTLH.[S]	EIPLSPMGEDSAPRDADTLH	1xOxidation [M7]	Q13410	Q13410 [494-513]	2167	26.71	108883	31610.6
[L].WSVPQPKVLPIPQQVVPYP.[Q]	WSVPQPKVLPIPQQVVPYP		P05814	P05814 [169-187]	2172.22	41.78	108858	72559.7
[R].DVSLAKADAAPDEKVLD.[S]	DVSLAKADAAPDEKVLD		P01833	P01833 [572-588]	1756.9	27.68	108791	59229.6
[R].LQNPSESSEPIPLESREEYMNGMNRQ.[R]	LQNPSESSEPIPLESREEYMNGMNRQ	1xPhospho [S15]; 1xOxidation [M]	P47710	P47710 [27-52]	3131.34	23.23	108552	66388
[R].TYYANPAVVRPH.[A]	TYYANPAVVRPH		P07498	P07498 [79-90]	1387.71	14.68	108491	103793
[S].EPIPLESREEYMNGMN.[R]	EPIPLESREEYMNGMN	1xPhospho [S7]	P47710	P47710 [35-50]	1988.81	31.21	108357	41697
[R].DQADGSRASVDSGSSEEQGGSSRALVS.[T]	DQADGSRASVDSGSSEEQGGSSRALVS		P01833	P01833 [616-642]	2639.18	20.9	108254	32805
[P].EIMEVPKAKDTV.[Y]	EIMEVPKAKDTV	1xOxidation [M3]	P05814	P05814 [97-108]	1375.71	12.66	107827	100884
[G].DQTVSDNELQEMSNQGSK.[Y]	DQTVSDNELQEMSNQGSK		P10909	P10909 [23-40]	2009.87	17.5	107824	104079
[L].TDLENLHLPLPLLQP.[L]	TDLENLHLPLPLLQP		P05814	P05814 [134-148]	1712.96	43.52	107442	67733.1
[I].QDPRLFAEE.[K]	QDPRLFAEE		P01833	P01833 [600-608]	1104.53	18.98	107221	47876.6
[E].RLQNPSESSEPIPL.[E]	RLQNPSESSEPIPL		P47710	P47710 [26-39]	1566.81	33.03	107108	23156.8
[L].SSSEESITEYK.[Q]	SSSEESITEYK		P05814	P05814 [23-33]	1259.56	20.68	107089	31863.1
[H].QIYPVTQPLAPVHNPISV.[-]	QIYPVTQPLAPVHNPISV		P05814	P05814 [209-226]	1973.09	47.61	106958	76661.6
[K].HLKFRISHELDSASSEVN.[-]	HLKFRISHELDSASSEVN	3xPhospho [S7; S12; S14]	P10451	P10451 [297-314]	2308.94	31.92	106932	102445
[R].VMPVLKSPTIPF.[F]	VMPVLKSPTIPF	1xOxidation [M2]	P05814	P05814 [114-125]	1344.76	39.2	106300	43037.9
[P].AVVLPVPQPEIM.[E]	AVVLPVPQPEIM		P05814	P05814 [88-99]	1292.73	49.39	106112	29869.6
[A].RETIESLSSSEESITEYKQKVE.[K]	RETIESLSSSEESITEYKQKVE	3xPhospho [S8; S9; S10]	P05814	P05814 [16-37]	2812.16	26.91	105995	30800.2
[Q].DPRLFAE.[E]	DPRLFAE		P01833	P01833 [601-607]	847.431	27.16	105789	69509.3
[P].DEKVLDSGFREIEN.[K]	DEKVLDSGFREIEN		P01833	P01833 [583-596]	1650.8	31.09	105569	40008.4
[Q].NPSESSEPIPLES.[R]	NPSESSEPIPLES		P47710	P47710 [29-41]	1385.64	28.67	105105	30522.5
[A].RETIESLSSSEESITEYKQKVEKV.[K]	RETIESLSSSEESITEYKQKVEKV	1xPhospho [S/T]	P05814	P05814 [16-39]	2879.39	33.01	104950	90911.5
[H].EDQQQGEDEHQDKIYP.[S]	EDQQQGEDEHQDKIYP		P05814	P05814 [42-57]	1958.84	12.58	104932	39464.2
[K].DDPDAPLQPVTPLQL.[F]	DDPDAPLQPVTPLQL		P0C0L4	P0C0L5 [1429-1443]	1618.83	49.58	104823	35196.2
[P].AVVLPVPQPEIMEVP.[K]	AVVLPVPQPEIMEVP	1xOxidation [M12]	P05814	P05814 [88-102]	1633.89	48.74	104715	50589.1
[E].RLQNPSESSEPIPLE.[S]	RLQNPSESSEPIPLE		P47710	P47710 [26-40]	1695.85	29.85	104522	26688.8
[A].QPAVVLPVPQPE.[I]	QPAVVLPVPQPE		P05814	P05814 [86-97]	1273.72	33.94	103748	80081.5
[L].MQQVPQPIPQTLALPPQP.[L]	MQQVPQPIPQTLALPPQP	1xOxidation [M1]	P05814	P05814 [150-167]	1999.07	39.03	103195	56936.8
[T].DLENLHLPLPL.[L]	DLENLHLPLPL		P05814	P05814 [135-145]	1273.72	42.41	102857	54922.3
[M].ESSISSSSEEMSLS.[K]	ESSISSSSEEMSLS		P47710	P47710 [84-97]	1459.61	26.57	102502	60598.6
[F].VEPIPYGFLPQNI.[L]	VEPIPYGFLPQNI		P05814	P05814 [69-81]	1486.79	42.7	102331	62097.3
[F].DSDPITVTVPVEVSRKNP.[K]	DSDPITVTVPVEVSRKNP		P10909	P10909 [411-428]	1953.03	34.37	101850	50257
[S].ESSEPIPLE.[S]	ESSEPIPLE		P47710	P47710 [32-40]	1000.48	29.65	101456	47848.8
[V].VLPVPQPEIM.[E]	VLPVPQPEIM	1xOxidation [M10]	P05814	P05814 [90-99]	1138.62	36.53	101375	71344
[Y].PVTQPLAPVHNP.[I]	PVTQPLAPVHNP		P05814	P05814 [212-223]	1269.69	16.09	101347	50429.7
[F].FDPQIPKLTDLENLHL.[P]	FDPQIPKLTDLENLHL		P05814	P05814 [126-141]	1893.01	42.28	100937	93173
[A].DGSRASVDSGSSEEQGGSSRALVSTL.[V]	DGSRASVDSGSSEEQGGSSRALVSTL		P01833	P01833 [619-644]	2539.19	28.39	100770	61151.4
[S].NPTAHENYEKNNVMLQW.[-]	NPTAHENYEKNNVMLQW	1xOxidation [M14]	P47710	P47710 [169-185]	2103.96	22.55	100639	59550.4
[K].VKHEDQQQGEDEHQDK.[I]	VKHEDQQQGEDEHQDK		P05814	P05814 [39-54]	1949.86	1.39	100636	67158.4
[A].QPAVVLPVPQPEIMEVPKAKDTVYTK.[G]	QPAVVLPVPQPEIMEVPKAKDTVYTK	1xOxidation [M14]	P05814	P05814 [86-111]	2893.57	40.94	100028	90173.2
[W].SVPQPKVLPIPQQVVPYPQR.[A]	SVPQPKVLPIPQQVVPYPQR		P05814	P05814 [170-189]	2270.3	36.03	99853.6	99853.6
[S].DISNPTAHENYEKN.[N]	DISNPTAHENYEKN		P47710	P47710 [166-179]	1631.73	19.04	99558.3	41965.2
[T].HQIYPVTQPLAPVHNPIS.[V]	HQIYPVTQPLAPVHNPIS		P05814	P05814 [208-225]	2011.08	28.92	99330.1	62191.7
[P].DEKVLDSGFR.[E]	DEKVLDSGFR		P01833	P01833 [583-592]	1165.58	15.89	99284.4	95937.9
[N].ILPLAQPAVVLPVPQP.[E]	ILPLAQPAVVLPVPQP		P05814	P05814 [81-96]	1652.01	42.67	98846.3	36411
[E].SLSSSEESITEY.[K]	SLSSSEESITEY	1xPhospho [S]	P05814	P05814 [21-32]	1411.55	31.34	98805.7	43315.5
[V].LKSPTIPFFDPQIPKLTDLEN.[L]	LKSPTIPFFDPQIPKLTDLEN		P05814	P05814 [118-138]	2413.3	42.5	98660.3	73392.9
[K].TAPYVPMYYVPNSYPYYGTNL.[Y]	TAPYVPMYYVPNSYPYYGTNL		P07498	P07498 [42-62]	2473.14	42.24	98430.3	61906.2
[R].LFAEEKAVADTRDQAD.[G]	LFAEEKAVADTRDQAD		P01833	P01833 [604-619]	1778.86	24	98281.6	37486.6
[R].DGREQEAEQMPEYRG.[R]	DGREQEAEQMPEYRG		Q13410	Q13410 [79-93]	1794.77	21.88	98182.5	21374.8
[G].EDEHQDKIYPSFQPQPL.[I]	EDEHQDKIYPSFQPQPL		P05814	P05814 [48-64]	2070.98	30.86	98078.9	60485.5
[T].DEDITSHM.[E]	DEDITSHM		P10451	P10451 [186-193]	947.377	22.51	98037.8	34061.7
[K].VKHEDQQQGEDEHQDKIYPSFQPQPL.[I]	VKHEDQQQGEDEHQDKIYPSFQPQPL		P05814	P05814 [39-64]	3120.47	23.66	97981.9	62771.4
[E].SREEYMNGMN.[R]	SREEYMNGMN		P47710	P47710 [41-50]	1230.49	12.46	97774.7	58144.3
[Q].LNQLAAYPYAV.[W]	LNQLAAYPYAV		P47710	P47710 [139-149]	1222.65	34.37	97610.5	97610.5
[V].DSGSSEEQGGSSRALVSTL.[V]	DSGSSEEQGGSSRALVSTL		P01833	P01833 [626-644]	1866.87	29.79	97567.2	36302.8
[L].LLNQELLLNP.[T]	LLNQELLLNP		P05814	P05814 [197-206]	1166.68	48.21	97169.6	40867.4
[N].EYNQLQLQAAHAQEQIR.[R]	EYNQLQLQAAHAQEQIR		P47710	P47710 [108-124]	2040.03	27.44	96476.5	69218.7
[A].DGSRASVDSGSSEEQGGSSRALVSTLV.[P]	DGSRASVDSGSSEEQGGSSRALVSTLV		P01833	P01833 [619-645]	2638.26	35.18	96325	33732.3
[S].KEIPLSPMGEDSAPRDADTLH.[S]	KEIPLSPMGEDSAPRDADTLH	1xOxidation [M8]	Q13410	Q13410 [493-513]	2295.09	23.88	95887.5	35419.1
[Q].IPQRQYLPNSHPPTVVR.[R]	IPQRQYLPNSHPPTVVR		P07498	P07498 [93-109]	2002.1	15.89	95803.8	95803.8
[A].DAAPDEKVLDSGFREIENKAIQDPR.[L]	DAAPDEKVLDSGFREIENKAIQDPR		P01833	P01833 [579-603]	2813.41	36.81	95537.1	32543.6
[K].YVNKEIQNAVNGVKQIKT.[L]	YVNKEIQNAVNGVKQIKT		P10909	P10909 [41-58]	2046.13	24.75	95457.3	94435.5
[R].NILREKQTDEIKDTR.[N]	NILREKQTDEIKDTR		P47710	P47710 [54-68]	1859	19.48	94795.8	74393.2
[A].DTRDQADGSRASVDSGSSEEQGGSSRALVST.[L]	DTRDQADGSRASVDSGSSEEQGGSSRALVST		P01833	P01833 [613-643]	3112.4	21.1	94494.9	33761.8
[R].LQNPSESSEPIPLESREEY.[M]	LQNPSESSEPIPLESREEY	2xPhospho [S8; S15]	P47710	P47710 [27-45]	2363.97	30.29	94476.4	68361.5
[A].VPVQALLL.[N]	VPVQALLL		P05814	P05814 [191-198]	852.555	41.49	94357.6	51166.9
[P].AVVLPVPQPEIME.[V]	AVVLPVPQPEIME		P05814	P05814 [88-100]	1421.77	49.01	94277.3	30010.7
[P].VPQPEIMEVP.[K]	VPQPEIMEVP		P05814	P05814 [93-102]	1138.58	42.02	94141.5	55755.5
[R].LQNPSESSEPIPLESREEY.[M]	LQNPSESSEPIPLESREEY	1xPhospho [S15]	P47710	P47710 [27-45]	2284	27.6	94118.6	45792.5
[R].VPPRIDSGLYLGSGYFTAIQNLRK.[S]	VPPRIDSGLYLGSGYFTAIQNLRK		P02788	P02788 [329-352]	2665.45	48.7	94100.1	21744.2
[E].DEHQDKIYPSF.[Q]	DEHQDKIYPSF		P05814	P05814 [49-59]	1378.63	29.24	94017.3	31131.5
[M].ASVAVDPQPSVVTRVVNLPLVS.[S]	ASVAVDPQPSVVTRVVNLPLVS	1xAcetyl [N-Term]	Q99541	Q99541 [2-23]	2289.28	50.58	93467.1	44305.3
[V].VLPVPQPEIMEVP.[K]	VLPVPQPEIMEVP	1xOxidation [M10]	P05814	P05814 [90-102]	1463.78	38.38	93428.6	49085.4
[L].PVPQPEIME.[V]	PVPQPEIME	1xOxidation [M8]	P05814	P05814 [92-100]	1055.51	16.89	93228.9	33138.7
[G].EDEHQDKIYPSFQP.[Q]	EDEHQDKIYPSFQP		P05814	P05814 [48-61]	1732.78	22.21	93192.3	47440.4
[M].DPSKPSSNVAGVVIIVI.[L]	DPSKPSSNVAGVVIIVI		P22897	P22897 [1380-1396]	1694.97	50.2	93155.8	46791.8
[V].VLPVPQPEIMEVPKAKDTV.[Y]	VLPVPQPEIMEVPKAKDTV	1xOxidation [M10]	P05814	P05814 [90-108]	2106.15	36.37	93012.9	85016.8
[V].LPVPQPEIMEVPKAK.[D]	LPVPQPEIMEVPKAK		P05814	P05814 [91-105]	1675.95	29.04	93003.3	49273
[R].EIENKAIQDPRLFAEEKAVADTRDQADGS.[R]	EIENKAIQDPRLFAEEKAVADTRDQADGS		P01833	P01833 [593-621]	3216.58	24.06	92314.4	39341.4
[R].THYYAVAVVK.[K]	THYYAVAVVK		P02788	P02788 [109-118]	1150.63	23.28	92109.3	23485.6
[S].ESSEPIPLESREEYMNGMN.[R]	ESSEPIPLESREEYMNGMN	1xPhospho [S10]; 1xOxidation [M]	P47710	P47710 [32-50]	2307.91	32.37	91810.8	26124.3
[P].QRAVPVQALL.[L]	QRAVPVQALL		P05814	P05814 [188-197]	1094.67	29.58	91717.4	85961.1
[R].RPDIQYPDAT.[D]	RPDIQYPDAT		P10451	P10451 [176-185]	1175.57	22.83	91573.9	31496.5
[P].IPYGFLP.[Q]	IPYGFLP		P05814	P05814 [72-78]	806.445	49.1	91501.7	79043.2
[L].PVPQPEIMEVPKAKDT.[V]	PVPQPEIMEVPKAKDT		P05814	P05814 [92-107]	1778.94	29.04	91390.7	68041.4
[R].ETIESLSSSEESITEYKQKVEKV.[K]	ETIESLSSSEESITEYKQKVEKV		P05814	P05814 [17-39]	2643.32	38.87	91323.9	66802.7
[E].DEHQDKIYPSFQPQ.[P]	DEHQDKIYPSFQPQ		P05814	P05814 [49-62]	1731.8	27.19	90906.5	67493.9
[V].AQDLNAPSDWDSRGKDSYETSQLDDQSAETHSH.[K]	AQDLNAPSDWDSRGKDSYETSQLDDQSAETHSH		P10451	P10451 [208-240]	3690.58	26.44	90894.8	68032.1
[P].VKQADSGSSEEKQLYNKYPDAVAT.[W]	VKQADSGSSEEKQLYNKYPDAVAT		P10451	P10451 [19-42]	2628.28	16.13	90707.6	90707.6
[D].EKVLDSGFREIEN.[K]	EKVLDSGFREIEN		P01833	P01833 [584-596]	1535.77	26.84	90379.4	23212.8
[R].LQNPSESSEPIPLESREEY.[M]	LQNPSESSEPIPLESREEY		P47710	P47710 [27-45]	2204.04	25.22	90354.4	44437.8
[A].SVDSGSSEEQGGSSRALVST.[L]	SVDSGSSEEQGGSSRALVST		P01833	P01833 [624-643]	1939.88	21.34	89645.8	19618.8
[L].PVPQPEIMEVPKAKDTVYTKG.[R]	PVPQPEIMEVPKAKDTVYTKG	1xOxidation [M8]	P05814	P05814 [92-112]	2343.23	17.27	89631.3	40846.9
[K].VKHEDQQQGEDEHQDKIYPS.[F]	VKHEDQQQGEDEHQDKIYPS		P05814	P05814 [39-58]	2410.09	12.88	89323.2	25673.3
[A].DAAPDEKVLDSGFRE.[I]	DAAPDEKVLDSGFRE		P01833	P01833 [579-593]	1648.78	28.42	88992.5	60136
[R].RPDIQYPDATDEDITSHMESEELNGA.[Y]	RPDIQYPDATDEDITSHMESEELNGA	1xPhospho [S20]	P10451	P10451 [176-201]	3013.24	41.54	88953.7	26484.9
[V].VLPVPQPEIMEVPKAKDTVYTK.[G]	VLPVPQPEIMEVPKAKDTVYTK		P05814	P05814 [90-111]	2482.36	41.01	88877.1	50135.4
[P].LIYPFVEPIPYG.[F]	LIYPFVEPIPYG		P05814	P05814 [64-75]	1407.76	43.8	88818.2	72758.7
[D].EKVLDSGF.[R]	EKVLDSGF		P01833	P01833 [584-591]	894.457	25.94	88372.5	77149
[M].NENSHVQVPFQQL.[N]	NENSHVQVPFQQL		P47710	P47710 [127-139]	1539.76	29.9	88109.3	38960.5
[Q].ELLLNPTHQIYPVT.[Q]	ELLLNPTHQIYPVT		P05814	P05814 [201-214]	1637.89	46.42	87941	29170.9
[E].SLSSSEESITEYKQKVE.[K]	SLSSSEESITEYKQKVE	2xPhospho [S/T]	P05814	P05814 [21-37]	2103.88	19.93	87868.4	16551.7
[Q].NPSESSEPIPLESREEYMNGMN.[R]	NPSESSEPIPLESREEYMNGMN	1xPhospho [S13]; 1xOxidation [M21]	P47710	P47710 [29-50]	2606.04	33.89	87759.9	25234.9
[D].AAPDEKVLDSGF.[R]	AAPDEKVLDSGF		P01833	P01833 [580-591]	1248.61	23.61	87739.7	59237
[P].LLQPLMQQVPQPIPQ.[T]	LLQPLMQQVPQPIPQ	1xOxidation [M6]	P05814	P05814 [145-159]	1745.96	34.99	87700.5	56904.9
[E].DQQQGEDEHQDKIYPSFQP.[Q]	DQQQGEDEHQDKIYPSFQP		P05814	P05814 [43-61]	2289.01	29.89	87649.5	59509.5
[S].SSEESITEYK.[Q]	SSEESITEYK		P05814	P05814 [24-33]	1172.53	20.51	87610.9	25906.4
[Y].YVPNSYPYYGTNLYQRRPAIA.[I]	YVPNSYPYYGTNLYQRRPAIA		P07498	P07498 [50-70]	2506.25	30.11	87182.7	66201.1
[P].YGFLPQNILP.[L]	YGFLPQNILP		P05814	P05814 [74-83]	1161.63	51.63	87118	78527.5
[V].LPIPQQVVPYPQRAVPVQALL.[L]	LPIPQQVVPYPQRAVPVQALL		P05814	P05814 [177-197]	2326.36	42.05	86837	70222.7
[L].LLNQEL.[L]	LLNQEL		P05814	P05814 [197-202]	729.414	28.79	86756.1	32162.5
[R].DVSLAKADAAPD.[E]	DVSLAKADAAPD		P01833	P01833 [572-583]	1172.58	22.49	86661	48112.6
[L].SSSEESITEYKQKVE.[K]	SSSEESITEYKQKVE	1xPhospho [S]	P05814	P05814 [23-37]	1823.79	23.55	86641.6	39646.3
[R].RPDIQYPDATDEDITSH.[M]	RPDIQYPDATDEDITSH	1xPhospho [T10]	P10451	P10451 [176-192]	2052.85	27.09	86221.4	27099
[V].DSGSSEEQGGSSRALVSTLVPL.[G]	DSGSSEEQGGSSRALVSTLVPL		P01833	P01833 [626-647]	2176.07	40.61	86218.4	32990.7
[L].FAEEKAVADTRDQADGSRASV.[D]	FAEEKAVADTRDQADGSRASV		P01833	P01833 [605-625]	2223.06	22.07	85520.5	38830.6
[A].IQDPRLFAEEKAVADTRDQA.[D]	IQDPRLFAEEKAVADTRDQA		P01833	P01833 [599-618]	2273.15	22.37	85091.8	35562
[L].WSVPQPKVLPIPQQ.[V]	WSVPQPKVLPIPQQ		P05814	P05814 [169-182]	1616.92	46.88	85081.4	70273.2
[L].PVPQPEIMEVPKAKDTVY.[T]	PVPQPEIMEVPKAKDTVY	1xOxidation [M8]	P05814	P05814 [92-109]	2057.06	28.51	85052.4	54027.4
[R].TPVLSAEASTAKEPEIGN.[L]	TPVLSAEASTAKEPEIGN		P24821	P24821 [1426-1443]	1813.92	19.31	84598.6	79756
[A].LPPQPLWSVPQPK.[V]	LPPQPLWSVPQPK		P05814	P05814 [163-175]	1486.84	34.63	84500.3	64640.7
[G].DQTVSDNELQEMSNQGS.[K]	DQTVSDNELQEMSNQGS		P10909	P10909 [23-39]	1881.78	28.15	83826	56787.9
[I].YPFVEPIPYGFLPQNIL.[P]	YPFVEPIPYGFLPQNIL		P05814	P05814 [66-82]	2007.06	44.97	83206.7	48000.4
[R].MNENSHVQVPFQQLNQ.[L]	MNENSHVQVPFQQLNQ	1xOxidation [M1]	P47710	P47710 [126-141]	1928.89	24.08	82956.2	54791
[K].DVFLGMFLYEYAR.[R]	DVFLGMFLYEYAR		P02768	P02768 [348-360]	1623.79	52.06	82897.8	9108.93
[H].EDQQQGEDEHQDKIYPSFQPQPLIYP.[F]	EDQQQGEDEHQDKIYPSFQPQPLIYP		P05814	P05814 [42-67]	3129.44	47.47	82860.4	47308.4
[P].VPQPEIMEVPKAKDTV.[Y]	VPQPEIMEVPKAKDTV		P05814	P05814 [93-108]	1780.95	31	82750.5	82750.5
[Q].LYNKYPDAVAT.[W]	LYNKYPDAVAT		P10451	P10451 [32-42]	1254.64	23.82	82689.8	26015
[P].VPQPEIMEVPKAKDTVYTKG.[R]	VPQPEIMEVPKAKDTVYTKG	1xOxidation [M7]	P05814	P05814 [93-112]	2246.17	24.05	82507.2	76448.4
[F].FDPQIPKLTDLENLH.[L]	FDPQIPKLTDLENLH		P05814	P05814 [126-140]	1779.93	40.16	82500.3	80506.4
[R].RPNLHPSF.[I]	RPNLHPSF		P07498	P07498 [110-117]	967.511	23.06	81635.1	76686.2
[L].RYPERLQNPSESSEPIPLESREEYMNGMN.[R]	RYPERLQNPSESSEPIPLESREEYMNGMN	2xPhospho [S]	P47710	P47710 [22-50]	3612.52	39.53	81631.8	62806.3
[Q].DPRLFAEEKAVADTRDQADGS.[R]	DPRLFAEEKAVADTRDQADGS		P01833	P01833 [601-621]	2291.09	19.17	81626	33824.9
[Q].YVPFPPFSDISNPTAHENYEKNNVM.[L]	YVPFPPFSDISNPTAHENYEKNNVM		P47710	P47710 [158-182]	2910.34	40.71	81450.4	78971.6
[A].RETIESLSSSEESITEYKQ.[K]	RETIESLSSSEESITEYKQ		P05814	P05814 [16-34]	2216.06	30.54	81376.4	37669.9
[L].FAEEKAVADTRDQADGSRASVDSGSSEEQGGSSRALVSTL.[V]	FAEEKAVADTRDQADGSRASVDSGSSEEQGGSSRALVSTL		P01833	P01833 [605-644]	4070.91	28.99	81329.3	35560.1
[A].RETIESLSSSEESITEY.[K]	RETIESLSSSEESITEY	2xPhospho [S9; S10]	P05814	P05814 [16-32]	2119.84	43.76	81289.9	72593.5
[D].IQYPDATDEDITSHMESEELNGA.[Y]	IQYPDATDEDITSHMESEELNGA		P10451	P10451 [179-201]	2565.09	32.9	81199.9	31514.2
[V].LPVPQPEIMEVPKAKDTVYTKG.[R]	LPVPQPEIMEVPKAKDTVYTKG	1xOxidation [M9]	P05814	P05814 [91-112]	2456.31	30.24	81019.9	62533.8
[G].DQTVSDNELQEMSNQGSKYVNK.[E]	DQTVSDNELQEMSNQGSKYVNK		P10909	P10909 [23-44]	2514.14	31.57	80427	70812.3
[D].LNAPSDWDSRGKDSYETSQLDDQSAETHSH.[K]	LNAPSDWDSRGKDSYETSQLDDQSAETHSH	1xPhospho [S9]	P10451	P10451 [211-240]	3456.42	17.82	80280.9	46684
[L].NEYNQLQLQAAHAQEQIRR.[M]	NEYNQLQLQAAHAQEQIRR		P47710	P47710 [107-125]	2310.17	21.89	80216.3	57450
[R].ASVDSGSSEEQGGSSRALVSTL.[V]	ASVDSGSSEEQGGSSRALVSTL		P01833	P01833 [623-644]	2124.01	22.21	80087.2	40585.7
[R].RMNENSHVQVPFQ.[Q]	RMNENSHVQVPFQ		P47710	P47710 [125-137]	1585.75	17.61	80010.8	78975.1
[L].MQQVPQPIPQTLALPPQPLWSVPQP.[K]	MQQVPQPIPQTLALPPQPLWSVPQP		P05814	P05814 [150-174]	2790.5	42.99	79781.1	63059.8
[K].ADAAPDEKVLDSGFREIENKAIQDP.[R]	ADAAPDEKVLDSGFREIENKAIQDP		P01833	P01833 [578-602]	2728.34	38.77	79769.2	33938.8
[D].PQIPKLTDLENL.[H]	PQIPKLTDLENL		P05814	P05814 [128-139]	1380.77	40.5	79682	31453.1
[K].EIPLSPMGEDSAPRDADTLH.[S]	EIPLSPMGEDSAPRDADTLH		Q13410	Q13410 [494-513]	2151	24.72	79626.8	21277.5
[P].VKQADSGSSEEKQLYNKYPDAVAT.[W]	VKQADSGSSEEKQLYNKYPDAVAT	1xPhospho [S]	P10451	P10451 [19-42]	2708.25	17.77	78709.5	50768.3
[P].KVLPIPQQVVPYPQ.[R]	KVLPIPQQVVPYPQ		P05814	P05814 [175-188]	1605.94	35.1	78653.4	78653.4
[T].IESLSSSEESITEYKQKVEK.[V]	IESLSSSEESITEYKQKVEK	1xPhospho [S/T]	P05814	P05814 [19-38]	2394.13	25.82	78608.2	27664.3
[R].ETIESLSSSEESITEYKQ.[K]	ETIESLSSSEESITEYKQ	1xPhospho [S]	P05814	P05814 [17-34]	2139.92	37.53	78599.2	25568.2
[P].KLPLRYPERLQNPSESSEPIPLESREEYMNGMN.[R]	KLPLRYPERLQNPSESSEPIPLESREEYMNGMN	1xPhospho [S24]	P47710	P47710 [18-50]	3983.87	34.44	78120.4	69128
[K].EIPLSPMGEDSAPRDADTLHSKLIPTQPSQGAP.[-]	EIPLSPMGEDSAPRDADTLHSKLIPTQPSQGAP		Q13410	Q13410 [494-526]	3455.71	42.21	78096	53372
[M].SNQGSKYVNKEIQNAVNGVK.[Q]	SNQGSKYVNKEIQNAVNGVK		P10909	P10909 [35-54]	2177.13	19.27	77946.6	77946.6
[A].SVDSGSSEEQGGSSRALVSTL.[V]	SVDSGSSEEQGGSSRALVSTL		P01833	P01833 [624-644]	2052.97	29.9	77902	58554.9
[T].WLNPDPSQKQNL.[L]	WLNPDPSQKQNL		P10451	P10451 [43-54]	1439.73	29.38	77884.9	33167.4
[P].QTLALPPQPLWSVPQP.[K]	QTLALPPQPLWSVPQP		P05814	P05814 [159-174]	1771.97	41.97	77863.6	70661.6
[P].AVVLPVPQPEIMEVPKAK.[D]	AVVLPVPQPEIMEVPKAK		P05814	P05814 [88-105]	1945.12	39.08	77669.4	64782.7
[P].LIYPFVEPIPYGFLPQNILPLAQPAVVLPVPQPEIMEVPK.[A]	LIYPFVEPIPYGFLPQNILPLAQPAVVLPVPQPEIMEVPK		P05814	P05814 [64-103]	4466.49	45.2	77475.8	56568.4
[Q].YLPNSHPPTVVR.[R]	YLPNSHPPTVVR		P07498	P07498 [98-109]	1379.74	22.99	77321.8	75353.5
[E].PIPYGFLPQNILP.[L]	PIPYGFLPQNILP		P05814	P05814 [71-83]	1468.82	43.96	77252.8	61823.2
[A].INNPYVPRTYY.[A]	INNPYVPRTYY		P07498	P07498 [71-81]	1399.7	24.93	76984.2	75120
[Q].NPSESSEPIPLESREEYMNGMN.[R]	NPSESSEPIPLESREEYMNGMN	1xOxidation [M18]	P47710	P47710 [29-50]	2526.08	30.09	76780.9	26600.1
[D].IQYPDATDEDITSHMESEELNGAY.[K]	IQYPDATDEDITSHMESEELNGAY	1xPhospho [S/T]; 1xOxidation [M15]	P10451	P10451 [179-202]	2824.12	38.1	76768	36698.3
[S].LSSSEESITEYKQKVEK.[V]	LSSSEESITEYKQKVEK	2xPhospho [S3; S4]	P05814	P05814 [22-38]	2144.94	24.52	76568.6	23816.6
[D].LNAPSDWDSRGKDSYETSQLDDQSAETHSH.[K]	LNAPSDWDSRGKDSYETSQLDDQSAETHSH		P10451	P10451 [211-240]	3376.46	25.09	76306.3	76306.3
[Y].GFLPQNILPLAQPA.[V]	GFLPQNILPLAQPA		P05814	P05814 [75-88]	1478.84	51.29	76249.2	27133
[L].NPTHQIYPVTQ.[P]	NPTHQIYPVTQ		P05814	P05814 [205-215]	1297.65	14.66	76241.2	37977.6
[L].YQRRPAIAINNPYVPR.[T]	YQRRPAIAINNPYVPR		P07498	P07498 [63-78]	1928.06	19.51	76222.7	75183.6
[R].ISHELDSASSEVN.[-]	ISHELDSASSEVN		P10451	P10451 [302-314]	1387.63	20.52	76181.5	23457.5
[P].LAQPAVVLPVPQPEIMEVPKAKDTV.[Y]	LAQPAVVLPVPQPEIMEVPKAKDTV		P05814	P05814 [84-108]	2669.49	40.47	76062.6	39144.1
[D].PQIPKLTDLENLHLP.[L]	PQIPKLTDLENLHLP		P05814	P05814 [128-142]	1727.97	40.98	75615.9	35994.5
[Q].LQLQAAHAQEQIR.[R]	LQLQAAHAQEQIR		P47710	P47710 [112-124]	1505.82	14.74	75555	72656.7
[L].PVPQPEIMEVPKA.[K]	PVPQPEIMEVPKA		P05814	P05814 [92-104]	1434.77	28.06	75291.8	24426.8
[L].SSSEESITEYKQKVEK.[V]	SSSEESITEYKQKVEK	2xPhospho [S/T]	P05814	P05814 [23-38]	2031.86	23.1	75282.4	29867.8
[P].DIQYPDATDEDITSHMESEELNGA.[Y]	DIQYPDATDEDITSHMESEELNGA		P10451	P10451 [178-201]	2680.12	43.31	75170.1	24837.7
[Q].IPQRQYLPNSHPPTV.[V]	IPQRQYLPNSHPPTV		P07498	P07498 [93-107]	1746.93	17.53	75073.5	56144.3
[R].PAIAINNPYVPRT.[Y]	PAIAINNPYVPRT		P07498	P07498 [67-79]	1425.78	35.12	74933.8	74933.8
[Y].VPNSYPYYGTNLYQ.[R]	VPNSYPYYGTNLYQ		P07498	P07498 [51-64]	1678.77	29.79	74462.4	68270.6
[L].SSSEESITEYKQKVEK.[V]	SSSEESITEYKQKVEK		P05814	P05814 [23-38]	1871.92	21.21	74461.8	28911.5
[G].DQTVSDNELQEMSNQGSKYVNKEIQNAVNGVK.[Q]	DQTVSDNELQEMSNQGSKYVNKEIQNAVNGVK		P10909	P10909 [23-54]	3566.7	48.09	74382	74382
[R].RPDIQYPDATDEDITSHMESEELNGAYK.[A]	RPDIQYPDATDEDITSHMESEELNGAYK		P10451	P10451 [176-203]	3224.43	30.63	73944	24790.9
[F].FDPQIPKLTDLENLHLPL.[P]	FDPQIPKLTDLENLHLPL		P05814	P05814 [126-143]	2103.15	43.29	73738.6	68629.6
[L].QPLMQQVPQPIPQTL.[A]	QPLMQQVPQPIPQTL		P05814	P05814 [147-161]	1717.93	39.7	73465	31251.8
[Q].NPSESSEPIPLESREEYMNGMN.[R]	NPSESSEPIPLESREEYMNGMN	2xOxidation [M18; M21]	P47710	P47710 [29-50]	2542.07	26.78	73275.5	26936.8
[N].PTHQIYPVTQPLAPVHNP.[I]	PTHQIYPVTQPLAPVHNP		P05814	P05814 [206-223]	2009.06	22.91	73260.6	66268.6
[S].SEPIPLESREEYMNGMN.[R]	SEPIPLESREEYMNGMN	1xPhospho [S8]	P47710	P47710 [34-50]	2075.84	31.75	73199.7	29462.8
[F].SDISNPTAHENYEK.[N]	SDISNPTAHENYEK		P47710	P47710 [165-178]	1604.72	10.85	72694	71168.6
[R].EIENKAIQDPRLFAEE.[K]	EIENKAIQDPRLFAEE		P01833	P01833 [593-608]	1901.96	25.6	72283.1	29841.9
[K].LTDLENLHLPLPLLQ.[P]	LTDLENLHLPLPLLQ		P05814	P05814 [133-147]	1728.99	43.49	72260.4	38146.2
[N].EYNQLQLQAAHAQEQI.[R]	EYNQLQLQAAHAQEQI		P47710	P47710 [108-123]	1883.92	26.77	71872	38513.2
[Q].IPKLTDLENLHLPL.[P]	IPKLTDLENLHLPL		P05814	P05814 [130-143]	1615.94	42.39	71558	68616.7
[L].AKADAAPDEKVLDSGFREIENK.[A]	AKADAAPDEKVLDSGFREIENK		P01833	P01833 [576-597]	2403.22	32.21	71486.8	43904.8
[L].PVPQPEIMEVPKAKDT.[V]	PVPQPEIMEVPKAKDT	1xOxidation [M8]	P05814	P05814 [92-107]	1794.93	16.04	71466.6	40132.9
[M].NENSHVQVPFQQLN.[Q]	NENSHVQVPFQQLN		P47710	P47710 [127-140]	1653.8	32.26	71464.1	51148.9
[S].SRALVSTLV.[P]	SRALVSTLV		P01833	P01833 [637-645]	945.573	32.77	71273.1	55289.4
[L].NPTHQIYP.[V]	NPTHQIYP		P05814	P05814 [205-212]	969.479	21.89	71173.6	31770.1
[A].DGSRASVDSGSSEEQGGSSRAL.[V]	DGSRASVDSGSSEEQGGSSRAL		P01833	P01833 [619-640]	2138.95	18.81	71162.9	34525.6
[K].DTVYTKGRVMP.[V]	DTVYTKGRVMP		P05814	P05814 [106-116]	1266.65	22.59	71010	31909.3
[G].EDSAPRDADTLHSKLIPTQPSQGAP.[-]	EDSAPRDADTLHSKLIPTQPSQGAP		Q13410	Q13410 [502-526]	2631.3	27.32	70984.5	21179.6
[S].EEQGGSSRALVSTL.[V]	EEQGGSSRALVSTL		P01833	P01833 [631-644]	1433.72	28.24	70866.1	32925.1
[K].SPTIPFFDPQIPKLTDLENL.[H]	SPTIPFFDPQIPKLTDLENL		P05814	P05814 [120-139]	2285.21	43.99	70544.5	38662.4
[S].KEIPLSPMGEDSAPRDADTLHSKL.[I]	KEIPLSPMGEDSAPRDADTLHSKL	1xOxidation [M8]	Q13410	Q13410 [493-516]	2623.3	26.34	70480.4	29272.8
[R].DVQNVAAAPELAMGA.[L]	DVQNVAAAPELAMGA		O00391	O00391 [554-568]	1456.71	40.75	70435.2	67384.2
[Q].EQIRRMNENSHVQVPFQQ.[L]	EQIRRMNENSHVQVPFQQ		P47710	P47710 [121-138]	2240.1	17.2	69860.7	63276.7
[K].AIQDPRLFAEEKA.[V]	AIQDPRLFAEEKA		P01833	P01833 [598-610]	1487.79	28.72	69607	21585.7
[P].KVLPIPQQVVPYPQRAVPVQA.[L]	KVLPIPQQVVPYPQRAVPVQA		P05814	P05814 [175-195]	2327.36	43.71	69413.9	69413.9
[N].DRQQTHMLDVMQDHFS.[R]	DRQQTHMLDVMQDHFS		P10909	P10909 [166-181]	1987.87	27.58	69402.2	66434.5
[V].LPVPQPEIMEV.[P]	LPVPQPEIMEV	1xOxidation [M9]	P05814	P05814 [91-101]	1267.66	33.06	69358.3	24732.4
[K].LTDLENLHLPL.[P]	LTDLENLHLPL		P05814	P05814 [133-143]	1277.71	41.59	69357.7	33063.6
[P].IPLESREEYMNGMN.[R]	IPLESREEYMNGMN	1xPhospho [S5]	P47710	P47710 [37-50]	1762.72	26.41	69319.7	23748.4
[Q].YVPFPPFSDISNPT.[A]	YVPFPPFSDISNPT		P47710	P47710 [158-171]	1580.76	42.47	69109.8	66452.4
[L].LNQELLLNP.[T]	LNQELLLNP		P05814	P05814 [198-206]	1053.59	41.79	68941.3	24248.8
[P].AVVLPVPQPEIMEVPKA.[K]	AVVLPVPQPEIMEVPKA	1xOxidation [M12]	P05814	P05814 [88-104]	1833.02	38.51	68853.8	27679.6
[Y].VPFPPFSDI.[S]	VPFPPFSDI		P47710	P47710 [159-167]	1018.52	42.96	68703.9	55269.7
[R].RPDIQYPDATDEDITSHMESEELNGAYKAIP.[V]	RPDIQYPDATDEDITSHMESEELNGAYKAIP		P10451	P10451 [176-206]	3505.61	46.93	68673.5	51591.7
[E].DEHQDKIYPSFQPQPLIYP.[F]	DEHQDKIYPSFQPQPLIYP		P05814	P05814 [49-67]	2315.13	47.94	68598.2	26705.2
[K].AIPVAQDLNAPSDWDSRGKD.[S]	AIPVAQDLNAPSDWDSRGKD		P10451	P10451 [204-223]	2155.04	35.31	68479.7	15371.6
[V].LPVPQPEIMEVPKAKD.[T]	LPVPQPEIMEVPKAKD		P05814	P05814 [91-106]	1790.97	37.16	67943.6	60827.6
[T].DEDITSHMESEELNGAY.[K]	DEDITSHMESEELNGAY	1xPhospho [T/S]	P10451	P10451 [186-202]	2019.75	39.58	67887.6	23280.3
[R].LFAEEKAVA.[D]	LFAEEKAVA		P01833	P01833 [604-612]	977.53	24.29	67762	40667.3
[R].ETIESLSSSEESITEYKQK.[V]	ETIESLSSSEESITEYKQK		P05814	P05814 [17-35]	2188.05	30.69	67713.9	21276.9
[A].LLLNQELLLNPTHQIYPVTQPL.[A]	LLLNQELLLNPTHQIYPVTQPL		P05814	P05814 [196-217]	2557.44	42.71	67642.5	36584.3
[L].DIKGIDY.[W]	DIKGIDY		P00709	P00709 [116-122]	823.42	25.34	67524.2	44240.6
[Q].LNEQFNWVS.[R]	LNEQFNWVS		P10909	P10909 [362-370]	1136.54	34.34	67342.6	67342.6
[K].DDPDAPLQPVTPL.[Q]	DDPDAPLQPVTPL		P0C0L4	P0C0L5 [1429-1441]	1377.69	43.14	67253.9	65291.6
[K].ADAAPDEKVLDSGFRE.[I]	ADAAPDEKVLDSGFRE		P01833	P01833 [578-593]	1719.82	20.09	67208.5	46329.4
[E].DQQQGEDEHQDKIYPSFQPQ.[P]	DQQQGEDEHQDKIYPSFQPQ		P05814	P05814 [43-62]	2417.06	19.01	67000.5	47162.8
[K].AIPVAQDLNAPS.[D]	AIPVAQDLNAPS		P10451	P10451 [204-215]	1195.63	30.77	66932.4	17049.8
[S].LSSSEESITEYKQKVE.[K]	LSSSEESITEYKQKVE	1xPhospho [S4]	P05814	P05814 [22-37]	1936.88	25.13	66922.8	49965
[P].QPEIMEVPKAKDTV.[Y]	QPEIMEVPKAKDTV		P05814	P05814 [95-108]	1584.83	19.13	66764.3	65393.7
[S].NPTAHENYEKNNVMLQ.[W]	NPTAHENYEKNNVMLQ		P47710	P47710 [169-184]	1901.88	22.5	66574.6	55588.2
[K].DLAPPSEPSES.[F]	DLAPPSEPSES		P24821	P24821 [76-86]	1128.51	14.86	66486.7	66006.3
[L].DSGFREIENKAIQDPR.[L]	DSGFREIENKAIQDPR		P01833	P01833 [588-603]	1874.94	18.76	66379.4	56702.7
[A].IPVAQDLNAPS.[D]	IPVAQDLNAPS		P10451	P10451 [205-215]	1124.59	27.58	66351.8	27188.8
[P].AVVLPVPQPEIMEVPK.[A]	AVVLPVPQPEIMEVPK	1xOxidation [M12]	P05814	P05814 [88-103]	1761.98	37.12	66155.2	59512.4
[S].SEESITEYKQKVE.[K]	SEESITEYKQKVE		P05814	P05814 [25-37]	1569.76	21.76	66059.7	49850.6
[T].IESLSSSEESITEYK.[Q]	IESLSSSEESITEYK		P05814	P05814 [19-33]	1701.81	30.14	65950	23239.5
[P].AVVLPVPQPEIMEVPKAKDT.[V]	AVVLPVPQPEIMEVPKAKDT		P05814	P05814 [88-107]	2161.19	39.11	65943.7	33906.5
[T].APYVPMYYVPNSYPYYGTN.[L]	APYVPMYYVPNSYPYYGTN	1xOxidation [M6]	P07498	P07498 [43-61]	2275.01	39.28	65722.8	65722.8
[M].QQVPQPIPQTLALPPQPLWSVPQPK.[V]	QQVPQPIPQTLALPPQPLWSVPQPK		P05814	P05814 [151-175]	2787.56	41.75	65642.3	46187.6
[R].GDSVVYGLRS.[K]	GDSVVYGLRS		P10451	P10451 [160-169]	1052.54	24.25	65431.7	42146.9
[N].ILPLAQPAVVLPVPQPE.[I]	ILPLAQPAVVLPVPQPE		P05814	P05814 [81-97]	1781.06	50.56	65341.1	65341.1
[P].KVLPIPQQVVPYPQR.[A]	KVLPIPQQVVPYPQR		P05814	P05814 [175-189]	1762.04	28.82	65089	65089
[I].NNPYVPRTYYANPAVVRPHAQIPQ.[R]	NNPYVPRTYYANPAVVRPHAQIPQ		P07498	P07498 [72-95]	2765.43	24.26	65012.3	65012.3
[I].MEVPKAKDTVY.[T]	MEVPKAKDTVY		P05814	P05814 [99-109]	1280.66	23.24	65006.1	47721.8
[I].YPFVEPIPYGFLPQ.[N]	YPFVEPIPYGFLPQ		P05814	P05814 [66-79]	1666.85	43.86	64961.5	43665.6
[D].LSDQVPDTESET.[R]	LSDQVPDTESET		P01024	P01024 [967-978]	1320.58	13.84	64816.2	64209.3
[Q].YVPFPPFSDISNP.[T]	YVPFPPFSDISNP		P47710	P47710 [158-170]	1479.72	50.66	64599.3	43351.5
[V].VPYPQRAVPVQALL.[L]	VPYPQRAVPVQALL		P05814	P05814 [184-197]	1550.91	39.14	64103.3	53226
[E].RLQNPSESSEPIPLESREEY.[M]	RLQNPSESSEPIPLESREEY	1xPhospho [S16]	P47710	P47710 [26-45]	2440.1	31.87	64025	21091.8
[R].ELDESLQVAE.[R]	ELDESLQVAE		P10909	P10909 [326-335]	1132.54	29.15	64009.3	53419.6
[P].VPQPEIMEVP.[K]	VPQPEIMEVP	1xOxidation [M7]	P05814	P05814 [93-102]	1154.58	30.43	63995.8	42274.6
[T].IESLSSSEESITEYK.[Q]	IESLSSSEESITEYK	1xPhospho [S/T]	P05814	P05814 [19-33]	1781.77	35.38	63681.2	27742.1
[D].IQYPDATDEDITSHMESEELNGA.[Y]	IQYPDATDEDITSHMESEELNGA	1xOxidation [M15]	P10451	P10451 [179-201]	2581.09	31.33	63525.9	27869.5
[P].LLQPLMQ.[Q]	LLQPLMQ		P05814	P05814 [145-151]	842.48	28.48	63411.5	32557.6
[P].QQVVPYPQRAVPVQA.[L]	QQVVPYPQRAVPVQA		P05814	P05814 [181-195]	1679.92	22.17	63320.1	42938.7
[H].EDQQQGEDEHQDKIYPS.[F]	EDQQQGEDEHQDKIYPS		P05814	P05814 [42-58]	2045.87	11.08	63266.1	28695.3
[R].TSKGEKFPSTSESRNPDEEGLFTVAAS.[V]	TSKGEKFPSTSESRNPDEEGLFTVAAS		Q13410	Q13410 [179-205]	2871.36	24.49	63005.8	54006.1
[R].RPAIAINNPYVPRTY.[Y]	RPAIAINNPYVPRTY		P07498	P07498 [66-80]	1744.95	26.75	62914.9	62005.5
[Q].DLNAPSDWDSRGKDSYETSQL.[D]	DLNAPSDWDSRGKDSYETSQL		P10451	P10451 [210-230]	2384.06	32.76	62891.1	32828.5
[P].QIPKLTDLEN.[L]	QIPKLTDLEN		P05814	P05814 [129-138]	1170.64	24.29	62877.1	29960
[E].TIESLSSSEESITEY.[K]	TIESLSSSEESITEY	1xPhospho [T/S]	P05814	P05814 [18-32]	1754.73	35.48	62779.1	27090.7
[S].VDSGSSEEQGGSSRALVSTLVP.[L]	VDSGSSEEQGGSSRALVSTLVP		P01833	P01833 [625-646]	2162.06	41.91	62676.6	21921.4
[L].AKADAAPDEKVLDSGF.[R]	AKADAAPDEKVLDSGF		P01833	P01833 [576-591]	1633.81	29.38	62621.3	32683.9
[S].SSEESITEYKQKVE.[K]	SSEESITEYKQKVE		P05814	P05814 [24-37]	1656.8	14.13	62260.4	50419.8
[T].IESLSSSEESITEYKQKVEKV.[K]	IESLSSSEESITEYKQKVEKV		P05814	P05814 [19-39]	2413.23	35.15	62229.4	57111.5
[M].QYVPFPPFSDISNPTAHENYEKNNV.[M]	QYVPFPPFSDISNPTAHENYEKNNV		P47710	P47710 [157-181]	2907.36	40.16	62224	54606.5
[P].AVVLPVPQPEIMEVPKAKDTVY.[T]	AVVLPVPQPEIMEVPKAKDTVY	1xOxidation [M12]	P05814	P05814 [88-109]	2439.32	38.02	62124.2	40327
[V].KHEDQQQGEDEHQDKIYPSFQPQPL.[I]	KHEDQQQGEDEHQDKIYPSFQPQPL		P05814	P05814 [40-64]	3021.4	24.6	61323.9	28680.1
[L].FAEEKAVADTRDQADGSRA.[S]	FAEEKAVADTRDQADGSRA		P01833	P01833 [605-623]	2036.96	20.15	61230.6	14755.9
[D].ATDEDITSHMESEELNGAYK.[A]	ATDEDITSHMESEELNGAYK	1xPhospho [S12]; 1xOxidation [M10]	P10451	P10451 [184-203]	2335.93	24.42	61219.6	28920.9
[N].QELLLNPTHQIYPVTQPLAPVHNPISV.[-]	QELLLNPTHQIYPVTQPLAPVHNPISV		P05814	P05814 [200-226]	3018.64	40.8	61142.6	53901.9
[A].DSGSSEEKQLYNKYPDAVAT.[W]	DSGSSEEKQLYNKYPDAVAT	1xPhospho [S5]	P10451	P10451 [23-42]	2281.99	28.47	61024.5	39051.1
[E].PIPLESREEYMNGMN.[R]	PIPLESREEYMNGMN	1xPhospho [S6]	P47710	P47710 [36-50]	1859.77	29.57	60738	31618.5
[L].LQPLMQQVPQPIPQTLALPPQPLWSVPQP.[K]	LQPLMQQVPQPIPQTLALPPQPLWSVPQP		P05814	P05814 [146-174]	3241.78	43.66	60612.1	50808.9
[L].NPTHQIYPVTQPLA.[P]	NPTHQIYPVTQPLA		P05814	P05814 [205-218]	1578.83	23.24	60475.8	31759.5
[Y].VPFPPFSDISNPTAHENYEK.[N]	VPFPPFSDISNPTAHENYEK		P47710	P47710 [159-178]	2289.08	45.85	60445.3	43293.2
[P].VPDLVPGNF.[K]	VPDLVPGNF		P02671	P02671 [229-237]	957.504	47.2	60240.3	28863.5
[L].HLPLPLLQPLMQQVPQPIPQT.[L]	HLPLPLLQPLMQQVPQPIPQT	1xOxidation [M11]	P05814	P05814 [140-160]	2404.34	42.11	60194.9	31541.4
[S].KEIPLSPMGEDSAPRDADTLHSKLIPTQPSQGAP.[-]	KEIPLSPMGEDSAPRDADTLHSKLIPTQPSQGAP	1xOxidation [M8]	Q13410	Q13410 [493-526]	3599.8	24.94	60135.7	34283.1
[A].INNPYVPRTYYANPAVVRPHAQIPQR.[Q]	INNPYVPRTYYANPAVVRPHAQIPQR		P07498	P07498 [71-96]	3034.61	23.05	60115.7	56696.5
[N].LYQRRPAIAINNPYVPR.[T]	LYQRRPAIAINNPYVPR		P07498	P07498 [62-78]	2041.15	29.41	59983.7	59506.5
[E].SSEPIPLESREEYMNGMN.[R]	SSEPIPLESREEYMNGMN	1xPhospho [S9]; 2xOxidation [M14; M17]	P47710	P47710 [33-50]	2194.87	27.96	59853.7	25173.3
[V].DSGSSEEQGGSSRALVS.[T]	DSGSSEEQGGSSRALVS		P01833	P01833 [626-642]	1652.74	18.66	59753.2	17238.4
[L].GAVYTEGGFVEGVNKK.[L]	GAVYTEGGFVEGVNKK		P19835	P19835 [24-39]	1654.84	25.26	59667.5	31365.8
[P].LAQPAVVLPVPQPEIMEVPKAKDTVYTKGR.[V]	LAQPAVVLPVPQPEIMEVPKAKDTVYTKGR	1xOxidation [M16]	P05814	P05814 [84-113]	3290.82	33.57	59606.1	57755.1
[E].DEHQDKIYPSFQ.[P]	DEHQDKIYPSFQ		P05814	P05814 [49-60]	1506.69	26.35	59601.9	48382.6
[S].EEQGGSSRALVSTLV.[P]	EEQGGSSRALVSTLV		P01833	P01833 [631-645]	1532.79	35.78	59336.8	26011.6
[R].YPERLQNPSESSEPIP.[L]	YPERLQNPSESSEPIP	1xPhospho [S11]	P47710	P47710 [23-38]	1922.85	30.45	59114.3	24190.4
[P].AVVLPVPQPEIME.[V]	AVVLPVPQPEIME	1xOxidation [M12]	P05814	P05814 [88-100]	1437.77	46.61	58929.8	14902.8
[Y].VPNSYPYYGTNLY.[Q]	VPNSYPYYGTNLY		P07498	P07498 [51-63]	1550.72	32.99	58916.4	53897.9
[V].MPVLKSPTIPFFDPQIPKLTDLEN.[L]	MPVLKSPTIPFFDPQIPKLTDLEN	1xOxidation [M1]	P05814	P05814 [115-138]	2756.46	42.27	58782.8	29515.4
[E].SREEYMNGMNRQ.[R]	SREEYMNGMNRQ	1xPhospho [S1]	P47710	P47710 [41-52]	1594.61	12.16	58711.5	44861.9
[S].EPIPLESREEYMNGMN.[R]	EPIPLESREEYMNGMN		P47710	P47710 [35-50]	1908.85	26.34	58708.4	17599.2
[A].VPVQALLLNQELLLNPTHQIYPVTQPL.[A]	VPVQALLLNQELLLNPTHQIYPVTQPL		P05814	P05814 [191-217]	3051.72	43.67	58663.1	18576.7
[T].DLENLHLPLPLLQ.[P]	DLENLHLPLPLLQ		P05814	P05814 [135-147]	1514.86	43.73	58639.7	45160.8
[E].SSEPIPLESREEYMNGMN.[R]	SSEPIPLESREEYMNGMN	1xPhospho [S9]; 1xOxidation [M14]	P47710	P47710 [33-50]	2178.87	32	58504.1	24601.2
[E].SLSSSEESITEYKQKVE.[K]	SLSSSEESITEYKQKVE		P05814	P05814 [21-37]	1943.94	18.35	58237.1	42732.2
[A].DGPERVTVIANAQDLS.[K]	DGPERVTVIANAQDLS		Q13410	Q13410 [477-492]	1684.85	23.97	57990.1	26572.1
[E].DEHQDKIYPSFQP.[Q]	DEHQDKIYPSFQP		P05814	P05814 [49-61]	1603.74	22.29	57926.2	25639.6
[K].TGDPNMGDSAVPTHWEPYTTENSGYLEITK.[K]	TGDPNMGDSAVPTHWEPYTTENSGYLEITK		P19835	P19835 [494-523]	3310.48	38.52	57900.1	31692.5
[I].YPFVEPIPYGFLPQNILPLAQPAVVLPVPQPEIMEVPK.[A]	YPFVEPIPYGFLPQNILPLAQPAVVLPVPQPEIMEVPK	1xOxidation [M34]	P05814	P05814 [66-103]	4256.31	44.82	57874	38683.3
[L].NEYNQLQLQA.[A]	NEYNQLQLQA		P47710	P47710 [107-116]	1220.59	30.85	57809.3	44173.3
[S].ESSEPIPLESREEYMNGMN.[R]	ESSEPIPLESREEYMNGMN		P47710	P47710 [32-50]	2211.95	35.66	57675.3	14311.1
[F].DSDPITVTVPVEVS.[R]	DSDPITVTVPVEVS		P10909	P10909 [411-424]	1457.74	38.28	57597.2	55106.7
[N].QELLLNPTHQIYPV.[T]	QELLLNPTHQIYPV		P05814	P05814 [200-213]	1664.9	47.47	57583.5	49488
[R].RPNLHPSFIAIPPK.[K]	RPNLHPSFIAIPPK		P07498	P07498 [110-123]	1586.92	31.6	57335.2	56632.4
[D].ATDEDITSHMESEELNGAY.[K]	ATDEDITSHMESEELNGAY	1xPhospho [T/S]	P10451	P10451 [184-202]	2191.84	38.54	57274.6	18903
[E].SLSSSEESITEYK.[Q]	SLSSSEESITEYK	1xPhospho [S]	P05814	P05814 [21-33]	1539.65	28.47	57240.2	31235.3
[T].DEDITSHMESEELNGAY.[K]	DEDITSHMESEELNGAY		P10451	P10451 [186-202]	1939.79	34.3	57155.8	19575.2
[S].SEPIPLESREEYMNGMN.[R]	SEPIPLESREEYMNGMN		P47710	P47710 [34-50]	1995.88	27.82	56973.6	20609.9
[K].YLGPQYVAGITNLKK.[C]	YLGPQYVAGITNLKK		P02788	P02788 [681-695]	1664.94	37.48	56909.6	8811.89
[Y].VPFPPFSDISNPT.[A]	VPFPPFSDISNPT		P47710	P47710 [159-171]	1417.7	41.15	56835.8	50581.7
[D].GSRASVDSGSSEEQGGSSRALVST.[L]	GSRASVDSGSSEEQGGSSRALVST		P01833	P01833 [620-643]	2311.08	20.69	56556.8	36394.9
[V].VLPVPQPEIMEVPKAKD.[T]	VLPVPQPEIMEVPKAKD		P05814	P05814 [90-106]	1890.04	32.89	56406.4	43684
[L].QNPSESSEPIPLESREEYMNGMN.[R]	QNPSESSEPIPLESREEYMNGMN	1xPhospho [S14]	P47710	P47710 [28-50]	2718.11	31.94	56195.2	24512
[A].VPVQALLLNQELLLNPTHQ.[I]	VPVQALLLNQELLLNPTHQ		P05814	P05814 [191-209]	2140.21	42.42	56185.8	56185.8
[R].ETIESLSSSEESITEYKQKV.[E]	ETIESLSSSEESITEYKQKV		P05814	P05814 [17-36]	2287.12	36.72	56181	27924.4
[K].SPTIPFFDPQIPKLTDL.[E]	SPTIPFFDPQIPKLTDL		P05814	P05814 [120-136]	1929.04	43.85	56167.8	20815.4
[Q].YVPFPPFSDISNPTAHENYEKNNVM.[L]	YVPFPPFSDISNPTAHENYEKNNVM	1xOxidation [M25]	P47710	P47710 [158-182]	2926.34	47.88	56166.4	47750.9
[A].IPVKQADSGSSEEKQLYNKYPDAVA.[T]	IPVKQADSGSSEEKQLYNKYPDAVA	1xPhospho [S]	P10451	P10451 [17-41]	2817.33	27.92	55977.4	36501
[S].SEPIPLESREEYMNGMN.[R]	SEPIPLESREEYMNGMN	1xPhospho [S8]; 2xOxidation [M13; M16]	P47710	P47710 [34-50]	2107.83	27.99	55902.8	20993.7
[E].LLLNPTHQIY.[P]	LLLNPTHQIY		P05814	P05814 [202-211]	1211.68	30.04	55832.5	51777
[M].PVLKSPTIPFFDPQIPK.[L]	PVLKSPTIPFFDPQIPK		P05814	P05814 [116-132]	1924.09	48.97	55772.4	55772.4
[K].GIPFAAPTKALENPQPHPGWQGT.[L]	GIPFAAPTKALENPQPHPGWQGT		P19835	P19835 [52-74]	2414.23	34.27	55692.5	35535.9
[P].LAQPAVVLPVPQPEIMEVPKAKD.[T]	LAQPAVVLPVPQPEIMEVPKAKD	1xOxidation [M16]	P05814	P05814 [84-106]	2485.37	45.76	55583	46595.3
[L].FAEEKAVADTRDQADGSRASVD.[S]	FAEEKAVADTRDQADGSRASVD		P01833	P01833 [605-626]	2338.09	21.49	55385	16138.8
[D].IQYPDATDEDITSH.[M]	IQYPDATDEDITSH		P10451	P10451 [179-192]	1604.71	25.53	55339.5	17964.3
[K].NPKFMETVAE.[K]	NPKFMETVAE		P10909	P10909 [427-436]	1165.56	18.6	55231	50250.5
[C].HPNSPLDEENLTQENQD.[R]	HPNSPLDEENLTQENQD		P01011	P01011 [24-40]	1979.86	25.29	55210	43283.9
[R].LQNPSESSEPIPLESREEYMNG.[M]	LQNPSESSEPIPLESREEYMNG		P47710	P47710 [27-48]	2506.14	27.29	54882.4	19961
[Q].DPRLFAEEKAVADTR.[D]	DPRLFAEEKAVADTR		P01833	P01833 [601-615]	1717.89	19.02	54590.4	18805.9
[T].IESLSSSEESITEYKQKVEK.[V]	IESLSSSEESITEYKQKVEK	2xPhospho [S6; S7]	P05814	P05814 [19-38]	2474.1	28.23	54557.4	24160.8
[D].GSRASVDSGSSEEQGGSSRALVSTLVPLG.[L]	GSRASVDSGSSEEQGGSSRALVSTLVPLG		P01833	P01833 [620-648]	2790.39	45.14	54477.3	17442.3
[R].VMPVLKSPTIPFFDPQIPKLTDLENL.[H]	VMPVLKSPTIPFFDPQIPKLTDLENL	1xOxidation [M2]	P05814	P05814 [114-139]	2968.61	43.57	54464.1	51979.6
[A].IPVKQADSGSSEEKQLYNKYPDAVA.[T]	IPVKQADSGSSEEKQLYNKYPDAVA		P10451	P10451 [17-41]	2737.37	25.5	54441.8	38232
[S].ESSEPIPLES.[R]	ESSEPIPLES		P47710	P47710 [32-41]	1087.52	28.25	54409.2	24099.9
[S].HELDSASSEVN.[-]	HELDSASSEVN	1xPhospho [S]	P10451	P10451 [304-314]	1267.48	19.97	54216.7	16494.9
[Q].PLMQQVPQPIP.[Q]	PLMQQVPQPIP	1xOxidation [M3]	P05814	P05814 [148-158]	1263.68	23.77	53838.2	25095.8
[P].FVEPIPYGFLPQNILP.[L]	FVEPIPYGFLPQNILP		P05814	P05814 [68-83]	1844	52.44	53726.9	45682.8
[S].DISNPTAHENYEKNNVM.[L]	DISNPTAHENYEKNNVM	1xOxidation [M17]	P47710	P47710 [166-182]	1991.88	20.73	53708.7	29677.7
[S].APFDVIGPP.[E]	APFDVIGPP		Q13410	Q13410 [27-35]	912.483	37.19	53681.9	41727.2
[E].SSEPIPLESREEYMNGMN.[R]	SSEPIPLESREEYMNGMN		P47710	P47710 [33-50]	2082.91	27.03	53504.4	19157
[F].SDISNPTAHENYEKNNV.[M]	SDISNPTAHENYEKNNV		P47710	P47710 [165-181]	1931.87	21.07	53479.2	24140.2
[Q].DRFFTREPQDTYHYLP.[F]	DRFFTREPQDTYHYLP		P10909	P10909 [193-208]	2084.98	29.82	53356	49826.8
[K].LTDLENLHLPLPLLQPLMQQVPQPIPQT.[L]	LTDLENLHLPLPLLQPLMQQVPQPIPQT	1xOxidation [M18]	P05814	P05814 [133-160]	3202.75	44.06	53312.4	33394.5
[A].YPYAVWY.[Y]	YPYAVWY		P47710	P47710 [145-151]	961.445	40.27	53273.3	53273.3
[L].LNQELLL.[N]	LNQELLL		P05814	P05814 [198-204]	842.498	36.21	53231.8	48788.1
[A].VPVQALLLNQELLLNPTHQIY.[P]	VPVQALLLNQELLLNPTHQIY		P05814	P05814 [191-211]	2416.36	43.79	53183.5	46403.4
[G].DQTVSDNELQEMSNQGSKYVNKE.[I]	DQTVSDNELQEMSNQGSKYVNKE		P10909	P10909 [23-45]	2643.18	24.5	53166.1	44921.7
[E].SSEPIPLESREEYMNGMN.[R]	SSEPIPLESREEYMNGMN	2xOxidation [M14; M17]	P47710	P47710 [33-50]	2114.9	25.82	53113.8	21323.6
[S].EPIPLESREEYMNGMN.[R]	EPIPLESREEYMNGMN	1xPhospho [S7]; 2xOxidation [M12; M15]	P47710	P47710 [35-50]	2020.8	27.45	53057.8	24061.8
[L].LNQELLLNPTHQ.[I]	LNQELLLNPTHQ		P05814	P05814 [198-209]	1419.76	33.99	53017.1	40257.3
[L].NQELLLNPTHQI.[Y]	NQELLLNPTHQI		P05814	P05814 [199-210]	1419.76	38.71	52992.4	44253.5
[S].SEPIPLESREEYMNGMN.[R]	SEPIPLESREEYMNGMN	2xOxidation [M13; M16]	P47710	P47710 [34-50]	2027.87	25.6	52741.6	22855.8
[K].TLIEKTNEERKTLLSN.[L]	TLIEKTNEERKTLLSN		P10909	P10909 [58-73]	1889.03	25.88	52610.8	48978
[A].EEKAVADTRDQADGSRASVDSGSSEE.[Q]	EEKAVADTRDQADGSRASVDSGSSEE		P01833	P01833 [607-632]	2696.19	5.41	52547.8	17440.6
[S].HMESEELNGAY.[K]	HMESEELNGAY		P10451	P10451 [192-202]	1279.53	23.17	52482.8	19488.8
[N].QELLLNPTHQIYPVTQPL.[A]	QELLLNPTHQIYPVTQPL		P05814	P05814 [200-217]	2104.14	48.49	52457.8	21860
[P].QPEIMEVPKAKDTVYTKG.[R]	QPEIMEVPKAKDTVYTKG		P05814	P05814 [95-112]	2034.06	25.35	52253.5	50517.9
[P].TIPFFDPQIPKLTDLENLHLPLP.[L]	TIPFFDPQIPKLTDLENLHLPLP		P05814	P05814 [122-144]	2658.45	44.43	52242.5	40708.2
[R].NILREKQTDEI.[K]	NILREKQTDEI		P47710	P47710 [54-64]	1358.73	14.99	52104.7	31590.8
[G].SSEEQGGSSRALVSTLVPLG.[L]	SSEEQGGSSRALVSTLVPLG		P01833	P01833 [629-648]	1974.01	47.42	52030.2	14455.3
[S].HMESEELNGAY.[K]	HMESEELNGAY	1xPhospho [S4]	P10451	P10451 [192-202]	1359.49	25.02	51996	18963.1
[L].LLNQELLLNPTHQIYPVTQPLAP.[V]	LLNQELLLNPTHQIYPVTQPLAP		P05814	P05814 [197-219]	2612.44	49.89	51911.1	38159.1
[L].NPQDKDGSFSVVITG.[L]	NPQDKDGSFSVVITG		P01833	P01833 [300-314]	1563.76	32.71	51365	50239.2
[P].VPQPEIMEVPKAKDTVYTKG.[R]	VPQPEIMEVPKAKDTVYTKG		P05814	P05814 [93-112]	2230.18	20.64	51333	37545.7
[I].ESLSSSEESITEY.[K]	ESLSSSEESITEY		P05814	P05814 [20-32]	1460.63	30.76	51320.6	26782.1
[L].FAEEKAVADTRDQADG.[S]	FAEEKAVADTRDQADG		P01833	P01833 [605-620]	1722.79	20.04	51312.6	14703.5
[I].QDPRLFAEEKAVADTRDQADGS.[R]	QDPRLFAEEKAVADTRDQADGS		P01833	P01833 [600-621]	2419.15	31.05	51259.6	22577.8
[S].DISNPTAHENY.[E]	DISNPTAHENY		P47710	P47710 [166-176]	1260.55	13.44	51168.1	32760.3
[Y].GFLPQNILPLAQPAVVLPVPQPEIMEVPKAKDTVYTKG.[R]	GFLPQNILPLAQPAVVLPVPQPEIMEVPKAKDTVYTKG		P05814	P05814 [75-112]	4098.27	42.89	51005.5	51005.5
[T].LALPPQPLWSVPQP.[K]	LALPPQPLWSVPQP		P05814	P05814 [161-174]	1542.87	42.24	50917.8	39507.8
[R].VTTVASHTSDSDVPSGVTEVVVK.[L]	VTTVASHTSDSDVPSGVTEVVVK		P10909	P10909 [386-408]	2314.18	28.72	50908.3	48237.6
[D].IQYPDATDEDITS.[H]	IQYPDATDEDITS		P10451	P10451 [179-191]	1467.65	27.94	50880.1	21993.7
[R].GAKTTFDVYTESWAQDPSQENK.[K]	GAKTTFDVYTESWAQDPSQENK		P19835	P19835 [379-400]	2502.14	27.79	50811.2	46339.3
[E].ESITEYKQKVE.[K]	ESITEYKQKVE		P05814	P05814 [27-37]	1353.69	20.74	50654.2	11436.9
[P].QTLALPPQP.[L]	QTLALPPQP		P05814	P05814 [159-167]	964.546	31.21	50436.7	15083.8
[F].FDPQIPKLTDLE.[N]	FDPQIPKLTDLE		P05814	P05814 [126-137]	1415.74	40.17	50368	38822.7
[K].VKHEDQQQGEDEHQD.[K]	VKHEDQQQGEDEHQD		P05814	P05814 [39-53]	1821.76	1.47	50083.6	23172.2
[Q].RQYLPNSHPPTVV.[R]	RQYLPNSHPPTVV		P07498	P07498 [96-108]	1507.8	17.3	49987.1	48909.1
[L].MQQVPQPIPQTL.[A]	MQQVPQPIPQTL		P05814	P05814 [150-161]	1379.74	39.27	49958.5	28376.4
[A].SGEKDLAPPSEPSESFQEHTVDGENQ.[I]	SGEKDLAPPSEPSESFQEHTVDGENQ		P24821	P24821 [72-97]	2814.23	25.92	49928.7	43764.8
[I].YPSFQPQPLI.[Y]	YPSFQPQPLI		P05814	P05814 [56-65]	1189.63	48.16	49890.6	24181.2
[T].IPFFDPQIPKLTDLENLHLPLP.[L]	IPFFDPQIPKLTDLENLHLPLP		P05814	P05814 [123-144]	2557.41	44.39	49749.7	32870.6
[A].VPVQALLLNQELLLNPTHQIYP.[V]	VPVQALLLNQELLLNPTHQIYP		P05814	P05814 [191-212]	2513.41	43.31	49587.7	39555.6
[A].RETIESLSSSEESITEYKQKVEKVKHEDQQQGEDEHQDK.[I]	RETIESLSSSEESITEYKQKVEKVKHEDQQQGEDEHQDK	2xPhospho [S9; S10]	P05814	P05814 [16-54]	4791.13	26.1	49312.1	49312.1
[R].RMNENSHVQVPF.[Q]	RMNENSHVQVPF		P47710	P47710 [125-136]	1457.7	28.01	49220.3	47708.5
[S].ESSEPIPLESREEYMNGMN.[R]	ESSEPIPLESREEYMNGMN	2xOxidation [M15; M18]	P47710	P47710 [32-50]	2243.94	26.26	49199.5	23457.9
[E].SSEPIPLESREEYMNGMN.[R]	SSEPIPLESREEYMNGMN	1xOxidation [M]	P47710	P47710 [33-50]	2098.91	29.59	49097.6	24362.4
[Q].VPQPIPQTLALPP.[Q]	VPQPIPQTLALPP		P05814	P05814 [153-165]	1370.8	39.43	48740.8	24836.4
[G].SRDVSLAKADAAPDEKVLDSGFREIEN.[K]	SRDVSLAKADAAPDEKVLDSGFREIEN		P01833	P01833 [570-596]	2932.46	28.99	48665	24424.2
[A].IAINNPYVPRT.[Y]	IAINNPYVPRT		P07498	P07498 [69-79]	1257.69	22.6	48637.4	42549.7
[Y].YPQIMQYVPFPPFSDISNPTAHEN.[Y]	YPQIMQYVPFPPFSDISNPTAHEN		P47710	P47710 [152-175]	2792.3	43.74	48595.4	46454.4
[S].EPIPLESREEYMNGMN.[R]	EPIPLESREEYMNGMN	2xOxidation [M12; M15]	P47710	P47710 [35-50]	1940.84	25.15	48301.5	22293.6
[Y].YPQIMQYVPFPPFSDISNPTAHENYE.[K]	YPQIMQYVPFPPFSDISNPTAHENYE		P47710	P47710 [152-177]	3084.41	43.48	48284.8	36582.7
[L].TDLENLHLPLPLLQ.[P]	TDLENLHLPLPLLQ		P05814	P05814 [134-147]	1615.91	43.42	48270.2	37682.9
[Y].TEGGFVEGVNK.[K]	TEGGFVEGVNK		P19835	P19835 [28-38]	1136.56	13.81	48260.8	29985.7
[D].AAPDEKVLDSGFREIEN.[K]	AAPDEKVLDSGFREIEN		P01833	P01833 [580-596]	1889.92	26.68	48069.6	14761.7
[D].GSRASVDSGSSEEQGGSSRALVSTLVP.[L]	GSRASVDSGSSEEQGGSSRALVSTLVP		P01833	P01833 [620-646]	2620.28	37.59	47942.2	13428.6
[Q].NPSESSEPIPLESREEYMNGMN.[R]	NPSESSEPIPLESREEYMNGMN	2xPhospho [S6; S13]; 1xOxidation [M]	P47710	P47710 [29-50]	2686.01	27.45	47832.2	19409.6
[E].IMEVPKAKDTVYTKG.[R]	IMEVPKAKDTVYTKG	1xOxidation [M2]	P05814	P05814 [98-112]	1695.9	19.72	47806.3	22563.9
[V].PQPEIMEVPKAKDTVYT.[K]	PQPEIMEVPKAKDTVYT	1xOxidation [M6]	P05814	P05814 [94-110]	1961.99	39.37	47718.1	44532.5
[F].EDLSDEAERDEY.[E]	EDLSDEAERDEY		P02788	P02788 [235-246]	1470.59	23.41	47697.3	11986.7
[L].GAVYTEGGFVEGVNK.[K]	GAVYTEGGFVEGVNK		P19835	P19835 [24-38]	1526.75	28.28	47574.3	22890.1
[P].AVVLPVPQPE.[I]	AVVLPVPQPE		P05814	P05814 [88-97]	1048.6	38.57	47338.3	13744.4
[P].DIQYPDATDEDITSHMESEELNGA.[Y]	DIQYPDATDEDITSHMESEELNGA	1xOxidation [M16]	P10451	P10451 [178-201]	2696.12	33.55	46714.9	16145.8
[D].SGSSEEQGGSSRALVSTLVP.[L]	SGSSEEQGGSSRALVSTLVP		P01833	P01833 [627-646]	1947.96	40.51	46703.7	12526
[T].EGGFVEGVN.[K]	EGGFVEGVN		P19835	P19835 [29-37]	907.416	16.84	46443.7	33309
[Y].ETSQLDDQSAETHSHKQSRLY.[K]	ETSQLDDQSAETHSHKQSRLY	1xPhospho [S9]	P10451	P10451 [226-246]	2540.1	20.31	46341	31378.1
[R].NILREKQTDEIKDT.[R]	NILREKQTDEIKDT	1xPhospho [T8]	P47710	P47710 [54-67]	1782.86	13.19	46056.1	33648.1
[F].DPQIPKLTDLE.[N]	DPQIPKLTDLE		P05814	P05814 [127-137]	1268.67	42.72	46043.9	25595.2
[R].TYYANPAVVRPHA.[Q]	TYYANPAVVRPHA		P07498	P07498 [79-91]	1458.75	15.42	46015.8	46015.8
[A].RETIESLSSSEESITEYKQKVEKVKHEDQQQG.[E]	RETIESLSSSEESITEYKQKVEKVKHEDQQQG	1xPhospho [S10]	P05814	P05814 [16-47]	3829.81	18.89	45952.3	28352
[L].QPLMQQVPQPIPQTL.[A]	QPLMQQVPQPIPQTL	1xOxidation [M4]	P05814	P05814 [147-161]	1733.93	33.45	45817.2	23673.4
[E].LQEMSNQGSKYVNKEIQNAVNGVK.[Q]	LQEMSNQGSKYVNKEIQNAVNGVK		P10909	P10909 [31-54]	2678.36	28.2	45760.9	44146.6
[A].KADAAPDEKVLDSGFREIEN.[K]	KADAAPDEKVLDSGFREIEN		P01833	P01833 [577-596]	2204.08	24.88	45735.1	26843.2
[R].ETIESLSSSEESIT.[E]	ETIESLSSSEESIT		P05814	P05814 [17-30]	1511.7	25.18	45721	22704.9
[K].HLKFRISHELDSASSEVN.[-]	HLKFRISHELDSASSEVN	2xPhospho [S7; S12]	P10451	P10451 [297-314]	2228.97	30.58	45641.3	34336.3
[A].DGSRASVDSGSSEEQGGSSRALV.[S]	DGSRASVDSGSSEEQGGSSRALV		P01833	P01833 [619-641]	2238.02	13.67	45640.3	28200.2
[A].DSGSSEEKQLYNKYPDAV.[A]	DSGSSEEKQLYNKYPDAV		P10451	P10451 [23-40]	2029.93	26.38	45344.6	45344.6
[S].APFDVIGPPEPIL.[A]	APFDVIGPPEPIL		Q13410	Q13410 [27-39]	1364.75	50.98	45195.1	11864.1
[K].LTDLENLHLPLPLLQPLMQQVPQPIPQT.[L]	LTDLENLHLPLPLLQPLMQQVPQPIPQT		P05814	P05814 [133-160]	3186.76	44.58	45146.9	34068.7
[S].RALVSTLVPLG.[L]	RALVSTLVPLG		P01833	P01833 [638-648]	1125.7	46.55	45039	28142
[A].VPVQALLLN.[Q]	VPVQALLLN		P05814	P05814 [191-199]	966.598	38.43	44973.9	35635
[L].HLPLPLLQPLMQQVPQPIPQT.[L]	HLPLPLLQPLMQQVPQPIPQT		P05814	P05814 [140-160]	2388.35	43.2	44966.2	37229
[V].TTVASHTSDSDVPSGVTEVVVK.[L]	TTVASHTSDSDVPSGVTEVVVK		P10909	P10909 [387-408]	2215.11	27.48	44884.4	44884.4
[A].IPVKQADSGSSEEKQLYNKYPDAVAT.[W]	IPVKQADSGSSEEKQLYNKYPDAVAT	3xPhospho [S8; S10; S11]	P10451	P10451 [17-42]	3078.31	32.64	44817.1	25699.5
[L].LNPTHQIYPVTQPLAPV.[H]	LNPTHQIYPVTQPLAPV		P05814	P05814 [204-220]	1888.03	42.9	44717.5	36534
[L].KSPTIPFFDPQIPKLTDLEN.[L]	KSPTIPFFDPQIPKLTDLEN		P05814	P05814 [119-138]	2300.22	41.99	44601.1	28758.6
[E].QIRRMNENSHVQVPFQQ.[L]	QIRRMNENSHVQVPFQQ	1xOxidation [M5]	P47710	P47710 [122-138]	2127.05	15.04	44350.7	44350.7
[A].INNPYVPRTYYANPA.[V]	INNPYVPRTYYANPA		P07498	P07498 [71-85]	1752.87	23.61	44341.9	44341.9
[S].ESSEPIPLESREEYMNGMN.[R]	ESSEPIPLESREEYMNGMN	1xPhospho [S10]; 2xOxidation [M15; M18]	P47710	P47710 [32-50]	2323.91	28.31	44250.3	29621.3
[A].IPVAQDLNAPSDWDS.[R]	IPVAQDLNAPSDWDS		P10451	P10451 [205-219]	1627.76	34.09	44233.7	23284.3
[D].PRLFAEEKAVADTRDQADGS.[R]	PRLFAEEKAVADTRDQADGS		P01833	P01833 [602-621]	2176.06	23.65	44204.9	33010.3
[Q].DPRLFAEEKAVAD.[T]	DPRLFAEEKAVAD		P01833	P01833 [601-613]	1460.74	27.25	44155.4	14930.2
[Q].DLNAPSDWDSRGKD.[S]	DLNAPSDWDSRGKD		P10451	P10451 [210-223]	1575.7	23.81	44004.8	26199.3
[R].LPEVEVPQHL.[-]	LPEVEVPQHL		Q02818	Q02818 [452-461]	1160.63	30.87	43962	28316.5
[W].SVPQPKVLPIPQQVVPYPQRAVPVQA.[L]	SVPQPKVLPIPQQVVPYPQRAVPVQA		P05814	P05814 [170-195]	2835.62	39.23	43944.8	43944.8
[F].DVIGPPEPIL.[A]	DVIGPPEPIL		Q13410	Q13410 [30-39]	1049.59	48.18	43900.2	16065.2
[Q].YVPFPPFSDI.[S]	YVPFPPFSDI		P47710	P47710 [158-167]	1181.59	43.7	43623.9	42139.2
[Q].QVVPYPQRAVPVQ.[A]	QVVPYPQRAVPVQ		P05814	P05814 [182-194]	1480.83	25.92	43388.9	39753.3
[Y].LPNSHPPTVVRRPNLHP.[S]	LPNSHPPTVVRRPNLHP		P07498	P07498 [99-115]	1931.07	23.04	43303.5	43303.5
[L].ALPPQPLWSVPQPK.[V]	ALPPQPLWSVPQPK		P05814	P05814 [162-175]	1557.88	35.78	43191.5	37325.6
[P].VQALLLNQE.[L]	VQALLLNQE		P05814	P05814 [193-201]	1027.58	25.71	43167.6	19727
[R].LQNPSESSEPIPLESREEYM.[N]	LQNPSESSEPIPLESREEYM	2xPhospho [S8; S15]	P47710	P47710 [27-46]	2495.01	44.92	43157.5	31728.9
[A].IAINNPYVPRTYYANPAVVRPHAQIP.[Q]	IAINNPYVPRTYYANPAVVRPHAQIP		P07498	P07498 [69-94]	2934.57	35.21	43122.2	43122.2
[L].NPTHQIYPVTQPLAPVHN.[P]	NPTHQIYPVTQPLAPVHN		P05814	P05814 [205-222]	2026.05	21.87	42619.6	35626.1
[R].RPDIQYPDATDEDITSHMESEELNGA.[Y]	RPDIQYPDATDEDITSHMESEELNGA	1xOxidation [M18]	P10451	P10451 [176-201]	2949.27	30.66	42614.3	19101.8
[R].TLDPERLGREGVQKEDIPPAD.[L]	TLDPERLGREGVQKEDIPPAD		P01024	P01024 [946-966]	2335.19	27.18	42431.3	39326.3
[R].HPYFYAPELLFFAK.[R]	HPYFYAPELLFFAK		P02768	P02768 [170-183]	1742.89	50.77	42409.2	9570.48
[N].PAVVRPHAQIP.[Q]	PAVVRPHAQIP		P07498	P07498 [84-94]	1184.69	15.04	42402.6	41791.4
[S].SISSSSEEMSLS.[K]	SISSSSEEMSLS		P47710	P47710 [86-97]	1243.54	26.79	42230.4	27046.9
[R].VMPVLKSPTIPFFDPQIP.[K]	VMPVLKSPTIPFFDPQIP		P05814	P05814 [114-131]	2026.11	43.28	42090.5	24337.1
[Y].GFLPQNILPLAQPAVVLPVPQPEIMEVPK.[A]	GFLPQNILPLAQPAVVLPVPQPEIMEVPK	1xOxidation [M25]	P05814	P05814 [75-103]	3150.76	43.67	42035.6	21096.7
[K].VEKVKHEDQQQGEDEHQDKIYPSFQPQ.[P]	VEKVKHEDQQQGEDEHQDKIYPSFQPQ		P05814	P05814 [36-62]	3266.53	23.67	41942.5	37784.2
[L].DSGFREIE.[N]	DSGFREIE		P01833	P01833 [588-595]	952.437	15.31	41939.6	36373.5
[R].RMNENSHVQVPFQQLNQ.[L]	RMNENSHVQVPFQQLNQ	1xOxidation [M2]	P47710	P47710 [125-141]	2084.99	29.44	41914.1	37548.2
[L].FAEEKAVADTRDQADGSRASVDSGSSEEQGGSSRALV.[S]	FAEEKAVADTRDQADGSRASVDSGSSEEQGGSSRALV		P01833	P01833 [605-641]	3769.75	24.21	41816.7	21465.1
[S].CNIPSPPPLPCTESSSSMPGLGMVPPPPPPLPGMTVPTLPSTAIPQ.[P]	CNIPSPPPLPCTESSSSMPGLGMVPPPPPPLPGMTVPTLPSTAIPQ	2xPhospho [T12; S41]; 1xOxidation [M23]	Q9NZ56	Q9NZ56 [853-898]	4763.2	34.19	41687.7	30093.3
[A].RETIESLSSSEESITEYKQ.[K]	RETIESLSSSEESITEYKQ	1xPhospho [S/T]	P05814	P05814 [16-34]	2296.02	29.54	41595.3	19682.8
[R].RPDIQYPDATDEDITS.[H]	RPDIQYPDATDEDITS		P10451	P10451 [176-191]	1835.83	27.59	41452.2	15509
[Q].GEDEHQDKIYPSF.[Q]	GEDEHQDKIYPSF		P05814	P05814 [47-59]	1564.69	28.08	41388.7	18112.8
[T].NPAVAATSANL.[-]	NPAVAATSANL		P15941	P15941 [1245-1255]	1028.54	24.89	41108.1	23385.6
[Y].VPMYYVPNSYPYYGTN.[L]	VPMYYVPNSYPYYGTN	1xOxidation [M3]	P07498	P07498 [46-61]	1943.85	31.6	41090.2	27136.9
[K].AIQDPRLFAEEKAVAD.[T]	AIQDPRLFAEEKAVAD		P01833	P01833 [598-613]	1772.92	24.2	41073.4	22583.2
[R].SEETKENEGFTVTAEGK.[G]	SEETKENEGFTVTAEGK		P01024	P01024 [1321-1337]	1855.86	21.58	41059	21612.3
[A].IQDPRLFAEE.[K]	IQDPRLFAEE		P01833	P01833 [599-608]	1217.62	31.61	41056.7	15830.8
[E].RLQNPSESSEPIPLESREE.[Y]	RLQNPSESSEPIPLESREE		P47710	P47710 [26-44]	2197.07	25.99	41009.7	17291.1
[P].LMQQVPQPIPQTLALPPQPLWSVPQPK.[V]	LMQQVPQPIPQTLALPPQPLWSVPQPK	1xOxidation [M2]	P05814	P05814 [149-175]	3047.68	41.88	40879.3	33215.2
[Q].TLALPPQPLWSVPQ.[P]	TLALPPQPLWSVPQ		P05814	P05814 [160-173]	1546.86	41.92	40806.8	40071.6
[Q].TLALPPQPLWSVP.[Q]	TLALPPQPLWSVP		P05814	P05814 [160-172]	1418.8	50.77	40561.3	29963.4
[L].QNPSESSEPIPLE.[S]	QNPSESSEPIPLE		P47710	P47710 [28-40]	1426.67	30.2	40530.8	11760.4
[P].LLQPLMQQVPQPIPQTLALPPQ.[P]	LLQPLMQQVPQPIPQTLALPPQ		P05814	P05814 [145-166]	2450.38	42.21	40475.3	23490.2
[Q].DKDGSFSVVITG.[L]	DKDGSFSVVITG		P01833	P01833 [303-314]	1224.61	26.01	40437	40437
[R].RPNLHPSFIAIPP.[K]	RPNLHPSFIAIPP		P07498	P07498 [110-122]	1458.82	41.27	40317.3	40317.3
[S].DYFQAPSD.[Y]	DYFQAPSD		Q08380	Q08380 [445-452]	942.384	26.73	40197.1	29980.6
[L].PLAQPAVVLPVPQPEIMEVPK.[A]	PLAQPAVVLPVPQPEIMEVPK		P05814	P05814 [83-103]	2252.27	41.54	40184.7	15636.4
[I].LPLAQPAVVLPVPQP.[E]	LPLAQPAVVLPVPQP		P05814	P05814 [82-96]	1538.93	41.72	40020.2	21970.7
[R].RPDIQYPDATDEDITSHMESEELNGAY.[K]	RPDIQYPDATDEDITSHMESEELNGAY	2xPhospho [T10; S20]; 1xOxidation [M18]	P10451	P10451 [176-202]	3272.27	39.35	39990.9	16422.3
[R].LQNPSESSEPIPLESREEYM.[N]	LQNPSESSEPIPLESREEYM	1xPhospho [S15]	P47710	P47710 [27-46]	2415.04	41.71	39852.3	22501.5
[S].DQVPDTESET.[R]	DQVPDTESET		P01024	P01024 [969-978]	1120.46	17.98	39781.5	29557.1
[E].QGGSSRALVSTLVPLG.[L]	QGGSSRALVSTLVPLG		P01833	P01833 [633-648]	1541.86	39.08	39603.8	25070.2
[A].DSGSSEEKQLYNKYPDA.[V]	DSGSSEEKQLYNKYPDA		P10451	P10451 [23-39]	1930.87	15.61	39472.1	39472.1
[A].VPVQALLLNQELLLNPTHQIYPVTQPLAPVHNPISV.[-]	VPVQALLLNQELLLNPTHQIYPVTQPLAPVHNPISV		P05814	P05814 [191-226]	3966.22	43.25	39352.2	28085.5
[R].ITGLDPAGPNFEYAEAPS.[R]	ITGLDPAGPNFEYAEAPS		P06858	P06858 [179-196]	1848.87	43.26	39230.5	35170.6
[L].LLNQELL.[L]	LLNQELL		P05814	P05814 [197-203]	842.498	33.69	39164.6	15363.2
[A].IPVKQADSGSSEEKQLY.[N]	IPVKQADSGSSEEKQLY	1xPhospho [S]	P10451	P10451 [17-33]	1958.91	15.83	39133.7	23202.4
[S].DISNPTAHENYEKNNVMLQ.[W]	DISNPTAHENYEKNNVMLQ		P47710	P47710 [166-184]	2217.02	26.42	38878.1	26356.2
[I].PVAQDLNAPSDWDSRGKDS.[Y]	PVAQDLNAPSDWDSRGKDS		P10451	P10451 [206-224]	2057.95	25.74	38795.9	26982.4
[L].NQELLLNPTHQIYPVTQ.[P]	NQELLLNPTHQIYPVTQ		P05814	P05814 [199-215]	2008.05	44.4	38662.7	21707.3
[Q].ELLLNPTHQIYPVTQPLAPVHNPI.[S]	ELLLNPTHQIYPVTQPLAPVHNPI		P05814	P05814 [201-224]	2704.48	48.49	38634.1	38634.1
[K].TGDPNMGDSAVPTHWEPYTTENSGYLE.[I]	TGDPNMGDSAVPTHWEPYTTENSGYLE		P19835	P19835 [494-520]	2968.26	45.6	38626.2	32817
[R].QYLPNSHPPTVVRRPNLHPSF.[I]	QYLPNSHPPTVVRRPNLHPSF		P07498	P07498 [97-117]	2456.29	21.67	38372.5	38372.5
[M].ASVAVDPQPSVVTR.[V]	ASVAVDPQPSVVTR	1xAcetyl [N-Term]	Q99541	Q99541 [2-15]	1467.78	29.07	38105.8	17790.9
[F].VEPIPYGFLPQNILPLAQPAVVLPVPQPEIMEVPK.[A]	VEPIPYGFLPQNILPLAQPAVVLPVPQPEIMEVPK		P05814	P05814 [69-103]	3833.13	44.64	37924.1	26103
[P].SESSEPIPLESREEYMNGMN.[R]	SESSEPIPLESREEYMNGMN	2xPhospho [S4; S11]	P47710	P47710 [31-50]	2458.92	35.61	37827.2	23335.6
[K].KVNRITGLDPAGPNFEYAEAPS.[R]	KVNRITGLDPAGPNFEYAEAPS		P06858	P06858 [175-196]	2346.17	28.93	37826.9	32817.8
[P].AVVLPVPQPEIMEVPKAKDTV.[Y]	AVVLPVPQPEIMEVPKAKDTV		P05814	P05814 [88-108]	2260.26	39.73	37646.1	34260.8
[R].RPDIQYPDATDEDIT.[S]	RPDIQYPDATDEDIT		P10451	P10451 [176-190]	1748.8	28.41	37629.8	17634.5
[P].THQIYPVTQP.[L]	THQIYPVTQP		P05814	P05814 [207-216]	1183.61	16.05	37506.5	17108.8
[P].RLFAEEKAVA.[D]	RLFAEEKAVA		P01833	P01833 [603-612]	1133.63	23.15	37500.8	30292.1
[R].RPDIQYPDATDEDITSHMESEE.[L]	RPDIQYPDATDEDITSHMESEE		P10451	P10451 [176-197]	2578.09	25.31	37476.3	16557
[P].LESREEYMNGMN.[R]	LESREEYMNGMN	1xPhospho [S3]; 1xOxidation [M8]	P47710	P47710 [39-50]	1568.58	21.09	37360.7	20421.1
[R].VPDVLVADPPIA.[R]	VPDVLVADPPIA		Q14697	Q14697 [115-126]	1205.68	39.12	37294.2	26734.2
[L].IYPFVEPIPYGFLPQNILPLAQPAVVLPVPQPEIMEVPK.[A]	IYPFVEPIPYGFLPQNILPLAQPAVVLPVPQPEIMEVPK		P05814	P05814 [65-103]	4353.4	44.93	37230.8	26719.8
[P].IPQQVVPYPQRAVPVQ.[A]	IPQQVVPYPQRAVPVQ		P05814	P05814 [179-194]	1819.02	32.92	37155.8	20125.2
[K].DSYETSQLDDQSAETHSH.[K]	DSYETSQLDDQSAETHSH		P10451	P10451 [223-240]	2049.83	12.35	37146.5	24311.2
[T].HQIYPVTQP.[L]	HQIYPVTQP		P05814	P05814 [208-216]	1082.56	23.63	37031.5	13353
[H].EDQQQGEDEHQDKIYPSFQPQ.[P]	EDQQQGEDEHQDKIYPSFQPQ		P05814	P05814 [42-62]	2546.11	28.43	36876.3	25117
[D].IQYPDATDEDITSHMESEELNGAYK.[A]	IQYPDATDEDITSHMESEELNGAYK		P10451	P10451 [179-203]	2856.25	39.46	36747	16866.2
[A].IPVKQADSGSSEEKQLYNKYPDAV.[A]	IPVKQADSGSSEEKQLYNKYPDAV	1xPhospho [S11]	P10451	P10451 [17-40]	2746.3	28.38	36681	33146.6
[S].EEQGGSSRALVSTLVPL.[G]	EEQGGSSRALVSTLVPL		P01833	P01833 [631-647]	1742.93	48.34	36668.3	14111.4
[D].EHQDKIYPSF.[Q]	EHQDKIYPSF		P05814	P05814 [50-59]	1263.6	26.83	36662.5	18285.2
[M].ETVAEKALQEY.[R]	ETVAEKALQEY		P10909	P10909 [432-442]	1280.64	31.37	36601.7	24268.2
[R].DQADGSRASVDSGSSEEQGGSSRALVSTLVPLGLV.[L]	DQADGSRASVDSGSSEEQGGSSRALVSTLVPLGLV		P01833	P01833 [616-650]	3431.69	50.39	36541.2	19474.9
[R].RPDIQYPDATDEDITSHMESEELNG.[A]	RPDIQYPDATDEDITSHMESEELNG	1xPhospho [S/T]	P10451	P10451 [176-200]	2942.2	32.34	36527.6	14514.3
[T].IESLSSSEESITEYKQKV.[E]	IESLSSSEESITEYKQKV	2xPhospho [S]	P05814	P05814 [19-36]	2216.96	33.14	36489	13507.3
[M].QYVPFPPFSDISNPTAHENYEKNN.[V]	QYVPFPPFSDISNPTAHENYEKNN		P47710	P47710 [157-180]	2808.29	39.94	36487.3	36487.3
[L].QPLMQQVPQPIPQTLALPPQPLWSVPQP.[K]	QPLMQQVPQPIPQTLALPPQPLWSVPQP		P05814	P05814 [147-174]	3128.7	43.31	36475.1	30887.8
[S].LSSSEESITEYKQKVE.[K]	LSSSEESITEYKQKVE		P05814	P05814 [22-37]	1856.91	24.5	36458.3	16148.6
[L].MQQVPQPIPQTL.[A]	MQQVPQPIPQTL	1xOxidation [M1]	P05814	P05814 [150-161]	1395.73	35.73	36448	15349.5
[L].PVPQPEIMEVPKAKDTV.[Y]	PVPQPEIMEVPKAKDTV		P05814	P05814 [92-108]	1878	33.41	36413.1	31817.9
[P].DIQYPDATDEDIT.[S]	DIQYPDATDEDIT		P10451	P10451 [178-190]	1495.64	31.59	36389.3	13408.3
[T].IPFFDPQIPKLTD.[L]	IPFFDPQIPKLTD		P05814	P05814 [123-135]	1530.82	41.9	36361.1	25937
[S].YPYYGTNLYQRRPAIA.[I]	YPYYGTNLYQRRPAIA		P07498	P07498 [55-70]	1945.99	24.97	36342	34026.4
[S].VDSGSSEEQGGSSRALVSTL.[V]	VDSGSSEEQGGSSRALVSTL		P01833	P01833 [625-644]	1965.94	29.65	36313.9	19202.8
[K].VKHEDQQQGEDEHQDKIYP.[S]	VKHEDQQQGEDEHQDKIYP		P05814	P05814 [39-57]	2323.06	11.18	36310.4	18318.7
[Q].GEDEHQDKIYPSFQ.[P]	GEDEHQDKIYPSFQ		P05814	P05814 [47-60]	1692.75	25.66	36167.5	15927.5
[P].SESSEPIPLE.[S]	SESSEPIPLE		P47710	P47710 [31-40]	1087.52	29.57	36113.6	18397.4
[R].LQNPSESSEPIPLESREEYMNG.[M]	LQNPSESSEPIPLESREEYMNG	2xPhospho [S8; S15]; 1xOxidation [M20]	P47710	P47710 [27-48]	2682.07	26.36	36103.8	32139.1
[Q].GEDEHQDKIYPSFQP.[Q]	GEDEHQDKIYPSFQP		P05814	P05814 [47-61]	1789.8	29.15	35788.5	12241.3
[I].SNPTAHENYEKNNVMLQW.[-]	SNPTAHENYEKNNVMLQW	1xOxidation [M15]	P47710	P47710 [168-185]	2190.99	30.7	35704.9	14066.3
[A].IPVKQADSGSSEEKQLYNKYPDAV.[A]	IPVKQADSGSSEEKQLYNKYPDAV		P10451	P10451 [17-40]	2666.33	25.9	35533.3	29832.2
[P].LIYPFVEPIPYGFLPQNILPLAQPAVVLPVPQPEIMEVPK.[A]	LIYPFVEPIPYGFLPQNILPLAQPAVVLPVPQPEIMEVPK	1xOxidation [M36]	P05814	P05814 [64-103]	4482.48	45.09	35525.6	24396.7
[K].AIPVAQDLNAPSDWDS.[R]	AIPVAQDLNAPSDWDS		P10451	P10451 [204-219]	1698.8	37.29	35451	20614.2
[P].LLQPLMQQVPQPIPQTLALPPQ.[P]	LLQPLMQQVPQPIPQTLALPPQ	1xOxidation [M6]	P05814	P05814 [145-166]	2466.38	41	35426.3	25924.9
[V].LPVPQPEIMEVPKAK.[D]	LPVPQPEIMEVPKAK	1xOxidation [M9]	P05814	P05814 [91-105]	1691.94	28.75	35422.6	16977.5
[R].EKQTDEIKDTR.[N]	EKQTDEIKDTR		P47710	P47710 [58-68]	1362.69	1.49	35250.9	25226.6
[N].DESNEHSDVIDSQE.[L]	DESNEHSDVIDSQE		P10451	P10451 [252-265]	1603.64	11.19	35249.9	32701.6
[S].LSSSEESITEYKQKVEKV.[K]	LSSSEESITEYKQKVEKV		P05814	P05814 [22-39]	2084.08	26.06	35216.2	35216.2
[Y].YLAGRDLSRLPQ.[L]	YLAGRDLSRLPQ		P15291	P15291 [41-52]	1388.76	17.91	35132.4	32684.4
[P].DIQYPDATDEDITSHMESEELNGA.[Y]	DIQYPDATDEDITSHMESEELNGA	1xPhospho [T/S]	P10451	P10451 [178-201]	2760.09	46.5	34913.8	13561.7
[S].LSSSEESITEYKQKVEKVKHEDQQQG.[E]	LSSSEESITEYKQKVEKVKHEDQQQG		P05814	P05814 [22-47]	3034.5	23.23	34859.1	23691.1
[Y].VPFPPFSDISNP.[T]	VPFPPFSDISNP		P47710	P47710 [159-170]	1316.65	49.54	34761.1	25182.7
[T].HQIYPVTQPLAPVHNP.[I]	HQIYPVTQPLAPVHNP		P05814	P05814 [208-223]	1810.96	21.7	34609.7	34609.7
[S].EESITEYKQKV.[E]	EESITEYKQKV		P05814	P05814 [26-36]	1353.69	13.92	34597.9	24305.9
[V].AQDLNAPSDWDSRGKDSYETSQLDDQSAETHSHKQSRLY.[K]	AQDLNAPSDWDSRGKDSYETSQLDDQSAETHSHKQSRLY	2xPhospho [S12; S17]	P10451	P10451 [208-246]	4625.95	20	34597.5	24684.5
[V].LDSGFREIEN.[K]	LDSGFREIEN		P01833	P01833 [587-596]	1179.56	16.86	34569.6	33855.9
[L].NEYNQLQLQAAHAQEQ.[I]	NEYNQLQLQAAHAQEQ		P47710	P47710 [107-122]	1884.88	18.03	34531.9	32128.6
[R].TYYANPAVVRPHAQIPQRQY.[L]	TYYANPAVVRPHAQIPQRQY		P07498	P07498 [79-98]	2372.23	16.93	34412.1	33894.1
[S].EESITEYKQKVE.[K]	EESITEYKQKVE		P05814	P05814 [26-37]	1482.73	21.65	34389.4	11713
[Q].ADGSRASVDSGSSEEQGGSSRALVSTLVPLG.[L]	ADGSRASVDSGSSEEQGGSSRALVSTLVPLG		P01833	P01833 [618-648]	2976.45	45.9	34331.2	30111.8
[P].VPQPEIMEVPKAK.[D]	VPQPEIMEVPKAK		P05814	P05814 [93-105]	1465.81	26.79	34259.8	21431.3
[M].QQVPQPIPQ.[T]	QQVPQPIPQ		P05814	P05814 [151-159]	1034.56	15.9	34243	27526.5
[Q].LQAAHAQEQIRRMNENSHVQ.[V]	LQAAHAQEQIRRMNENSHVQ		P47710	P47710 [114-133]	2360.16	12.81	34189.9	34189.9
[L].ESASGEKDLAPPSEPSESFQEHTVDGENQ.[I]	ESASGEKDLAPPSEPSESFQEHTVDGENQ		P24821	P24821 [69-97]	3101.35	18.23	34139.7	27444.6
[A].KLGAVYTEGGFVEGVNK.[K]	KLGAVYTEGGFVEGVNK		P19835	P19835 [22-38]	1767.93	29.93	34111.2	19314
[K].AIPVAQDLNAPSDWDSRGKD.[S]	AIPVAQDLNAPSDWDSRGKD	1xPhospho [S16]	P10451	P10451 [204-223]	2235.01	36.32	33888.2	24006
[E].SLSSSEESITEYK.[Q]	SLSSSEESITEYK		P05814	P05814 [21-33]	1459.68	25.13	33884.9	19307
[D].AAPDEKVLDSGFR.[E]	AAPDEKVLDSGFR		P01833	P01833 [580-592]	1404.71	25.76	33807.3	29287.4
[L].ENLHLPLPLLQ.[P]	ENLHLPLPLLQ		P05814	P05814 [137-147]	1286.75	50.41	33796.1	21678.9
[K].DSHSLTTNIMEILRGDFSSANN.[R]	DSHSLTTNIMEILRGDFSSANN	1xOxidation [M10]	P02671	P02671 [101-122]	2438.13	50.19	33765.9	17890.1
[I].NNPYVPRTYYANPAVVRPHAQ.[I]	NNPYVPRTYYANPAVVRPHAQ		P07498	P07498 [72-92]	2427.23	19.25	33728.4	33728.4
[D].IQYPDATDEDITSHMESEELNGA.[Y]	IQYPDATDEDITSHMESEELNGA	1xPhospho [S/T]; 1xOxidation [M15]	P10451	P10451 [179-201]	2661.05	33.39	33584	15605.4
[A].RETIESLSSSEESITEYKQKVEKVKHEDQQQGEDEHQDKIY.[P]	RETIESLSSSEESITEYKQKVEKVKHEDQQQGEDEHQDKIY		P05814	P05814 [16-56]	4907.35	30.98	33563.5	32252.6
[G].GSSRALVSTLVPLG.[L]	GSSRALVSTLVPLG		P01833	P01833 [635-648]	1356.78	38.99	33542.2	33542.2
[L].ALPPQPLWSVPQPKVLPIPQQVVPYP.[Q]	ALPPQPLWSVPQPKVLPIPQQVVPYP		P05814	P05814 [162-187]	2888.64	42.83	33514.2	33514.2
[P].IPQQVVPYPQRAVP.[V]	IPQQVVPYPQRAVP		P05814	P05814 [179-192]	1591.9	32.65	33068.2	21249.9
[N].ILPLAQPAVVLPVPQPEIMEVP.[K]	ILPLAQPAVVLPVPQPEIMEVP		P05814	P05814 [81-102]	2350.35	44.16	33006.9	14522.2
[S].DVPSGVTEVVV.[K]	DVPSGVTEVVV		P10909	P10909 [397-407]	1100.58	38.43	32987.3	20994.5
[S].DISNPTAHENYEKNNVML.[Q]	DISNPTAHENYEKNNVML	1xOxidation [M17]	P47710	P47710 [166-183]	2104.96	18.82	32892.8	10799.9
[K].LTDLENLHL.[P]	LTDLENLHL		P05814	P05814 [133-141]	1067.57	37.38	32854.1	32854.1
[R].GKDSYETSQLDDQSAETHSHK.[Q]	GKDSYETSQLDDQSAETHSHK	2xPhospho [S4; S8]	P10451	P10451 [221-241]	2522.97	10.98	32810.7	14656.5
[R].ASVDSGSSEEQGGSSRALV.[S]	ASVDSGSSEEQGGSSRALV		P01833	P01833 [623-641]	1822.84	22.32	32715.9	10573.2
[K].DDPDAPLQPVTP.[L]	DDPDAPLQPVTP		P0C0L4	P0C0L5 [1429-1440]	1264.61	23.07	32509.2	22391.7
[K].AIPVAQDLNAPSD.[W]	AIPVAQDLNAPSD		P10451	P10451 [204-216]	1310.66	30.24	32444.3	16531
[L].MPFSPYEPLNF.[H]	MPFSPYEPLNF	1xOxidation [M1]	P10909	P10909 [230-240]	1357.61	49.81	32419.5	12291.2
[K].EIQNAVNGV.[K]	EIQNAVNGV		P10909	P10909 [45-53]	943.484	15.59	32389.4	32389.4
[T].TLTGLRPGTEYGIGVSAVKEDKESNPAT.[I]	TLTGLRPGTEYGIGVSAVKEDKESNPAT		P24821	P24821 [951-978]	2890.48	23.98	32329.8	30380.9
[R].YPERLQNPSESSEPIPLESREEY.[M]	YPERLQNPSESSEPIPLESREEY		P47710	P47710 [23-45]	2749.3	26.13	32311.3	21334
[M].ESSISSSSEEMSLS.[K]	ESSISSSSEEMSLS	1xOxidation [M11]	P47710	P47710 [84-97]	1475.61	13.97	32300.4	16557.6
[S].EPIPLESREEYMNGMN.[R]	EPIPLESREEYMNGMN	1xPhospho [S7]; 1xOxidation [M]	P47710	P47710 [35-50]	2004.81	32.89	32219.4	11841.5
[S].LLENDRQQTHMLDVMQDHFS.[R]	LLENDRQQTHMLDVMQDHFS		P10909	P10909 [162-181]	2457.13	40.78	32184.6	32184.6
[I].LPLAQPAVVLPVPQPEIMEVPK.[A]	LPLAQPAVVLPVPQPEIMEVPK		P05814	P05814 [82-103]	2365.36	42.2	32045.3	24051.3
[P].FVEPIPYGFLPQNILPLAQPAVVLPVPQPEIMEVPK.[A]	FVEPIPYGFLPQNILPLAQPAVVLPVPQPEIMEVPK		P05814	P05814 [68-103]	3980.2	45.17	31964.3	22554.9
[P].IPQQVVPYPQRA.[V]	IPQQVVPYPQRA		P05814	P05814 [179-190]	1395.77	26.7	31874.9	12640.3
[D].SGSSEEKQLYNKYPDAVAT.[W]	SGSSEEKQLYNKYPDAVAT		P10451	P10451 [24-42]	2086.99	25.3	31810.3	28830.6
[R].LNEYNQLQLQA.[A]	LNEYNQLQLQA		P47710	P47710 [106-116]	1333.67	26.68	31737	25154.5
[R].LFAEEKAVAD.[T]	LFAEEKAVAD		P01833	P01833 [604-613]	1092.56	23.96	31707.6	19858.3
[Y].VNKEIQNAVNGVK.[Q]	VNKEIQNAVNGVK		P10909	P10909 [42-54]	1412.79	22.55	31566.5	31566.5
[I].YPFVEPIPYGFLPQNI.[L]	YPFVEPIPYGFLPQNI		P05814	P05814 [66-81]	1893.98	44.39	31504.5	22403.1
[V].VLPVPQPEIMEVPKAKD.[T]	VLPVPQPEIMEVPKAKD	1xOxidation [M10]	P05814	P05814 [90-106]	1906.04	32.02	31476.5	21528.3
[R].RPDIQYPDATDEDITSHMESEELNGAYK.[A]	RPDIQYPDATDEDITSHMESEELNGAYK	1xOxidation [M18]	P10451	P10451 [176-203]	3240.43	30.13	31467	21014.5
[M].YYVPNSYPYYGTNLYQRRPAIA.[I]	YYVPNSYPYYGTNLYQRRPAIA		P07498	P07498 [49-70]	2669.31	41.24	31389.9	19754.1
[G].RGDSVVYGL.[R]	RGDSVVYGL		P10451	P10451 [159-167]	965.505	29.4	31282.8	12644.2
[L].FAEEKAVADTRDQADGSRASVDSGSSEEQGGSSR.[A]	FAEEKAVADTRDQADGSRASVDSGSSEEQGGSSR		P01833	P01833 [605-638]	3486.56	20.85	31239.3	17509.8
[T].DEDITSHMESEELNGAY.[K]	DEDITSHMESEELNGAY	1xOxidation [M8]	P10451	P10451 [186-202]	1955.78	25.99	31219.2	18418.1
[F].DSDPITVTVPVEVSR.[K]	DSDPITVTVPVEVSR		P10909	P10909 [411-425]	1613.84	39.49	31162.2	30772.5
[Q].GEDEHQDKIYPSFQPQ.[P]	GEDEHQDKIYPSFQPQ		P05814	P05814 [47-62]	1917.86	26.49	31077.2	25351.6
[S].ESSEPIPLESREEY.[M]	ESSEPIPLESREEY		P47710	P47710 [32-45]	1664.76	21.34	30879.3	8038.3
[E].TIESLSSSEESITEYKQKVE.[K]	TIESLSSSEESITEYKQKVE		P05814	P05814 [18-37]	2287.12	33.58	30852.1	23669.8
[D].LESASGEKDLAPPSEPSESFQEHTVDGENQ.[I]	LESASGEKDLAPPSEPSESFQEHTVDGENQ		P24821	P24821 [68-97]	3214.43	19.7	30826.7	25648.6
[R].YPERLQNPSESSEPIPLE.[S]	YPERLQNPSESSEPIPLE		P47710	P47710 [23-40]	2085.01	27.22	30601.1	14392.6
[K].LLERLPEVEVPQHL.[-]	LLERLPEVEVPQHL		Q02818	Q02818 [448-461]	1671.94	46.64	30579.2	21665.7
[R].VMPVLKSPTIPFFDPQIPKLTDL.[E]	VMPVLKSPTIPFFDPQIPKLTDL	1xOxidation [M2]	P05814	P05814 [114-136]	2612.44	43.14	30561.7	30561.7
[E].SLSSSEESITE.[Y]	SLSSSEESITE		P05814	P05814 [21-31]	1168.52	23.35	30520.9	24618.8
[R].PKLPLRYPER.[L]	PKLPLRYPER		P47710	P47710 [17-26]	1268.75	15.39	30393.7	30393.7
[A].FLVGSAKPVAQP.[V]	FLVGSAKPVAQP		Q96QR1	Q96QR1 [21-32]	1213.69	27.59	30387.4	27765.9
[A].DSGSSEEKQLYNKYPDAVA.[T]	DSGSSEEKQLYNKYPDAVA		P10451	P10451 [23-41]	2100.97	25.88	30373.3	26849.1
[S].LSSSEESITEYKQKVE.[K]	LSSSEESITEYKQKVE	2xPhospho [S3; S4]	P05814	P05814 [22-37]	2016.85	26.87	30293.2	8840.42
[L].MQQVPQPIPQTLALPPQPLWSVPQP.[K]	MQQVPQPIPQTLALPPQPLWSVPQP	1xOxidation [M1]	P05814	P05814 [150-174]	2806.5	42.81	30264.9	15968.6
[S].KEIPLSPMGEDSAPRDADTLH.[S]	KEIPLSPMGEDSAPRDADTLH		Q13410	Q13410 [493-513]	2279.1	27.22	30257	11632.2
[V].MPVLKSPTIPFFD.[P]	MPVLKSPTIPFFD	1xOxidation [M1]	P05814	P05814 [115-127]	1507.79	41.46	30239.3	15781.3
[Q].LNQLAAYPYAVWY.[Y]	LNQLAAYPYAVWY		P47710	P47710 [139-151]	1571.79	42.62	30226.8	30226.8
[L].MQQVPQPIPQTLALPPQPLWSVPQPK.[V]	MQQVPQPIPQTLALPPQPLWSVPQPK		P05814	P05814 [150-175]	2918.6	42.11	30215.4	26951.5
[I].TGLDPAGPNFEYAEAPS.[R]	TGLDPAGPNFEYAEAPS		P06858	P06858 [180-196]	1735.78	31.66	30133.7	21825.3
[P].VKQADSGSSEEKQLYNKYPDAVA.[T]	VKQADSGSSEEKQLYNKYPDAVA	1xPhospho [S]	P10451	P10451 [19-41]	2607.2	25.74	30122.1	27676.5
[S].LSSSEESITEYKQKVEK.[V]	LSSSEESITEYKQKVEK		P05814	P05814 [22-38]	1985.01	22.75	30102.6	8276.98
[K].VEKVKHEDQQQGEDEHQDKIYPSFQP.[Q]	VEKVKHEDQQQGEDEHQDKIYPSFQP		P05814	P05814 [36-61]	3138.48	16.08	30086	23702.3
[Q].IRRMNENSHVQVPFQQ.[L]	IRRMNENSHVQVPFQQ	1xOxidation [M4]	P47710	P47710 [123-138]	1998.99	23.17	30055.6	30055.6
[D].EKVLDSGFREIENK.[A]	EKVLDSGFREIENK		P01833	P01833 [584-597]	1663.86	25.79	29945.9	16512.1
[L].QNPSESSEPIPLESREEYMNGMN.[R]	QNPSESSEPIPLESREEYMNGMN	2xPhospho [S7; S14]	P47710	P47710 [28-50]	2798.07	42.68	29924.9	17857.2
[L].LLNQELLLNPTH.[Q]	LLNQELLLNPTH		P05814	P05814 [197-208]	1404.78	33.73	29757.9	11487.4
[Y].FVELGTQPATQ.[-]	FVELGTQPATQ		P02652	P02652 [90-100]	1190.61	27.44	29725.5	16192.2
[K].AIQLTYNPDESSKPNMIDAATLK.[S]	AIQLTYNPDESSKPNMIDAATLK		P02679	P02679 [89-111]	2520.27	33.38	29666	22063
[K].VKHEDQQQGEDEHQDKIYPSFQPQPLIYPFVEPIPY.[G]	VKHEDQQQGEDEHQDKIYPSFQPQPLIYPFVEPIPY		P05814	P05814 [39-74]	4339.1	42.13	29650.2	16415.9
[A].VVRPHAQIP.[Q]	VVRPHAQIP		P07498	P07498 [86-94]	1016.6	13.16	29627.7	29627.7
[L].VYYLAGRDLS.[R]	VYYLAGRDLS		P15291	P15291 [39-48]	1156.6	29.01	29428.2	28531.1
[E].RLQNPSESSEPIPLESREEYMNG.[M]	RLQNPSESSEPIPLESREEYMNG	1xPhospho [S16]	P47710	P47710 [26-48]	2742.21	26.46	29360.8	18252.5
[P].LAQPAVVLPVPQPEIMEVP.[K]	LAQPAVVLPVPQPEIMEVP	1xOxidation [M16]	P05814	P05814 [84-102]	2043.12	41.84	29355.8	11505.7
[F].DSDPITVTVPVE.[V]	DSDPITVTVPVE		P10909	P10909 [411-422]	1271.64	40.47	29239.1	19934.7
[N].SHVQVPF.[Q]	SHVQVPF		P47710	P47710 [130-136]	813.425	20.98	29155	29155
[D].DPDAPLQPVTP.[L]	DPDAPLQPVTP		P0C0L4	P0C0L5 [1430-1440]	1149.58	30.5	29094.7	17693
[P].AVVLPVPQPEIMEVP.[K]	AVVLPVPQPEIMEVP		P05814	P05814 [88-102]	1617.89	42.5	29022.3	19324.3
[N].LTKDDLDEEEDTHL.[-]	LTKDDLDEEEDTHL		O00592	O00592 [545-558]	1672.75	25.15	28812.5	14203.4
[P].NSYPYYGTNL.[Y]	NSYPYYGTNL		P07498	P07498 [53-62]	1191.53	33.97	28805.7	13326.7
[L].QPLMQQVPQPIPQ.[T]	QPLMQQVPQPIPQ		P05814	P05814 [147-159]	1503.8	36.8	28767.5	14943
[D].PRLFAEEKAVADT.[R]	PRLFAEEKAVADT		P01833	P01833 [602-614]	1446.76	17.52	28729.1	19013.9
[V].LPVPQPEIMEVPKAKD.[T]	LPVPQPEIMEVPKAKD	1xOxidation [M9]	P05814	P05814 [91-106]	1806.97	29	28652.7	16285.4
[E].NSHVQVPFQ.[Q]	NSHVQVPFQ		P47710	P47710 [129-137]	1055.53	25.98	28619.4	22467.7
[L].HLPLPLLQ.[P]	HLPLPLLQ		P05814	P05814 [140-147]	930.577	39.82	28557.9	20718.2
[I].LREKQTDEIKDT.[R]	LREKQTDEIKDT		P47710	P47710 [56-67]	1475.77	12.48	28548.8	19426
[E].DEHQDKIYPSFQPQPL.[I]	DEHQDKIYPSFQPQPL		P05814	P05814 [49-64]	1941.93	30.85	28525.5	16979.8
[I].SNPTAHENYEK.[N]	SNPTAHENYEK		P47710	P47710 [168-178]	1289.58	20.28	28518.9	27397.9
[K].GRVMPVLKSPTIPFFD.[P]	GRVMPVLKSPTIPFFD		P05814	P05814 [112-127]	1803.98	41.35	28304.4	26450.9
[Q].TLALPPQPLWSVPQPK.[V]	TLALPPQPLWSVPQPK		P05814	P05814 [160-175]	1772.01	40.55	28175.7	21083.7
[R].PNLHPSFIAIPPK.[K]	PNLHPSFIAIPPK		P07498	P07498 [111-123]	1430.82	27.12	28060.2	28060.2
[A].GRDLSRLPQLVGVSTPLQGGSNSAAAIGQSSGE.[L]	GRDLSRLPQLVGVSTPLQGGSNSAAAIGQSSGE		P15291	P15291 [44-76]	3209.65	38.55	28053.8	23655.5
[R].IRLDIQGTGQL.[L]	IRLDIQGTGQL		P01833	P01833 [191-201]	1213.69	29.86	27998.4	19616.2
[S].VDSGSSEEQGGSSRALVSTLV.[P]	VDSGSSEEQGGSSRALVSTLV		P01833	P01833 [625-645]	2065	37.15	27887.2	7811.35
[L].ERLPEVEVPQHL.[-]	ERLPEVEVPQHL		Q02818	Q02818 [450-461]	1445.77	27.89	27843.4	15074.5
[N].PTHQIYPVTQPL.[A]	PTHQIYPVTQPL		P05814	P05814 [206-217]	1393.75	32.11	27730.2	10613.3
[I].ESLSSSEESITEYKQKVE.[K]	ESLSSSEESITEYKQKVE		P05814	P05814 [20-37]	2072.99	27.37	27726	22083
[L].ESREEYMNGMNR.[Q]	ESREEYMNGMNR	1xPhospho [S2]	P47710	P47710 [40-51]	1595.6	21.13	27671.5	19416.2
[S].DISNPTAHENYEKNNVML.[Q]	DISNPTAHENYEKNNVML		P47710	P47710 [166-183]	2088.97	29.15	27658.2	13397.8
[P].SFQPQPLIYP.[F]	SFQPQPLIYP		P05814	P05814 [58-67]	1189.63	46.82	27653	9533.83
[S].GEGDFLAEGGGV.[R]	GEGDFLAEGGGV		P02671	P02671 [23-34]	1107.5	36.25	27613.3	17498.7
[H].EDQQQGEDEHQDKIYPSFQ.[P]	EDQQQGEDEHQDKIYPSFQ		P05814	P05814 [42-60]	2321	25.7	27563.1	27563.1
[Y].YPQIMQYVPFPPFSD.[I]	YPQIMQYVPFPPFSD		P47710	P47710 [152-166]	1828.86	44.14	27464.2	27464.2
[L].LNQELLLNPTHQIY.[P]	LNQELLLNPTHQIY		P05814	P05814 [198-211]	1695.91	38.38	27418.9	23189.8
[P].QPEIMEVPKAKDTV.[Y]	QPEIMEVPKAKDTV	1xOxidation [M5]	P05814	P05814 [95-108]	1600.83	22.8	27400.6	27400.6
[R].YPERLQNPSESSEPIPLESREEYMNGMN.[R]	YPERLQNPSESSEPIPLESREEYMNGMN		P47710	P47710 [23-50]	3296.48	37.55	27338	18085.4
[D].ISNPTAHENYEKNNVMLQW.[-]	ISNPTAHENYEKNNVMLQW		P47710	P47710 [167-185]	2288.08	31.78	27247.6	16199.6
[A].IPVKQADSGSSEEKQLYNKYPDA.[V]	IPVKQADSGSSEEKQLYNKYPDA	1xPhospho [S11]	P10451	P10451 [17-39]	2647.23	25.1	27107.3	25488.1
[I].QDPRLFAEEKAVA.[D]	QDPRLFAEEKAVA		P01833	P01833 [600-612]	1473.77	27.02	27089.5	13750.3
[P].KLPLRYPERLQNPSESSEPIPLESREEYMNGMN.[R]	KLPLRYPERLQNPSESSEPIPLESREEYMNGMN	2xPhospho [S17; S24]	P47710	P47710 [18-50]	4063.83	44.42	26970.4	25058.6
[V].VLPVPQPEIMEVPKAK.[D]	VLPVPQPEIMEVPKAK		P05814	P05814 [90-105]	1775.01	32.78	26819.5	25595.7
[L].FAEEKAVADTRDQADGSRASVDSGSSEEQG.[G]	FAEEKAVADTRDQADGSRASVDSGSSEEQG		P01833	P01833 [605-634]	3099.37	21.56	26760.4	14088.5
[K].LTDLENLHLPLPLLQPLMQQVPQPIPQTLALPPQP.[L]	LTDLENLHLPLPLLQPLMQQVPQPIPQTLALPPQP		P05814	P05814 [133-167]	3903.18	44.97	26699.6	17074
[P].VQALLLNQEL.[L]	VQALLLNQEL		P05814	P05814 [193-202]	1140.66	48.06	26663.4	17996.4
[P].DIQYPDATDEDITSHMESEELNGAYK.[A]	DIQYPDATDEDITSHMESEELNGAYK		P10451	P10451 [178-203]	2971.28	41.61	26649.1	14309.8
[L].LNPTHQIYPVTQPLAPVHNPI.[S]	LNPTHQIYPVTQPLAPVHNPI		P05814	P05814 [204-224]	2349.27	35.36	26633	17030.2
[R].IRLDIQGTGQLLFSVVINQLR.[L]	IRLDIQGTGQLLFSVVINQLR		P01833	P01833 [191-211]	2383.38	52.5	26501.3	3859.71
[P].TGLSAPLSFIP.[R]	TGLSAPLSFIP		Q6WN34	Q6WN34 [217-227]	1102.61	51	26474	14227.5
[A].QPAVVLPVPQPEIME.[V]	QPAVVLPVPQPEIME	1xOxidation [M14]	P05814	P05814 [86-100]	1662.88	47.5	26464.2	12962.2
[E].DQQQGEDEHQDKIYPSF.[Q]	DQQQGEDEHQDKIYPSF		P05814	P05814 [43-59]	2063.89	28.83	26463.6	9039.95
[L].FAEEKAVADTRDQADGSRASVDSGSSEEQGGSSRALVS.[T]	FAEEKAVADTRDQADGSRASVDSGSSEEQGGSSRALVS		P01833	P01833 [605-642]	3856.78	15.5	26452.7	21138.6
[P].AVVLPVPQPEIM.[E]	AVVLPVPQPEIM	1xOxidation [M12]	P05814	P05814 [88-99]	1308.72	46.46	26442.9	7166.44
[S].SEESITEYKQKV.[E]	SEESITEYKQKV		P05814	P05814 [25-36]	1440.72	22.2	26403.3	20689.2
[G].DHAEVDVPKSQQATT.[K]	DHAEVDVPKSQQATT		P24821	P24821 [934-948]	1625.78	10.64	26382.6	25064
[S].NQGSKYVNKEIQNAVNGVKQ.[I]	NQGSKYVNKEIQNAVNGVKQ		P10909	P10909 [36-55]	2218.16	17.63	26118.2	18785
[K].YVNKEIQNAVNGVKQIK.[T]	YVNKEIQNAVNGVKQIK		P10909	P10909 [41-57]	1945.09	22.89	26065.9	26065.9
[Y].EKVSAGNGGSSLSY.[T]	EKVSAGNGGSSLSY		P15941	P15941 [1230-1243]	1355.64	21.77	26010.2	13862.6
[A].SVDSGSSEEQGGSSRALVS.[T]	SVDSGSSEEQGGSSRALVS		P01833	P01833 [624-642]	1838.84	19.91	25836.1	9890.55
[Y].YGTNLYQRRPAIAINNPYVP.[R]	YGTNLYQRRPAIAINNPYVP		P07498	P07498 [58-77]	2320.22	34.16	25817.1	25817.1
[D].VSLAKADAAPDEKVLDSGF.[R]	VSLAKADAAPDEKVLDSGF		P01833	P01833 [573-591]	1932.99	29.07	25785.5	22869.2
[P].LLQPLMQQVP.[Q]	LLQPLMQQVP		P05814	P05814 [145-154]	1166.66	39.17	25739.8	10958.5
[L].LNPTHQIYPVTQP.[L]	LNPTHQIYPVTQP		P05814	P05814 [204-216]	1507.79	27.91	25690.8	7968.61
[R].LQNPSESSEPIPLES.[R]	LQNPSESSEPIPLES		P47710	P47710 [27-41]	1626.79	32.44	25534.1	13016
[P].EIMEVPKAKDT.[V]	EIMEVPKAKDT	1xOxidation [M3]	P05814	P05814 [97-107]	1276.65	21.74	25483.2	25483.2
[Y].FVELGTQPA.[T]	FVELGTQPA		P02652	P02652 [90-98]	961.499	28.74	25451.8	18161.5
[G].EGDFLAEGGGV.[R]	EGDFLAEGGGV		P02671	P02671 [24-34]	1050.47	35.21	25400.7	18741.1
[Y].LPNSHPPTVVRRPNLHPSF.[I]	LPNSHPPTVVRRPNLHPSF		P07498	P07498 [99-117]	2165.17	26.3	25369.7	25369.7
[P].FPPFSDISNPTAHENYEK.[N]	FPPFSDISNPTAHENYEK		P47710	P47710 [161-178]	2092.96	38.67	25336.2	22481
[P].LLQPLMQQVPQPIPQTLALPPQPLWSVPQPK.[V]	LLQPLMQQVPQPIPQTLALPPQPLWSVPQPK	1xOxidation [M6]	P05814	P05814 [145-175]	3498.95	50.86	25303.3	24229.9
[H].LPLPLLQPLM.[Q]	LPLPLLQPLM	1xOxidation [M10]	P05814	P05814 [141-150]	1150.69	43.42	25243.8	16791.4
[E].DQQQGEDEHQDKIYPSFQPQPL.[I]	DQQQGEDEHQDKIYPSFQPQPL		P05814	P05814 [43-64]	2627.2	37.74	25189.1	14424.1
[Y].NQLQLQAAHAQEQI.[R]	NQLQLQAAHAQEQI		P47710	P47710 [110-123]	1591.82	28.07	25153.5	18077.4
[V].KHEDQQQGEDEHQDKIYPSFQ.[P]	KHEDQQQGEDEHQDKIYPSFQ		P05814	P05814 [40-60]	2586.15	22.16	25027.1	18017.3
[I].YPFVEPIPYGFLPQNILPLAQPAVVLPVPQPEIMEVPKA.[K]	YPFVEPIPYGFLPQNILPLAQPAVVLPVPQPEIMEVPKA		P05814	P05814 [66-104]	4311.35	44.97	24823.3	16753.4
[G].EDEHQDKIYPSFQPQPLI.[Y]	EDEHQDKIYPSFQPQPLI		P05814	P05814 [48-65]	2184.06	38.44	24806.3	22191.9
[K].DDPDAPLQPVTPLQLFEGR.[R]	DDPDAPLQPVTPLQLFEGR		P0C0L4	P0C0L5 [1429-1447]	2108.07	50.8	24719.7	13011.6
[K].YVNKEIQNAVNGV.[K]	YVNKEIQNAVNGV		P10909	P10909 [41-53]	1447.75	29.85	24607.8	21806.9
[Q].EQIRRMNENSHVQVPFQ.[Q]	EQIRRMNENSHVQVPFQ		P47710	P47710 [121-137]	2112.04	17.35	24464	24464
[T].DEDITSHMESEELNGAYK.[A]	DEDITSHMESEELNGAYK	1xOxidation [M8]	P10451	P10451 [186-203]	2083.88	23.41	24416	10681.5
[L].PLAQPAVVLPVPQP.[E]	PLAQPAVVLPVPQP		P05814	P05814 [83-96]	1425.85	40.44	24300	13702.4
[K].VLDSGFREIE.[N]	VLDSGFREIE		P01833	P01833 [586-595]	1164.59	30.23	24269.7	18877.3
[V].LPVPQPEIM.[E]	LPVPQPEIM	1xOxidation [M9]	P05814	P05814 [91-99]	1039.55	31.98	24245.6	22422.2
[F].DPQIPKLTDLENLHLPLPL.[L]	DPQIPKLTDLENLHLPLPL		P05814	P05814 [127-145]	2166.22	43.9	24153.9	18262.3
[L].KSPTIPFFD.[P]	KSPTIPFFD		P05814	P05814 [119-127]	1051.55	47.33	24139.7	8435.84
[F].LSALEEYTKKLNTQ.[-]	LSALEEYTKKLNTQ		P02647	P02647 [254-267]	1637.87	31.85	24102.3	17647.4
[L].SPDDADFVDVLHTFT.[R]	SPDDADFVDVLHTFT		P06858	P06858 [199-213]	1678.76	50.61	24082.2	22848
[L].HLPLPLLQPLM.[Q]	HLPLPLLQPLM	1xOxidation [M11]	P05814	P05814 [140-150]	1287.75	41.99	23994.5	18216.4
[R].TPVLSAEASTGETPNLGE.[V]	TPVLSAEASTGETPNLGE		P24821	P24821 [1153-1170]	1772.85	25.25	23971.1	23971.1
[Q].VPQPIPQTLALPPQ.[P]	VPQPIPQTLALPPQ		P05814	P05814 [153-166]	1498.86	36.42	23841	18397.5
[Q].DLNAPSDWDSRGKDS.[Y]	DLNAPSDWDSRGKDS		P10451	P10451 [210-224]	1662.74	23.65	23786.1	15914.2
[Y].GFLPQNILPLAQPAVVLPVPQPEIMEVPKAKDTVYTKG.[R]	GFLPQNILPLAQPAVVLPVPQPEIMEVPKAKDTVYTKG	1xOxidation [M25]	P05814	P05814 [75-112]	4114.27	42.21	23731	19387.9
[K].IIEGEPNL.[K]	IIEGEPNL		P01833	P01833 [457-464]	884.472	28.94	23668	22744.6
[R].LQNPSESSEPIPLESREEYMNG.[M]	LQNPSESSEPIPLESREEYMNG	1xPhospho [S15]; 1xOxidation [M20]	P47710	P47710 [27-48]	2602.1	31.8	23663.1	20518
[R].PDIQYPDATDEDITSHMESEELNGA.[Y]	PDIQYPDATDEDITSHMESEELNGA		P10451	P10451 [177-201]	2777.17	43.57	23472.2	8565.5
[P].QRAVPVQALLLNQE.[L]	QRAVPVQALLLNQE		P05814	P05814 [188-201]	1578.9	42.42	23466	14724.9
[S].VPQPKVLPIPQQVVPYPQR.[A]	VPQPKVLPIPQQVVPYPQR		P05814	P05814 [171-189]	2183.27	43.08	23455.6	23455.6
[P].ERLQNPSESSEPIPL.[E]	ERLQNPSESSEPIPL		P47710	P47710 [25-39]	1695.85	26.1	23307.4	23307.4
[P].LLQPLMQQ.[V]	LLQPLMQQ		P05814	P05814 [145-152]	970.539	34.84	23293.6	18333.3
[D].IQYPDATDEDITSHMESEELNGAYK.[A]	IQYPDATDEDITSHMESEELNGAYK	1xOxidation [M15]	P10451	P10451 [179-203]	2872.25	30.58	23249.9	15513.1
[L].ALPPQPLWSVPQPKVLPIPQQVVPYPQ.[R]	ALPPQPLWSVPQPKVLPIPQQVVPYPQ		P05814	P05814 [162-188]	3016.7	42.46	23192.7	17697.5
[R].EGVQKEDIPPAD.[L]	EGVQKEDIPPAD		P01024	P01024 [955-966]	1297.63	11.93	23081	21407.6
[R].DVSLAKADAAPDEKVLDSGFREIE.[N]	DVSLAKADAAPDEKVLDSGFREIE		P01833	P01833 [572-595]	2575.29	35.72	23028.8	13617
[S].EETKENEGFTVTAEGK.[G]	EETKENEGFTVTAEGK		P01024	P01024 [1322-1337]	1768.82	13.42	22927.6	16434.1
[K].NADLQVLKPEPEL.[V]	NADLQVLKPEPEL		P01833	P01833 [232-244]	1465.79	40.18	22861.7	11454.1
[D].ATDEDITSHMESEELNGAY.[K]	ATDEDITSHMESEELNGAY	1xOxidation [M10]	P10451	P10451 [184-202]	2127.87	25.88	22845	12723.7
[Q].LQLQAAHAQEQI.[R]	LQLQAAHAQEQI		P47710	P47710 [112-123]	1349.72	26.33	22831.2	17736.3
[L].ESREEYMNGMNRQRNIL.[R]	ESREEYMNGMNRQRNIL		P47710	P47710 [40-56]	2140	25.91	22777.6	22184.3
[D].SGEGDFLAEGGGV.[R]	SGEGDFLAEGGGV		P02671	P02671 [22-34]	1194.53	36.15	22755.1	13849.8
[Y].FVELGTQPAT.[Q]	FVELGTQPAT		P02652	P02652 [90-99]	1062.55	28.39	22709.2	16083.2
[S].RALVSTLVP.[L]	RALVSTLVP		P01833	P01833 [638-646]	955.593	37.21	22592.6	22592.6
[R].VMPVLKSPTIPFFDPQIPKLTD.[L]	VMPVLKSPTIPFFDPQIPKLTD	1xOxidation [M2]	P05814	P05814 [114-135]	2499.36	41.77	22589.3	13408.4
[S].VPQPKVLPIPQQV.[V]	VPQPKVLPIPQQV		P05814	P05814 [171-183]	1442.87	31.68	22498.2	15072.5
[L].SSSEESITEYKQKV.[E]	SSSEESITEYKQKV		P05814	P05814 [23-36]	1614.79	22.66	22495.9	14312.3
[G].SSRALVSTLVPLG.[L]	SSRALVSTLVPLG		P01833	P01833 [636-648]	1299.76	38.11	22418.5	15156.9
[M].DPSKPSSNVAGVVII.[V]	DPSKPSSNVAGVVII		P22897	P22897 [1380-1394]	1482.82	41.42	22294.9	9919.14
[L].RYPERLQNPSESSEPIPLESREEYMNGMN.[R]	RYPERLQNPSESSEPIPLESREEYMNGMN	1xOxidation [M25]	P47710	P47710 [22-50]	3468.58	30.74	22255	12171.9
[R].PDIQYPDATDEDITSHMESEELNGAY.[K]	PDIQYPDATDEDITSHMESEELNGAY	1xOxidation [M17]	P10451	P10451 [177-202]	2956.23	30.46	22250.9	11696.8
[Q].RKLSVALAFVGGSKVVILDEPTA.[G]	RKLSVALAFVGGSKVVILDEPTA	1xAcetyl [N-Term]; 2xPhospho [S4; S13]	O95477	O95477 [1039-1061]	2572.32	27.48	22220.5	14023.1
[A].INNPYVPRTYYANPAVVRPH.[A]	INNPYVPRTYYANPAVVRPH		P07498	P07498 [71-90]	2341.22	30.86	22204.4	22204.4
[P].LIYPFVEPIPYGFLPQNILPLAQPA.[V]	LIYPFVEPIPYGFLPQNILPLAQPA		P05814	P05814 [64-88]	2810.55	45.06	22178.1	9261.34
[A].DTRDQADGSRASVDSGSSEEQGGSSRALV.[S]	DTRDQADGSRASVDSGSSEEQGGSSRALV		P01833	P01833 [613-641]	2924.32	21.58	22148.2	7503.65
[S].LSSSEESITEY.[K]	LSSSEESITEY		P05814	P05814 [22-32]	1244.55	26.68	21779.8	9526.15
[S].SSEESITEYKQKV.[E]	SSEESITEYKQKV		P05814	P05814 [24-36]	1527.75	22.49	21695	11845.2
[P].FPPFSDISNPTAHENYEKNNVM.[L]	FPPFSDISNPTAHENYEKNNVM		P47710	P47710 [161-182]	2551.16	37.1	21673.8	19228.4
[E].LLLNPTHQIYPVT.[Q]	LLLNPTHQIYPVT		P05814	P05814 [202-214]	1508.85	43.35	21633.1	12011.9
[L].NQLAAYPYAV.[W]	NQLAAYPYAV		P47710	P47710 [140-149]	1109.56	36.68	21584.2	20565.7
[D].GSRASVDSGSSEEQGGSSRALVSTL.[V]	GSRASVDSGSSEEQGGSSRALVSTL		P01833	P01833 [620-644]	2424.16	27.02	21572.6	13185.9
[D].IQYPDATDEDIT.[S]	IQYPDATDEDIT		P10451	P10451 [179-190]	1380.62	28.86	21553.6	9922.26
[G].DQTVSDNELQEMSNQGSKYVN.[K]	DQTVSDNELQEMSNQGSKYVN		P10909	P10909 [23-43]	2386.05	34.84	21535.5	16262.9
[L].SSSEESITEYKQ.[K]	SSSEESITEYKQ		P05814	P05814 [23-34]	1387.62	12.32	21478	14565.3
[L].IYPFVEPIPYGFLPQNILPLAQPAVVLPVPQPE.[I]	IYPFVEPIPYGFLPQNILPLAQPAVVLPVPQPE		P05814	P05814 [65-97]	3656.02	44.54	21403.2	19669.5
[Q].PAVVLPVPQPEIMEVPKAKDTVYT.[K]	PAVVLPVPQPEIMEVPKAKDTVYT	1xOxidation [M13]	P05814	P05814 [87-110]	2637.42	38.33	21309.2	8365.61
[A].KLGAVYTEGGFVEGVNKK.[L]	KLGAVYTEGGFVEGVNKK		P19835	P19835 [22-39]	1896.02	18.85	21280	15270
[R].RPAIAINNPYVPRTYYANP.[A]	RPAIAINNPYVPRTYYANP		P07498	P07498 [66-84]	2190.15	38.37	21150.7	21150.7
[I].ESLSSSEESITEYK.[Q]	ESLSSSEESITEYK		P05814	P05814 [20-33]	1588.72	26.39	21113.7	11783.9
[S].LSSSEESITEYKQKVEK.[V]	LSSSEESITEYKQKVEK	1xPhospho [S4]	P05814	P05814 [22-38]	2064.97	15.55	21051.3	17645.2
[E].RLQNPSESSEPIPLESREE.[Y]	RLQNPSESSEPIPLESREE	1xPhospho [S16]	P47710	P47710 [26-44]	2277.04	27.28	20995.8	7614.31
[K].HEDQQQGEDEHQDKIYPSFQP.[Q]	HEDQQQGEDEHQDKIYPSFQP		P05814	P05814 [41-61]	2555.11	26.65	20907.2	14929.2
[M].NENSHVQVPFQQLNQL.[A]	NENSHVQVPFQQLNQL		P47710	P47710 [127-142]	1894.94	38.77	20841.5	16291.9
[E].TIESLSSSEESITEYKQKVEK.[V]	TIESLSSSEESITEYKQKVEK		P05814	P05814 [18-38]	2415.21	30.54	20832	10211.6
[N].EYNQLQL.[Q]	EYNQLQL		P47710	P47710 [108-114]	907.452	33.43	20800.9	14833.3
[P].DIQYPDATDEDITSHMESEELNG.[A]	DIQYPDATDEDITSHMESEELNG		P10451	P10451 [178-200]	2609.08	42.15	20753.5	10358.3
[P].DATDEDITSHMESEELNGAY.[K]	DATDEDITSHMESEELNGAY		P10451	P10451 [183-202]	2226.9	29.96	20753.1	7579.86
[I].LPLAQPAVVL.[P]	LPLAQPAVVL		P05814	P05814 [82-91]	1020.65	40.26	20735.9	16858.3
[E].RLQNPSESSEPIPLESREEY.[M]	RLQNPSESSEPIPLESREEY	2xPhospho [S9; S16]	P47710	P47710 [26-45]	2520.07	33.97	20634.2	8848.08
[V].PQPEIMEVPKAKDTVYTK.[G]	PQPEIMEVPKAKDTVYTK	1xOxidation [M6]	P05814	P05814 [94-111]	2090.08	37.4	20594.8	20241.8
[A].SVDSGSSEEQGGSSRALVSTLVPL.[G]	SVDSGSSEEQGGSSRALVSTLVPL		P01833	P01833 [624-647]	2362.17	48.42	20502.1	7603.98
[K].GAQTQTEEEMTRYVQELQKHQETAEKT.[K]	GAQTQTEEEMTRYVQELQKHQETAEKT		Q12841	Q12841 [274-300]	3193.51	31.91	20489.8	14647.3
[Q].PEIMEVPKAKDTVY.[T]	PEIMEVPKAKDTVY		P05814	P05814 [96-109]	1619.83	21.47	20448.7	19981.3
[N].LYQRRPAIAINNPYVPRT.[Y]	LYQRRPAIAINNPYVPRT		P07498	P07498 [62-79]	2142.19	22.2	20415.5	20415.5
[V].PQPEIMEVPKAKDTVY.[T]	PQPEIMEVPKAKDTVY		P05814	P05814 [94-109]	1844.95	46.72	20147.4	20147.4
[K].DAVTTTVTGAK.[D]	DAVTTTVTGAK		Q99541	Q99541 [117-127]	1063.56	21.19	20104.5	12895.1
[L].IPTQPSQGAP.[-]	IPTQPSQGAP		Q13410	Q13410 [517-526]	995.516	20.18	20082.8	13620.5
[R].VMPVLKSPTIPFFDPQIPKLTDLENL.[H]	VMPVLKSPTIPFFDPQIPKLTDLENL		P05814	P05814 [114-139]	2952.62	43.89	20049.2	20049.2
[Q].DPRLFAEEKAVADTRDQ.[A]	DPRLFAEEKAVADTRDQ		P01833	P01833 [601-617]	1960.97	26.4	20021.1	9698.17
[K].AVADTRDQADGS.[R]	AVADTRDQADGS		P01833	P01833 [610-621]	1205.54	1.61	20021	9226.02
[M].YYVPNSYPYYGTN.[L]	YYVPNSYPYYGTN		P07498	P07498 [49-61]	1600.7	35.2	19960.8	14732.4
[M].ESSISSSSEEMS.[L]	ESSISSSSEEMS		P47710	P47710 [84-95]	1259.49	11.48	19932	17707
[R].RPDIQYPDATDEDITSHMESEE.[L]	RPDIQYPDATDEDITSHMESEE	1xOxidation [M18]	P10451	P10451 [176-197]	2594.08	25.99	19790.7	9700.19
[N].LLAPQNAVSSEETNDFKQETLPSK.[S]	LLAPQNAVSSEETNDFKQETLPSK	2xPhospho [S9; S10]	P10451	P10451 [54-77]	2806.26	28.48	19717.9	19717.9
[T].IPFFDPQIPKLTDLENL.[H]	IPFFDPQIPKLTDLENL		P05814	P05814 [123-139]	2000.07	43.78	19618.4	12336.2
[R].VMPVLKSPTIPFFDPQ.[I]	VMPVLKSPTIPFFDPQ	1xOxidation [M2]	P05814	P05814 [114-129]	1831.97	49.63	19601.2	11162.5
[E].RLQNPSESSEPIPLESRE.[E]	RLQNPSESSEPIPLESRE		P47710	P47710 [26-43]	2068.03	25.86	19525.3	9379.14
[A].VADTRDQADGSRASVDSGSSEEQGGSSRAL.[V]	VADTRDQADGSRASVDSGSSEEQGGSSRAL		P01833	P01833 [611-640]	2995.36	11.47	19426.6	10209.3
[L].VGPFAPGITEKAPEEK.[K]	VGPFAPGITEKAPEEK		O60664	O60664 [418-433]	1669.88	19.17	19248.5	9946.07
[P].LIYPFVEPIPYGFLPQNILPLAQPAVVLPVPQPEIMEVPKA.[K]	LIYPFVEPIPYGFLPQNILPLAQPAVVLPVPQPEIMEVPKA		P05814	P05814 [64-104]	4537.52	45.2	19186.5	12901.1
[H].AQIPQRQYLPNSHPPTVV.[R]	AQIPQRQYLPNSHPPTVV		P07498	P07498 [91-108]	2045.09	21.49	19167.3	13661.4
[L].DPDTAHPHLF.[L]	DPDTAHPHLF		Q13410	Q13410 [308-317]	1149.53	18.82	19133.3	17986
[S].VDSGSSEEQGGSSRALVST.[L]	VDSGSSEEQGGSSRALVST		P01833	P01833 [625-643]	1852.85	20.71	19098.3	10662
[R].AVPVQALLLNQELLLNPTHQIYP.[V]	AVPVQALLLNQELLLNPTHQIYP		P05814	P05814 [190-212]	2584.45	43.15	19042.9	11936.9
[A].KADAAPDEKVLDSGFREIENK.[A]	KADAAPDEKVLDSGFREIENK		P01833	P01833 [577-597]	2332.18	31.87	18941.7	18190.4
[Q].RAVPVQALL.[L]	RAVPVQALL		P05814	P05814 [189-197]	966.609	28.65	18913.5	14827.7
[I].SSEGYVSSKYAG.[R]	SSEGYVSSKYAG		P01833	P01833 [69-80]	1234.56	12.59	18912.7	17295
[M].SNQGSKYVNKEIQNAVNGV.[K]	SNQGSKYVNKEIQNAVNGV		P10909	P10909 [35-53]	2049.04	22.02	18897.8	12719.2
[K].LTDLENLHLPLPLLQPL.[M]	LTDLENLHLPLPLLQPL		P05814	P05814 [133-149]	1939.13	44.58	18875.8	10270.7
[V].LKSPTIPFFDPQIPKLTD.[L]	LKSPTIPFFDPQIPKLTD		P05814	P05814 [118-135]	2057.13	41.74	18868.4	13729.9
[S].ESSEPIPLESREEYMNGMN.[R]	ESSEPIPLESREEYMNGMN	1xOxidation [M15]	P47710	P47710 [32-50]	2227.95	28.9	18832.7	8119.87
[K].DDPDAPLQP.[V]	DDPDAPLQP		P0C0L4	P0C0L5 [1429-1437]	967.437	24.52	18828.4	16515.5
[P].LTEEELEKEAKKVEGFD.[L]	LTEEELEKEAKKVEGFD		Q99541	Q99541 [193-209]	1994	32.93	18683	18191.6
[T].APYVPMYYVPNS.[Y]	APYVPMYYVPNS	1xOxidation [M6]	P07498	P07498 [43-54]	1416.65	28.03	18680.2	12616.7
[S].KEIPLSPMGEDSAPRDADTLHSKL.[I]	KEIPLSPMGEDSAPRDADTLHSKL		Q13410	Q13410 [493-516]	2607.31	22.95	18571.7	12715
[K].TTFDVYTESWAQDPSQENK.[K]	TTFDVYTESWAQDPSQENK		P19835	P19835 [382-400]	2245.99	31.89	18563.8	10191
[E].IPLSPMGEDSAPRDADTLH.[S]	IPLSPMGEDSAPRDADTLH	1xOxidation [M6]	Q13410	Q13410 [495-513]	2037.95	25.07	18537.7	12203.4
[A].DAAPDEKVLDSGFREIENKAIQDP.[R]	DAAPDEKVLDSGFREIENKAIQDP		P01833	P01833 [579-602]	2657.31	47.01	18532.7	11777.6
[V].SPAVLVHRDGREQEAEQMPEY.[R]	SPAVLVHRDGREQEAEQMPEY	1xOxidation [M18]	Q13410	Q13410 [71-91]	2457.15	22.28	18509.7	9161.2
[S].SEPIPLESREEYMNGMN.[R]	SEPIPLESREEYMNGMN	1xPhospho [S8]; 1xOxidation [M16]	P47710	P47710 [34-50]	2091.84	33.55	18369.3	9465.67
[L].PVPQPEIMEVP.[K]	PVPQPEIMEVP		P05814	P05814 [92-102]	1235.63	44.6	18349.1	14797.2
[E].QIRRMNENSHVQVPFQQLNQ.[L]	QIRRMNENSHVQVPFQQLNQ		P47710	P47710 [122-141]	2466.24	20.77	18292	16483.7
[Q].DLNAPSDWDSRGK.[D]	DLNAPSDWDSRGK		P10451	P10451 [210-222]	1460.68	23.61	18244.5	12468.4
[L].ESREEYMNGMNRQ.[R]	ESREEYMNGMNRQ		P47710	P47710 [40-52]	1643.69	11.45	18151.5	11911.3
[M].QQVPQPIPQTLALPPQPLWSVPQ.[P]	QQVPQPIPQTLALPPQPLWSVPQ		P05814	P05814 [151-173]	2562.41	41.83	18126.8	12750.2
[E].DITSHMESEELNGAY.[K]	DITSHMESEELNGAY	1xPhospho [S/T]; 1xOxidation [M6]	P10451	P10451 [188-202]	1791.68	28.38	18109.1	10123.9
[K].SPTIPFFDPQI.[P]	SPTIPFFDPQI		P05814	P05814 [120-130]	1261.65	43.13	18047.5	18047.5
[T].TVASHTSDSDVPSGVTEVVVK.[L]	TVASHTSDSDVPSGVTEVVVK		P10909	P10909 [388-408]	2114.06	27.08	18005.7	16864.8
[L].PLAQPAVVLPVPQPEIMEVP.[K]	PLAQPAVVLPVPQPEIMEVP	1xOxidation [M17]	P05814	P05814 [83-102]	2140.17	41.85	17989.7	8961.43
[Q].ADSGSSEEKQLYNKYPDAVAT.[W]	ADSGSSEEKQLYNKYPDAVAT	1xPhospho [S]	P10451	P10451 [22-42]	2353.02	27.62	17928.7	17928.7
[D].DPDAPLQPVTPLQLFEGRRN.[R]	DPDAPLQPVTPLQLFEGRRN		P0C0L4	P0C0L5 [1430-1449]	2263.18	41.51	17737.7	12152.2
[W].SVPQPKVLPIPQQVVP.[Y]	SVPQPKVLPIPQQVVP		P05814	P05814 [170-185]	1726.03	47.02	17613.7	17613.7
[R].AVPVQALLLNQ.[E]	AVPVQALLLNQ		P05814	P05814 [190-200]	1165.69	47.98	17515	10222.1
[N].DESNEHSDVIDSQELS.[K]	DESNEHSDVIDSQELS		P10451	P10451 [252-267]	1803.75	24.85	17476	11170.3
[E].SLSSSEESITEYKQKVEK.[V]	SLSSSEESITEYKQKVEK	1xPhospho [S5]	P05814	P05814 [21-38]	2152.01	24.24	17440.5	7197.68
[A].LLLNQELLLNP.[T]	LLLNQELLLNP		P05814	P05814 [196-206]	1279.76	50.39	17419.7	6565.19
[K].TAPYVPMYYVP.[N]	TAPYVPMYYVP		P07498	P07498 [42-52]	1300.63	48.87	17374	8911.71
[P].DEKVLDSGFREIENK.[A]	DEKVLDSGFREIENK		P01833	P01833 [583-597]	1778.89	29.33	17312.1	10267.8
[I].HWESASLL.[R]	HWESASLL		P01024	P01024 [1312-1319]	942.468	34.11	17225.9	16595.7
[S].VPQPKVLPIPQQVV.[P]	VPQPKVLPIPQQVV		P05814	P05814 [171-184]	1541.94	36.14	17042.9	12494.3
[E].TIESLSSSEESITEYK.[Q]	TIESLSSSEESITEYK		P05814	P05814 [18-33]	1802.85	32.5	17029.5	8597.99
[L].QPLMQQVPQPIPQ.[T]	QPLMQQVPQPIPQ	1xOxidation [M4]	P05814	P05814 [147-159]	1519.79	28.94	16987.4	12728.8
[H].VQVPFQQLNQ.[L]	VQVPFQQLNQ		P47710	P47710 [132-141]	1200.64	28.53	16934.2	15449.1
[R].PDIQYPDATDEDITSH.[M]	PDIQYPDATDEDITSH		P10451	P10451 [177-192]	1816.79	28.14	16888	8563.44
[F].SDISNPTAHENYEKNN.[V]	SDISNPTAHENYEKNN		P47710	P47710 [165-180]	1832.8	18.09	16735.7	16735.7
[K].SSSYSKQFTSSTSYNRGDSTFES.[K]	SSSYSKQFTSSTSYNRGDSTFES		P02671	P02671 [576-598]	2553.1	16.72	16687.9	16687.9
[F].FDPQIPKLTDLENLHLPLPLLQPL.[M]	FDPQIPKLTDLENLHLPLPLLQPL		P05814	P05814 [126-149]	2764.56	52.61	16677.4	15664.7
[V].PQPEIMEVPKAKDTVYTKG.[R]	PQPEIMEVPKAKDTVYTKG		P05814	P05814 [94-112]	2131.11	39	16664	13505.4
[Y].PFVEPIPYGFLPQNILP.[L]	PFVEPIPYGFLPQNILP		P05814	P05814 [67-83]	1941.05	45.3	16612.3	14736.5
[L].IYPFVEPIPYGFLPQNILPLAQPAVVLPVPQPEIMEVPK.[A]	IYPFVEPIPYGFLPQNILPLAQPAVVLPVPQPEIMEVPK	1xOxidation [M35]	P05814	P05814 [65-103]	4369.4	44.96	16531.9	11878.9
[L].PLAQPAVVLPVPQPEI.[M]	PLAQPAVVLPVPQPEI		P05814	P05814 [83-98]	1667.97	49.9	16518.9	9203.87
[Q].NPSESSEPIPLESRE.[E]	NPSESSEPIPLESRE		P47710	P47710 [29-43]	1670.79	25.6	16493.8	6996.26
[E].SLSSSEESITEYKQKVE.[K]	SLSSSEESITEYKQKVE	1xPhospho [S5]	P05814	P05814 [21-37]	2023.91	25.74	16463.8	11870.6
[L].PVPQPEIMEVPKAKDTV.[Y]	PVPQPEIMEVPKAKDTV	1xOxidation [M8]	P05814	P05814 [92-108]	1894	18.48	16443.5	13324.8
[R].LQNPSESSEPIPLESREEYMN.[G]	LQNPSESSEPIPLESREEYMN	2xPhospho [S8; S15]	P47710	P47710 [27-47]	2609.05	40.3	16429.9	12200.1
[V].LDSGFREIENK.[A]	LDSGFREIENK		P01833	P01833 [587-597]	1307.66	15.16	16412.2	16412.2
[D].SGEGDFLAEGGGVR.[G]	SGEGDFLAEGGGVR		P02671	P02671 [22-35]	1350.63	27.78	16400.3	11488.7
[I].YPFVEPIPYGFLPQNILPLAQPAVVLPVPQPEIMEVPKA.[K]	YPFVEPIPYGFLPQNILPLAQPAVVLPVPQPEIMEVPKA	1xOxidation [M34]	P05814	P05814 [66-104]	4327.35	45.21	16385.8	9184.28
[L].PVPQPEIMEVPKAKDTVYTK.[G]	PVPQPEIMEVPKAKDTVYTK		P05814	P05814 [92-111]	2270.21	45.8	16377.6	11013.3
[K].DTVYTKGRVMPVLKSPTIP.[F]	DTVYTKGRVMPVLKSPTIP		P05814	P05814 [106-124]	2102.17	29.95	16270.1	11440.7
[R].AVPVQALLLNQELLLNPTH.[Q]	AVPVQALLLNQELLLNPTH		P05814	P05814 [190-208]	2083.19	50.86	16203.4	8608.69
[S].KEIPLSPMGEDSAPRDA.[D]	KEIPLSPMGEDSAPRDA	1xOxidation [M8]	Q13410	Q13410 [493-509]	1828.87	14.75	16194.7	12711.6
[K].AKDTVYTKGRVMPVLKSPTIP.[F]	AKDTVYTKGRVMPVLKSPTIP		P05814	P05814 [104-124]	2301.3	24.46	16052.1	16052.1
[L].ALPPQPLWSVP.[Q]	ALPPQPLWSVP		P05814	P05814 [162-172]	1204.67	41.47	15884.4	11178.7
[K].LPLRYPERLQNPS.[E]	LPLRYPERLQNPS		P47710	P47710 [19-31]	1582.87	19.29	15881.5	10315.1
[A].DGSRASVDSGSSEEQGGSSRALVS.[T]	DGSRASVDSGSSEEQGGSSRALVS		P01833	P01833 [619-642]	2325.05	12.39	15788.3	11926.5
[D].SGSSEEQGGSSRALVSTLV.[P]	SGSSEEQGGSSRALVSTLV		P01833	P01833 [627-645]	1850.91	35.64	15765.4	6727.52
[S].YETSQLDDQSAETHSHKQSRLY.[K]	YETSQLDDQSAETHSHKQSRLY	1xPhospho [T/S]	P10451	P10451 [225-246]	2703.17	22.18	15688.4	15688.4
[T].DEDITSHMESEELNGA.[Y]	DEDITSHMESEELNGA		P10451	P10451 [186-201]	1776.72	29.11	15642	9781.65
[R].TYYANPAVV.[R]	TYYANPAVV		P07498	P07498 [79-87]	997.499	19.83	15637.2	10916.1
[N].LLAPQNAVSSEETNDFK.[Q]	LLAPQNAVSSEETNDFK	2xPhospho [S9; S10]	P10451	P10451 [54-70]	2022.85	26.14	15627.2	15627.2
[H].ENDERPFYQ.[K]	ENDERPFYQ		P07498	P07498 [32-40]	1197.52	14.76	15619.6	9542.77
[L].PLAQPAVVLPVPQPEIMEVPK.[A]	PLAQPAVVLPVPQPEIMEVPK	1xOxidation [M17]	P05814	P05814 [83-103]	2268.27	48.07	15585.4	8329.48
[A].DTRDQADGSRASVDSGSSEEQGGSS.[R]	DTRDQADGSRASVDSGSSEEQGGSS		P01833	P01833 [613-637]	2485.03	4.46	15516.4	8416.97
[R].GKDSYETSQLDDQSAETHSHK.[Q]	GKDSYETSQLDDQSAETHSHK	1xPhospho [S4]	P10451	P10451 [221-241]	2443	18.99	15500.4	12291.5
[R].AVPVQALLLNQELLLNPTHQIY.[P]	AVPVQALLLNQELLLNPTHQIY		P05814	P05814 [190-211]	2487.4	43.61	15488.8	9600.82
[P].TKALENPQPHPGWQGTL.[K]	TKALENPQPHPGWQGTL		P19835	P19835 [59-75]	1873.96	29.36	15447.7	14337.6
[A].IPVKQADSGSSEEKQLYNKYPDAVA.[T]	IPVKQADSGSSEEKQLYNKYPDAVA	2xPhospho [S10; S11]	P10451	P10451 [17-41]	2897.3	22	15399.1	9983.48
[K].TAPYVPMYYVPNSYPYYGTNL.[Y]	TAPYVPMYYVPNSYPYYGTNL	1xOxidation [M7]	P07498	P07498 [42-62]	2489.14	49.05	15341.7	9820.07
[P].DATDEDITSHMESEELNGAY.[K]	DATDEDITSHMESEELNGAY	1xOxidation [M11]	P10451	P10451 [183-202]	2242.89	27.66	15251.5	8214.5
[M].EVPKAKDTVYTKG.[R]	EVPKAKDTVYTKG		P05814	P05814 [100-112]	1435.78	12.97	15249.1	12793.1
[L].PNSHPPTVVRRPNLHPSF.[I]	PNSHPPTVVRRPNLHPSF		P07498	P07498 [100-117]	2052.09	28.86	15231.4	15231.4
[A].RETIESLSSSEESITEYKQK.[V]	RETIESLSSSEESITEYKQK		P05814	P05814 [16-35]	2344.15	27.65	15128.6	6328.06
[R].DASGVTFTWTPSSGK.[S]	DASGVTFTWTPSSGK		P01876	P01876 [154-168]	1540.73	28.48	15077.1	13771.2
[D].ATDEDITSHMESEELNGAYK.[A]	ATDEDITSHMESEELNGAYK	1xOxidation [M10]	P10451	P10451 [184-203]	2255.96	23.48	15065.8	10655.1
[K].LTDLENLHLPLPLLQPLM.[Q]	LTDLENLHLPLPLLQPLM	1xOxidation [M18]	P05814	P05814 [133-150]	2086.16	44.28	14980.4	7246.3
[P].LESREEYMNGMNR.[Q]	LESREEYMNGMNR		P47710	P47710 [39-51]	1628.72	21.83	14973.2	13584
[F].FDPQIPKLTDLENLHLPLPLLQP.[L]	FDPQIPKLTDLENLHLPLPLLQP		P05814	P05814 [126-148]	2651.48	44.31	14922.7	14922.7
[L].PVPQPEIMEVP.[K]	PVPQPEIMEVP	1xOxidation [M8]	P05814	P05814 [92-102]	1251.63	24.85	14883.4	7996.5
[I].YPFVEPIPYGFLPQNILPLAQP.[A]	YPFVEPIPYGFLPQNILPLAQP		P05814	P05814 [66-87]	2513.35	45.04	14879.3	8063.03
[P].FFDPQIPKLTDL.[E]	FFDPQIPKLTDL		P05814	P05814 [125-136]	1433.77	42.76	14843.5	9971.71
[A].INNPYVPRTYYANPAVVRPHA.[Q]	INNPYVPRTYYANPAVVRPHA		P07498	P07498 [71-91]	2412.26	23.71	14806.8	14806.8
[E].RLQNPSESSEPIPLESR.[E]	RLQNPSESSEPIPLESR	1xPhospho [S16]	P47710	P47710 [26-42]	2018.95	26.58	14727.3	8421.43
[A].NDESNEHSDVIDSQE.[L]	NDESNEHSDVIDSQE		P10451	P10451 [251-265]	1717.68	10.72	14615.6	13357.9
[V].SLAKADAAPDEKVLDSGFREIENK.[A]	SLAKADAAPDEKVLDSGFREIENK		P01833	P01833 [574-597]	2603.33	34.67	14454.9	6902.69
[L].AKADAAPDEKVLDSGFR.[E]	AKADAAPDEKVLDSGFR		P01833	P01833 [576-592]	1789.91	33.15	14448.6	9265.39
[F].DIPKSVRPNDEVTAVLA.[V]	DIPKSVRPNDEVTAVLA		P12273	P12273 [41-57]	1823.99	34.99	14424.2	14424.2
[F].SDISNPTAHENYEKNNVM.[L]	SDISNPTAHENYEKNNVM		P47710	P47710 [165-182]	2062.91	22.32	14117.5	12069.8
[S].APRDADTLHSKLIPTQPSQGAP.[-]	APRDADTLHSKLIPTQPSQGAP		Q13410	Q13410 [505-526]	2300.2	25.94	14081.3	7542.54
[L].ESREEYMNGMNRQRNIL.[R]	ESREEYMNGMNRQRNIL	1xOxidation [M10]	P47710	P47710 [40-56]	2156	14.92	14007.7	10407
[R].SPYEKVSAGNGGSSL.[S]	SPYEKVSAGNGGSSL		P15941	P15941 [1227-1241]	1452.7	22.66	13983.6	7420.68
[K].SPTIPFFDPQIPKLTDLENLHLPLPLLQP.[L]	SPTIPFFDPQIPKLTDLENLHLPLPLLQP		P05814	P05814 [120-148]	3293.82	44.84	13983.1	9363.99
[S].PTIPFFDPQIPKLTD.[L]	PTIPFFDPQIPKLTD		P05814	P05814 [121-135]	1728.92	50.4	13926.5	6914.87
[R].EEYMNGMNRQ.[R]	EEYMNGMNRQ		P47710	P47710 [43-52]	1271.51	20.43	13911.3	10267
[R].DLSRLPQLVGVS.[T]	DLSRLPQLVGVS		P15291	P15291 [46-57]	1283.73	46.84	13884.6	8192.12
[E].RLQNPSESSEPIPLESREE.[Y]	RLQNPSESSEPIPLESREE	2xPhospho [S9; S16]	P47710	P47710 [26-44]	2357.01	20.7	13854.9	9280.88
[Q].YPDATDEDIT.[S]	YPDATDEDIT		P10451	P10451 [181-190]	1139.47	24.17	13846.6	10278.4
[Y].GFLPQNILPLAQPAVVLPVPQPEIME.[V]	GFLPQNILPLAQPAVVLPVPQPEIME		P05814	P05814 [75-100]	2810.55	44.67	13839.8	8069.06
[L].TGLRPGTEYGIGVSAVKEDKESNPAT.[I]	TGLRPGTEYGIGVSAVKEDKESNPAT		P24821	P24821 [953-978]	2676.35	26.5	13789	13789
[K].LPLRYPERLQNPSES.[S]	LPLRYPERLQNPSES		P47710	P47710 [19-33]	1798.94	19.78	13773	13773
[F].VEPIPYGFLPQNILPL.[A]	VEPIPYGFLPQNILPL		P05814	P05814 [69-84]	1810.01	44.9	13750.1	10146
[L].QNPSESSEPIPLES.[R]	QNPSESSEPIPLES		P47710	P47710 [28-41]	1513.7	29.01	13647.5	8816.95
[P].LRYPERLQNPSES.[S]	LRYPERLQNPSES		P47710	P47710 [21-33]	1588.81	23.02	13590	13590
[V].LPVPQPEIMEVPKAKDTVYTK.[G]	LPVPQPEIMEVPKAKDTVYTK		P05814	P05814 [91-111]	2383.29	29.22	13579.5	6775.3
[K].SPIFGPEEVNSVEGNSVS.[I]	SPIFGPEEVNSVEGNSVS		P01833	P01833 [20-37]	1847.87	32.66	13579.3	13579.3
[M].GEDSAPRDADTLHSKLIPTQPSQGAP.[-]	GEDSAPRDADTLHSKLIPTQPSQGAP		Q13410	Q13410 [501-526]	2688.32	19.26	13577.5	10851.5
[I].PVAQDLNAPSDWDSRGKDSYETSQLDDQSAETHSH.[K]	PVAQDLNAPSDWDSRGKDSYETSQLDDQSAETHSH		P10451	P10451 [206-240]	3886.7	28.17	13483.2	9069.98
[P].LESREEYMNG.[M]	LESREEYMNG	1xPhospho [S3]	P47710	P47710 [39-48]	1307.5	13.88	13366.3	7403.39
[V].MPVLKSPTIPFFDPQIPKLTDLEN.[L]	MPVLKSPTIPFFDPQIPKLTDLEN		P05814	P05814 [115-138]	2740.46	42.81	13350.1	13350.1
[V].SPAVLVHRDGREQEAEQMPEYRG.[R]	SPAVLVHRDGREQEAEQMPEYRG		Q13410	Q13410 [71-93]	2654.27	23.58	13333.9	7948.46
[I].LPLAQPAVVLPVPQPEIMEVPK.[A]	LPLAQPAVVLPVPQPEIMEVPK	1xOxidation [M18]	P05814	P05814 [82-103]	2381.35	40.98	13294.5	13294.5
[L].QPLMQQVPQPI.[P]	QPLMQQVPQPI	1xOxidation [M4]	P05814	P05814 [147-157]	1294.68	30.54	13290.4	13290.4
[P].LAQPAVVLPVPQPEIM.[E]	LAQPAVVLPVPQPEIM	1xOxidation [M16]	P05814	P05814 [84-99]	1717.96	48.46	13252.8	8109.21
[S].KEIPLSPMGEDS.[A]	KEIPLSPMGEDS	1xOxidation [M8]	Q13410	Q13410 [493-504]	1318.62	22.76	13187.1	7044.52
[K].DDPDAPLQPVTPLQLF.[E]	DDPDAPLQPVTPLQLF		P0C0L4	P0C0L5 [1429-1444]	1765.9	43.79	13136.6	6975.93
[E].TIESLSSSEESITEYK.[Q]	TIESLSSSEESITEYK	1xPhospho [S7]	P05814	P05814 [18-33]	1882.82	36.59	13125.4	8145.91
[A].KVEQAVETEPEPEL.[R]	KVEQAVETEPEPEL		P02649	P02649 [19-32]	1597.8	26.96	13089.7	5370.26
[N].ILPLAQPAVVLPVPQPEIM.[E]	ILPLAQPAVVLPVPQPEIM		P05814	P05814 [81-99]	2025.18	43.78	13018.1	7444.29
[D].GSRASVDSGSSEEQGGSSRALVSTLV.[P]	GSRASVDSGSSEEQGGSSRALVSTLV		P01833	P01833 [620-645]	2523.23	33.26	13016.4	8030.82
[F].VEPIPYGFLPQNILPLAQPAVVLPVPQPE.[I]	VEPIPYGFLPQNILPLAQPAVVLPVPQPE		P05814	P05814 [69-97]	3135.75	44.9	13007.3	13007.3
[A].VPVQALLLNQELLLNPT.[H]	VPVQALLLNQELLLNPT		P05814	P05814 [191-207]	1875.09	43.39	12968.1	7625.4
[K].TAPYVPMYYVPNSYP.[Y]	TAPYVPMYYVPNSYP	1xOxidation [M7]	P07498	P07498 [42-56]	1777.81	37.96	12944.9	12944.9
[P].LWSVPQPKVLPIPQQVVP.[Y]	LWSVPQPKVLPIPQQVVP		P05814	P05814 [168-185]	2025.19	41.91	12846	10553.7
[Q].LTYNPDESSKPNMIDAATLK.[S]	LTYNPDESSKPNMIDAATLK	1xOxidation [M13]	P02679	P02679 [92-111]	2224.08	26.06	12822.2	10592.7
[K].AIQLTYNPDESSKPNMIDAATLK.[S]	AIQLTYNPDESSKPNMIDAATLK	1xOxidation [M16]	P02679	P02679 [89-111]	2536.26	26.51	12643.7	8798.15
[A].DTLHSKLIPTQPSQGAP.[-]	DTLHSKLIPTQPSQGAP		Q13410	Q13410 [510-526]	1789.94	19.35	12513	7796.08
[A].IPVKQADSGSSEEKQLY.[N]	IPVKQADSGSSEEKQLY		P10451	P10451 [17-33]	1878.94	22.54	12510.9	5611.83
[Q].PLMQQVPQPIPQTL.[A]	PLMQQVPQPIPQTL	1xOxidation [M3]	P05814	P05814 [148-161]	1605.87	33.02	12474.1	7984.83
[G].SSRALVSTLV.[P]	SSRALVSTLV		P01833	P01833 [636-645]	1032.6	33.26	12434.5	10919.7
[R].VMPVLKSPTIPF.[F]	VMPVLKSPTIPF		P05814	P05814 [114-125]	1328.76	48.86	12346.5	6145.29
[P].LLQPLMQQVPQPIPQTLA.[L]	LLQPLMQQVPQPIPQTLA		P05814	P05814 [145-162]	2015.14	41.63	12306.6	7049.79
[T].DEDITSHMESEELNGAY.[K]	DEDITSHMESEELNGAY	1xPhospho [S10]; 1xOxidation [M8]	P10451	P10451 [186-202]	2035.75	28.21	12279.4	8393.4
[K].NADLQVLKPEPELVYED.[L]	NADLQVLKPEPELVYED		P01833	P01833 [232-248]	1971.99	45.48	12266.2	12266.2
[N].PTHQIYPVTQPLAPV.[H]	PTHQIYPVTQPLAPV		P05814	P05814 [206-220]	1660.91	30.4	12244.6	10905
[M].DKVERLKQVL.[L]	DKVERLKQVL		P02788	P02788 [623-632]	1227.74	16.08	12232.3	12232.3
[L].ENLHLPLPLLQPL.[M]	ENLHLPLPLLQPL		P05814	P05814 [137-149]	1496.88	43.82	12198.1	8492.9
[R].EEYMNGMNRQRNIL.[R]	EEYMNGMNRQRNIL	1xOxidation [M4]	P47710	P47710 [43-56]	1783.82	16.09	12186.8	8919.44
[S].NVAGVVIIV.[I]	NVAGVVIIV		P22897	P22897 [1387-1395]	883.561	48.48	12185	6401.92
[P].VLGGNSNSNSSGGAGTVGRGLVSDGTSPGERW.[T]	VLGGNSNSNSSGGAGTVGRGLVSDGTSPGERW	1xPhospho [T16]	Q9NRF2	Q9NRF2 [193-224]	3112.41	21.28	12183.8	9039.69
[S].LAKADAAPDEK.[V]	LAKADAAPDEK		P01833	P01833 [575-585]	1128.59	21.21	12129.4	9045.93
[E].ETKENEGFTVTAEGK.[G]	ETKENEGFTVTAEGK		P01024	P01024 [1323-1337]	1639.78	13.07	12101.7	10692.3
[R].ETIESLSSSEESITEYKQKV.[E]	ETIESLSSSEESITEYKQKV	1xPhospho [S9]	P05814	P05814 [17-36]	2367.09	34.38	12077.3	6531.86
[R].LNEYNQLQLQAAHAQE.[Q]	LNEYNQLQLQAAHAQE		P47710	P47710 [106-121]	1869.91	28.86	12050.6	10544.9
[E].PIPLESREEYMNGMN.[R]	PIPLESREEYMNGMN	1xPhospho [S6]; 2xOxidation [M11; M14]	P47710	P47710 [36-50]	1891.76	26.04	12049	8818.59
[N].PSESSEPIP.[L]	PSESSEPIP		P47710	P47710 [30-38]	942.441	14.7	11932.5	8098.1
[P].LMQQVPQPIPQTL.[A]	LMQQVPQPIPQTL		P05814	P05814 [149-161]	1492.82	36.17	11906.3	10909.2
[G].DQTVSDNELQEMSNQGSK.[Y]	DQTVSDNELQEMSNQGSK	1xOxidation [M12]	P10909	P10909 [23-40]	2025.87	12.33	11858.9	11858.9
[P].VYEPVSYHVQE.[S]	VYEPVSYHVQE		P15311	P15311 [477-487]	1349.64	25.56	11836.4	6731.57
[A].VPVQALLLNQELLLNPTHQI.[Y]	VPVQALLLNQELLLNPTHQI		P05814	P05814 [191-210]	2253.3	50.97	11799.7	11799.7
[Y].GFLPQNILPLAQPAVVLPVPQPE.[I]	GFLPQNILPLAQPAVVLPVPQPE		P05814	P05814 [75-97]	2437.39	44.28	11732	8504.32
[F].RISHELDSASSEVN.[-]	RISHELDSASSEVN		P10451	P10451 [301-314]	1543.73	11.76	11674.8	6357.35
[R].LPQLVGVSTPLQGGSNSAAA.[I]	LPQLVGVSTPLQGGSNSAAA		P15291	P15291 [50-69]	1866.99	38.09	11567.3	11567.3
[P].FPPFSDISNPTAHENYEKNNVM.[L]	FPPFSDISNPTAHENYEKNNVM	1xOxidation [M22]	P47710	P47710 [161-182]	2567.15	30.36	11482.7	8498.48
[L].SALEEYTKKLNTQ.[-]	SALEEYTKKLNTQ		P02647	P02647 [255-267]	1524.79	26.15	11453.7	11453.7
[M].ASGVAVSDGVIK.[V]	ASGVAVSDGVIK	1xAcetyl [N-Term]	P23528	P23528 [2-13]	1144.62	29.28	11370.5	5455.47
[P].LIYPFVEPIPYGFLPQNILPLAQPAVVLPVPQPEIMEVPKA.[K]	LIYPFVEPIPYGFLPQNILPLAQPAVVLPVPQPEIMEVPKA	1xOxidation [M36]	P05814	P05814 [64-104]	4553.52	45.09	11259.2	7537.3
[S].NPTAHENYEK.[N]	NPTAHENYEK		P47710	P47710 [169-178]	1202.54	1.5	11255.5	11255.5
[P].QNILPLAQPAVVLPVPQPEIMEVPK.[A]	QNILPLAQPAVVLPVPQPEIMEVPK		P05814	P05814 [79-103]	2720.54	43.4	11225.6	10374.3
[A].APDEKVLDSGFREIENK.[A]	APDEKVLDSGFREIENK		P01833	P01833 [581-597]	1946.98	31.58	11169.1	4771.46
[F].DVSLEVSQGPG.[L]	DVSLEVSQGPG		P01833	P01833 [122-132]	1087.53	18.73	11140.8	11140.8
[R].EEYMNGMNRQRNIL.[R]	EEYMNGMNRQRNIL		P47710	P47710 [43-56]	1767.83	27.94	11076.4	8323.51
[L].PLAQPAVV.[L]	PLAQPAVV		P05814	P05814 [83-90]	794.477	26.67	11061.1	7680.4
[D].EDITSHMESEELNGAY.[K]	EDITSHMESEELNGAY	1xOxidation [M7]	P10451	P10451 [187-202]	1840.75	25.12	11052.6	11052.6
[S].SNVAGVVIIV.[I]	SNVAGVVIIV		P22897	P22897 [1386-1395]	970.593	48.37	11033.2	7454.12
[R].LQNPSESSEPIPLESREE.[Y]	LQNPSESSEPIPLESREE		P47710	P47710 [27-44]	2040.97	28.19	11012	11012
[P].ERLQNPSESSEPIPLESREEYMNGMN.[R]	ERLQNPSESSEPIPLESREEYMNGMN	2xOxidation [M22; M25]	P47710	P47710 [25-50]	3068.36	19.47	10996.2	9810.18
[D].EHQDKIYPSFQPQPLIYP.[F]	EHQDKIYPSFQPQPLIYP		P05814	P05814 [50-67]	2200.11	39.4	10968.3	10968.3
[K].DSHSLTTNIMEILRGDFSSANNR.[D]	DSHSLTTNIMEILRGDFSSANNR	1xOxidation [M10]	P02671	P02671 [101-123]	2594.23	49.39	10931	9538.62
[K].HEDQQQGEDEHQDKIYPSF.[Q]	HEDQQQGEDEHQDKIYPSF		P05814	P05814 [41-59]	2330	26.01	10874.3	8598.57
[R].DGREQEAEQMPEYR.[G]	DGREQEAEQMPEYR		Q13410	Q13410 [79-92]	1737.75	13.57	10816.3	5385.23
[D].ATDEDITSHMESEELNGAY.[K]	ATDEDITSHMESEELNGAY		P10451	P10451 [184-202]	2111.87	34.41	10807.4	5841.6
[Q].NPSESSEPIPLESREE.[Y]	NPSESSEPIPLESREE		P47710	P47710 [29-44]	1799.83	25.71	10790	6241.53
[S].EESITEYKQKVEK.[V]	EESITEYKQKVEK		P05814	P05814 [26-38]	1610.83	12.03	10695.4	9135.76
[A].RETIESLSSSEESITEYKQKV.[E]	RETIESLSSSEESITEYKQKV		P05814	P05814 [16-36]	2443.22	25.03	10676	6656.77
[T].DLENLHLPLPLLQPLM.[Q]	DLENLHLPLPLLQPLM	1xOxidation [M16]	P05814	P05814 [135-150]	1872.03	44.28	10647.8	6506.39
[G].SRASVDSGSSEEQGGSSRALVSTLVPLG.[L]	SRASVDSGSSEEQGGSSRALVSTLVPLG		P01833	P01833 [621-648]	2733.36	45.26	10493.3	4192.96
[A].DAAPDEKVLDS.[G]	DAAPDEKVLDS		P01833	P01833 [579-589]	1159.55	14.27	10448.4	7360.2
[S].DPITVTVPVEVSRKNP.[K]	DPITVTVPVEVSRKNP		P10909	P10909 [413-428]	1750.97	24.77	10316.8	9004.39
[D].DPDAPLQPV.[T]	DPDAPLQPV		P0C0L4	P0C0L5 [1430-1438]	951.478	27.4	10210.7	10210.7
[A].DSSPVKAGVETTTPSKQSNN.[K]	DSSPVKAGVETTTPSKQSNN		P0CG05	P0CG05 [45-64]	2046.99	10.55	10143.5	10143.5
[P].YPQRAVPVQA.[L]	YPQRAVPVQA		P05814	P05814 [186-195]	1128.62	22.09	10073.9	7947.57
[S].LAKADAAPDEKVLDSGF.[R]	LAKADAAPDEKVLDSGF		P01833	P01833 [575-591]	1746.89	23.52	10028.3	6696.27
[K].AIQLTYNPDESSKPNMIDAATL.[K]	AIQLTYNPDESSKPNMIDAATL		P02679	P02679 [89-110]	2392.17	47.39	10017.7	6762.8
[S].KEIPLSPMGE.[D]	KEIPLSPMGE		Q13410	Q13410 [493-502]	1100.57	28.32	9950.52	5274.61
[P].VKQADSGSSEEKQLYNKYPDAV.[A]	VKQADSGSSEEKQLYNKYPDAV	1xPhospho [S9]	P10451	P10451 [19-40]	2536.16	26.09	9891.96	9891.96
[L].SDQVPDTESET.[R]	SDQVPDTESET		P01024	P01024 [968-978]	1207.5	10.43	9822.46	8989.64
[H].ELDSASSEVN.[-]	ELDSASSEVN		P10451	P10451 [305-314]	1050.46	10.05	9661.18	6211.83
[E].RPFYQKTAPYVPM.[Y]	RPFYQKTAPYVPM		P07498	P07498 [36-48]	1597.82	33.21	9637.75	7344.11
[G].DSTFESKSY.[K]	DSTFESKSY		P02671	P02671 [593-601]	1063.46	20.33	9629.68	6654.82
[P].YGFLPQNILPLAQPAVVLPVPQPEIMEVPK.[A]	YGFLPQNILPLAQPAVVLPVPQPEIMEVPK		P05814	P05814 [74-103]	3297.83	44.4	9616.71	7314.28
[P].LIYPFVEPIPYGFLPQNILPLAQP.[A]	LIYPFVEPIPYGFLPQNILPLAQP		P05814	P05814 [64-87]	2739.52	45.38	9396.95	6127.41
[S].KEIPLSPMGEDSAPR.[D]	KEIPLSPMGEDSAPR	1xOxidation [M8]	Q13410	Q13410 [493-507]	1642.81	22.07	9390.95	4385.3
[R].MNENSHVQVPFQQL.[N]	MNENSHVQVPFQQL		P47710	P47710 [126-139]	1670.8	31.39	9377.06	4431.37
[T].APYVPMYYVPNSYPYYGTNL.[Y]	APYVPMYYVPNSYPYYGTNL		P07498	P07498 [43-62]	2372.09	42.2	9269.28	9269.28
[S].KEIPLSPMGED.[S]	KEIPLSPMGED	1xOxidation [M8]	Q13410	Q13410 [493-503]	1231.59	23.07	9234.18	4490.83
[Q].MYPLQEIQNLTVKLQ.[L]	MYPLQEIQNLTVKLQ	1xPhospho [T11]	Q9BYF1	Q9BYF1 [82-96]	1897.95	24.44	9228.6	6634.33
[P].VKQADSGSSEEKQLYNKYPDAVAT.[W]	VKQADSGSSEEKQLYNKYPDAVAT	2xPhospho [S8; S9]	P10451	P10451 [19-42]	2788.21	28.08	9191.53	9191.53
[L].IYPFVEPIPYGFLPQNILPL.[A]	IYPFVEPIPYGFLPQNILPL		P05814	P05814 [65-84]	2330.28	45.71	9152.59	9152.59
[W].DELKEAGVSD.[M]	DELKEAGVSD		O00592	O00592 [433-442]	1062.49	20.2	9111.21	4293.96
[Y].GFLPQNILPLAQPAVVLPVPQPEIMEVPKAKDTVYT.[K]	GFLPQNILPLAQPAVVLPVPQPEIMEVPKAKDTVYT		P05814	P05814 [75-110]	3913.15	43.54	9103.6	9103.6
[S].VPQPKVLPIPQQVVPYPQ.[R]	VPQPKVLPIPQQVVPYPQ		P05814	P05814 [171-188]	2027.17	39.35	8955.72	7147.12
[P].LIYPFVEPIPYGFLPQNI.[L]	LIYPFVEPIPYGFLPQNI		P05814	P05814 [64-81]	2120.15	44.1	8927.94	8927.94
[Q].ELLLNPTHQIYPVTQPLAPV.[H]	ELLLNPTHQIYPVTQPLAPV		P05814	P05814 [201-220]	2243.24	41.23	8841.17	5281.06
[L].DPAGPNFEYAEAPS.[R]	DPAGPNFEYAEAPS		P06858	P06858 [183-196]	1464.63	23.08	8820.84	8820.84
[R].DGREQEAEQMPEYRGR.[A]	DGREQEAEQMPEYRGR		Q13410	Q13410 [79-94]	1950.87	20.16	8762.68	6529.7
[T].IESLSSSEESITEYKQKVEKV.[K]	IESLSSSEESITEYKQKVEKV	1xPhospho [T12]	P05814	P05814 [19-39]	2493.2	32.16	8755.62	7927.53
[L].LLNQELLLNPTHQIYPVTQPLA.[P]	LLNQELLLNPTHQIYPVTQPLA		P05814	P05814 [197-218]	2515.39	41.27	8684.29	7605.48
[R].ETIESLSSSEESITEYKQ.[K]	ETIESLSSSEESITEYKQ	2xPhospho [S8; S9]	P05814	P05814 [17-34]	2219.89	36.7	8634.44	4221.31
[N].NVMLQW.[-]	NVMLQW	1xOxidation [M3]	P47710	P47710 [180-185]	806.387	32.56	8629.21	6476.85
[F].AEEKAVADTRDQADGS.[R]	AEEKAVADTRDQADGS		P01833	P01833 [606-621]	1662.76	4.35	8605.46	6729.53
[V].VLPVPQPEIMEVPKAK.[D]	VLPVPQPEIMEVPKAK	1xOxidation [M10]	P05814	P05814 [90-105]	1791.01	23.72	8501.93	8501.93
[I].MEVPKAKDTVYTK.[G]	MEVPKAKDTVYTK	1xOxidation [M1]	P05814	P05814 [99-111]	1525.79	10.36	8437.97	8437.97
[L].VGVSTPLQGGSNSAAAIGQSSGE.[L]	VGVSTPLQGGSNSAAAIGQSSGE		P15291	P15291 [54-76]	2074	30.01	8426.17	7654.51
[D].DPDAPLQPVTPLQLFEG.[R]	DPDAPLQPVTPLQLFEG		P0C0L4	P0C0L5 [1430-1446]	1836.94	44.1	8418.45	8418.45
[R].DRLDEVKEQVAEV.[R]	DRLDEVKEQVAEV		P02649	P02649 [245-257]	1529.78	30.6	8413.97	6493.32
[K].AIQDPRLFAEEKAV.[A]	AIQDPRLFAEEKAV		P01833	P01833 [598-611]	1586.85	32.72	8368.38	5340.5
[A].IQDPRLFAEEKAVADTR.[D]	IQDPRLFAEEKAVADTR		P01833	P01833 [599-615]	1959.03	29.46	8213.53	4198.36
[A].RETIESLSSSEESITEYKQKV.[E]	RETIESLSSSEESITEYKQKV	1xPhospho [T3]	P05814	P05814 [16-36]	2523.19	36.31	8134.31	7310.23
[K].LTDLENLHLPLPLL.[Q]	LTDLENLHLPLPLL		P05814	P05814 [133-146]	1600.93	44.34	8076.45	3153.36
[P].TIPFFDPQIPKLTDLENL.[H]	TIPFFDPQIPKLTDLENL		P05814	P05814 [122-139]	2101.12	43.9	7967.86	6355.38
[D].LENLHLPLPLLQPL.[M]	LENLHLPLPLLQPL		P05814	P05814 [136-149]	1609.97	44.13	7877.69	7273.04
[R].YPERLQNPSESSEPIPLES.[R]	YPERLQNPSESSEPIPLES		P47710	P47710 [23-41]	2172.05	25.86	7813.68	7813.68
[Y].GFLPQNILPLAQPAVVLPVPQP.[E]	GFLPQNILPLAQPAVVLPVPQP		P05814	P05814 [75-96]	2308.34	44.42	7617.27	6169.77
[V].QALLLNQELLLNPTHQIYPVTQPL.[A]	QALLLNQELLLNPTHQIYPVTQPL		P05814	P05814 [194-217]	2756.53	50.97	7616.46	5391.56
[P].EIMEVPKAKDTVYTK.[G]	EIMEVPKAKDTVYTK	1xOxidation [M3]	P05814	P05814 [97-111]	1767.92	20.38	7472.14	5501.92
[A].EEKAVADTRDQADGS.[R]	EEKAVADTRDQADGS		P01833	P01833 [607-621]	1591.72	1.58	7429.83	4502.34
[Q].ELLLNPTHQIYPVTQ.[P]	ELLLNPTHQIYPVTQ		P05814	P05814 [201-215]	1765.95	44.6	7414.24	5400.85
[K].AIPVAQDLNAPSDWDSRGKDSYETSQLD.[D]	AIPVAQDLNAPSDWDSRGKDSYETSQLD		P10451	P10451 [204-231]	3078.43	33.57	7398.59	6649.55
[F].VEPIPYGFLPQNILPLAQPAVVLPVPQPEIMEVPK.[A]	VEPIPYGFLPQNILPLAQPAVVLPVPQPEIMEVPK	1xOxidation [M31]	P05814	P05814 [69-103]	3849.13	52.4	7000.61	5538.73
[P].DAPLQPVTPLQ.[L]	DAPLQPVTPLQ		P0C0L4	P0C0L5 [1432-1442]	1178.64	34.51	6839.41	6380.78
[A].VPVQALLLNQELLL.[N]	VPVQALLLNQELLL		P05814	P05814 [191-204]	1562.95	52.26	6740.07	2804.35
[A].VVLPVPQPEIMEV.[P]	VVLPVPQPEIMEV		P05814	P05814 [89-101]	1449.8	42.27	6571.26	5751.61
[I].PYGFLPQNILPLAQPA.[V]	PYGFLPQNILPLAQPA		P05814	P05814 [73-88]	1738.95	43.58	6564.93	6564.93
[D].ATDEDITSHMESEELNGA.[Y]	ATDEDITSHMESEELNGA		P10451	P10451 [184-201]	1948.81	29.47	6558.57	4375.64
[S].KEIPLSPMGEDSAPRDA.[D]	KEIPLSPMGEDSAPRDA		Q13410	Q13410 [493-509]	1812.88	18	6497.23	5407.63
[T].VIANAQDLS.[K]	VIANAQDLS		Q13410	Q13410 [484-492]	930.489	22.84	6447.35	4070.77
[P].SFQPQPLIYPFVEPIPY.[G]	SFQPQPLIYPFVEPIPY		P05814	P05814 [58-74]	2035.06	52.19	6424.82	5153.97
[F].VEPIPYGFLPQNILPLAQP.[A]	VEPIPYGFLPQNILPLAQP		P05814	P05814 [69-87]	2106.16	44.3	6399.6	5987.45
[P].QPIPQTLALPPQP.[L]	QPIPQTLALPPQP		P05814	P05814 [155-167]	1399.79	34.63	6369.75	5543.36
[P].SSNVAGVVIIV.[I]	SSNVAGVVIIV		P22897	P22897 [1385-1395]	1057.63	48.35	6336.43	4300.67
[K].VLDSGFREIENKAIQ.[D]	VLDSGFREIENKAIQ		P01833	P01833 [586-600]	1718.91	34.1	6323.44	4792.02
[A].LVSTLVPLGLV.[L]	LVSTLVPLGLV		P01833	P01833 [640-650]	1110.71	51.77	6266.62	4853.21
[A].KLGAVYTEGGFVEGVN.[K]	KLGAVYTEGGFVEGVN		P19835	P19835 [22-37]	1639.83	27.32	6213.77	6213.77
[D].PDAPLQPVTPLQLFEG.[R]	PDAPLQPVTPLQLFEG		P0C0L4	P0C0L5 [1431-1446]	1721.91	43.83	6145.68	6145.68
[A].IQDPRLFAEEKAVA.[D]	IQDPRLFAEEKAVA		P01833	P01833 [599-612]	1586.85	23.17	6005.87	4304.6
[G].DFLAEGGGVR.[G]	DFLAEGGGVR		P02671	P02671 [26-35]	1020.51	18.34	5902.77	5902.77
[truncated: 42 more rows]

## Sheet: S.Table2
Supplementary Table 2. List of the peptides identified from the digested human milk samples
Annotated Sequence	Peptide sequence	Modifications	Master Protein Accessions	Positions in Proteins	Theo. MH+ [Da]	Retention time [min]	Average of abundances	Standard error
[F].FDPQIPK.[L]	FDPQIPK		P05814	P05814 [126-132]	844.456	20.49	3.28708e+09	3.71477e+08
[L].KSPTIPF.[F]	KSPTIPF		P05814	P05814 [119-125]	789.451	26.37	7.91327e+08	1.26312e+08
[L].ENLHLPLPL.[L]	ENLHLPLPL		P05814	P05814 [137-145]	1045.6	45.6	5.511e+08	1.30129e+08
[M].QQVPQPIPQT.[L]	QQVPQPIPQT		P05814	P05814 [151-160]	1135.61	20.45	5.09645e+08	7.50065e+07
[M].QQVPQPIPQ.[T]	QQVPQPIPQ		P05814	P05814 [151-159]	1034.56	19.86	4.90006e+08	7.80149e+07
[A].VVLPVPQPEI.[M]	VVLPVPQPEI		P05814	P05814 [89-98]	1090.65	44.04	4.70539e+08	9.94631e+07
[A].VVLPVPQPEIM.[E]	VVLPVPQPEIM		P05814	P05814 [89-99]	1221.69	45.07	4.07516e+08	1.00946e+08
[A].VVLPVPQPE.[I]	VVLPVPQPE		P05814	P05814 [89-97]	977.567	31.89	3.83242e+08	4.30708e+07
[Q].QVVPYPQ.[R]	QVVPYPQ		P05814	P05814 [182-188]	830.441	20.54	3.63299e+08	4.7027e+07
[Q].VVPYPQ.[R]	VVPYPQ		P05814	P05814 [183-188]	702.382	17.65	3.09589e+08	4.90993e+07
[E].NSHVQVPF.[Q]	NSHVQVPF		P47710	P47710 [129-136]	927.468	24.69	2.56272e+08	3.63953e+07
[Y].PVTQPLAPV.[H]	PVTQPLAPV		P05814	P05814 [212-220]	921.54	25.06	2.42242e+08	4.10244e+07
[S].HVQVPF.[Q]	HVQVPF		P47710	P47710 [131-136]	726.393	24.43	2.19809e+08	3.35744e+07
[L].ALPPQPL.[W]	ALPPQPL		P05814	P05814 [162-168]	735.44	24.13	1.69705e+08	2.61144e+07
[V].LPVPQPEIM.[E]	LPVPQPEIM		P05814	P05814 [91-99]	1023.55	38.72	1.49062e+08	2.31646e+07
[Q].PAVVLPVPQPE.[I]	PAVVLPVPQPE		P05814	P05814 [87-97]	1145.66	37.69	1.31778e+08	1.72293e+07
[Q].IYPVTQPL.[A]	IYPVTQPL		P05814	P05814 [210-217]	930.529	31.44	1.1691e+08	2.04009e+07
[K].IYPSFQPQPL.[I]	IYPSFQPQPL		P05814	P05814 [55-64]	1189.63	41.17	1.15173e+08	2.83972e+07
[A].INNPYVPR.[T]	INNPYVPR		P07498	P07498 [71-78]	972.526	18.53	1.1437e+08	2.51212e+07
[A].IVENNESTEYG.[L]	IVENNESTEYG		P00709	P00709 [60-70]	1254.55	15.42	1.13328e+08	2.35923e+07
[R].LQNPSESSEPIPL.[E]	LQNPSESSEPIPL	1xPhospho [S]	P47710	P47710 [27-39]	1490.68	37.28	1.05141e+08	2.09168e+07
[R].VATYLPAPEG.[L]	VATYLPAPEG		P24821	P24821 [708-717]	1017.53	25.72	9.97723e+07	1.96159e+07
[W].KVDNALQSGNSQESVTEQDSKDST.[Y]	KVDNALQSGNSQESVTEQDSKDST		P01834	P01834 [41-64]	2567.17	15.78	9.71892e+07	7.34188e+07
[T].KSPIFGPEEV.[N]	KSPIFGPEEV		P01833	P01833 [19-28]	1102.58	27.93	95770740	3.25268e+07
[M].VGHEALPL.[A]	VGHEALPL		P01876; P01877	P01876 [315-322]	835.467	23.71	9.52383e+07	3.49551e+07
[L].PVPQPEIM.[E]	PVPQPEIM		P05814	P05814 [92-99]	910.47	27.37	9.04784e+07	1.19936e+07
[A].IVENNESTEY.[G]	IVENNESTEY		P00709	P00709 [60-69]	1197.53	16.08	8.2572e+07	2.15116e+07
[V].FDTGSSNLWVPS.[I]	FDTGSSNLWVPS		P07339	P07339 [96-107]	1309.61	40.17	7.91372e+07	8.07825e+06
[K].SPTIPF.[F]	SPTIPF		P05814	P05814 [120-125]	661.356	34.18	7.89563e+07	1.97857e+07
[Y].PFVEPIPY.[G]	PFVEPIPY		P05814	P05814 [67-74]	961.503	42.82	7.85474e+07	2.37487e+07
[M].QQVPQPI.[P]	QQVPQPI		P05814	P05814 [151-157]	809.452	20.04	7.75225e+07	1.11555e+07
[Y].PSFQPQPL.[I]	PSFQPQPL		P05814	P05814 [57-64]	913.478	27.64	7.58893e+07	1.26984e+07
[Q].PAVVLPVPQPEI.[M]	PAVVLPVPQPEI		P05814	P05814 [87-98]	1258.74	45.09	7.51829e+07	1.79819e+07
[K].SGNTFRPEV.[H]	SGNTFRPEV		P01876; P01877	P01876 [222-230]	1006.5	19.83	7.21847e+07	2.89693e+07
[Y].KQIGLYPV.[L]	KQIGLYPV		P01833	P01833 [167-174]	917.545	26.57	6.77092e+07	4.70372e+07
[L].ENLHLPLP.[L]	ENLHLPLP		P05814	P05814 [137-144]	932.52	39.89	6.35611e+07	1.58953e+07
[F].EDLSDEAERDEYE.[L]	EDLSDEAERDEYE		P02788	P02788 [235-247]	1599.63	19.07	6.03292e+07	9.43678e+06
[V].LPVPQPEI.[M]	LPVPQPEI		P05814	P05814 [91-98]	892.514	34.13	6.02391e+07	1.06891e+07
[L].QVLKPEPEL.[V]	QVLKPEPEL		P01833	P01833 [236-244]	1052.6	22.9	5.97167e+07	8.39451e+06
[Q].PAVVLPVPQ.[P]	PAVVLPVPQ		P05814	P05814 [87-95]	919.561	34.71	5.64725e+07	8.40694e+06
[V].LPVPQPE.[I]	LPVPQPE		P05814	P05814 [91-97]	779.43	20.79	5.0657e+07	5.38852e+06
[R].ILLNPQDKDGS.[F]	ILLNPQDKDGS		P01833	P01833 [297-307]	1199.63	18.95	4.67394e+07	2.42772e+07
[R].QYLPNSHPPT.[V]	QYLPNSHPPT		P07498	P07498 [97-106]	1153.56	17.44	4.62005e+07	1.70982e+07
[R].IRLDIQGTGQ.[L]	IRLDIQGTGQ		P01833	P01833 [191-200]	1100.61	22.39	4.61352e+07	3.58194e+07
[R].NFPPSQDASGDL.[Y]	NFPPSQDASGDL		P01876; P01877	P01876 [52-63]	1247.55	30.71	4.57897e+07	2.63312e+07
[Q].PLMQQVPQPI.[P]	PLMQQVPQPI		P05814	P05814 [148-157]	1150.63	34.89	4.35763e+07	9.75418e+06
[F].EDLSDEAERDE.[Y]	EDLSDEAERDE		P02788	P02788 [235-245]	1307.52	15.81	4.33374e+07	2.32059e+07
[F].DTGSSNLWVPS.[I]	DTGSSNLWVPS		P07339	P07339 [97-107]	1162.54	32.58	42727903	3.64863e+06
[L].NPTHQIYPV.[T]	NPTHQIYPV		P05814	P05814 [205-213]	1068.55	20.23	4.15589e+07	9.8533e+06
[R].SSEDPNEDIVER.[N]	SSEDPNEDIVER		P01591	P01591 [47-58]	1389.61	16.64	4.10775e+07	3.0196e+07
[S].FQPQPL.[I]	FQPQPL		P05814	P05814 [59-64]	729.393	23.21	3.77511e+07	7.24742e+06
[Q].VLKPEPEL.[V]	VLKPEPEL		P01833	P01833 [237-244]	924.54	21.69	3.52938e+07	2.16885e+07
[A].VVLPVPQPEIM.[E]	VVLPVPQPEIM	1xOxidation [M11]	P05814	P05814 [89-99]	1237.69	40.31	3.4263e+07	5.60994e+06
[L].PVPQPEI.[M]	PVPQPEI		P05814	P05814 [92-98]	779.43	23.46	3.36094e+07	3.54123e+06
[V].FDTGSSNL.[W]	FDTGSSNL		P07339	P07339 [96-103]	840.373	19.78	3.18473e+07	3.60698e+06
[L].MQQVPQPIPQT.[L]	MQQVPQPIPQT	1xOxidation [M1]	P05814	P05814 [150-160]	1282.65	20.79	3.07016e+07	8.7294e+06
[Q].PAVVLPVPQPEIM.[E]	PAVVLPVPQPEIM		P05814	P05814 [87-99]	1389.78	45.92	2.97839e+07	7.11028e+06
[M].QQVPQPIP.[Q]	QQVPQPIP		P05814	P05814 [151-158]	906.504	22.3	2.87654e+07	6.63165e+06
[T].HQIYPVTQPL.[A]	HQIYPVTQPL		P05814	P05814 [208-217]	1195.65	26.56	2.83548e+07	7.2462e+06
[L].LNPTHQIYPV.[T]	LNPTHQIYPV		P05814	P05814 [204-213]	1181.63	23.96	2.82559e+07	8.77155e+06
[T].KSPIFGPEEVN.[S]	KSPIFGPEEVN		P01833	P01833 [19-29]	1216.62	23.5	2.82137e+07	5.15292e+06
[H].LLPPPSEEL.[A]	LLPPPSEEL		P01876; P01877	P01876 [232-240]	994.546	31.77	2.766e+07	1.55527e+07
[L].MQQVPQPIPQ.[T]	MQQVPQPIPQ	1xOxidation [M1]	P05814	P05814 [150-159]	1181.6	20.2	2.73643e+07	7.55631e+06
[R].GFSPKDVLV.[R]	GFSPKDVLV		P01876; P01877	P01876 [254-262]	961.535	33.5	2.71507e+07	2.45943e+07
[R].LQNPSESSEPIPL.[E]	LQNPSESSEPIPL		P47710	P47710 [27-39]	1410.71	33.93	2.5118e+07	5.67369e+06
[Q].QVPQPIPQT.[L]	QVPQPIPQT		P05814	P05814 [152-160]	1007.55	20.19	2.47777e+07	4.31837e+06
[L].EVDETYVPK.[E]	EVDETYVPK		P02768	P02768 [516-524]	1079.53	17.29	2.46977e+07	9.29391e+06
[A].RETIESL.[S]	RETIESL	1xPhospho [S/T]	P05814	P05814 [16-22]	927.418	21.61	2.42385e+07	3.61048e+06
[L].SVTWSESGQGVTA.[R]	SVTWSESGQGVTA		P01876	P01876 [38-50]	1308.61	23.11	2.42267e+07	1.48285e+07
[Q].QVPQPIPQ.[T]	QVPQPIPQ		P05814	P05814 [152-159]	906.504	19.5	2.38861e+07	4.22036e+06
[Q].YVPFPPFSD.[I]	YVPFPPFSD		P47710	P47710 [158-166]	1068.5	45.59	2.37822e+07	4.48425e+06
[R].RPDIQYPDATDE.[D]	RPDIQYPDATDE		P10451	P10451 [176-187]	1419.64	19.6	2.36252e+07	6.04488e+06
[L].VQGFFPQEPL.[S]	VQGFFPQEPL		P01876; P01877	P01876 [28-37]	1161.59	44.56	2.29674e+07	1.26042e+07
[V].FDEFKPL.[V]	FDEFKPL		P02768	P02768 [398-404]	895.456	31.36	2.18305e+07	1.01945e+07
[W].TGPPEPIE.[A]	TGPPEPIE		P02788	P02788 [158-165]	839.415	18.45	2.1783e+07	2.8885e+06
[Q].YVPFPPFSDISNPT.[A]	YVPFPPFSDISNPT		P47710	P47710 [158-171]	1580.76	46.52	2.17374e+07	4.68564e+06
[V].VLPVPQPEIM.[E]	VLPVPQPEIM		P05814	P05814 [90-99]	1122.62	42.96	2.08744e+07	4.53517e+06
[Q].DKIYPSFQPQPL.[I]	DKIYPSFQPQPL		P05814	P05814 [53-64]	1432.75	36.75	2.07837e+07	4.12881e+06
[R].WLQGSQELPR.[E]	WLQGSQELPR		P01876; P01877	P01876 [264-273]	1213.63	23.57	2.02988e+07	1.74217e+07
[A].VVLPVPQPEIMEVPK.[A]	VVLPVPQPEIMEVPK	1xOxidation [M11]	P05814	P05814 [89-103]	1690.94	39.02	2.01219e+07	5.08884e+06
[V].LPVPQPEIM.[E]	LPVPQPEIM	1xOxidation [M9]	P05814	P05814 [91-99]	1039.55	28.06	1.96536e+07	1.89679e+06
[F].LSTGDANLPGN.[Y]	LSTGDANLPGN		P19835	P19835 [171-181]	1058.51	19.05	1.9527e+07	2.29317e+06
[A].LENPQPHPGWQGT.[L]	LENPQPHPGWQGT		P19835	P19835 [62-74]	1460.69	19.46	1.89279e+07	2.91352e+06
[Y].PFVEPIP.[Y]	PFVEPIP		P05814	P05814 [67-73]	798.44	35.54	1.82311e+07	4.35361e+06
[V].LPVPQPEIMEVPK.[A]	LPVPQPEIMEVPK	1xOxidation [M9]	P05814	P05814 [91-103]	1492.81	29.07	1.81887e+07	3.80643e+06
[L].MQQVPQPI.[P]	MQQVPQPI	1xOxidation [M1]	P05814	P05814 [150-157]	956.487	20.35	1.81881e+07	4.16929e+06
[L].QNPSESSEPIPL.[E]	QNPSESSEPIPL	1xPhospho [S]	P47710	P47710 [28-39]	1377.59	33.37	1.7551e+07	3.13042e+06
[V].VLPVPQPE.[I]	VLPVPQPE		P05814	P05814 [90-97]	878.498	23.84	1.73395e+07	4.56517e+06
[R].SVNGKEDAIWN.[L]	SVNGKEDAIWN		P02788	P02788 [278-288]	1232.59	20.72	1.71828e+07	5.29175e+06
[L].MQQVPQPIPQ.[T]	MQQVPQPIPQ		P05814	P05814 [150-159]	1165.6	22.34	1.65361e+07	2.10228e+06
[M].QYVPFPPFSD.[I]	QYVPFPPFSD		P47710	P47710 [157-166]	1196.56	45.61	1.6314e+07	2.89459e+06
[F].IFPPSDEQ.[L]	IFPPSDEQ		P01834	P01834 [9-16]	932.436	19.12	1.61743e+07	7.44988e+06
[H].SDGQLQEGSPI.[Q]	SDGQLQEGSPI		P01833	P01833 [329-339]	1130.53	21.15	1.60981e+07	9.55556e+06
[Q].PLMQQVPQPI.[P]	PLMQQVPQPI	1xOxidation [M3]	P05814	P05814 [148-157]	1166.62	25.39	1.5649e+07	2.83883e+06
[E].DLSDEAERDEYE.[L]	DLSDEAERDEYE		P02788	P02788 [236-247]	1470.59	19.28	1.5278e+07	9.2534e+06
[F].LPQNILP.[L]	LPQNILP		P05814	P05814 [77-83]	794.477	35.35	1.51581e+07	1.10208e+07
[K].SPIFGPEEV.[N]	SPIFGPEEV		P01833	P01833 [20-28]	974.483	35.54	1.47249e+07	1.11937e+07
[Y].VPFPPFSDISNPT.[A]	VPFPPFSDISNPT		P47710	P47710 [159-171]	1417.7	45.36	1.44401e+07	4.05541e+06
[A].VVLPVPQPEIME.[V]	VVLPVPQPEIME	1xOxidation [M11]	P05814	P05814 [89-100]	1366.73	40.63	1.44144e+07	3.04161e+06
[I].YPSFQPQPL.[I]	YPSFQPQPL		P05814	P05814 [56-64]	1076.54	35.99	1.40944e+07	3.65774e+06
[E].VDETYVPK.[E]	VDETYVPK		P02768	P02768 [517-524]	950.483	16.07	1.39962e+07	4.61572e+06
[I].YPVTQPL.[A]	YPVTQPL		P05814	P05814 [211-217]	817.445	24.06	1.39343e+07	2.6832e+06
[R].IRLDIQGTGQL.[L]	IRLDIQGTGQL		P01833	P01833 [191-201]	1213.69	33.61	1.39216e+07	1.52798e+06
[F].IYEAGLAP.[Y]	IYEAGLAP		P02788	P02788 [83-90]	833.44	23.98	1.38303e+07	2.44847e+06
[M].QYVPFPPFSDISNPT.[A]	QYVPFPPFSDISNPT		P47710	P47710 [157-171]	1708.82	46.43	1.37873e+07	2.72334e+06
[Y].VTSAPMPEPQAPG.[R]	VTSAPMPEPQAPG		P01871	P01871 [378-390]	1281.61	20.6	1.37379e+07	9.00735e+06
[F].LPQNILPL.[A]	LPQNILPL		P05814	P05814 [77-84]	907.561	45.32	1.37338e+07	3.16941e+06
[L].MQQVPQPI.[P]	MQQVPQPI		P05814	P05814 [150-157]	940.492	23.24	1.34088e+07	3.60162e+06
[W].KVDNALQSGNSQESVTEQDSKDSTY.[S]	KVDNALQSGNSQESVTEQDSKDSTY		P01834	P01834 [41-65]	2730.23	18.06	1.32898e+07	2.35947e+06
[L].EVDETYVPKE.[F]	EVDETYVPKE		P02768	P02768 [516-525]	1208.57	18.29	1.32723e+07	4.63532e+06
[L].DIQGTGQL.[L]	DIQGTGQL		P01833	P01833 [194-201]	831.421	19.59	1.32152e+07	2.0126e+06
[V].VLPVPQPEI.[M]	VLPVPQPEI		P05814	P05814 [90-98]	991.582	38.72	1.3163e+07	2.61153e+06
[L].MQQVPQPIPQT.[L]	MQQVPQPIPQT		P05814	P05814 [150-160]	1266.65	22.91	1.311e+07	2.68449e+06
[K].IYPSFQPQP.[L]	IYPSFQPQP		P05814	P05814 [55-63]	1076.54	28.67	1.29207e+07	2.9965e+06
[L].ALNELVTLT.[C]	ALNELVTLT		P01876; P01877	P01876 [241-249]	973.556	41.22	1.27057e+07	9.09031e+06
[T].WLNPDPSQ.[K]	WLNPDPSQ		P10451	P10451 [43-50]	956.447	22.71	1.26387e+07	2.13086e+06
[H].TSDSDVPSGVTE.[V]	TSDSDVPSGVTE		P10909	P10909 [393-404]	1193.52	17.38	1.16024e+07	2.07302e+06
[W].KVDNALQSGNSQESVTEQDSK.[D]	KVDNALQSGNSQESVTEQDSK		P01834	P01834 [41-61]	2264.06	15.16	1.15501e+07	4.97629e+06
[F].RISHELDSASSEVN.[-]	RISHELDSASSEVN	2xPhospho [S]	P10451	P10451 [301-314]	1703.67	17.96	1.13403e+07	3.83998e+06
[T].KSPIFGPEE.[V]	KSPIFGPEE		P01833	P01833 [19-27]	1003.51	21.11	1.12159e+07	1.65749e+06
[R].SSEDPNEDIVERNI.[R]	SSEDPNEDIVERNI		P01591	P01591 [47-60]	1616.74	23.95	1.11385e+07	8.95402e+06
[V].YEDLRGSVT.[F]	YEDLRGSVT		P01833	P01833 [246-254]	1039.51	17.17	1.10645e+07	8.60857e+06
[L].PVPQPEIM.[E]	PVPQPEIM	1xOxidation [M8]	P05814	P05814 [92-99]	926.465	19.97	1.09487e+07	1.46785e+06
[Q].FRVPGDQTST.[I]	FRVPGDQTST		P24821	P24821 [668-677]	1107.54	18.58	1.0808e+07	1.66144e+06
[K].VKHEDQQQGEDEHQDKIYPSFQPQPL.[I]	VKHEDQQQGEDEHQDKIYPSFQPQPL		P05814	P05814 [39-64]	3120.47	27.41	1.07906e+07	4.30326e+06
[F].VNEESTIPRSPTVV.[K]	VNEESTIPRSPTVV		P01833	P01833 [346-359]	1527.8	22.99	1.06934e+07	7.74492e+06
[K].NADLQVLKPEPELV.[Y]	NADLQVLKPEPELV		P01833	P01833 [232-245]	1564.86	40.1	1.06723e+07	9.32032e+06
[R].WLQGSQELPREK.[Y]	WLQGSQELPREK		P01876; P01877	P01876 [264-275]	1470.77	20.02	1.06229e+07	1.02261e+07
[Q].VPQPIPQ.[T]	VPQPIPQ		P05814	P05814 [153-159]	778.446	18.35	1.06081e+07	2.01725e+06
[Y].PFVEPIPYG.[F]	PFVEPIPYG		P05814	P05814 [67-75]	1018.52	39.82	1.0515e+07	2.40022e+06
[K].VDNALQSGNSQESVTEQDSKDST.[Y]	VDNALQSGNSQESVTEQDSKDST		P01834	P01834 [42-64]	2439.08	16.87	1.04313e+07	5.61793e+06
[H].QDKIYPSFQPQPL.[I]	QDKIYPSFQPQPL		P05814	P05814 [52-64]	1560.81	36.3	1.03851e+07	2.47208e+06
[N].SHVQVPF.[Q]	SHVQVPF		P47710	P47710 [130-136]	813.425	24.63	1.02594e+07	1.60795e+06
[F].GSPSGQKDLLFKDSAIG.[F]	GSPSGQKDLLFKDSAIG		P02788	P02788 [309-325]	1719.89	27.16	1.01895e+07	7.42787e+06
[Q].PAVVLPVPQPEIM.[E]	PAVVLPVPQPEIM	1xOxidation [M13]	P05814	P05814 [87-99]	1405.78	43.61	1.0128e+07	2.02709e+06
[L].FVNEESTIPR.[S]	FVNEESTIPR		P01833	P01833 [345-354]	1191.6	19.26	1.00549e+07	8.51416e+06
[L].VYESVDGTVKE.[V]	VYESVDGTVKE		P24821	P24821 [1920-1930]	1225.59	16.73	1.00478e+07	1.48954e+06
[L].NELQGL.[K]	NELQGL		P02788	P02788 [126-131]	673.352	22.69	9.99667e+06	1.71556e+06
[L].LKDIDGY.[G]	LKDIDGY		P00709	P00709 [31-37]	823.42	18.37	9.91214e+06	2.32214e+06
[T].ASTSQEL.[H]	ASTSQEL	1xAcetyl [N-Term]; 1xPhospho [S4]	P14207	P14207 [62-68]	857.329	14.48	9.83221e+06	1.07927e+06
[L].ENLHLPL.[P]	ENLHLPL		P05814	P05814 [137-143]	835.467	34.9	9.73323e+06	1.24926e+06
[P].SFQPQPL.[I]	SFQPQPL		P05814	P05814 [58-64]	816.425	24.81	9.63415e+06	2.73777e+06
[R].ILLNPQDKDGSF.[S]	ILLNPQDKDGSF		P01833	P01833 [297-308]	1346.7	28.6	9.59529e+06	5.11662e+06
[Q].PLMQQVPQPIPQ.[T]	PLMQQVPQPIPQ	1xOxidation [M3]	P05814	P05814 [148-159]	1391.74	24.05	9.5689e+06	2.38672e+06
[V].FDTGSSNLW.[V]	FDTGSSNLW		P07339	P07339 [96-104]	1026.45	36.55	9.48403e+06	1.75136e+06
[IV].SDFYPGAVT.[V]	SDFYPGAVT		P0CG05; P0CG04	P0CG05 [31-39]	956.436	25.45	9.4818e+06	7.10454e+06
[K].VKHEDQQQGEDEHQDKIYPS.[F]	VKHEDQQQGEDEHQDKIYPS		P05814	P05814 [39-58]	2410.09	9.28	9.35344e+06	1.88514e+06
[F].SISNSAEDPFIAIHAES.[K]	SISNSAEDPFIAIHAES		P04745	P04745 [493-509]	1787.84	37.91	9.31997e+06	680044
[F].IYEAGLAPY.[K]	IYEAGLAPY		P02788	P02788 [83-91]	996.504	29.47	9.22701e+06	1.74134e+06
[L].LLNPTHQIYPV.[T]	LLNPTHQIYPV		P05814	P05814 [203-213]	1294.72	31.62	9.21753e+06	4.82147e+06
[Q].GEDEHQDKIYPSFQPQPL.[I]	GEDEHQDKIYPSFQPQPL		P05814	P05814 [47-64]	2128	33.28	9.08938e+06	2.50644e+06
[R].MNENSHVQVPF.[Q]	MNENSHVQVPF		P47710	P47710 [126-136]	1301.59	27.99	9.03783e+06	3.82497e+06
[W].LQGSQELPRE.[K]	LQGSQELPRE		P01876; P01877	P01876 [265-274]	1156.6	17.1	8.76523e+06	4.21311e+06
[V].ESGGGLVQPGGSL.[R]	ESGGGLVQPGGSL		P01766	P01766 [6-18]	1157.58	25.61	8.75535e+06	5.06001e+06
[Q].PLMQQVPQPIPQ.[T]	PLMQQVPQPIPQ		P05814	P05814 [148-159]	1375.74	32.17	8.62586e+06	2.33013e+06
[K].TGDPNMGDSAVPT.[H]	TGDPNMGDSAVPT		P19835	P19835 [494-506]	1261.54	19.22	8.61894e+06	861115
[K].VKHEDQQQGEDEHQDKIYPSFQPQP.[L]	VKHEDQQQGEDEHQDKIYPSFQPQP		P05814	P05814 [39-63]	3007.38	20.83	8.5927e+06	6.50605e+06
[S].NLWVPS.[I]	NLWVPS		P07339	P07339 [102-107]	715.377	32.23	8.58661e+06	1.3035e+06
[A].INNPYVP.[R]	INNPYVP		P07498	P07498 [71-77]	816.425	23.57	8.45471e+06	1.42156e+06
[L].PVPQPEIMEVPK.[A]	PVPQPEIMEVPK	1xOxidation [M8]	P05814	P05814 [92-103]	1379.72	21.76	8.40837e+06	1.4385e+06
[M].QYVPFPP.[F]	QYVPFPP		P47710	P47710 [157-163]	847.435	36.14	8.33338e+06	1.53786e+06
[L].ISDFYPGAVT.[V]	ISDFYPGAVT		P0CG05; P0CG04	P0CG05 [30-39]	1069.52	30.98	8.24377e+06	2.59978e+06
[R].ILLNPQ.[D]	ILLNPQ		P01833	P01833 [297-302]	697.424	21.94	8.23117e+06	2.41763e+06
[S].APFDVIGPPEPI.[L]	APFDVIGPPEPI		Q13410	Q13410 [27-38]	1251.66	45.48	8.1999e+06	1.39057e+06
[Y].SIGNLKPDTEYEVS.[L]	SIGNLKPDTEYEVS		P24821	P24821 [859-872]	1551.75	23.69	8.14114e+06	4.03896e+06
[R].ILLNPQDK.[D]	ILLNPQDK		P01833	P01833 [297-304]	940.546	18.86	7.95507e+06	1.85425e+06
[Q].DSIDSNDSDDVDDTDDSHQSDESHH.[S]	DSIDSNDSDDVDDTDDSHQSDESHH		P10451	P10451 [101-125]	2787	9.26	7.90646e+06	3.53978e+06
[W].QLFVNEESTIPR.[S]	QLFVNEESTIPR		P01833	P01833 [343-354]	1432.74	28.34	7.60551e+06	6.43943e+06
[W].KVDNALQSGNSQESVTEQ.[D]	KVDNALQSGNSQESVTEQ		P01834	P01834 [41-58]	1933.91	16.39	7.54251e+06	5.913e+06
[V].LPVPQPEIME.[V]	LPVPQPEIME	1xOxidation [M9]	P05814	P05814 [91-100]	1168.59	29.01	7.45181e+06	1.29708e+06
[F].SISNSAEDPF.[I]	SISNSAEDPF		P04745	P04745 [493-502]	1066.47	26.38	7.34685e+06	269634
[G].DQTVSDNEL.[Q]	DQTVSDNEL		P10909	P10909 [23-31]	1020.45	18.93	7.32495e+06	987610
[Q].GEDEHQDKIYPSFQPQP.[L]	GEDEHQDKIYPSFQPQP		P05814	P05814 [47-63]	2014.91	24.05	7.19819e+06	5.16647e+06
[K].IYPSFQPQ.[P]	IYPSFQPQ		P05814	P05814 [55-62]	979.488	25.89	7.13455e+06	1.35756e+06
[M].NENSHVQVPF.[Q]	NENSHVQVPF		P47710	P47710 [127-136]	1170.55	25.33	7.1327e+06	4.17494e+06
[R].TSIVHL.[F]	TSIVHL		P04745	P04745 [26-31]	669.393	22.36	7.12088e+06	603280
[K].IIEGEPNL.[K]	IIEGEPNL		P01833	P01833 [457-464]	884.472	24.87	7.06423e+06	2.34363e+06
[L].LVDSEGWV.[K]	LVDSEGWV		P01833	P01833 [398-405]	904.441	32.12	7.04191e+06	4.395e+06
[S].ALLQDNIADAV.[A]	ALLQDNIADAV		P61626	P61626 [101-111]	1142.61	40.19	6.95534e+06	1.38671e+06
[R].SGNEDEFRNMVT.[R]	SGNEDEFRNMVT		P04745	P04745 [88-99]	1398.6	23.3	6.9023e+06	900264
[T].VTHTDLPSPL.[K]	VTHTDLPSPL		P01871	P01871 [305-314]	1079.57	27.85	6.83515e+06	5.14722e+06
[S].GNTFRPEV.[H]	GNTFRPEV		P01876; P01877	P01876 [223-230]	919.463	19.23	6.82644e+06	4.41346e+06
[Q].QVVPYP.[Q]	QVVPYP		P05814	P05814 [182-187]	702.382	23.41	6.70565e+06	3.53146e+06
[L].QPLMQQVPQPIPQT.[L]	QPLMQQVPQPIPQT	1xOxidation [M4]	P05814	P05814 [147-160]	1620.84	25.31	6.59503e+06	1.84599e+06
[K].MLFVEPI.[L]	MLFVEPI	1xOxidation [M1]	P05155	P05155 [53-59]	864.454	42.72	6.48887e+06	5.08862e+06
[W].TGPPEPIEA.[A]	TGPPEPIEA		P02788	P02788 [158-166]	910.452	20.34	6.46032e+06	1.86796e+06
[L].KNWGEGW.[G]	KNWGEGW		P04745	P04745 [293-299]	876.4	24.4	6.43524e+06	677545
[T].KSPIFGPEEVNSVEGNSV.[S]	KSPIFGPEEVNSVEGNSV		P01833	P01833 [19-36]	1888.93	32.6	6.38872e+06	5.50334e+06
[P].FVEPIPY.[G]	FVEPIPY		P05814	P05814 [68-74]	864.45	37.79	6.3387e+06	1.62185e+06
[F].FLPDEGKLQ.[H]	FLPDEGKLQ		P01009	P01009 [277-285]	1046.55	21.37	6.29701e+06	1.10882e+06
[Y].TPTHEGGLEM.[Q]	TPTHEGGLEM		P24821	P24821 [657-666]	1071.48	18.54	6.21354e+06	2.30754e+06
[R].EFHSHEFHSHEDM.[L]	EFHSHEFHSHEDM	2xPhospho [S4; S9]	P10451	P10451 [272-284]	1828.58	16.04	6.18919e+06	2.36174e+06
[R].TTIDLTEDENQ.[Y]	TTIDLTEDENQ		P24821	P24821 [847-857]	1278.57	21.38	6.15913e+06	2.7938e+06
[D].VTLDPDTAHPHL.[F]	VTLDPDTAHPHL		Q13410	Q13410 [305-316]	1315.66	22.69	6.09915e+06	1.01487e+06
[R].LQNPSESSEPI.[P]	LQNPSESSEPI	1xPhospho [S7]	P47710	P47710 [27-37]	1280.54	21.53	6.06786e+06	1.7951e+06
[Y].SIGNLKPDTE.[Y]	SIGNLKPDTE		P24821	P24821 [859-868]	1073.55	17.72	5.96628e+06	1.27399e+06
[D].LENLHLPLP.[L]	LENLHLPLP		P05814	P05814 [136-144]	1045.6	44.01	5.89158e+06	1.84467e+06
[E].QNLSDLQ.[L]	QNLSDLQ		Q13077	Q13077 [143-149]	817.405	19.57	5.83345e+06	690497
[Y].SIGNLKPDTEYEV.[S]	SIGNLKPDTEYEV		P24821	P24821 [859-871]	1464.72	27.36	5.76948e+06	2.85692e+06
[F].SISNSAEDPFIAIH.[A]	SISNSAEDPFIAIH		P04745	P04745 [493-506]	1500.73	36.3	5.75713e+06	320391
[E].DLSDEAERDEY.[E]	DLSDEAERDEY		P02788	P02788 [236-246]	1341.54	19.23	5.74403e+06	5.32667e+06
[L].QVLKPEPELV.[Y]	QVLKPEPELV		P01833	P01833 [236-245]	1151.67	26.32	5.71614e+06	988869
[R].ILLNPQDKDG.[S]	ILLNPQDKDG		P01833	P01833 [297-306]	1112.59	19.01	5.67702e+06	1.7613e+06
[F].SVVITGLRKEDAG.[R]	SVVITGLRKEDAG		P01833	P01833 [309-321]	1344.75	18.98	5.61956e+06	3.7187e+06
[N].VTDPSLDL.[T]	VTDPSLDL		P22079	P22079 [107-114]	859.441	38.83	5.55594e+06	1.01259e+06
[T].KSPIFGPEEVNSVEGN.[S]	KSPIFGPEEVNSVEGN		P01833	P01833 [19-34]	1702.83	27.57	5.55193e+06	2.02471e+06
[-].DIQMTQSPSSL.[S]	DIQMTQSPSSL		P01593	P01593 [1-11]	1206.57	26.48	5.52644e+06	2.56157e+06
[L].QPLMQQVPQPIPQ.[T]	QPLMQQVPQPIPQ	1xOxidation [M4]	P05814	P05814 [147-159]	1519.79	24.74	5.48306e+06	1.42684e+06
[E].VVTEDLPQLGDL.[A]	VVTEDLPQLGDL		P24821	P24821 [1342-1353]	1298.68	45.12	5.45922e+06	1.92293e+06
[L].LKDIDGYGG.[I]	LKDIDGYGG		P00709	P00709 [31-39]	937.463	17.87	5.45865e+06	1.22174e+06
[F].DFIHDVN.[K]	DFIHDVN		Q08431	Q08431 [170-176]	859.394	21.35	5.44543e+06	772762
[E].NSHVQVPFQ.[Q]	NSHVQVPFQ		P47710	P47710 [129-137]	1055.53	20.85	5.42989e+06	971009
[F].VPVIDGDFIPADPI.[N]	VPVIDGDFIPADPI		P19835	P19835 [308-321]	1467.77	46.47	5.3321e+06	1.10076e+06
[R].LDIQGTGQL.[L]	LDIQGTGQL		P01833	P01833 [193-201]	944.505	27.5	5.3312e+06	3.17156e+06
[F].VEPIPYG.[F]	VEPIPYG		P05814	P05814 [69-75]	774.403	23.5	5.33056e+06	643398
[K].SPIFGPEEVN.[S]	SPIFGPEEVN		P01833	P01833 [20-29]	1088.53	29.11	5.30076e+06	1.9257e+06
[N].PSESSEPIPL.[E]	PSESSEPIPL	1xPhospho [S]	P47710	P47710 [30-39]	1135.49	34.05	5.29301e+06	1.11172e+06
[Q].GFFPQEPL.[S]	GFFPQEPL		P01876; P01877	P01876 [30-37]	934.467	44.36	5.27696e+06	2.55281e+06
[E].DLSDEAERDE.[Y]	DLSDEAERDE		P02788	P02788 [236-245]	1178.48	15.19	5.27101e+06	4.60894e+06
[R].SVNGKEDAIW.[N]	SVNGKEDAIW		P02788	P02788 [278-287]	1118.55	23.78	5.25996e+06	812870
[F].LDDDITD.[D]	LDDDITD		P00709	P00709 [100-106]	806.341	17.69	5.25782e+06	745901
[F].IFPPSDEQL.[K]	IFPPSDEQL		P01834	P01834 [9-17]	1045.52	31.82	5.24776e+06	3.37095e+06
[D].LENLHLPLPL.[L]	LENLHLPLPL		P05814	P05814 [136-145]	1158.69	46.42	5.23492e+06	1.7139e+06
[L].FILPDQDKMEE.[V]	FILPDQDKMEE		P01011	P01011 [276-286]	1364.64	30.05	5.2296e+06	2.01032e+06
[K].ALENPQPHPGWQGT.[L]	ALENPQPHPGWQGT		P19835	P19835 [61-74]	1531.73	20.2	5.17581e+06	1.5998e+06
[V].HLLPPPSEE.[L]	HLLPPPSEE		P01876; P01877	P01876 [231-239]	1018.52	19.25	5.10109e+06	1.52117e+06
[Y].VTSAPMPEPQAPG.[R]	VTSAPMPEPQAPG	1xOxidation [M6]	P01871	P01871 [378-390]	1297.61	16.7	5.05501e+06	4.00174e+06
[H].QIYPVTQPL.[A]	QIYPVTQPL		P05814	P05814 [209-217]	1058.59	33.04	5.01444e+06	1.09238e+06
[Q].PEIMEVPK.[A]	PEIMEVPK		P05814	P05814 [96-103]	942.496	21.32	5.00985e+06	4.89283e+06
[E].NLHLPLP.[L]	NLHLPLP		P05814	P05814 [138-144]	803.477	40.03	5.00649e+06	776508
[E].VIVGPDTTS.[Y]	VIVGPDTTS		P24821	P24821 [1931-1939]	888.467	17.64	4.99756e+06	615048
[Q].PAVVLPVPQPEIMEVPK.[A]	PAVVLPVPQPEIMEVPK	1xOxidation [M13]	P05814	P05814 [87-103]	1859.03	42.76	4.95856e+06	1.60974e+06
[-].EIVLTQSPGT.[L]	EIVLTQSPGT		P01620	P01620 [1-10]	1044.56	22.34	4.90901e+06	3.51268e+06
[L].QPLMQQVPQPI.[P]	QPLMQQVPQPI	1xOxidation [M4]	P05814	P05814 [147-157]	1294.68	26.31	4.82823e+06	1.07787e+06
[F].TTALDGPSGL.[V]	TTALDGPSGL		P24821	P24821 [1796-1805]	931.473	25.43	4.82408e+06	1.18616e+06
[L].SLDSTPQDGNVVVA.[C]	SLDSTPQDGNVVVA		P01877	P01877 [12-25]	1401.69	22.81	4.81842e+06	1.77943e+06
[Y].QVSLNSGSHF.[C]	QVSLNSGSHF		Q8NHM4	Q8NHM4 [38-47]	1075.52	20.36	4.81258e+06	567139
[W].NVPIGTLRP.[F]	NVPIGTLRP		P02788	P02788 [145-153]	966.573	24.13	4.78887e+06	1.47848e+06
[M].DHTFFPG.[Y]	DHTFFPG		P47989	P47989 [386-392]	820.362	25.4	4.74284e+06	649883
[Y].VPFPPFSD.[I]	VPFPPFSD		P47710	P47710 [159-166]	905.44	43.37	4.69124e+06	657687
[K].DLAPPSEPSES.[F]	DLAPPSEPSES		P24821	P24821 [76-86]	1128.51	18.86	4.68939e+06	875038
[L].GLQHWVPE.[L]	GLQHWVPE		Q08431	Q08431 [97-104]	965.484	24.34	4.68284e+06	879505
[Y].DIAQDAPDGL.[A]	DIAQDAPDGL		P23280	P23280 [150-159]	1014.47	26.94	4.65889e+06	1.02138e+06
[L].NPTHQIYPVTQPL.[A]	NPTHQIYPVTQPL		P05814	P05814 [205-217]	1507.79	28.38	4.63307e+06	1.44367e+06
[T].LFPPSSEEL.[Q]	LFPPSSEEL		P0CG05; P0CG04	P0CG05 [11-19]	1018.51	35.5	4.62359e+06	2.87784e+06
[N].PSESSEPIPL.[E]	PSESSEPIPL		P47710	P47710 [30-39]	1055.53	29.85	4.59301e+06	1.17982e+06
[L].DIQGTGQLL.[F]	DIQGTGQLL		P01833	P01833 [194-202]	944.505	30.35	4.55684e+06	1.08587e+06
[W].KVDNALQSGNSQESVTEQDSKDSTYSLSST.[L]	KVDNALQSGNSQESVTEQDSKDSTYSLSST		P01834	P01834 [41-70]	3205.46	20.9	4.55494e+06	3.97069e+06
[H].MESEELNGA.[Y]	MESEELNGA	1xPhospho [S3]	P10451	P10451 [193-201]	1059.37	18.71	4.53786e+06	1.30514e+06
[F].IFPPSDEQLKSGTASVV.[C]	IFPPSDEQLKSGTASVV		P01834	P01834 [9-25]	1774.92	31.85	4.52028e+06	3.3081e+06
[K].SVIPSDGPSVA.[C]	SVIPSDGPSVA		P02787	P02787 [47-57]	1028.53	22.91	4.45607e+06	1.76739e+06
[IV].SDFYPGAVTVA.[W]	SDFYPGAVTVA		P0CG05; P0CG04	P0CG05 [31-41]	1126.54	33.29	4.42257e+06	3.69457e+06
[K].YAPISGGDHAEVDVPK.[S]	YAPISGGDHAEVDVPK		P24821	P24821 [927-942]	1654.81	20.12	4.42105e+06	1.97245e+06
[V].TWSESGQGVTA.[R]	TWSESGQGVTA		P01876	P01876 [40-50]	1122.51	19.28	4.40823e+06	2.38786e+06
[F].LDDDITDD.[I]	LDDDITDD		P00709	P00709 [100-107]	921.368	18.58	4.39322e+06	822767
[Q].PAVVLPVPQPEIME.[V]	PAVVLPVPQPEIME	1xOxidation [M13]	P05814	P05814 [87-100]	1534.82	43.64	4.37176e+06	1.05448e+06
[R].WLQGSQE.[L]	WLQGSQE		P01876; P01877	P01876 [264-270]	847.394	17.48	4.36771e+06	3.82663e+06
[Q].AIVENNESTEY.[G]	AIVENNESTEY		P00709	P00709 [59-69]	1268.56	18.97	4.3386e+06	980234
[A].SHTSDSDVPSGVTE.[V]	SHTSDSDVPSGVTE		P10909	P10909 [391-404]	1417.61	15.49	4.3231e+06	682051
[R].LDIQGTGQ.[L]	LDIQGTGQ		P01833	P01833 [193-200]	831.421	17.15	4.31086e+06	2.88524e+06
[L].FILPDQDK.[M]	FILPDQDK		P01011	P01011 [276-283]	975.515	23.15	4.28058e+06	1.70321e+06
[IV].SDFYPGAVTV.[A]	SDFYPGAVTV		P0CG05; P0CG04	P0CG05 [31-40]	1055.5	35.8	4.27942e+06	3.23106e+06
[Q].FRVPGDQT.[S]	FRVPGDQT		P24821	P24821 [668-675]	919.463	18.29	4.25722e+06	674874
[T].WLNPDPSQKQ.[N]	WLNPDPSQKQ		P10451	P10451 [43-52]	1212.6	19.54	4.23613e+06	905162
[T].KSPIFGPEEVNSVEGNSVSIT.[C]	KSPIFGPEEVNSVEGNSVSIT		P01833	P01833 [19-39]	2190.09	38.14	4.23264e+06	3.15795e+06
[V].QGFFPQEPL.[S]	QGFFPQEPL		P01876; P01877	P01876 [29-37]	1062.53	44.27	4.2208e+06	2.97544e+06
[T].WSESGQGVTA.[R]	WSESGQGVTA		P01876	P01876 [41-50]	1021.46	18.34	4.21034e+06	2.47357e+06
[Y].IAGTNNMDGHI.[F]	IAGTNNMDGHI		P19835	P19835 [333-343]	1142.53	18.68	4.18931e+06	806505
[I].YEAGLAPY.[K]	YEAGLAPY		P02788	P02788 [84-91]	883.42	24.32	4.17851e+06	842069
[K].QVGSGVTTDQV.[Q]	QVGSGVTTDQV		P01871	P01871 [154-164]	1090.54	18.01	4.15976e+06	2.77447e+06
[V].THTDLPSPL.[K]	THTDLPSPL		P01871	P01871 [306-314]	980.505	26.53	4.10935e+06	3.11348e+06
[K].FTTDLDSPR.[D]	FTTDLDSPR		P24821	P24821 [1883-1891]	1051.51	19.16	4.09886e+06	2.02376e+06
[D].LNAPSDWDSR.[G]	LNAPSDWDSR	1xPhospho [S9]	P10451	P10451 [211-220]	1240.5	20.63	4.06207e+06	1.08864e+06
[R].NVVDGQPF.[T]	NVVDGQPF		P04745	P04745 [414-421]	875.426	25.99	3.98916e+06	652436
[-].EVQLVESGGGLVQPGGSL.[R]	EVQLVESGGGLVQPGGSL		P01766	P01766 [1-18]	1725.9	42.27	3.9668e+06	2.40574e+06
[R].RPDIQYPDATDEDITSH.[M]	RPDIQYPDATDEDITSH	1xPhospho [T/S]	P10451	P10451 [176-192]	2052.85	22.96	3.95277e+06	935190
[Y].RQTGLAPGQEYE.[I]	RQTGLAPGQEYE		P24821	P24821 [769-780]	1348.65	16.99	3.91808e+06	637452
[W].TGPPEPIEAA.[V]	TGPPEPIEAA		P02788	P02788 [158-167]	981.489	20.76	3.90666e+06	1.58321e+06
[F].SISNSAEDPFIA.[I]	SISNSAEDPFIA		P04745	P04745 [493-504]	1250.59	33.37	3.87509e+06	456379
[Y].SPGESWHP.[Y]	SPGESWHP		Q6WN34	Q6WN34 [41-48]	896.39	17.88	3.85791e+06	819066
[K].SNESHDHMDDMDDEDDDDHVDSQ.[D]	SNESHDHMDDMDDEDDDDHVDSQ		P10451	P10451 [78-100]	2702.9	15.44	3.81708e+06	1.37456e+06
[E].SLSSSEESITE.[Y]	SLSSSEESITE	1xPhospho [S]	P05814	P05814 [21-31]	1248.49	22.02	3.81091e+06	1.56797e+06
[A].IVENNESTE.[Y]	IVENNESTE		P00709	P00709 [60-68]	1034.46	8.2	3.79995e+06	577063
[Q].AIVENNESTEYG.[L]	AIVENNESTEYG		P00709	P00709 [59-70]	1325.59	18.28	3.79399e+06	660120
[C].LVQGFFPQEPL.[S]	LVQGFFPQEPL		P01876; P01877	P01876 [27-37]	1274.68	45.81	3.77656e+06	2.44257e+06
[K].AAPSVTLFPPSSEELQANKATLV.[C]	AAPSVTLFPPSSEELQANKATLV		P0CG05	P0CG05 [5-27]	2370.26	44.49	3.716e+06	3.36507e+06
[K].VDNALQSGNSQESVTEQDSK.[D]	VDNALQSGNSQESVTEQDSK		P01834	P01834 [42-61]	2135.97	16.24	3.69082e+06	1.89029e+06
[IV].SDFYPGAV.[T]	SDFYPGAV		P0CG05; P0CG04	P0CG05 [31-38]	855.388	27.62	3.6588e+06	2.57537e+06
[L].LQDNIADAV.[A]	LQDNIADAV		P61626	P61626 [103-111]	958.484	25.78	3.63588e+06	1.43816e+06
[L].FETPVEAQ.[Y]	FETPVEAQ		Q08431	Q08431 [196-203]	920.436	20.32	3.61733e+06	667139
[V].VAVPPQDTAPY.[S]	VAVPPQDTAPY		P25311	P25311 [268-278]	1157.58	21.25	3.58716e+06	1.85384e+06
[L].LNNFYPR.[E]	LNNFYPR		P01834	P01834 [28-34]	923.473	19.39	3.57548e+06	1.61719e+06
[K].AAPSVTLFPPSSEELQANKA.[T]	AAPSVTLFPPSSEELQANKA		P0CG05	P0CG05 [5-24]	2057.05	39.66	3.55652e+06	3.14607e+06
[I].KIIEGEPNL.[K]	KIIEGEPNL		P01833	P01833 [456-464]	1012.57	22.39	3.54115e+06	1.0498e+06
[E].AIVDTGTSL.[M]	AIVDTGTSL		P07339	P07339 [292-300]	876.467	24.74	3.50907e+06	418309
[A].TWLNPDPSQ.[K]	TWLNPDPSQ		P10451	P10451 [42-50]	1057.49	27.09	3.49364e+06	637130
[L].QNPSESSEPIPL.[E]	QNPSESSEPIPL		P47710	P47710 [28-39]	1297.63	29.84	3.47875e+06	1.01375e+06
[W].KVDNALQSGNSQESVTEQDSKDSTYSLSSTL.[T]	KVDNALQSGNSQESVTEQDSKDSTYSLSSTL		P01834	P01834 [41-71]	3318.55	29.53	3.45626e+06	1.89391e+06
[-].DIQMTQSPS.[S]	DIQMTQSPS		P01593	P01593 [1-9]	1006.45	17.24	3.4458e+06	1.81506e+06
[-].EIVLTQSPGTL.[S]	EIVLTQSPGTL		P01620	P01620 [1-11]	1157.64	34.72	3.42797e+06	1.10188e+06
[T].KSPIFGPEEVNSV.[E]	KSPIFGPEEVNSV		P01833	P01833 [19-31]	1402.72	30.24	3.41424e+06	1.80629e+06
[R].IIRSSEDPNEDIVERNI.[R]	IIRSSEDPNEDIVERNI		P01591	P01591 [44-60]	1999.01	23.82	3.36472e+06	2.65705e+06
[K].VKHEDQQQGEDEHQDKIYPSF.[Q]	VKHEDQQQGEDEHQDKIYPSF		P05814	P05814 [39-59]	2557.16	20.26	3.35958e+06	1.56052e+06
[L].DGGFIYEAGLAPY.[K]	DGGFIYEAGLAPY		P02788	P02788 [79-91]	1372.64	45.18	3.33473e+06	653861
[L].VESGGGLVQPGGSL.[R]	VESGGGLVQPGGSL		P01766	P01766 [5-18]	1256.65	26.82	3.26355e+06	1.64049e+06
[L].IPTQPSQGAP.[-]	IPTQPSQGAP		Q13410	Q13410 [517-526]	995.516	16.16	3.25987e+06	677108
[R].IIRSSEDPNEDIVER.[N]	IIRSSEDPNEDIVER		P01591	P01591 [44-58]	1771.88	18.11	3.25682e+06	1.72739e+06
[Y].APISGGDHAEVDVPK.[S]	APISGGDHAEVDVPK		P24821	P24821 [928-942]	1491.74	17.82	3.24331e+06	1.5634e+06
[Y].LSLTPEQW.[K]	LSLTPEQW		P0CG05; P0CG04	P0CG05 [72-79]	973.499	42.8	3.24228e+06	1.33373e+06
[Q].PLMQQVPQPIPQT.[L]	PLMQQVPQPIPQT	1xOxidation [M3]	P05814	P05814 [148-160]	1492.78	24.62	3.20514e+06	947870
[L].SLDSTPQDGNVVV.[A]	SLDSTPQDGNVVV		P01877	P01877 [12-24]	1330.65	24.23	3.19369e+06	2.15871e+06
[M].VNIENPEGIPV.[K]	VNIENPEGIPV		P01024	P01024 [165-175]	1180.62	35.49	3.16443e+06	1.29601e+06
[H].QDKIYPSFQPQP.[L]	QDKIYPSFQPQP		P05814	P05814 [52-63]	1447.72	26.01	3.14659e+06	1.36084e+06
[N].ENSHVQVPF.[Q]	ENSHVQVPF		P47710	P47710 [128-136]	1056.51	25.56	3.13269e+06	2.89429e+06
[H].EDQQQGEDEHQDKIYPS.[F]	EDQQQGEDEHQDKIYPS		P05814	P05814 [42-58]	2045.87	14.96	3.06606e+06	318590
[F].ILPDQDKMEE.[V]	ILPDQDKMEE		P01011	P01011 [277-286]	1217.57	18.67	3.01314e+06	972669
[L].QPLMQQVPQPI.[P]	QPLMQQVPQPI		P05814	P05814 [147-157]	1278.69	35.4	2.95833e+06	1.3098e+06
[K].NADLQVLKPEPEL.[V]	NADLQVLKPEPEL		P01833	P01833 [232-244]	1465.79	36.03	2.95035e+06	2.66199e+06
[R].SSEDPNEDIVERN.[I]	SSEDPNEDIVERN		P01591	P01591 [47-59]	1503.66	16.32	2.91684e+06	2.61913e+06
[Y].PSFQPQP.[L]	PSFQPQP		P05814	P05814 [57-63]	800.394	18.78	2.88125e+06	415777
[K].VKHEDQQQGEDEHQDK.[I]	VKHEDQQQGEDEHQDK		P05814	P05814 [39-54]	1949.86	5.01	2.8767e+06	486950
[K].KGFDPMTPENG.[F]	KGFDPMTPENG		Q13410	Q13410 [382-392]	1192.53	21.2	2.86667e+06	339633
[R].WLQGSQELPRE.[K]	WLQGSQELPRE		P01876; P01877	P01876 [264-274]	1342.67	23.78	2.83616e+06	2.41431e+06
[Q].YSIGNLKPDTE.[Y]	YSIGNLKPDTE		P24821	P24821 [858-868]	1236.61	22.89	2.82718e+06	590403
[V].TLDGGFIYEAGLAP.[Y]	TLDGGFIYEAGLAP		P02788	P02788 [77-90]	1423.71	44.77	2.79655e+06	318020
[L].SLDSTPQDGNVV.[V]	SLDSTPQDGNVV		P01877	P01877 [12-23]	1231.58	20.78	2.78938e+06	1.46817e+06
[A].STEQAPEL.[E]	STEQAPEL		P24821	P24821 [1070-1077]	874.415	19.39	2.76675e+06	299792
[F].VPVIDGDFIPADPIN.[L]	VPVIDGDFIPADPIN		P19835	P19835 [308-322]	1581.82	45.48	2.75659e+06	491034
[F].LDDDITDDIM.[C]	LDDDITDDIM		P00709	P00709 [100-109]	1165.49	40.49	2.75626e+06	653871
[Q].LVESGGGLVQPGGSL.[R]	LVESGGGLVQPGGSL		P01766	P01766 [4-18]	1369.73	31.58	2.75184e+06	764309
[R].SSEDPNEDIVE.[R]	SSEDPNEDIVE		P01591	P01591 [47-57]	1233.51	18.8	2.73108e+06	1.87343e+06
[W].LQGSQELPREKY.[L]	LQGSQELPREKY		P01876; P01877	P01876 [265-276]	1447.75	17.51	2.70996e+06	1.668e+06
[Q].DKDGSFSVVIT.[G]	DKDGSFSVVIT		P01833	P01833 [303-313]	1167.59	29.29	2.70188e+06	1.37877e+06
[V].AWKADSSPV.[K]	AWKADSSPV		P0CG05	P0CG05 [41-49]	960.479	18.18	2.6955e+06	1.77262e+06
[A].VVLPVPQPEIMEVPK.[A]	VVLPVPQPEIMEVPK		P05814	P05814 [89-103]	1674.95	44.22	2.69073e+06	2.64717e+06
[Q].QGEDEHQDKIYPSFQPQPL.[I]	QGEDEHQDKIYPSFQPQPL		P05814	P05814 [46-64]	2256.06	33.23	2.68156e+06	769933
[K].VKHEDQQQGEDEH.[Q]	VKHEDQQQGEDEH		P05814	P05814 [39-51]	1578.68	5.34	2.67769e+06	323099
[Q].DKIYPSFQPQP.[L]	DKIYPSFQPQP		P05814	P05814 [53-63]	1319.66	26.16	2.6665e+06	448122
[R].LAGAPSEDPQFPK.[V]	LAGAPSEDPQFPK		O00391	O00391 [488-500]	1356.68	21.47	2.62522e+06	246157
[L].LNPQDKDGSFSVVIT.[G]	LNPQDKDGSFSVVIT		P01833	P01833 [299-313]	1619.83	31.33	2.62068e+06	2.00685e+06
[R].ATGIPDRFSGSGSGTDF.[T]	ATGIPDRFSGSGSGTDF		P01620	P01620 [56-72]	1671.76	28.93	2.6169e+06	2.06869e+06
[K].SGNTFRPEVHLLPPPSEEL.[A]	SGNTFRPEVHLLPPPSEEL		P01876; P01877	P01876 [222-240]	2119.08	42.66	2.61421e+06	2.3966e+06
[W].WERYQPVS.[Y]	WERYQPVS		P04745	P04745 [74-81]	1064.52	18.63	2.60959e+06	261061
[Y].FYAPEL.[L]	FYAPEL		P02768	P02768 [173-178]	739.366	36.03	2.60949e+06	228102
[L].EVEPSDTIENV.[K]	EVEPSDTIENV		P62979	P62987 [16-26]	1231.57	24.06	2.60249e+06	311759
[L].LYPFPK.[D]	LYPFPK		P24821	P24821 [1977-1982]	764.434	25.05	2.58408e+06	445050
[R].LDIQGTGQLL.[F]	LDIQGTGQLL		P01833	P01833 [193-202]	1057.59	40.76	2.57158e+06	952820
[F].ISADDVPGSN.[I]	ISADDVPGSN		P47989	P47989 [636-645]	974.443	16.96	2.55228e+06	516173
[M].IIVPTDTQN.[I]	IIVPTDTQN		P01011	P01011 [402-410]	1000.53	20.17	2.54859e+06	947959
[M].YESWVPK.[L]	YESWVPK		P06858	P06858 [88-94]	908.451	21.36	2.5464e+06	318135
[K].SYDIAQDAPDGL.[A]	SYDIAQDAPDGL		P23280	P23280 [148-159]	1264.57	34.26	2.52163e+06	369861
[K].HMWPGDIK.[A]	HMWPGDIK		P04745	P04745 [216-223]	983.477	20.42	2.51909e+06	733823
[V].VLPVPQPEIM.[E]	VLPVPQPEIM	1xOxidation [M10]	P05814	P05814 [90-99]	1138.62	32.35	2.49586e+06	511887
[M].TGFAPDTDDLK.[Q]	TGFAPDTDDLK		P01024	P01024 [1409-1419]	1179.55	21.69	2.48477e+06	2.00748e+06
[T].IIQELEPGVE.[Y]	IIQELEPGVE		P24821	P24821 [678-687]	1126.6	27.18	2.48324e+06	1.07581e+06
[M].DIHFHSPA.[F]	DIHFHSPA		P10909	P10909 [259-266]	923.437	18.44	2.47229e+06	709569
[E].IKIIEGEPN.[L]	IKIIEGEPN		P01833	P01833 [455-463]	1012.57	19.91	2.45663e+06	377388
[Q].DFLPDSIT.[L]	DFLPDSIT		P01871	P01871 [32-39]	907.441	39.88	2.44259e+06	1.60984e+06
[K].YVTSAPMPEPQAPG.[R]	YVTSAPMPEPQAPG		P01871	P01871 [377-390]	1444.68	23.67	2.43773e+06	1.84764e+06
[L].NPQDKDGSFSVVIT.[G]	NPQDKDGSFSVVIT		P01833	P01833 [300-313]	1506.74	28.29	2.42411e+06	1.67576e+06
[S].TKSPIFGPEEV.[N]	TKSPIFGPEEV		P01833	P01833 [18-28]	1203.63	28.94	2.41842e+06	827260
[L].LVDSEGWVKA.[Q]	LVDSEGWVKA		P01833	P01833 [398-407]	1103.57	24.43	2.41539e+06	1.53687e+06
[P].EIMEVPK.[A]	EIMEVPK		P05814	P05814 [97-103]	845.444	19.31	2.40666e+06	1.25758e+06
[E].FTPTEKDEY.[A]	FTPTEKDEY		P61769	P61769 [90-98]	1129.5	16.63	2.40553e+06	852905
[K].WVGADHADDIQ.[Y]	WVGADHADDIQ		P19835	P19835 [450-460]	1226.54	19.11	2.40442e+06	1.46468e+06
[D].EHQDKIYPSFQPQPL.[I]	EHQDKIYPSFQPQPL		P05814	P05814 [50-64]	1826.91	32.04	2.37354e+06	745395
[F].RRPDIQYPDATDE.[D]	RRPDIQYPDATDE		P10451	P10451 [175-187]	1575.74	18.11	2.37059e+06	693287
[R].LQNPSESSEPIP.[L]	LQNPSESSEPIP	1xPhospho [S7]	P47710	P47710 [27-38]	1377.59	23.85	2.35941e+06	960185
[R].GSFEFPVGDAVS.[K]	GSFEFPVGDAVS		P0C0L4	P0C0L5 [917-928]	1211.56	42.54	2.34889e+06	1.46216e+06
[W].NDLWLNEG.[F]	NDLWLNEG		P15144	Q9NZ08 [370-377]	960.442	42.03	2.31723e+06	1.27812e+06
[R].LDAPSQIEV.[K]	LDAPSQIEV		P24821	P24821 [803-811]	971.504	28.71	2.31647e+06	1.02524e+06
[K].QVGSGVTTDQVQAEA.[K]	QVGSGVTTDQVQAEA		P01871	P01871 [154-168]	1489.71	19.05	2.3141e+06	1.73378e+06
[H].TSDSDVPSGV.[T]	TSDSDVPSGV		P10909	P10909 [393-402]	963.427	17.85	2.31022e+06	628413
[R].NFPPSQDASGDLYTTSSQL.[T]	NFPPSQDASGDLYTTSSQL		P01876; P01877	P01876 [52-70]	2027.92	42.06	2.31016e+06	772565
[L].LVDSEGWVKAQYEGRLS.[L]	LVDSEGWVKAQYEGRLS		P01833	P01833 [398-414]	1936.98	30.9	2.30125e+06	587484
[N].DDNPWIQV.[N]	DDNPWIQV		Q08431	Q08431 [123-130]	986.458	42.07	2.27084e+06	546966
[I].IQELEPGVE.[Y]	IQELEPGVE		P24821	P24821 [679-687]	1013.51	21.88	2.26736e+06	906693
[Y].SIGNLKPDTEYE.[V]	SIGNLKPDTEYE		P24821	P24821 [859-870]	1365.65	21.22	2.26289e+06	682344
[L].ESASGEKDLAPPSEPSES.[F]	ESASGEKDLAPPSEPSES		P24821	P24821 [69-86]	1816.81	17.53	2.23996e+06	268878
[W].KVDNALQSGNSQESV.[T]	KVDNALQSGNSQESV		P01834	P01834 [41-55]	1575.76	16.61	2.23123e+06	1.37471e+06
[K].HEDQQQGEDEHQDKIYPSFQPQPL.[I]	HEDQQQGEDEHQDKIYPSFQPQPL		P05814	P05814 [41-64]	2893.3	30.22	2.22836e+06	711380
[L].LNPQDKDGSF.[S]	LNPQDKDGSF		P01833	P01833 [299-308]	1120.53	16.46	2.2262e+06	586456
[F].SISNSAEDPFIAIHAESK.[L]	SISNSAEDPFIAIHAESK		P04745	P04745 [493-510]	1915.94	31.57	2.22251e+06	636747
[V].IDGDFIPADPI.[N]	IDGDFIPADPI		P19835	P19835 [311-321]	1172.58	44.45	2.21395e+06	1.11358e+06
[F].DVIGPPEPI.[L]	DVIGPPEPI		Q13410	Q13410 [30-38]	936.504	33.75	2.19668e+06	208613
[I].PQQVVPYPQ.[R]	PQQVVPYPQ		P05814	P05814 [180-188]	1055.55	21.81	2.19587e+06	438107
[C].HPNSPLDEENL.[T]	HPNSPLDEENL		P01011	P01011 [24-34]	1264.58	22.7	2.19515e+06	862624
[F].IFPPSDEQLK.[S]	IFPPSDEQLK		P01834	P01834 [9-18]	1173.62	22.56	2.18661e+06	1.64278e+06
[L].VESGGGLVQPGGS.[L]	VESGGGLVQPGGS		P01766	P01766 [5-17]	1143.56	17.55	2.17263e+06	766332
[K].EVIFSDITEN.[S]	EVIFSDITEN		P24821	P24821 [1715-1724]	1166.56	35.66	2.16968e+06	308579
[R].VATYLPAPEGL.[K]	VATYLPAPEGL		P24821	P24821 [708-718]	1130.61	41.67	2.16045e+06	1.25203e+06
[L].EGNEQFINAA.[K]	EGNEQFINAA		Q8NHM4	P07477 [82-91]	1092.5	21.86	2.15338e+06	235202
[W].LQGSQELP.[R]	LQGSQELP		P01876; P01877	P01876 [265-272]	871.452	20.13	2.14736e+06	890846
[L].DGGFIYEAGLAP.[Y]	DGGFIYEAGLAP		P02788	P02788 [79-90]	1209.58	43.92	2.13128e+06	1.07765e+06
[Y].SIGNLKPDTEY.[E]	SIGNLKPDTEY		P24821	P24821 [859-869]	1236.61	21.78	2.12255e+06	592915
[F].SEADNVVSGE.[I]	SEADNVVSGE		P47989	P47989 [725-734]	1006.43	14.54	2.10984e+06	419878
[F].IQVQEADTVE.[A]	IQVQEADTVE		P24821	P24821 [1197-1206]	1131.55	19.53	2.08134e+06	393160
[R].LSLHRPALEDL.[L]	LSLHRPALEDL		P01876; P01877	P01876 [127-137]	1263.71	31.24	2.07151e+06	1.82859e+06
[V].TEDLPQLGDL.[A]	TEDLPQLGDL		P24821	P24821 [1344-1353]	1100.55	43.81	2.03365e+06	406716
[Q].DLNAPSDWDSR.[G]	DLNAPSDWDSR	1xPhospho [S10]	P10451	P10451 [210-220]	1355.53	22.59	2.00588e+06	523463
[W].LQGSQELPREKYLT.[W]	LQGSQELPREKYLT		P01876; P01877	P01876 [265-278]	1661.89	20.96	2.00176e+06	2.00176e+06
[K].QGHFYGETAAV.[Y]	QGHFYGETAAV		P01833	P01833 [548-558]	1179.54	20.1	1.99559e+06	1.83542e+06
[V].DSEGWVKA.[Q]	DSEGWVKA		P01833	P01833 [400-407]	891.421	18.95	1.98381e+06	1.02768e+06
[R].NPSDPMPQAPA.[L]	NPSDPMPQAPA		P0C0L4	P0C0L5 [1249-1259]	1124.5	19.66	1.98151e+06	889285
[Q].YLPNSHPPT.[V]	YLPNSHPPT		P07498	P07498 [98-106]	1025.51	15.78	1.9705e+06	322007
[K].DLLFKDSAIG.[F]	DLLFKDSAIG		P02788	P02788 [316-325]	1078.58	36.88	1.96988e+06	1.02664e+06
[F].WMNGDRIDS.[L]	WMNGDRIDS		P10909	P10909 [153-161]	1093.47	19.52	1.96636e+06	526831
[R].STDLPGLKA.[A]	STDLPGLKA		P24821	P24821 [1219-1227]	901.499	21.72	1.95477e+06	289815
[L].LVDSEGWVKAQYEG.[R]	LVDSEGWVKAQYEG		P01833	P01833 [398-411]	1580.76	27.51	1.95457e+06	876499
[R].ILLNPQDKDGSFSVVIT.[G]	ILLNPQDKDGSFSVVIT		P01833	P01833 [297-313]	1846	43.81	1.95248e+06	1.95248e+06
[A].QPAVVLPVPQ.[P]	QPAVVLPVPQ		P05814	P05814 [86-95]	1047.62	34.75	1.945e+06	1.35403e+06
[M].LDVMQDH.[F]	LDVMQDH		P10909	P10909 [173-179]	857.382	16.89	1.94452e+06	406044
[F].QLNELQGL.[K]	QLNELQGL		P02788	P02788 [124-131]	914.494	32.37	1.93735e+06	602394
[V].YEDLRGSVTFH.[C]	YEDLRGSVTFH		P01833	P01833 [246-256]	1323.63	21.58	1.92986e+06	1.60474e+06
[V].LPVPQPEIME.[V]	LPVPQPEIME		P05814	P05814 [91-100]	1152.6	37.25	1.90676e+06	501330
[K].ISRVEAEDVGV.[Y]	ISRVEAEDVGV		P01617	P01617 [80-90]	1173.61	21.27	1.90379e+06	1.34667e+06
[Y].TEGGFVEGVNK.[K]	TEGGFVEGVNK		P19835	P19835 [28-38]	1136.56	17.7	1.90195e+06	1.2924e+06
[L].ENPQPHPGWQGT.[L]	ENPQPHPGWQGT		P19835	P19835 [63-74]	1347.61	17.03	1.87716e+06	368531
[I].PFFDPQIPK.[L]	PFFDPQIPK		P05814	P05814 [124-132]	1088.58	35.4	1.87668e+06	330270
[L].VVYTPTHEGGLEM.[Q]	VVYTPTHEGGLEM		P24821	P24821 [654-666]	1432.68	26.23	1.86912e+06	504384
[M].TGFAPDTDDL.[K]	TGFAPDTDDL		P01024	P01024 [1409-1418]	1051.46	30.39	1.86619e+06	1.1822e+06
[V].DFPTSGVAGGDMETFENIRAAGGKMCWAP.[K]	DFPTSGVAGGDMETFENIRAAGGKMCWAP	1xPhospho [T14]; 1xOxidation [M25]	Q9HC84	Q9HC84 [1797-1825]	3111.3	17.8	1.86548e+06	450871
[V].PQPEIMEVPK.[A]	PQPEIMEVPK	1xOxidation [M6]	P05814	P05814 [94-103]	1183.6	39.65	1.86324e+06	236159
[F].FREDGSYEEA.[L]	FREDGSYEEA		Q13410	Q13410 [126-135]	1202.5	15.53	1.85531e+06	503195
[D].IQYPDATDE.[D]	IQYPDATDE		P10451	P10451 [179-187]	1051.46	19.19	1.85292e+06	408026
[T].LFPPSSEELQANKA.[T]	LFPPSSEELQANKA		P0CG05; P0CG04	P0CG05 [11-24]	1530.78	25.2	1.84131e+06	1.52142e+06
[T].LFPPSSEELQ.[A]	LFPPSSEELQ		P0CG05; P0CG04	P0CG05 [11-20]	1146.57	29.15	1.83781e+06	938837
[S].FETNSGNPFH.[Y]	FETNSGNPFH		P47989	P47989 [1143-1152]	1149.5	20.38	1.8309e+06	521665
[G].WNVPIGT.[L]	WNVPIGT		P02788	P02788 [144-150]	786.414	32.34	1.80306e+06	371611
[E].VENDEMPAD.[L]	VENDEMPAD		P02768	P02768 [317-325]	1019.4	14.7	1.79786e+06	408507
[K].VPQVSTPT.[L]	VPQVSTPT		P02768	P02768 [439-446]	828.446	17.26	1.79165e+06	185323
[M].CAKVGDQPTLQL.[K]	CAKVGDQPTLQL	1xAcetyl [N-Term]	Q9UHA7	Q9UHA7 [76-87]	1314.67	30.38	1.78139e+06	144313
[-].EVQLVESGGGLVQPG.[G]	EVQLVESGGGLVQPG		P01766	P01766 [1-15]	1468.76	31.99	1.77848e+06	1.18216e+06
[R].ALVFVDNHDNQ.[R]	ALVFVDNHDNQ		P04745	P04745 [307-317]	1271.6	22.61	1.77116e+06	296060
[A].VVLPVPQPEIME.[V]	VVLPVPQPEIME		P05814	P05814 [89-100]	1350.73	44.64	1.76872e+06	884235
[F].SISNSAEDPFIAI.[H]	SISNSAEDPFIAI		P04745	P04745 [493-505]	1363.67	45.2	1.76336e+06	63405.6
[L].ISDFYPGAV.[T]	ISDFYPGAV		P0CG05; P0CG04	P0CG05 [30-38]	968.472	33.6	1.76253e+06	908461
[K].GFDPMTPENG.[F]	GFDPMTPENG		Q13410	Q13410 [383-392]	1064.44	24.66	1.7607e+06	194515
[A].QPAVVLPVPQPE.[I]	QPAVVLPVPQPE		P05814	P05814 [86-97]	1273.72	37.65	1.75452e+06	1.01881e+06
[Y].AASSYLSLTPEQ.[W]	AASSYLSLTPEQ		P0CG05; P0CG04	P0CG05 [67-78]	1266.62	31.08	1.75149e+06	1.71752e+06
[H].MWPGDIK.[A]	MWPGDIK		P04745	P04745 [217-223]	846.418	24.6	1.74937e+06	343916
[L].PVPQPEIME.[V]	PVPQPEIME		P05814	P05814 [92-100]	1039.51	26.34	1.74847e+06	545236
[K].SNESHDHMDDMDDEDDDDHVDSQ.[D]	SNESHDHMDDMDDEDDDDHVDSQ	1xOxidation [M]	P10451	P10451 [78-100]	2718.89	9.03	1.74192e+06	664039
[R].YSPGESWHP.[Y]	YSPGESWHP		Q6WN34	Q6WN34 [40-48]	1059.45	21.2	1.74111e+06	336204
[P].AVVLPVPQPEIM.[E]	AVVLPVPQPEIM		P05814	P05814 [88-99]	1292.73	44.97	1.73828e+06	440339
[Q].DKIYPSFQPQ.[P]	DKIYPSFQPQ		P05814	P05814 [53-62]	1222.61	23.89	1.73172e+06	231359
[Y].YTEFTPTEKDEY.[A]	YTEFTPTEKDEY		P61769	P61769 [87-98]	1522.66	21.74	1.71785e+06	1.06567e+06
[Q].QGEDEHQDKIYPSFQPQP.[L]	QGEDEHQDKIYPSFQPQP		P05814	P05814 [46-63]	2142.97	24.05	1.7166e+06	1.28787e+06
[T].LFPPSSEELQAN.[K]	LFPPSSEELQAN		P0CG05; P0CG04	P0CG05 [11-22]	1331.65	27.73	1.71172e+06	841469
[L].AEIDGIELT.[Y]	AEIDGIELT		P24821	P24821 [828-836]	960.488	38	1.70605e+06	917712
[A].LLQDNIADAV.[A]	LLQDNIADAV		P61626	P61626 [102-111]	1071.57	33.91	1.69772e+06	558722
[D].LSGVTEEAPL.[K]	LSGVTEEAPL		P01009	P01009 [342-351]	1015.53	26.72	1.68494e+06	298531
[R].ASGVPDRFSGSGSGTDF.[T]	ASGVPDRFSGSGSGTDF		P01617	P01617 [60-76]	1643.73	24.37	1.67624e+06	1.4488e+06
[L].TDLENLHLPLPL.[L]	TDLENLHLPLPL		P05814	P05814 [134-145]	1374.76	47	1.66327e+06	665600
[M].QYVPFPPFS.[D]	QYVPFPPFS		P47710	P47710 [157-165]	1081.54	45.59	1.6601e+06	233571
[R].TTIDLTEDENQY.[S]	TTIDLTEDENQY		P24821	P24821 [847-858]	1441.63	27.9	1.63762e+06	280883
[A].QPAVVLPVPQPEI.[M]	QPAVVLPVPQPEI		P05814	P05814 [86-98]	1386.8	44.94	1.63498e+06	1.22691e+06
[R].VPGDQTSTII.[Q]	VPGDQTSTII		P24821	P24821 [670-679]	1030.54	24	1.61367e+06	1.07691e+06
[P].AVVLPVPQPE.[I]	AVVLPVPQPE		P05814	P05814 [88-97]	1048.6	34.37	1.61181e+06	247197
[K].YVTSAPMPEPQAPG.[R]	YVTSAPMPEPQAPG	1xOxidation [M7]	P01871	P01871 [377-390]	1460.67	20.56	1.60864e+06	1.20752e+06
[V].FEDLSDEAERDEY.[E]	FEDLSDEAERDEY		P02788	P02788 [234-246]	1617.66	23.5	1.60441e+06	1.46297e+06
[K].ETSVEVEWDPL.[D]	ETSVEVEWDPL		P24821	P24821 [725-735]	1303.61	45.19	1.5985e+06	424257
[L].CLTQFQVDMEAVGE.[T]	CLTQFQVDMEAVGE	1xAcetyl [N-Term]; 1xOxidation [M9]	O60894	O60894 [40-53]	1627.7	38.69	1.59725e+06	756497
[T].FTTGLDAPR.[N]	FTTGLDAPR		P24821	P24821 [889-897]	977.505	19.6	1.59322e+06	367778
[W].YVDGVEVH.[N]	YVDGVEVH		P01857	P01857 [161-168]	917.436	16.47	1.59032e+06	583012
[L].MQQVPQPIP.[Q]	MQQVPQPIP		P05814	P05814 [150-158]	1037.54	25.46	1.58777e+06	1.05529e+06
[Q].NPSESSEPIPL.[E]	NPSESSEPIPL	1xPhospho [S5]	P47710	P47710 [29-39]	1249.53	33.81	1.57195e+06	306740
[K].AAPSVTLFPPSSEEL.[Q]	AAPSVTLFPPSSEEL		P0CG05	P0CG05 [5-19]	1544.78	45.01	1.55333e+06	842241
[R].LSLHRPALE.[D]	LSLHRPALE		P01876; P01877	P01876 [127-135]	1035.59	20.21	1.55105e+06	1.17383e+06
[Y].TGEKVPEIT.[R]	TGEKVPEIT		P24821	P24821 [1834-1842]	973.52	19.01	1.5426e+06	1.4229e+06
[T].SVEVEWDPL.[D]	SVEVEWDPL		P24821	P24821 [727-735]	1073.51	45.02	1.54004e+06	844867
[K].GFEESEPV.[S]	GFEESEPV		P24821	P24821 [1784-1791]	893.389	20.33	1.53227e+06	1.04134e+06
[Q].EYDESGPSIVH.[R]	EYDESGPSIVH		P60709	P60709 [361-371]	1232.54	18.55	1.52158e+06	282455
[E].SSEPIPLE.[S]	SSEPIPLE		P47710	P47710 [33-40]	871.441	24.85	1.5175e+06	485596
[R].QAPGQGLEW.[M]	QAPGQGLEW		P01743	P01743 [58-66]	985.474	31.82	1.51536e+06	614349
[K].TVVDFETDV.[L]	TVVDFETDV		P19835	P19835 [403-411]	1024.48	34.34	1.50274e+06	719185
[A].QPAVVLPVPQPEIM.[E]	QPAVVLPVPQPEIM		P05814	P05814 [86-99]	1517.84	45.73	1.49955e+06	950011
[M].MTGFAPDTDDL.[K]	MTGFAPDTDDL		P01024	P01024 [1408-1418]	1182.5	35.41	1.49115e+06	684434
[-].DIVMTQSPL.[S]	DIVMTQSPL		P01617	P01617 [1-9]	1003.51	34.48	1.48891e+06	932408
[L].TVSEEEWNTGET.[Y]	TVSEEEWNTGET		P01871	P01871 [399-410]	1381.58	20.7	1.4775e+06	1.4775e+06
[V].VVDVSHEDPEV.[K]	VVDVSHEDPEV		P01857	P01857 [146-156]	1224.57	19.35	1.47731e+06	867489
[F].SSQEPYFSYSGA.[F]	SSQEPYFSYSGA		P02788	P02788 [203-214]	1322.55	25.48	1.47705e+06	1.39272e+06
[F].AKTGDPNMGDSAVPT.[H]	AKTGDPNMGDSAVPT		P19835	P19835 [492-506]	1460.67	17.3	1.47429e+06	333691
[A].RETIESLSSSEESITE.[Y]	RETIESLSSSEESITE	1xPhospho [S]	P05814	P05814 [16-31]	1876.81	28.28	1.46528e+06	844927
[R].WLQGSQELP.[R]	WLQGSQELP		P01876; P01877	P01876 [264-272]	1057.53	33.21	1.46429e+06	1.35878e+06
[F].LQTDQPIYNPGQ.[R]	LQTDQPIYNPGQ		P0C0L4	P0C0L5 [143-154]	1373.67	21.51	1.46426e+06	758358
[K].SVRPNDEVTAV.[L]	SVRPNDEVTAV		P12273	P12273 [45-55]	1186.61	17.75	1.46115e+06	1.46115e+06
[Y].SVVRNEQVEI.[R]	SVVRNEQVEI		P01024	P01024 [838-847]	1172.63	20.62	1457541	1.45754e+06
[L].LVDSEGWVK.[A]	LVDSEGWVK		P01833	P01833 [398-406]	1032.54	22.05	1.45045e+06	148622
[A].VVLPVPQPEIMEVPKA.[K]	VVLPVPQPEIMEVPKA	1xOxidation [M11]	P05814	P05814 [89-104]	1761.98	40.75	1.44293e+06	351973
[Y].GGIALPEL.[I]	GGIALPEL		P00709	P00709 [38-45]	769.445	44.6	1.41505e+06	302706
[E].RLQNPSESSEPIPL.[E]	RLQNPSESSEPIPL		P47710	P47710 [26-39]	1566.81	28.83	1.41384e+06	372049
[F].DTGSSNLW.[V]	DTGSSNLW		P07339	P07339 [97-104]	879.384	27.44	1.41363e+06	186874
[R].LQNPSESSEPIP.[L]	LQNPSESSEPIP		P47710	P47710 [27-38]	1297.63	22.14	1.40782e+06	574586
[F].VPVIDGDFIPAD.[P]	VPVIDGDFIPAD		P19835	P19835 [308-319]	1257.64	43.91	1.40716e+06	208121
[V].FEDLSDEAERDE.[Y]	FEDLSDEAERDE		P02788	P02788 [234-245]	1454.59	19.98	1.40678e+06	1.21318e+06
[K].ETFTTGLDAPR.[N]	ETFTTGLDAPR		P24821	P24821 [887-897]	1207.6	22.19	1.40493e+06	710117
[A].WTPSSNDDNPW.[I]	WTPSSNDDNPW		Q08431	Q08431 [117-127]	1318.53	32.09	1.40128e+06	161372
[L].IDEDDIPV.[R]	IDEDDIPV		P0C0L4	P0C0L5 [767-774]	915.431	27.59	1.39779e+06	933385
[K].NADLQVLKPEPE.[L]	NADLQVLKPEPE		P01833	P01833 [232-243]	1352.71	23.84	1.39413e+06	775735
[V].GWYPEPQ.[V]	GWYPEPQ		Q13410	Q13410 [168-174]	876.389	25.22	1.39262e+06	524236
[R].MNENSHVQVPF.[Q]	MNENSHVQVPF	1xOxidation [M1]	P47710	P47710 [126-136]	1317.59	25.46	1.39216e+06	387334
[F].RISHELDSASSEVN.[-]	RISHELDSASSEVN	1xPhospho [S]	P10451	P10451 [301-314]	1623.7	15.98	1.38636e+06	642277
[V].KHEDQQQGEDEHQDKIYPSFQPQPL.[I]	KHEDQQQGEDEHQDKIYPSFQPQPL		P05814	P05814 [40-64]	3021.4	27.56	1.38596e+06	625477
[F].VELGTQPAT.[Q]	VELGTQPAT		P02652	P02652 [91-99]	915.478	17.75	1.38585e+06	568622
[W].EMPFDPQDTHQ.[S]	EMPFDPQDTHQ		P01011	P01011 [218-228]	1344.55	22.46	1.37622e+06	459848
[R].ILLNPQDKDGSFSVV.[I]	ILLNPQDKDGSFSVV		P01833	P01833 [297-311]	1631.86	40.61	1.37306e+06	1.37306e+06
[Y].TEFTPTEKDEY.[A]	TEFTPTEKDEY		P61769	P61769 [88-98]	1359.6	19.44	1.3704e+06	541239
[R].SGNEDEFRNMV.[T]	SGNEDEFRNMV		P04745	P04745 [88-98]	1297.55	25	1.36648e+06	513264
[A].TWLNPDPSQKQ.[N]	TWLNPDPSQKQ		P10451	P10451 [42-52]	1313.65	22.07	1.36047e+06	239814
[I].SYTGEKVPEIT.[R]	SYTGEKVPEIT		P24821	P24821 [1832-1842]	1223.62	21.04	1.35854e+06	432226
[L].LVDSEGWVKAQ.[Y]	LVDSEGWVKAQ		P01833	P01833 [398-408]	1231.63	22.28	1.34097e+06	1.05269e+06
[L].NWTGPPEPIE.[A]	NWTGPPEPIE		P02788	P02788 [156-165]	1139.54	29.63	1.33541e+06	248325
[I].YPSFQPQP.[L]	YPSFQPQP		P05814	P05814 [56-63]	963.457	24.33	1.33085e+06	319871
[Q].DKDGSFSVV.[I]	DKDGSFSVV		P01833	P01833 [303-311]	953.457	22.09	1.32864e+06	784678
[L].LVYESVDGTVKE.[V]	LVYESVDGTVKE		P24821	P24821 [1919-1930]	1338.68	20.99	1.31025e+06	407539
[F].GSPSGQKDLLFKDSAIGF.[S]	GSPSGQKDLLFKDSAIGF		P02788	P02788 [309-326]	1866.96	42.17	1.3084e+06	255662
[S].TKSPIFGPEEVN.[S]	TKSPIFGPEEVN		P01833	P01833 [18-29]	1317.67	24.31	1.30781e+06	234345
[Q].DLNAPSDW.[D]	DLNAPSDW		P10451	P10451 [210-217]	917.4	30.34	1.28748e+06	533483
[V].YTPTHEGGLEM.[Q]	YTPTHEGGLEM		P24821	P24821 [656-666]	1234.54	20.95	1.27621e+06	467390
[R].NFPPSQDASGDLY.[T]	NFPPSQDASGDLY		P01876; P01877	P01876 [52-64]	1410.62	30.78	1.27587e+06	288039
[E].HQDKIYPSFQPQPL.[I]	HQDKIYPSFQPQPL		P05814	P05814 [51-64]	1697.86	31.21	1.26352e+06	334431
[M].DVGSSLNPAID.[I]	DVGSSLNPAID		P47989	P47989 [1182-1192]	1087.53	24.75	1.25911e+06	153161
[F].HAMFQPF.[L]	HAMFQPF	1xOxidation [M3]	P10909	P10909 [241-247]	893.397	25.34	1.254e+06	359115
[L].DLSDNPGLGER.[G]	DLSDNPGLGER		P08571	P08571 [200-210]	1172.55	18.3	1.25303e+06	187604
[E].DEHQDKIYPSFQPQPL.[I]	DEHQDKIYPSFQPQPL		P05814	P05814 [49-64]	1941.93	34.7	1.24686e+06	359914
[L].KPEPELVYEDLRGSVT.[F]	KPEPELVYEDLRGSVT		P01833	P01833 [239-254]	1831.94	36.25	1.24455e+06	879532
[Y].LFIQTDKT.[I]	LFIQTDKT		P01024	P01024 [130-137]	965.53	20.59	1.23974e+06	1.23974e+06
[L].YASPDVSEPIDGLNPN.[E]	YASPDVSEPIDGLNPN		P16671	P16671 [348-363]	1687.78	31.95	1.23247e+06	179431
[S].VHVSPVEGL.[C]	VHVSPVEGL		P0C0L4	P0C0L5 [867-875]	936.515	24.12	1.23069e+06	599924
[Q].NPSESSEPIPL.[E]	NPSESSEPIPL		P47710	P47710 [29-39]	1169.57	29.91	1.22287e+06	278100
[R].EMSGSPASGIPV.[K]	EMSGSPASGIPV		P0C0L4	P0C0L5 [392-403]	1131.54	27.04	1.21255e+06	734361
[V].DSEGWVKAQYEG.[R]	DSEGWVKAQYEG		P01833	P01833 [400-411]	1368.61	22.09	1.20713e+06	1.00656e+06
[V].ASHTSDSDVPSGVTE.[V]	ASHTSDSDVPSGVTE		P10909	P10909 [390-404]	1488.64	15.57	1.20618e+06	253427
[Q].FRVPGDQ.[T]	FRVPGDQ		P24821	P24821 [668-674]	818.416	17.65	1.20443e+06	153928
[F].TVNFGDTEE.[A]	TVNFGDTEE		P01009	P01009 [168-176]	1011.43	19.72	1.20177e+06	257750
[K].RIPIEDGSGE.[V]	RIPIEDGSGE		P01024	P01024 [290-299]	1072.53	17.4	1.19977e+06	524207
[R].ITGLDPAGPNFE.[Y]	ITGLDPAGPNFE		P06858	P06858 [179-190]	1230.6	33.86	1.18466e+06	268381
[H].SDVIDSQELSKVSR.[E]	SDVIDSQELSKVSR	2xPhospho [S10; S]	P10451	P10451 [258-271]	1722.73	21.73	1.1834e+06	348908
[Y].RQTGLAPGQEYEI.[S]	RQTGLAPGQEYEI		P24821	P24821 [769-781]	1461.73	25.19	1.18088e+06	755596
[L].VHTSVSPSPDNL.[R]	VHTSVSPSPDNL		Q6WN34	Q6WN34 [340-351]	1252.62	19.58	1.18025e+06	186882
[L].PILNQPST.[Q]	PILNQPST		Q99541	Q99541 [95-102]	869.473	18.88	1.17827e+06	174541
[K].SPIFGPEEVNSV.[E]	SPIFGPEEVNSV		P01833	P01833 [20-31]	1274.63	37.51	1.17739e+06	638789
[F].IFPPSDEQLKSGTA.[S]	IFPPSDEQLKSGTA		P01834	P01834 [9-22]	1489.75	23.09	1.17547e+06	1.07803e+06
[E].DMVGRPLPH.[L]	DMVGRPLPH		P47989	P47989 [572-580]	1021.52	17.08	1.17041e+06	493524
[Y].SLSSVVTVPSSSLGTQT.[Y]	SLSSVVTVPSSSLGTQT		P01857	P01857 [64-80]	1649.86	35.04	1.16946e+06	971176
[S].DVIDSQELSKVSR.[E]	DVIDSQELSKVSR	2xPhospho [S9; S]	P10451	P10451 [259-271]	1635.7	22.17	1.16257e+06	304154
[Y].KTTPPVLDSDGSF.[F]	KTTPPVLDSDGSF		P01857	P01857 [275-287]	1363.67	26.38	1.16011e+06	348950
[H].LLPPPSEELALNEL.[V]	LLPPPSEELALNEL		P01876; P01877	P01876 [232-245]	1534.84	45.86	1.15804e+06	898569
[K].FRRPDIQYPDATDE.[D]	FRRPDIQYPDATDE		P10451	P10451 [174-187]	1722.81	21.92	1.15189e+06	346841
[R].KANDESNEHSDVIDSQE.[L]	KANDESNEHSDVIDSQE	1xPhospho [S6]	P10451	P10451 [249-265]	1996.78	13.98	1.15187e+06	285366
[W].VEHWPEE.[D]	VEHWPEE		P01024	P01024 [1628-1634]	925.405	18.34	1.1509e+06	252021
[R].SGIPIVTSPY.[Q]	SGIPIVTSPY		P01024	P01024 [344-353]	1033.56	36.85	1.14833e+06	603894
[L].DVFEEGTEAS.[A]	DVFEEGTEAS		P01011	P01011 [364-373]	1083.45	20.75	1.14481e+06	481915
[Y].ILTVPGHLDEM.[Q]	ILTVPGHLDEM		P0C0L4	P0C0L5 [252-262]	1224.63	35.55	1.14273e+06	667557
[R].SSEDPNEDIVERNIR.[I]	SSEDPNEDIVERNIR		P01591	P01591 [47-61]	1772.84	19.91	1.137e+06	443982
[L].AQDFLPDSIT.[L]	AQDFLPDSIT		P01871	P01871 [30-39]	1106.54	38.08	1.13317e+06	747405
[K].SPIFGPEEVNSVEGNSVSIT.[C]	SPIFGPEEVNSVEGNSVSIT		P01833	P01833 [20-39]	2062	43.38	1.13281e+06	881866
[W].NSGALTSGVHTFPA.[V]	NSGALTSGVHTFPA		P01857	P01857 [42-55]	1358.67	24.74	1.1328e+06	653871
[Q].LVESGGGLVQPG.[G]	LVESGGGLVQPG		P01766	P01766 [4-15]	1112.59	21.42	1.13236e+06	531043
[L].LDRFTEDA.[K]	LDRFTEDA		P01011	P01011 [150-157]	966.453	17.25	1.13168e+06	388871
[N].FRNVVDGQPF.[T]	FRNVVDGQPF		P04745	P04745 [412-421]	1178.6	28.92	1.12005e+06	101288
[R].QAPGQGLEWM.[G]	QAPGQGLEWM		P01743	P01743 [58-67]	1116.51	40.46	1.11806e+06	554367
[R].HYWEVEV.[G]	HYWEVEV		Q13410	Q13410 [358-364]	961.441	31.55	1.11459e+06	184092
[E].EQVNSLPGSIT.[K]	EQVNSLPGSIT		P01024	P01024 [1160-1170]	1144.58	24.35	1.11421e+06	121044
[K].SPIFGPEEVNSVEGN.[S]	SPIFGPEEVNSVEGN		P01833	P01833 [20-34]	1574.73	33.82	1.11068e+06	569066
[D].VTLDPDTAHPH.[L]	VTLDPDTAHPH		Q13410	Q13410 [305-315]	1202.58	16.01	1.10964e+06	282699
[R].ITYVPITGGTPS.[M]	ITYVPITGGTPS		P24821	P24821 [1742-1753]	1205.64	28.91	1.10958e+06	234317
[Q].LVESGGGLVQPGGS.[L]	LVESGGGLVQPGGS		P01766	P01766 [4-17]	1256.65	20.89	1.10389e+06	315671
[V].DSEGWVKAQ.[Y]	DSEGWVKAQ		P01833	P01833 [400-408]	1019.48	17.05	1.10049e+06	928129
[L].LFKDSAIGF.[S]	LFKDSAIGF		P02788	P02788 [318-326]	997.535	35.86	1.09956e+06	240757
[K].RIPIEDGSGEVVLS.[R]	RIPIEDGSGEVVLS		P01024	P01024 [290-303]	1470.78	29.76	1.09873e+06	789745
[V].NIAQLSQDDSGR.[Y]	NIAQLSQDDSGR		P01833	P01833 [96-107]	1303.62	16.6	1.0968e+06	997010
[Y].KQIGLYPVLVIDSSG.[Y]	KQIGLYPVLVIDSSG		P01833	P01833 [167-181]	1588.89	45	1.08494e+06	579727
[L].DVQDMLPR.[N]	DVQDMLPR		P23280	P23280 [200-207]	973.477	25.33	1.08437e+06	170332
[LM].SGGTTMYPGIAD.[R]	SGGTTMYPGIAD		P60709	P60709 [300-311]	1169.51	24.42	1.08225e+06	197755
[L].VQGFFPQEPLS.[V]	VQGFFPQEPLS		P01876; P01877	P01876 [28-38]	1248.63	42.55	1.08158e+06	296365
[R].LADGGATNQGRVEI.[F]	LADGGATNQGRVEI		Q08380	Q08380 [26-39]	1400.71	20.27	1.07962e+06	1.04748e+06
[F].AVTSILRVA.[A]	AVTSILRVA		P01876; P01877	P01876 [293-301]	929.578	29.47	1.07768e+06	1.0416e+06
[Y].ALTDLEPA.[T]	ALTDLEPA		P24821	P24821 [1853-1860]	829.43	24.62	1.07402e+06	560665
[V].NIENPEGIPV.[K]	NIENPEGIPV		P01024	P01024 [166-175]	1081.55	30.36	1.06691e+06	574424
[V].FEDLSDE.[A]	FEDLSDE		P02788	P02788 [234-240]	854.341	19.53	1.06674e+06	292149
[Q].YVPFPPFSDI.[S]	YVPFPPFSDI		P47710	P47710 [158-167]	1181.59	47.84	1.06143e+06	182507
[K].AAPSVTLFPPSSEELQANK.[A]	AAPSVTLFPPSSEELQANK		P0CG05	P0CG05 [5-23]	1986.02	37.92	1.05507e+06	860454
[E].FDFIHDVN.[K]	FDFIHDVN		Q08431	Q08431 [169-176]	1006.46	31.6	1.05337e+06	279426
[T].GLDVQDMLP.[R]	GLDVQDMLP		P23280	P23280 [198-206]	987.482	45.1	1.05155e+06	257971
[S].FEVIVEPTEK.[F]	FEVIVEPTEK		P01024	P01024 [232-241]	1190.63	26.06	1.04756e+06	866497
[V].VLPVPQPEIMEVPK.[A]	VLPVPQPEIMEVPK	1xOxidation [M10]	P05814	P05814 [90-103]	1591.88	32.65	1.04121e+06	359169
[V].TLDGGFIYEAGLAPY.[K]	TLDGGFIYEAGLAPY		P02788	P02788 [77-91]	1586.77	46.12	1.03694e+06	249213
[Y].VPITGGTPSM.[V]	VPITGGTPSM		P24821	P24821 [1745-1754]	959.487	22.61	1.03691e+06	169482
[A].VPIDIDKT.[K]	VPIDIDKT		P80303	P80303 [25-32]	900.504	19.51	1.03497e+06	183405
[K].AEFQDALEK.[L]	AEFQDALEK		P0C0L4	P0C0L5 [317-325]	1050.51	20.41	1.03065e+06	713595
[S].SNDDNPWIQV.[N]	SNDDNPWIQV		Q08431	Q08431 [121-130]	1187.53	40.18	1.02495e+06	207765
[F].SDITENSATVS.[W]	SDITENSATVS		P24821	P24821 [1719-1729]	1123.51	15.4	1.01834e+06	378511
[Q].YSIGNLKPDTEYE.[V]	YSIGNLKPDTEYE		P24821	P24821 [858-870]	1528.72	27.34	1.01783e+06	167063
[F].SSQEPYFSYS.[G]	SSQEPYFSYS		P02788	P02788 [203-212]	1194.49	24.36	1.01775e+06	1.01775e+06
[Q].IYPVTQP.[L]	IYPVTQP		P05814	P05814 [210-216]	817.445	21.54	1.01508e+06	195459
[T].EAEPEVDNL.[L]	EAEPEVDNL		P24821	P24821 [1618-1626]	1015.46	22.97	1.01364e+06	180862
[D].RFSGSGSGTDF.[T]	RFSGSGSGTDF		P01620; P01617; P06312	P01620 [62-72]	1117.49	17.92	1.01211e+06	660512
[F].GLLDEDGK.[K]	GLLDEDGK		P0C0L4	P0C0L5 [285-292]	846.42	17.51	1.00875e+06	478114
[F].EAVQEVPV.[G]	EAVQEVPV		P0C0L4	P0C0L5 [1539-1546]	870.457	21.34	1.00754e+06	595223
[K].VKHEDQQQGEDEHQDKIYPSFQPQ.[P]	VKHEDQQQGEDEHQDKIYPSFQPQ		P05814	P05814 [39-62]	2910.33	19.87	1.00544e+06	263037
[L].LNPTHQIYPVTQPL.[A]	LNPTHQIYPVTQPL		P05814	P05814 [204-217]	1620.87	32.73	1.0026e+06	434031
[R].KANDESNEHSDVIDSQ.[E]	KANDESNEHSDVIDSQ	2xPhospho [S10; S15]	P10451	P10451 [249-264]	1947.7	9.51	1.00146e+06	314121
[E].VEVGDRTDW.[A]	VEVGDRTDW		Q13410	Q13410 [362-370]	1076.5	21.11	998839	200692
[L].VYESVDGTV.[K]	VYESVDGTV		P24821	P24821 [1920-1928]	968.457	19.88	995400	230877
[I].NAATELDTPKDL.[Q]	NAATELDTPKDL		P24821	P24821 [980-991]	1287.64	23.86	989164	646783
[W].KVDNALQSGNSQESVTEQDSKDSTYSLS.[S]	KVDNALQSGNSQESVTEQDSKDSTYSLS		P01834	P01834 [41-68]	3017.38	19.83	981493	630602
[E].DQQQGEDEHQDKIYPS.[F]	DQQQGEDEHQDKIYPS		P05814	P05814 [43-58]	1916.83	15	976939	157551
[K].ASTEQAPELEN.[L]	ASTEQAPELEN		P24821	P24821 [1069-1079]	1188.54	16.64	975483	953884
[L].VTGFSPADV.[F]	VTGFSPADV		P01871	P01871 [353-361]	892.441	28.36	974307	647291
[L].QNTDGNNNEAWA.[K]	QNTDGNNNEAWA		P02788	P02788 [571-582]	1333.54	17.24	972416	487291
[K].SPIFGPEEVNSVEGNSV.[S]	SPIFGPEEVNSVEGNSV		P01833	P01833 [20-36]	1760.83	39.42	971397	829243
[R].TFGQGTKLEIK.[R]	TFGQGTKLEIK		P01593	P01593 [97-107]	1221.68	20.49	970389	970389
[N].WTEYQDPR.[T]	WTEYQDPR		Q08431	Q08431 [330-337]	1094.49	16.78	965471	179783
[M].SYLKNWGEG.[W]	SYLKNWGEG		P04745	P04745 [290-298]	1053.5	22.33	964150	214732
[T].FDKDTDSAIT.[N]	FDKDTDSAIT		P24821	P24821 [2125-2134]	1112.51	15.47	955639	310651
[R].PDIQYPDATDE.[D]	PDIQYPDATDE		P10451	P10451 [177-187]	1263.54	21.81	955162	279823
[V].FEDLSDEAERDEYE.[L]	FEDLSDEAERDEYE		P02788	P02788 [234-247]	1746.7	22.94	953642	365366
[L].KITGTMPPLP.[L]	KITGTMPPLP		P08571	P08571 [127-136]	1054.6	30.41	948582	78660.7
[F].ISADDVPGSNITGI.[C]	ISADDVPGSNITGI		P47989	P47989 [636-649]	1358.68	37.29	948229	184489
[N].FPPSQDASGDL.[Y]	FPPSQDASGDL		P01876; P01877	P01876 [53-63]	1133.51	24	946249	483242
[W].VRQAPGQGLEW.[M]	VRQAPGQGLEW		P01743	P01743 [56-66]	1240.64	26.19	945864	596277
[V].AWKADSSPVKAGVETTTPSKQSNN.[K]	AWKADSSPVKAGVETTTPSKQSNN		P0CG05	P0CG05 [41-64]	2503.24	17.61	942871	942871
[LF].SVVINQL.[CR]	SVVINQL		P02768; P01833	P02768 [478-484]	772.456	27.58	942082	556567
[L].EVDETYVPKEF.[N]	EVDETYVPKEF		P02768	P02768 [516-526]	1355.64	28.89	940540	264938
[V].LPVPQPEIMEVPKA.[K]	LPVPQPEIMEVPKA	1xOxidation [M9]	P05814	P05814 [91-104]	1563.85	31.13	940459	193954
[L].LKDIDGYGGIA.[L]	LKDIDGYGGIA		P00709	P00709 [31-41]	1121.58	22.59	939714	274402
[Y].KQIGLYPVLV.[I]	KQIGLYPVLV		P01833	P01833 [167-176]	1129.7	43.66	936429	795142
[S].RVEAEDVGV.[Y]	RVEAEDVGV		P01617	P01617 [82-90]	973.495	17.41	935142	573343
[Y].VTSAPMPEPQ.[A]	VTSAPMPEPQ		P01871	P01871 [378-387]	1056.5	18.27	933880	740257
[Q].YVPFPPFSDISNPTA.[H]	YVPFPPFSDISNPTA		P47710	P47710 [158-172]	1651.8	46.66	932653	194898
[F].LGLQHWVPE.[L]	LGLQHWVPE		Q08431	Q08431 [96-104]	1078.57	33.74	924425	180465
[L].QPLMQQVPQPIPQ.[T]	QPLMQQVPQPIPQ		P05814	P05814 [147-159]	1503.8	32.72	924369	241804
[G].EDEHQDKIYPSFQPQPL.[I]	EDEHQDKIYPSFQPQPL		P05814	P05814 [48-64]	2070.98	33.84	921315	217482
[S].SVLPGCAEPW.[N]	SVLPGCAEPW		P01876	P01876 [187-196]	1058.5	45.05	921079	252484
[L].TSLDLSDNPGLGER.[G]	TSLDLSDNPGLGER		P08571	P08571 [197-210]	1473.72	24.93	919636	155778
[R].TAHISGLPPSTDF.[I]	TAHISGLPPSTDF		P24821	P24821 [1492-1504]	1342.66	31.75	919396	202467
[Q].ELLLNPT.[H]	ELLLNPT		P05814	P05814 [201-207]	799.456	30.18	916449	320854
[E].EYMNGMN.[R]	EYMNGMN		P47710	P47710 [44-50]	858.312	16.32	910112	298058
[L].ESASGEKDLAPPSEPSES.[F]	ESASGEKDLAPPSEPSES	1xPhospho [S4]	P24821	P24821 [69-86]	1896.77	18.73	905443	260879
[A].ATELDTPKDL.[Q]	ATELDTPKDL		P24821	P24821 [982-991]	1102.56	22.02	903790	214755
[H].LLPPPSEELALNELVT.[L]	LLPPPSEELALNELVT		P01876; P01877	P01876 [232-247]	1734.95	46.31	901159	693394
[Y].ALTDLEPATE.[Y]	ALTDLEPATE		P24821	P24821 [1853-1862]	1059.52	24.73	898678	157977
[W].VRQAPGQGLEWMG.[I]	VRQAPGQGLEWMG		P01743	P01743 [56-68]	1428.71	30.41	897878	816369
[K].LGLLGDSVDI.[F]	LGLLGDSVDI		P19835	P19835 [40-49]	1001.55	46.07	897573	585960
[L].VKGFYPSD.[I]	VKGFYPSD		P01857	P01857 [252-259]	912.446	18.7	895326	404215
[F].NVELIQPG.[A]	NVELIQPG		P01024	P01024 [1468-1475]	869.473	24.03	889304	834306
[D].IQYPDATDEDITSH.[M]	IQYPDATDEDITSH	1xPhospho [T7]	P10451	P10451 [179-192]	1684.67	23.47	887811	167858
[Y].TTENSGYLEIT.[K]	TTENSGYLEIT		P19835	P19835 [512-522]	1227.57	27.55	885069	682901
[K].IYPSFQP.[Q]	IYPSFQP		P05814	P05814 [55-61]	851.43	30.35	884758	229512
[V].FDTGSSNLWVP.[S]	FDTGSSNLWVP		P07339	P07339 [96-106]	1222.57	44.75	878275	146701
[H].QDKIYPSFQPQ.[P]	QDKIYPSFQPQ		P05814	P05814 [52-62]	1350.67	23.84	877443	249008
[L].SSEVQIPDFDVDLG.[T]	SSEVQIPDFDVDLG		P04114	P04114 [1061-1074]	1520.71	46.2	875037	323323
[F].ILPDQDKMEEVE.[A]	ILPDQDKMEEVE		P01011	P01011 [277-288]	1445.68	22.16	873055	335769
[Q].DEPPQSPWD.[R]	DEPPQSPWD		P02647	P02647 [25-33]	1070.44	23.48	872742	304418
[T].GLDVQDMLPR.[N]	GLDVQDMLPR		P23280	P23280 [198-207]	1143.58	40.53	871962	176252
[R].LDVPVWDVEAT.[L]	LDVPVWDVEAT		O00391	O00391 [517-527]	1243.62	44.8	870497	106056
[L].SLTPEQWK.[S]	SLTPEQWK		P0CG05; P0CG04	P0CG05 [73-80]	988.51	21.07	869834	786593
[H].SWPWQVS.[L]	SWPWQVS		P00747	P00747 [591-597]	889.42	44.35	869509	46067.1
[W].EMPFDPQ.[D]	EMPFDPQ		P01011	P01011 [218-224]	863.36	26.28	868398	421282
[E].VEWDPLD.[I]	VEWDPLD		P24821	P24821 [730-736]	873.399	39.81	868296	148478
[K].ADSSPVKAGVETTTPS.[K]	ADSSPVKAGVETTTPS		P0CG05	P0CG05 [44-59]	1546.76	16.65	868140	868140
[T].GFAPDTDDLK.[Q]	GFAPDTDDLK		P01024	P01024 [1410-1419]	1078.51	19.18	864245	255950
[L].DVMQDHF.[S]	DVMQDHF		P10909	P10909 [174-180]	891.367	21.86	861383	254237
[V].VIIGGASNEAG.[K]	VIIGGASNEAG		P22897	P22897 [1054-1064]	987.511	17.85	858406	329057
[D].LSDEAERDEYE.[L]	LSDEAERDEYE		P02788	P02788 [237-247]	1355.56	15.09	857893	153170
[V].KHEDQQQGEDEHQDKIYPS.[F]	KHEDQQQGEDEHQDKIYPS		P05814	P05814 [40-58]	2311.02	9.2	856636	232415
[L].IYPFVEPI.[P]	IYPFVEPI		P05814	P05814 [65-72]	977.534	45.9	850746	367462
[S].VFIFPPSDEQ.[L]	VFIFPPSDEQ		P01834	P01834 [7-16]	1178.57	42.75	845977	474776
[S].LSSSEESITE.[Y]	LSSSEESITE	1xPhospho [S3]	P05814	P05814 [22-31]	1161.46	18.91	843294	243647
[T].HQIYPVTQPLAPV.[H]	HQIYPVTQPLAPV		P05814	P05814 [208-220]	1462.81	33.1	842411	346667
[W].LQGSQELPR.[E]	LQGSQELPR		P01876; P01877	P01876 [265-273]	1027.55	15.91	841286	602947
[W].QLFVNEESTIPRSPTVV.[K]	QLFVNEESTIPRSPTVV		P01833	P01833 [343-359]	1916.01	39.53	840255	759452
[W].NSGALTSGVHTFPAVLQSSGL.[Y]	NSGALTSGVHTFPAVLQSSGL		P01857	P01857 [42-62]	2043.05	44.76	838879	838879
[K].IWDVVEK.[A]	IWDVVEK		P01024	P01024 [616-622]	888.483	23.61	836940	584128
[W].KADSSPVKAGVETTTPSKQSNNKY.[A]	KADSSPVKAGVETTTPSKQSNNKY		P0CG05	P0CG05 [43-66]	2537.28	14.61	835196	294782
[R].VVLVAVDKGV.[F]	VVLVAVDKGV		P01024	P01024 [593-602]	998.624	26.52	831858	611811
[P].QPEIMEVPK.[A]	QPEIMEVPK		P05814	P05814 [95-103]	1070.56	21.96	831806	152180
[M].KGFEESEPVSGS.[F]	KGFEESEPVSGS		P24821	P24821 [1783-1794]	1252.57	16.01	830122	396310
[W].LQVDLGSS.[K]	LQVDLGSS		Q08431	Q08431 [289-296]	818.425	22.77	826461	148211
[R].VVESNFPNQEYT.[L]	VVESNFPNQEYT		P23280	P23280 [273-284]	1426.65	22.77	826395	118558
[E].YALTDLEPATE.[Y]	YALTDLEPATE		P24821	P24821 [1852-1862]	1222.58	34.5	825239	90187.2
[R].AAFGQGSGPIM.[L]	AAFGQGSGPIM		Q08380	Q08380 [77-87]	1035.49	29.82	823233	447276
[K].AAPSVTLFPPSSEELQAN.[K]	AAPSVTLFPPSSEELQAN		P0CG05	P0CG05 [5-22]	1857.92	43.48	818400	598956
[F].VIFGIQDGEQ.[R]	VIFGIQDGEQ		P01024	P01024 [271-280]	1105.55	32.38	817802	483958
[R].LQNPSESSEPIPLE.[S]	LQNPSESSEPIPLE		P47710	P47710 [27-40]	1539.75	29.78	817046	300162
[L].YNIDAKPEEPH.[F]	YNIDAKPEEPH		Q16651	Q16651 [205-215]	1312.62	16.53	816076	80313.5
[D].LQVLKPEPEL.[V]	LQVLKPEPEL		P01833	P01833 [235-244]	1165.68	31.37	814832	135984
[M].KSVIPSDGPSVA.[C]	KSVIPSDGPSVA		P02787	P02787 [46-57]	1156.62	20.07	814782	354482
[-].SYELTQPPSVSVSPGQTA.[R]	SYELTQPPSVSVSPGQTA		P01717	P01717 [1-18]	1847.9	31.28	814302	525402
[E].YALTDLEPA.[T]	YALTDLEPA		P24821	P24821 [1852-1860]	992.494	34.82	812986	180865
[K].SNESHDHMDDMDDEDDDDHVDS.[Q]	SNESHDHMDDMDDEDDDDHVDS		P10451	P10451 [78-99]	2574.84	15.61	812601	376760
[Y].DGKDYIEF.[N]	DGKDYIEF		P25311	P25311 [140-147]	986.447	31.4	811872	157679
[Y].VAVEER.[K]	VAVEER		P01833	P01833 [560-565]	702.378	8.71	811741	324705
[Y].VPITGGTPSM.[V]	VPITGGTPSM	1xOxidation [M10]	P24821	P24821 [1745-1754]	975.482	16.03	808183	155774
[-].SELTQDPAVSV.[A]	SELTQDPAVSV		P01714	P01714 [1-11]	1145.57	25.19	808033	507119
[R].VPGDQTSTIIQELEPGVE.[Y]	VPGDQTSTIIQELEPGVE		P24821	P24821 [670-687]	1911.95	44.76	807551	522778
[K].DLAPPSEPSE.[S]	DLAPPSEPSE		P24821	P24821 [76-85]	1041.47	19.27	806341	225141
[L].LQLGIEEA.[F]	LQLGIEEA		P01011	P01011 [329-336]	872.472	31.11	804699	380070
[R].RPDIQYPDATDEDITSH.[M]	RPDIQYPDATDEDITSH	2xPhospho [T10; S/T]	P10451	P10451 [176-192]	2132.82	24.33	803397	333825
[A].STEQAPELEN.[L]	STEQAPELEN		P24821	P24821 [1070-1079]	1117.5	16.21	800734	351394
[L].EVEPSDTIE.[N]	EVEPSDTIE		P62979	P62987 [16-24]	1018.46	18.19	798619	249194
[L].AFTQKTIDRLAGKPT.[H]	AFTQKTIDRLAGKPT		P01876	P01876 [323-337]	1646.92	20.25	796142	796142
[A].TWLNPDPSQK.[Q]	TWLNPDPSQK		P10451	P10451 [42-51]	1185.59	22.18	784516	160566
[R].FSGSGSGTDF.[T]	FSGSGSGTDF		P01620; P01617; P06312	P01620 [63-72]	961.39	20.1	783446	399844
[L].FKDSAIGF.[S]	FKDSAIGF		P02788	P02788 [319-326]	884.451	26.94	782412	142693
[Q].EYDESGPSIV.[H]	EYDESGPSIV		P60709	P60709 [361-370]	1095.48	23.8	782225	126264
[F].ATDFQDSAAA.[K]	ATDFQDSAAA		P01011	P01011 [167-176]	996.427	16.05	774510	273604
[Y].ETQAGEFPMVNNGH.[T]	ETQAGEFPMVNNGH		P23280	P23280 [72-85]	1530.66	22.76	773739	97336.9
[P].LMQQVPQPI.[P]	LMQQVPQPI		P05814	P05814 [149-157]	1053.58	28.6	767210	217029
[K].VKHEDQQQGEDE.[H]	VKHEDQQQGEDE		P05814	P05814 [39-50]	1441.62	5.03	765488	205647
[L].FILPDQDKM.[E]	FILPDQDKM		P01011	P01011 [276-284]	1106.56	31.37	761769	250951
[W].DKPEHIPDPDA.[K]	DKPEHIPDPDA		P27797	P27797 [237-247]	1233.57	15.93	761210	93516.5
[H].MESEELNGA.[Y]	MESEELNGA	1xPhospho [S3]; 1xOxidation [M1]	P10451	P10451 [193-201]	1075.36	14.99	759745	227603
[W].IFDVQNPQEV.[M]	IFDVQNPQEV		P16671	P16671 [67-76]	1188.59	30.8	759680	108761
[F].VIPDISEPGT.[W]	VIPDISEPGT		P0C0L4	P0C0L5 [203-212]	1027.53	25.34	759141	326753
[L].RTELRPGETLNVN.[F]	RTELRPGETLNVN		P01024	P01024 [462-474]	1498.8	19.63	756132	390421
[Y].GLRDQHMAIA.[W]	GLRDQHMAIA		P19835	P19835 [183-192]	1111.57	17.72	754350	598604
[D].IAQDAPDGL.[A]	IAQDAPDGL		P23280	P23280 [151-159]	899.447	20.99	753323	164642
[A].LENPQPHPGW.[Q]	LENPQPHPGW		P19835	P19835 [62-71]	1174.56	20.97	752991	172349
[R].QVREPGQDLVVLPL.[S]	QVREPGQDLVVLPL		P01024	P01024 [506-519]	1562.89	45.1	752901	752901
[L].TDLENLHLPLP.[L]	TDLENLHLPLP		P05814	P05814 [134-144]	1261.68	45.37	751127	357100
[Q].GEDEHQDKIYPSFQPQ.[P]	GEDEHQDKIYPSFQPQ		P05814	P05814 [47-62]	1917.86	22.36	748901	193990
[I].VDTGTSL.[M]	VDTGTSL		P07339	P07339 [294-300]	692.346	16.34	740903	129623
[R].IIRSSEDPNEDIVERN.[I]	IIRSSEDPNEDIVERN		P01591	P01591 [44-59]	1885.93	19.17	740817	584293
[K].ANPTVTLFPPSSEELQANKA.[T]	ANPTVTLFPPSSEELQANKA		P0CG04	P0CG04 [5-24]	2114.08	40.01	740140	673924
[R].QAPGQGLEWMG.[I]	QAPGQGLEWMG		P01743	P01743 [58-68]	1173.54	36.42	739858	418878
[L].LVDSEGWVKAQY.[E]	LVDSEGWVKAQY		P01833	P01833 [398-409]	1394.7	29.06	736489	244533
[H].SPAFQHPPTE.[F]	SPAFQHPPTE		P10909	P10909 [264-273]	1110.52	16.82	735510	252864
[D].LESASGEKDLAPPSEPSES.[F]	LESASGEKDLAPPSEPSES		P24821	P24821 [68-86]	1929.89	19.08	735435	128269
[S].RLSPDDADFV.[D]	RLSPDDADFV		P06858	P06858 [197-206]	1134.54	26.88	732380	36895.8
[L].SSNGLESLSPEF.[L]	SSNGLESLSPEF		P02750	P02750 [100-111]	1266.58	42.21	731166	70762.6
[K].GFGGVQVSPPNEN.[V]	GFGGVQVSPPNEN		P04745	P04745 [51-63]	1301.61	24.41	725483	93800.2
[F].VNEESTIPR.[S]	VNEESTIPR		P01833	P01833 [346-354]	1044.53	14.97	722314	563004
[V].NLFETPVEA.[Q]	NLFETPVEA		Q08431	Q08431 [194-202]	1019.5	37.82	722227	168869
[G].DIVMTQSPDSL.[A]	DIVMTQSPDSL		P06312	P06312 [21-31]	1205.57	31.74	721520	376192
[L].NWTGPPEPIEA.[A]	NWTGPPEPIEA		P02788	P02788 [156-166]	1210.57	32.36	715346	109503
[P].FFDPQIPK.[L]	FFDPQIPK		P05814	P05814 [125-132]	991.525	28.88	713420	128997
[K].SPTIPFFDPQIPK.[L]	SPTIPFFDPQIPK		P05814	P05814 [120-132]	1486.79	45.15	712132	436975
[E].FNYPLDNV.[H]	FNYPLDNV		P06858	P06858 [146-153]	981.468	37.88	710476	141231
[P].IPQQVVPYPQ.[R]	IPQQVVPYPQ		P05814	P05814 [179-188]	1168.64	26.37	707991	334380
[E].FTPLDPTQE.[P]	FTPLDPTQE		P47989	P47989 [201-209]	1047.5	27.46	707319	107766
[L].SVGVQLQDVPR.[G]	SVGVQLQDVPR		P0C0L4	P0C0L5 [38-48]	1197.66	23.55	707178	575945
[V].VTEDLPQLGDL.[A]	VTEDLPQLGDL		P24821	P24821 [1343-1353]	1199.62	44.35	706465	153470
[Q].SEEDMVGRPLPH.[L]	SEEDMVGRPLPH		P47989	P47989 [569-580]	1366.64	18.91	704898	251637
[M].QYVPFPPFSDI.[S]	QYVPFPPFSDI		P47710	P47710 [157-167]	1309.65	47.66	704263	97834.2
[R].KANDESNEHSDVIDSQELSKVSR.[E]	KANDESNEHSDVIDSQELSKVSR	3xPhospho [S10; S15; S19]	P10451	P10451 [249-271]	2827.12	19.81	703375	364937
[R].FKDLGEEN.[F]	FKDLGEEN		P02768	P02768 [35-42]	951.442	15.31	699484	220015
[R].IPIEDGSGEVVLS.[R]	IPIEDGSGEVVLS		P01024	P01024 [291-303]	1314.68	32.54	698657	364318
[D].PFIAIHAES.[K]	PFIAIHAES		P04745	P04745 [501-509]	984.515	24.77	695173	91537.5
[H].EDQQQGEDEHQDKIYPSFQPQPL.[I]	EDQQQGEDEHQDKIYPSFQPQPL		P05814	P05814 [42-64]	2756.24	33.35	694440	154155
[D].DITDDIM.[C]	DITDDIM		P00709	P00709 [103-109]	822.355	32.82	694305	159552
[L].FDHPESPTPNPTEPL.[F]	FDHPESPTPNPTEPL		P49327	P49327 [969-983]	1677.78	25.01	692114	177199
[K].DDPDAPLQPV.[T]	DDPDAPLQPV		P0C0L4	P0C0L5 [1429-1438]	1066.51	23.83	691218	561844
[A].WTPSSNDDNPWIQV.[N]	WTPSSNDDNPWIQV		Q08431	Q08431 [117-130]	1658.74	44.64	690768	159479
[Q].TLALPPQPL.[W]	TLALPPQPL		P05814	P05814 [160-168]	949.572	39.78	690206	266271
[V].FQDEGAEPL.[K]	FQDEGAEPL		P0C0L4	P0C0L5 [1156-1164]	1005.45	22.45	689857	330754
[V].PVIDGDFIPADPI.[N]	PVIDGDFIPADPI		P19835	P19835 [309-321]	1368.7	45.63	678388	196182
[L].AEIDGIEL.[T]	AEIDGIEL		P24821	P24821 [828-835]	859.441	43.54	678004	423393
[R].ASHEEVEGLVEK.[I]	ASHEEVEGLVEK		Q08380	Q08380 [334-345]	1326.65	17.53	676050	432577
[L].LQDEFPGIPSPL.[D]	LQDEFPGIPSPL		P02790	P02790 [132-143]	1312.68	46.14	673174	330055
[L].NLVTRADEGW.[Y]	NLVTRADEGW		P01833	P01833 [532-541]	1160.57	26.47	672258	539696
[R].AVDIPGLE.[A]	AVDIPGLE		P24821	P24821 [1401-1408]	813.435	34.95	670927	287168
[K].ANPTVTLFPPSSEELQANKATLV.[C]	ANPTVTLFPPSSEELQANKATLV		P0CG04	P0CG04 [5-27]	2427.28	44.5	669943	598087
[T].YKIPAFG.[S]	YKIPAFG		P47989	P47989 [1228-1234]	795.44	29.11	664450	155879
[R].RPDIQYPDATDEDITSH.[M]	RPDIQYPDATDEDITSH		P10451	P10451 [176-192]	1972.89	21.55	662492	442409
[E].DPFIAIHAES.[K]	DPFIAIHAES		P04745	P04745 [500-509]	1099.54	28.52	661514	257628
[L].KPEPELVYEDL.[R]	KPEPELVYEDL		P01833	P01833 [239-249]	1331.67	36.27	660143	433503
[V].VVDVSHEDPEVK.[F]	VVDVSHEDPEVK		P01857	P01857 [146-157]	1352.67	15.94	658924	549702
[L].PVPQPEIMEVPK.[A]	PVPQPEIMEVPK		P05814	P05814 [92-103]	1363.73	30.38	655803	319477
[Q].YLPNSHPPTVV.[R]	YLPNSHPPTVV		P07498	P07498 [98-108]	1223.64	22.17	655652	240836
[K].VFDEFKPL.[V]	VFDEFKPL		P02768	P02768 [397-404]	994.524	37.86	655092	465331
[I].YPVTQPLAPV.[H]	YPVTQPLAPV		P05814	P05814 [211-220]	1084.6	31.74	654306	213789
[R].RPDIQYPDATDEDITS.[H]	RPDIQYPDATDEDITS	1xPhospho [T10]	P10451	P10451 [176-191]	1915.8	25.82	653646	237474
[L].VQGFFPQEP.[L]	VQGFFPQEP		P01876; P01877	P01876 [28-36]	1048.51	36.07	651304	387601
[Y].LGPQYVAGIT.[N]	LGPQYVAGIT		P02788	P02788 [682-691]	1018.56	29.91	647984	406912
[K].WEMPFDPQ.[D]	WEMPFDPQ		P01011	P01011 [217-224]	1049.44	44.47	646630	271748
[R].DLTATEVQ.[S]	DLTATEVQ		P24821	P24821 [1892-1899]	876.431	17.97	645948	290429
[H].LLPPPSEELALNELV.[T]	LLPPPSEELALNELV		P01876; P01877	P01876 [232-246]	1633.9	46.89	645463	564563
[G].DQTVSDNELQEM.[S]	DQTVSDNELQEM		P10909	P10909 [23-34]	1408.59	25.53	635304	566349
[A].DMQASGEAV.[Y]	DMQASGEAV		P47989	P47989 [584-592]	907.383	15.34	634551	175299
[W].YQQKPGQAPVLV.[I]	YQQKPGQAPVLV		P80748	P80748 [34-45]	1327.74	22.2	634364	634363
[G].ADLSGVTEEAPL.[K]	ADLSGVTEEAPL		P01009	P01009 [340-351]	1201.59	32.38	633735	172670
[E].IENAFQGNL.[C]	IENAFQGNL		P47989	P47989 [139-147]	1005.5	29.03	629985	98503.7
[G].VQLQDVPR.[G]	VQLQDVPR		P0C0L4	P0C0L5 [41-48]	954.537	18.68	626444	258081
[K].SSQVPQS.[R]	SSQVPQS		P00709	P00709 [82-88]	732.352	8.45	623810	87481.8
[T].YLPAPEGL.[K]	YLPAPEGL		P24821	P24821 [711-718]	859.456	32.69	622925	132313
[Y].TIEILKVE.[-]	TIEILKVE		P12273	P12273 [139-146]	944.566	30.91	618716	580773
[M].QYVPFPPFSDISNPTA.[H]	QYVPFPPFSDISNPTA		P47710	P47710 [157-172]	1779.86	46.53	616796	113585
[D].FVIPDISEPGT.[W]	FVIPDISEPGT		P0C0L4	P0C0L5 [202-212]	1174.6	43.67	611616	291901
[L].VGPFYPQ.[L]	VGPFYPQ		Q99541	Q99541 [402-408]	807.404	25.71	611248	83712.4
[F].EQLELRPV.[L]	EQLELRPV		P0C0L4	P0C0L5 [847-854]	983.552	24.22	610963	384196
[L].LVSDATPDGF.[R]	LVSDATPDGF		P24821	P24821 [1627-1636]	1021.48	26.26	610490	217565
[G].NLKPDTEYEVS.[L]	NLKPDTEYEVS		P24821	P24821 [862-872]	1294.62	18.64	606879	301940
[K].TTPPVLDSDGS.[F]	TTPPVLDSDGS		P01857	P01857 [276-286]	1088.51	19.52	604690	365662
[K].VQWKVDNALQSGNSQESVTEQDSKDST.[Y]	VQWKVDNALQSGNSQESVTEQDSKDST		P01834	P01834 [38-64]	2980.38	23.95	603314	603314
[L].LTDGDPTVGETNPR.[S]	LTDGDPTVGETNPR		Q14624	Q14624 [383-396]	1471.7	16.02	599995	147072
[H].GNVAEGETKPDPDVTER.[C]	GNVAEGETKPDPDVTER		P02790	P02790 [33-49]	1813.86	16.79	599929	402745
[W].ASRQEPSQGTTTFAVTSIL.[R]	ASRQEPSQGTTTFAVTSIL		P01876; P01877	P01876 [280-298]	1994.02	44.15	596820	596820
[L].SITTDFIPS.[F]	SITTDFIPS		P01024	P01024 [520-528]	980.494	37.56	596674	342835
[W].LQGSQELPREK.[Y]	LQGSQELPREK		P01876; P01877	P01876 [265-275]	1284.69	14.11	595668	525808
[H].QIYPVTQPLAPV.[H]	QIYPVTQPLAPV		P05814	P05814 [209-220]	1325.75	40.51	595241	150998
[LM].SGGTTMYPGIA.[D]	SGGTTMYPGIA		P60709	P60709 [300-310]	1054.49	25.29	595196	122409
[A].TWLNPDPS.[Q]	TWLNPDPS		P10451	P10451 [42-49]	929.436	27.07	594917	324745
[A].TVSSPGSVPEVQD.[I]	TVSSPGSVPEVQD		P0C0L4	P0C0L5 [408-420]	1301.62	19.84	593806	240098
[Y].YVPNSYPY.[Y]	YVPNSYPY		P07498	P07498 [50-57]	1002.46	22.73	590115	103972
[G].FFPQEPL.[S]	FFPQEPL		P01876; P01877	P01876 [31-37]	877.445	39.69	589852	383788
[K].SGQSEDRQPVPGQQMT.[L]	SGQSEDRQPVPGQQMT		P01024	P01024 [567-582]	1744.79	15.9	587629	519401
[R].FEDGVLDPDYPR.[N]	FEDGVLDPDYPR		P04004	P04004 [230-241]	1422.65	29.19	583524	187291
[K].DLQVSET.[A]	DLQVSET		P24821	P24821 [990-996]	791.378	16.21	582651	238337
[E].VVTEDLPQLG.[D]	VVTEDLPQLG		P24821	P24821 [1342-1351]	1070.57	33.05	580984	359332
[S].ALLQDNIADA.[V]	ALLQDNIADA		P61626	P61626 [101-110]	1043.54	29.2	579886	178687
[W].KVDNALQSGNSQESVTEQDSKD.[S]	KVDNALQSGNSQESVTEQDSKD		P01834	P01834 [41-62]	2379.09	15.28	579850	371383
[L].ISDFYPGAVTV.[A]	ISDFYPGAVTV		P0CG05; P0CG04	P0CG05 [30-40]	1168.59	41.27	579521	379112
[V].DETYVPKE.[F]	DETYVPKE		P02768	P02768 [518-525]	980.457	15.72	579221	303107
[K].EIPLSPMGEDSAPR.[D]	EIPLSPMGEDSAPR	1xOxidation [M7]	Q13410	Q13410 [494-507]	1514.72	20.69	578978	244525
[F].FLPDEGKL.[Q]	FLPDEGKL		P01009	P01009 [277-284]	918.493	24.77	577622	81097.5
[L].FILPDQDKMEE.[V]	FILPDQDKMEE	1xOxidation [M9]	P01011	P01011 [276-286]	1380.64	23.79	576488	299240
[S].SIFQDDFVIPDISEPGT.[W]	SIFQDDFVIPDISEPGT		P0C0L4	P0C0L5 [196-212]	1879.9	47.1	575751	476168
[Y].VPFPPFSDISNPTA.[H]	VPFPPFSDISNPTA		P47710	P47710 [159-172]	1488.74	45.56	575228	112695
[D].IQYPDATDEDITSH.[M]	IQYPDATDEDITSH		P10451	P10451 [179-192]	1604.71	21.52	572057	199336
[E].VHLLPPPSEEL.[A]	VHLLPPPSEEL		P01876; P01877	P01876 [230-240]	1230.67	35.04	570677	537507
[H].SDVIDSQELS.[K]	SDVIDSQELS	1xPhospho [S6]	P10451	P10451 [258-267]	1172.47	24.08	569078	154522
[W].YYPQIM.[Q]	YYPQIM		P47710	P47710 [151-156]	814.38	31.02	566628	149393
[L].TLNLVTRADEG.[W]	TLNLVTRADEG		P01833	P01833 [530-540]	1188.62	21.49	564293	564293
[H].TSDSDVPSGVTEV.[V]	TSDSDVPSGVTEV		P10909	P10909 [393-405]	1292.59	22.46	562079	83227.6
[D].LESASGEKDLAPPSEPSES.[F]	LESASGEKDLAPPSEPSES	1xPhospho [S]	P24821	P24821 [68-86]	2009.86	20.32	558013	246544
[R].NFPPSQDASGDLYTTSSQLTLPA.[T]	NFPPSQDASGDLYTTSSQLTLPA		P01876; P01877	P01876 [52-74]	2410.14	44.76	557004	541029
[L].NPQDKDGSFSVV.[I]	NPQDKDGSFSVV		P01833	P01833 [300-311]	1292.61	21.85	556740	481392
[Y].KLRPVAAEVY.[G]	KLRPVAAEVY		P02788	P02788 [92-101]	1145.67	19.11	554062	143871
[T].KALENPQPHPGWQGT.[L]	KALENPQPHPGWQGT		P19835	P19835 [60-74]	1659.82	18.05	553974	255529
[D].EHQDKIYPSFQPQP.[L]	EHQDKIYPSFQPQP		P05814	P05814 [50-63]	1713.82	23.13	552847	222854
[L].TQPPSVSGTPGQ.[R]	TQPPSVSGTPGQ		P01700	P01700 [5-16]	1155.56	15.29	552447	234955
[K].FLDDDITDDI.[M]	FLDDDITDDI		P00709	P00709 [99-108]	1181.52	44.04	549553	378849
[W].TPSSNDDNPWIQV.[N]	TPSSNDDNPWIQV		Q08431	Q08431 [118-130]	1472.67	39.81	548637	229580
[R].VIISAPSADAPM.[F]	VIISAPSADAPM		P04406	P04406 [119-130]	1171.6	30.93	547899	72423.1
[L].TYNPDESSKPNM.[I]	TYNPDESSKPNM		P02679	P02679 [93-104]	1382.59	15.82	547506	193016
[F].VNEESTIPRSPTVVK.[G]	VNEESTIPRSPTVVK		P01833	P01833 [346-360]	1655.9	18.91	543674	190405
[H].EFDFIHDVN.[K]	EFDFIHDVN		Q08431	Q08431 [168-176]	1135.51	36.16	543491	75016.4
[H].LLPPPSEELALN.[E]	LLPPPSEELALN		P01876; P01877	P01876 [232-243]	1292.71	38.74	541718	411247
[L].FVNEESTIPRSPTVV.[K]	FVNEESTIPRSPTVV		P01833	P01833 [345-359]	1674.87	28.08	539203	390139
[G].LLYPFPK.[D]	LLYPFPK		P24821	P24821 [1976-1982]	877.518	33.93	538772	100273
[L].ISDFYPGAVTVA.[W]	ISDFYPGAVTVA		P0CG05; P0CG04	P0CG05 [30-41]	1239.63	38.83	537871	168770
[W].NSGALTSGVHTFPAV.[L]	NSGALTSGVHTFPAV		P01857	P01857 [42-56]	1457.74	32.65	534192	486937
[F].TTALDGPSGLVTA.[N]	TTALDGPSGLVTA		P24821	P24821 [1796-1808]	1202.63	30.46	533248	135869
[K].GFYPSDIA.[V]	GFYPSDIA		P01857	P01857 [254-261]	869.404	30.87	532375	298008
[R].ILLNPQDKDGSFSV.[V]	ILLNPQDKDGSFSV		P01833	P01833 [297-310]	1532.8	36.49	528331	519858
[V].TLDPDTAHPHL.[F]	TLDPDTAHPHL		Q13410	Q13410 [306-316]	1216.6	19.82	527332	137237
[F].STFDKDTDSAIT.[N]	STFDKDTDSAIT		P24821	P24821 [2123-2134]	1300.59	18.06	527307	326175
[R].KANDESNEHSDVIDSQEL.[S]	KANDESNEHSDVIDSQEL	2xPhospho [S10; S]	P10451	P10451 [249-266]	2189.83	22.59	527065	144357
[E].PEILPDGDHDL.[K]	PEILPDGDHDL		P04075	P04075 [189-199]	1220.58	28.33	526337	73063.8
[N].IENPEGIPV.[K]	IENPEGIPV		P01024	P01024 [167-175]	967.509	28.02	524127	156034
[Y].ETQAGEFPM.[V]	ETQAGEFPM		P23280	P23280 [72-80]	1009.43	26.91	523672	230219
[V].FIFPPSDEQ.[L]	FIFPPSDEQ		P01834	P01834 [8-16]	1079.5	36.14	522277	289176
[K].VLQIEKEGA.[I]	VLQIEKEGA		P0C0L4	P0C0L5 [930-938]	986.552	17.91	521498	521498
[K].VLPIPQQVVPYPQ.[R]	VLPIPQQVVPYPQ		P05814	P05814 [176-188]	1477.84	43.7	521451	276093
[I].YPSFQPQ.[P]	YPSFQPQ		P05814	P05814 [56-62]	866.404	21.93	520980	119597
[E].SLSSSEESITE.[Y]	SLSSSEESITE		P05814	P05814 [21-31]	1168.52	19.29	520549	324445
[W].EVEVGDRTDW.[A]	EVEVGDRTDW		Q13410	Q13410 [361-370]	1205.54	22.45	520443	51653.5
[R].RVDTVDPPYPR.[S]	RVDTVDPPYPR		P04004	P04004 [453-463]	1314.68	18.22	516503	84040.1
[Y].SEGALDEAHWPQ.[H]	SEGALDEAHWPQ		P23280	P23280 [26-37]	1339.59	25.72	516336	146092
[L].AFTQKTIDRL.[A]	AFTQKTIDRL		P01876	P01876 [323-332]	1192.67	20.86	514606	325924
[K].EVIFSDITENSATVS.[W]	EVIFSDITENSATVS		P24821	P24821 [1715-1729]	1611.77	39.82	514280	111621
[E].HSDVIDSQELSKVSR.[E]	HSDVIDSQELSKVSR	2xPhospho [S11; S]	P10451	P10451 [257-271]	1859.79	19.89	513141	156288
[K].KGGSFQLNELQGL.[K]	KGGSFQLNELQGL		P02788	P02788 [119-131]	1390.73	42.56	512573	452045
[K].TITLEVEPSDTIENV.[K]	TITLEVEPSDTIENV		P62979	P62987 [12-26]	1659.83	43.38	512048	102147
[K].FRRPDIQYPDAT.[D]	FRRPDIQYPDAT		P10451	P10451 [174-185]	1478.74	21.41	511562	185959
[-].DIQMTQSPSS.[L]	DIQMTQSPSS		P01593	P01593 [1-10]	1093.48	17.19	510362	510362
[L].AEIDGIELTYGIK.[D]	AEIDGIELTYGIK		P24821	P24821 [828-840]	1421.75	42.68	509769	318818
[F].RPEVHLLPPPSEEL.[A]	RPEVHLLPPPSEEL		P01876; P01877	P01876 [227-240]	1612.87	34.26	507973	493096
[Y].KSYDIAQDAPDGL.[A]	KSYDIAQDAPDGL		P23280	P23280 [147-159]	1392.66	27.48	506860	76569.1
[P].PGPRGEPGPVGDQGERGEPGA.[E]	PGPRGEPGPVGDQGERGEPGA		Q17RW2	Q17RW2 [1203-1223]	2015.95	17.77	505737	41086.3
[Y].VLPSFEVIVEPTEK.[F]	VLPSFEVIVEPTEK		P01024	P01024 [228-241]	1586.87	43.91	505041	505041
[R].MNENSHVQVP.[F]	MNENSHVQVP		P47710	P47710 [126-135]	1154.53	18.18	503205	396853
[K].NVPLPVIAELPPK.[V]	NVPLPVIAELPPK		P01871	P01871 [100-112]	1386.84	43.96	502792	502792
[L].QPLMQQVPQPIPQT.[L]	QPLMQQVPQPIPQT		P05814	P05814 [147-160]	1604.85	33.17	499342	228409
[M].LDVMQDHFS.[R]	LDVMQDHFS		P10909	P10909 [173-181]	1091.48	25.86	494152	210785
[V].QWKVDNALQSGNSQESVTEQDSKDST.[Y]	QWKVDNALQSGNSQESVTEQDSKDST		P01834	P01834 [39-64]	2881.31	21.97	493822	384847
[E].HSDVIDSQEL.[S]	HSDVIDSQEL	1xPhospho [S7]	P10451	P10451 [257-266]	1222.5	23.19	492737	117616
[T].LFPPSSEELQANKATLV.[C]	LFPPSSEELQANKATLV		P0CG05; P0CG04	P0CG05 [11-27]	1843.98	38.8	491584	415038
[V].DSEGWVKAQYEGRLS.[L]	DSEGWVKAQYEGRLS		P01833	P01833 [400-414]	1724.82	25.43	491556	465105
[E].VDETYVPKEF.[N]	VDETYVPKEF		P02768	P02768 [517-526]	1226.59	27.36	489070	169114
[R].ESGVPDRFSGSGSGTDF.[T]	ESGVPDRFSGSGSGTDF		P06312	P06312 [81-97]	1701.74	24.89	488660	346863
[T].AKEPEIGNL.[N]	AKEPEIGNL		P24821	P24821 [1436-1444]	970.52	22.44	487834	80719.1
[F].ISADDVPGSNITG.[I]	ISADDVPGSNITG		P47989	P47989 [636-648]	1245.6	23.19	487670	80728.3
[G].EDEHQDKIYPSFQPQP.[L]	EDEHQDKIYPSFQPQP		P05814	P05814 [48-63]	1957.89	24.36	486812	267400
[K].TTPPVLDSDGSF.[F]	TTPPVLDSDGSF		P01857	P01857 [276-287]	1235.58	33.03	485624	200750
[Q].QQGEDEHQDKIYPSFQPQPL.[I]	QQGEDEHQDKIYPSFQPQPL		P05814	P05814 [45-64]	2384.12	32.78	484336	182977
[Q].AGEFPMVNNGH.[T]	AGEFPMVNNGH		P23280	P23280 [75-85]	1172.52	21.93	484316	62243.6
[H].SDVIDSQEL.[S]	SDVIDSQEL	1xPhospho [S6]	P10451	P10451 [258-266]	1085.44	28.29	482819	110825
[Q].TLALPPQP.[L]	TLALPPQP		P05814	P05814 [160-167]	836.488	26.41	482743	212004
[Y].VPFPPFSDI.[S]	VPFPPFSDI		P47710	P47710 [159-167]	1018.52	46.94	482624	131116
[W].KADSSPVKAGVETTTPSKQSNNKYAASS.[Y]	KADSSPVKAGVETTTPSKQSNNKYAASS		P0CG05	P0CG05 [43-70]	2853.42	14.51	479528	479528
[L].PELPDVEL.[P]	PELPDVEL		P02774	P02774 [321-328]	911.472	42.65	479487	70645.8
[L].RKSEEEVA.[A]	RKSEEEVA		P02788	P02788 [351-358]	947.479	5.12	478391	129092
[G].DFIPADPIN.[L]	DFIPADPIN		P19835	P19835 [314-322]	1001.49	36.33	476021	122693
[A].VVLPVPQPEIMEVP.[K]	VVLPVPQPEIMEVP	1xOxidation [M11]	P05814	P05814 [89-102]	1562.85	44.41	475264	94556.8
[K].LGLLGDSVD.[I]	LGLLGDSVD		P19835	P19835 [40-48]	888.467	36.31	474279	114503
[I].LSIGGGAGEIDLQ.[I]	LSIGGGAGEIDLQ	1xAcetyl [N-Term]	P50135	P50135 [57-69]	1271.65	35.12	474014	29461.4
[F].SGSGSGTDFTLTIS.[RS]	SGSGSGTDFTLTIS		P01620; P06312	P01620 [64-77]	1329.62	36.31	473540	333033
[I].SELQLSVSAGSPHPA.[I]	SELQLSVSAGSPHPA		P0C0L4	P0C0L5 [442-456]	1479.74	24.21	471265	386758
[L].TEEVPDMGNL.[T]	TEEVPDMGNL		P24821	P24821 [1253-1262]	1104.49	32.16	470492	64653.2
[S].YELTQPPSVSVSPGQTA.[R]	YELTQPPSVSVSPGQTA		P01717	P01717 [2-18]	1760.87	30.76	470107	260703
[E].VELDNQIVT.[A]	VELDNQIVT		P01591	P01591 [99-107]	1030.54	24.9	469221	73153.6
[R].SPTVVKGVAGGSVAV.[L]	SPTVVKGVAGGSVAV		P01833	P01833 [355-369]	1327.76	22.99	468736	468736
[R].IYVDAVINH.[M]	IYVDAVINH		P04745	P04745 [108-116]	1043.55	24.25	466769	90216.3
[Q].IYPVTQPLAPV.[H]	IYPVTQPLAPV		P05814	P05814 [210-220]	1197.69	39.34	466461	103211
[S].LDLSDNPGLGE.[R]	LDLSDNPGLGE		P08571	P08571 [199-209]	1129.54	28.02	465849	39487.9
[K].FLDDDITDD.[I]	FLDDDITDD		P00709	P00709 [99-107]	1068.44	28.6	465326	242034
[L].SAEASTGETPNLGEVV.[V]	SAEASTGETPNLGEVV		P24821	P24821 [1157-1172]	1560.74	32.66	465127	183644
[L].EVSQGPGLL.[N]	EVSQGPGLL		P01833	P01833 [126-134]	899.483	27.05	464640	68523.8
[W].KVDNALQSGNSQESVTEQD.[S]	KVDNALQSGNSQESVTEQD		P01834	P01834 [41-59]	2048.94	16.35	464401	292096
[L].SSTSHVPEVDPGSAEL.[Q]	SSTSHVPEVDPGSAEL		P49327	P49327 [1478-1493]	1611.75	25.36	463904	142089
[R].AISQSGVALSPW.[V]	AISQSGVALSPW		P19835	P19835 [236-247]	1215.64	41.64	461881	389591
[E].LVYEDLRGSVT.[F]	LVYEDLRGSVT		P01833	P01833 [244-254]	1251.66	25.34	461303	332855
[V].NLAWDNEM.[R]	NLAWDNEM		P24821	P24821 [640-647]	992.414	33.63	459694	238973
[F].DIPKSVRPNDEVTAV.[L]	DIPKSVRPNDEVTAV		P12273	P12273 [41-55]	1639.86	21.06	457712	384136
[G].SFTTALDGPSGL.[V]	SFTTALDGPSGL		P24821	P24821 [1794-1805]	1165.57	40.89	457075	61219.5
[L].EELHYSPEGSL.[H]	EELHYSPEGSL		P47989	P47989 [1210-1220]	1260.57	23.68	455837	130040
[L].MQQVPQPIP.[Q]	MQQVPQPIP	1xOxidation [M1]	P05814	P05814 [150-158]	1053.54	22.47	455554	198968
[Q].VLLPSKDVM.[Q]	VLLPSKDVM		P01871	P01871 [71-79]	1001.57	27.01	455084	260571
[V].SIPIIIPQ.[T]	SIPIIIPQ		P0C0L4	P0C0L5 [432-439]	880.55	42.83	454621	235455
[Y].SIGNLKPDT.[E]	SIGNLKPDT		P24821	P24821 [859-867]	944.505	17.5	449872	449872
[K].EVIFSDITENSATV.[S]	EVIFSDITENSATV		P24821	P24821 [1715-1728]	1524.74	43.11	449453	103076
[R].TELRPGETLNVN.[F]	TELRPGETLNVN		P01024	P01024 [463-474]	1342.7	20.87	447497	447497
[F].DIAVDGEPLG.[R]	DIAVDGEPLG		P62937	P62937 [9-18]	985.484	28.64	446344	81995.9
[T].TRLDAPSQIEV.[K]	TRLDAPSQIEV		P24821	P24821 [801-811]	1228.65	25.51	445527	61331.8
[Y].VSGFHPSDIE.[V]	VSGFHPSDIE		P61769	P61769 [47-56]	1087.51	20.72	444258	444258
[V].ESGGGLVQPGGS.[L]	ESGGGLVQPGGS		P01766	P01766 [6-17]	1044.5	15.67	443076	315522
[R].QEPSQGTTTFAVTSIL.[R]	QEPSQGTTTFAVTSIL		P01876; P01877	P01876 [283-298]	1679.85	45.77	441422	382435
[L].NPQDKDGSFSVVITGL.[R]	NPQDKDGSFSVVITGL		P01833	P01833 [300-315]	1676.85	44.12	441289	137223
[F].EDLSDEAERDEY.[E]	EDLSDEAERDEY		P02788	P02788 [235-246]	1470.59	19.28	439671	242303
[L].DLSDNPGLGE.[R]	DLSDNPGLGE		P08571	P08571 [200-209]	1016.45	20.81	438118	105448
[F].RRPDIQYPDATDEDITSH.[M]	RRPDIQYPDATDEDITSH	1xPhospho [T11]	P10451	P10451 [175-192]	2208.96	21.02	437398	135334
[V].YEDLRGSVTF.[H]	YEDLRGSVTF		P01833	P01833 [246-255]	1186.57	28.89	437267	225350
[Y].ETQAGEFPMVN.[N]	ETQAGEFPMVN		P23280	P23280 [72-82]	1222.54	28.65	433572	72756.6
[V].LPVPQPEIMEVPK.[A]	LPVPQPEIMEVPK		P05814	P05814 [91-103]	1476.81	38.44	431268	363036
[E].DEHQDKIYPSFQPQP.[L]	DEHQDKIYPSFQPQP		P05814	P05814 [49-63]	1828.85	24.95	431227	261961
[-].EIVLTQSPGTLSLSPGERAT.[L]	EIVLTQSPGTLSLSPGERAT		P01620	P01620 [1-20]	2056.09	36.58	431199	431199
[P].FPPFSDISNPT.[A]	FPPFSDISNPT		P47710	P47710 [161-171]	1221.58	43.35	429888	226311
[L].TIKESDWL.[G]	TIKESDWL		P01871	P01871 [183-190]	991.509	30.35	426974	318821
[K].YLGPQYVAGIT.[N]	YLGPQYVAGIT		P02788	P02788 [681-691]	1181.62	36.85	424568	252423
[D].LNAPSDWDSRGKDSYETS.[Q]	LNAPSDWDSRGKDSYETS	2xPhospho [S9; S14]	P10451	P10451 [211-228]	2187.83	21.71	423966	98240.9
[L].AGLEYPMLH.[Y]	AGLEYPMLH		P19835	P19835 [295-303]	1030.5	30.31	419119	204870
[R].IYVDAVINHM.[C]	IYVDAVINHM		P04745	P04745 [108-117]	1174.59	37.55	417683	39555.5
[K].TVVDFETDVL.[F]	TVVDFETDVL		P19835	P19835 [403-412]	1137.57	44.34	417481	196124
[K].AAPSVTLFPPSSEELQANKAT.[L]	AAPSVTLFPPSSEELQANKAT		P0CG05	P0CG05 [5-25]	2158.1	38.53	415282	376401
[Y].AATSQVLLPSKDVM.[Q]	AATSQVLLPSKDVM		P01871	P01871 [66-79]	1459.78	30.8	413307	368752
[L].SKEIPLSPM.[G]	SKEIPLSPM		Q13410	Q13410 [492-500]	1001.53	26.67	412153	56455.2
[W].VGPPNDNGVT.[K]	VGPPNDNGVT		P04745	P04745 [373-382]	969.464	15.47	411362	110332
[L].ISSEGYVSS.[K]	ISSEGYVSS		P01833	P01833 [68-76]	928.426	15.96	410939	302077
[L].NWTGPPEPIEAA.[V]	NWTGPPEPIEAA		P02788	P02788 [156-167]	1281.61	32.61	410745	63994.2
[V].DNALQSGNSQESVTEQDSKDST.[Y]	DNALQSGNSQESVTEQDSKDST		P01834	P01834 [43-64]	2340.01	16.85	410378	284224
[V].SLEVSQGPGL.[L]	SLEVSQGPGL		P01833	P01833 [124-133]	986.515	25.9	410305	298374
[W].KVDNALQSGNSQESVTEQDSKDSTYS.[L]	KVDNALQSGNSQESVTEQDSKDSTYS		P01834	P01834 [41-66]	2817.27	17.4	408331	242643
[Y].KQIGLYPVL.[V]	KQIGLYPVL		P01833	P01833 [167-175]	1030.63	39.84	406694	330536
[L].TGLDVQDMLPR.[N]	TGLDVQDMLPR		P23280	P23280 [197-207]	1244.63	41.53	405543	79665.4
[K].VDNALQSGNSQESV.[T]	VDNALQSGNSQESV		P01834	P01834 [42-55]	1447.67	17.72	404947	334366
[F].EDLSDEAERDEYEL.[L]	EDLSDEAERDEYEL		P02788	P02788 [235-248]	1712.71	29.17	404420	217822
[L].VESGGGLVQPG.[G]	VESGGGLVQPG		P01766	P01766 [5-15]	999.511	17.78	403385	272075
[R].LSLHRPALED.[L]	LSLHRPALED		P01876; P01877	P01876 [127-136]	1150.62	20.26	403383	290750
[E].IKIIEGEPNL.[K]	IKIIEGEPNL		P01833	P01833 [455-464]	1125.65	31.17	402006	37993.5
[W].GFMPSDRALV.[F]	GFMPSDRALV		P04745	P04745 [300-309]	1092.55	32.13	401906	284801
[A].TYLPAPEGL.[K]	TYLPAPEGL		P24821	P24821 [710-718]	960.504	36.79	399978	74281.1
[L].VLKGEADA.[M]	VLKGEADA		P02788	P02788 [403-410]	802.431	7.58	397681	60299.6
[W].NVPIGTLRPF.[L]	NVPIGTLRPF		P02788	P02788 [145-154]	1113.64	38.71	394291	314953
[A].LEVDETYVPK.[E]	LEVDETYVPK		P02768	P02768 [515-524]	1192.61	22.49	393085	287696
[Y].VPFPPFS.[D]	VPFPPFS		P47710	P47710 [159-165]	790.413	43.6	391037	145026
[K].SVIPSDGPSV.[A]	SVIPSDGPSV		P02787	P02787 [47-56]	957.489	23.91	389934	209785
[L].SVTWSESGQGVTAR.[N]	SVTWSESGQGVTAR		P01876	P01876 [38-51]	1464.71	19.66	388875	234257
[M].QYVPFPPF.[S]	QYVPFPPF		P47710	P47710 [157-164]	994.503	46.57	387235	77508.1
[K].DFDFVPPV.[V]	DFDFVPPV		P01024	P01024 [1245-1252]	935.451	46.03	385961	317816
[H].LIDIGVAG.[F]	LIDIGVAG		P04745	P04745 [201-208]	757.445	31.51	382135	79665.8
[K].HEDQQQGEDEHQDKIYPSFQPQP.[L]	HEDQQQGEDEHQDKIYPSFQPQP		P05814	P05814 [41-63]	2780.22	22.26	381563	209025
[F].LSTGDANLPGNY.[G]	LSTGDANLPGNY		P19835	P19835 [171-182]	1221.57	24.3	375471	91014.4
[V].FSNGADLSGVTEEAPL.[K]	FSNGADLSGVTEEAPL		P01009	P01009 [336-351]	1606.76	38.43	373530	132056
[R].EATEYEIEL.[Y]	EATEYEIEL		P24821	P24821 [1682-1690]	1096.5	38.71	371293	204868
[V].VLPVPQPEIME.[V]	VLPVPQPEIME	1xOxidation [M10]	P05814	P05814 [90-100]	1267.66	33.11	371164	68329.8
[T].ASDPLDTLGSEGALSPGGVA.[S]	ASDPLDTLGSEGALSPGGVA		P0C0L4	P0C0L5 [982-1001]	1813.88	43.86	370882	166665
[L].QTDQPIYNPGQ.[R]	QTDQPIYNPGQ		P0C0L4	P0C0L5 [144-154]	1260.59	18.71	369718	267090
[Y].GIYVINQ.[A]	GIYVINQ		P15291	P15291 [210-216]	806.441	27	368599	215091
[Y].TESWAQDPSQENK.[K]	TESWAQDPSQENK		P19835	P19835 [388-400]	1519.67	16.09	366182	318555
[L].ESREEYMNGM.[N]	ESREEYMNGM	1xPhospho [S2]; 1xOxidation [M7]	P47710	P47710 [40-49]	1341.45	14.89	366111	63674.2
[Y].FEWSDGTPVT.[F]	FEWSDGTPVT		P22897	P22897 [435-444]	1138.51	32.79	365226	117195
[K].VKHEDQQQGEDEHQ.[D]	VKHEDQQQGEDEHQ		P05814	P05814 [39-52]	1706.74	4.92	361143	83300.8
[W].NSGALTSGVHTFPAVLQSSG.[L]	NSGALTSGVHTFPAVLQSSG		P01857	P01857 [42-61]	1929.97	38.03	360158	354737
[R].HQQTVTIPPKSSLSVPY.[V]	HQQTVTIPPKSSLSVPY		P01024	P01024 [882-898]	1882.01	28.29	359836	356907
[L].NWLPGSPSAEPG.[K]	NWLPGSPSAEPG		P22897	P22897 [302-313]	1211.57	30.33	357994	126618
[T].LFPPSSEELQANK.[A]	LFPPSSEELQANK		P0CG05; P0CG04	P0CG05 [11-23]	1459.74	23.66	357839	297723
[A].FATDFQDSAAA.[K]	FATDFQDSAAA		P01011	P01011 [166-176]	1143.5	23.86	356750	198211
[A].WTPSSNDDNPWIQ.[V]	WTPSSNDDNPWIQ		Q08431	Q08431 [117-129]	1559.68	37.62	354523	32698.4
[H].QDKIYPSFQP.[Q]	QDKIYPSFQP		P05814	P05814 [52-61]	1222.61	27.22	354436	325793
[K].ITGTMPPLPLE.[A]	ITGTMPPLPLE		P08571	P08571 [128-138]	1168.63	43.69	352082	49274.4
[R].IIRSSEDPNEDIVE.[R]	IIRSSEDPNEDIVE		P01591	P01591 [44-57]	1615.78	20.94	348977	298223
[Y].SLADLSPST.[H]	SLADLSPST		P24821	P24821 [1941-1949]	890.447	23.4	348623	232957
[L].NIWVPQ.[G]	NIWVPQ		P19835	P19835 [104-109]	756.404	29.32	347325	177244
[Y].ANAADIDYIAGT.[N]	ANAADIDYIAGT		P19835	P19835 [325-336]	1194.56	27.73	345926	198970
[K].SGNTFRPEVH.[L]	SGNTFRPEVH		P01876; P01877	P01876 [222-231]	1143.55	14.97	345658	217025
[R].RPDIQYPDATDED.[I]	RPDIQYPDATDED		P10451	P10451 [176-188]	1534.67	19.57	344941	158355
[K].FRRPDIQYPDATDEDITSH.[M]	FRRPDIQYPDATDEDITSH	2xPhospho [T12; S/T]	P10451	P10451 [174-192]	2435.99	25.96	344213	111424
[A].LEDLLLGSEA.[N]	LEDLLLGSEA		P01876; P01877	P01876 [134-143]	1059.56	41.72	342558	111771
[L].TVLHQDWLNGKE.[Y]	TVLHQDWLNGKE		P01857	P01857 [190-201]	1439.73	23.99	342243	342243
[L].DLGENQLETLPPDL.[L]	DLGENQLETLPPDL		P02750	P02750 [194-207]	1553.77	45.32	341843	120700
[Y].VLPNFEV.[K]	VLPNFEV		P0C0L4	P0C0L5 [237-243]	817.445	40.42	341629	309543
[N].DDNPWIQVN.[L]	DDNPWIQVN		Q08431	Q08431 [123-131]	1100.5	33.76	341364	44734.5
[L].QGSQELPREKYLT.[W]	QGSQELPREKYLT		P01876; P01877	P01876 [266-278]	1548.8	19.13	340370	206620
[L].KRIPIEDGSGEVVLS.[R]	KRIPIEDGSGEVVLS		P01024	P01024 [289-303]	1598.87	23.23	339544	277206
[R].SMQGGLVGN.[D]	SMQGGLVGN		P0C0L4	P0C0L5 [1127-1135]	862.409	17.73	339153	216785
[C].MVGHEALPL.[A]	MVGHEALPL		P01876; P01877	P01876 [314-322]	966.508	27.48	338273	323888
[R].NFPPSQDASGDLYT.[T]	NFPPSQDASGDLYT		P01876; P01877	P01876 [52-65]	1511.66	31.96	336021	147723
[P].LMQQVPQPIPQ.[T]	LMQQVPQPIPQ		P05814	P05814 [149-159]	1278.69	26.71	334542	100888
[W].VVVAVPPQDTAPY.[S]	VVVAVPPQDTAPY		P25311	P25311 [266-278]	1355.72	29.01	333071	333071
[A].QDFLPDSIT.[L]	QDFLPDSIT		P01871	P01871 [31-39]	1035.5	38.63	332835	325680
[N].AWTPSSNDDNPW.[I]	AWTPSSNDDNPW		Q08431	Q08431 [116-127]	1389.57	34.75	332438	55835.3
[R].DGFFGNPR.[K]	DGFFGNPR		P01871	P01871 [121-128]	909.421	22.49	330131	277086
[L].NWTGPPEPI.[E]	NWTGPPEPI		P02788	P02788 [156-164]	1010.49	33.24	329002	152389
[K].SNESHDHMDDMDDEDDDDHVDS.[Q]	SNESHDHMDDMDDEDDDDHVDS	1xOxidation [M]	P10451	P10451 [78-99]	2590.83	8.93	328800	127383
[K].ANPTVTLFPPSSEEL.[Q]	ANPTVTLFPPSSEEL		P0CG04	P0CG04 [5-19]	1601.81	45.15	327956	194184
[C].LISDFYPGAVT.[V]	LISDFYPGAVT		P0CG05; P0CG04	P0CG05 [29-39]	1182.6	41.26	326527	207430
[A].SVGGNIITASPI.[S]	SVGGNIITASPI		P47989	P47989 [347-358]	1128.63	37.17	326389	75597
[E].DLSDEAERDEYEL.[L]	DLSDEAERDEYEL		P02788	P02788 [236-248]	1583.67	29.51	323930	254952
[N].ALQSGNSQESVTEQDSKDST.[Y]	ALQSGNSQESVTEQDSKDST		P01834	P01834 [45-64]	2110.94	13.23	321289	202798
[H].TFPAVLQSSGL.[Y]	TFPAVLQSSGL		P01857	P01857 [52-62]	1119.6	44.6	318806	208990
[F].IFPPSDEQLKSGTASV.[V]	IFPPSDEQLKSGTASV		P01834	P01834 [9-24]	1675.85	26.95	317617	278075
[I].LLNPQDKDGSFSVV.[I]	LLNPQDKDGSFSVV		P01833	P01833 [298-311]	1518.78	32.45	317068	317068
[R].ITYVPITGGTP.[S]	ITYVPITGGTP		P24821	P24821 [1742-1752]	1118.61	31.92	315209	315209
[F].TTDLDSPR.[D]	TTDLDSPR		P24821	P24821 [1884-1891]	904.437	15.04	314344	86978.7
[F].RVPGDQTSTIIQELEPGVE.[Y]	RVPGDQTSTIIQELEPGVE		P24821	P24821 [669-687]	2068.06	43.48	313779	263409
[D].FKQETLPSKSNESHDH.[M]	FKQETLPSKSNESHDH	3xPhospho [S10; S13; T/S]	P10451	P10451 [69-84]	2123.79	14.02	312931	89233.1
[K].LVLSSEKTVL.[T]	LVLSSEKTVL		P01024	P01024 [67-76]	1088.66	28.63	311454	149269
[R].TLEIPGNSDPN.[M]	TLEIPGNSDPN		P0C0L4	P0C0L5 [957-967]	1156.55	22.11	310713	263601
[T].GFAPDTDDL.[K]	GFAPDTDDL		P01024	P01024 [1410-1418]	950.41	28.78	308851	308851
[Y].ASPDVSEPIDGLNPN.[E]	ASPDVSEPIDGLNPN		P16671	P16671 [349-363]	1524.72	27.92	305352	36364.1
[-].SELTQDPAVSVALGQTV.[R]	SELTQDPAVSVALGQTV		P01714	P01714 [1-17]	1714.89	43.06	304429	127990
[R].GVTQDFSTTPL.[S]	GVTQDFSTTPL		P24821	P24821 [1237-1247]	1165.57	33.31	299311	180901
[K].HMWPGDI.[K]	HMWPGDI		P04745	P04745 [216-222]	855.382	30.2	297997	18305.3
[Q].GEDEHQDKIYPS.[F]	GEDEHQDKIYPS		P05814	P05814 [47-58]	1417.62	13.97	297902	40040.8
[L].SWTADEGVFDN.[F]	SWTADEGVFDN		P24821	P24821 [1639-1649]	1240.51	32.94	296595	152492
[E].FDFIHD.[V]	FDFIHD		Q08431	Q08431 [169-174]	793.352	28.36	295632	271633
[K].NADLQVLKPEPELVYEDLRGSVT.[F]	NADLQVLKPEPELVYEDLRGSVT		P01833	P01833 [232-254]	2585.35	44.81	295313	295313
[K].NADLQVLKPEPELVYEDL.[R]	NADLQVLKPEPELVYEDL		P01833	P01833 [232-249]	2085.08	45.27	294697	294697
[T].KSPIFGPEEVNSVEGNSVSI.[T]	KSPIFGPEEVNSVEGNSVSI		P01833	P01833 [19-38]	2089.04	41.3	293887	276593
[V].LPVPQPEIMEVP.[K]	LPVPQPEIMEVP	1xOxidation [M9]	P05814	P05814 [91-102]	1364.71	38.31	293393	109932
[-].YVLTQPPSVS.[V]	YVLTQPPSVS		P80748	P80748 [1-10]	1090.58	25.87	292983	76281.6
[V].AQDLNAPSDWDS.[R]	AQDLNAPSDWDS		P10451	P10451 [208-219]	1318.55	24.17	290725	153686
[Q].DDFVIPDISEPGT.[W]	DDFVIPDISEPGT		P0C0L4	P0C0L5 [200-212]	1404.65	44.62	290696	199492
[R].RPDIQYPDATDEDITS.[H]	RPDIQYPDATDEDITS		P10451	P10451 [176-191]	1835.83	23.82	287072	121403
[L].DGNPFLVPGTALPH.[E]	DGNPFLVPGTALPH		P08571	P08571 [327-340]	1434.74	43.12	286234	36293.6
[F].SISNSAEDPFIAIHAESKL.[-]	SISNSAEDPFIAIHAESKL		P04745	P04745 [493-511]	2029.02	42.02	282988	70281.5
[T].RLDAPSQIEVKDVTDTT.[A]	RLDAPSQIEVKDVTDTT		P24821	P24821 [802-818]	1887.97	24.36	281773	221547
[S].TVFEDLSDEAERDE.[Y]	TVFEDLSDEAERDE		P02788	P02788 [232-245]	1654.71	33.99	281275	281275
[F].AVTSILRVAAED.[W]	AVTSILRVAAED		P01876; P01877	P01876 [293-304]	1244.68	31.23	280814	280814
[F].VTNPDGSPAYRVPVAVQGEDTVQSLTQGDGVA.[K]	VTNPDGSPAYRVPVAVQGEDTVQSLTQGDGVA		P01024	P01024 [376-407]	3227.58	43.27	280417	280417
[S].TVTPTLPGETLT.[Y]	TVTPTLPGETLT		P00450	P00450 [845-856]	1229.66	32.83	280221	66058.8
[R].FGLLDEDGK.[K]	FGLLDEDGK		P0C0L4	P0C0L5 [284-292]	993.489	26.91	279689	146106
[R].QTGLAPGQEYEI.[S]	QTGLAPGQEYEI		P24821	P24821 [770-781]	1305.63	30.15	278907	155226
[G].DIVMTQSPDSLAVSLGER.[A]	DIVMTQSPDSLAVSLGER		P06312	P06312 [21-38]	1917.96	42.53	278902	109026
[F].KQETLPSKSNESHDHM.[D]	KQETLPSKSNESHDHM	3xPhospho [S7; S9; S12]	P10451	P10451 [70-85]	2107.76	14.28	278891	89253.2
[R].VFAILENK.[K]	VFAILENK		P24821	P24821 [692-699]	933.54	29.28	277266	196399
[Y].ILTVPGHLDEMQ.[L]	ILTVPGHLDEMQ		P0C0L4	P0C0L5 [252-263]	1352.69	31.79	276814	196386
[W].LQGSQELPREKYL.[T]	LQGSQELPREKYL		P01876; P01877	P01876 [265-277]	1560.84	22.02	276295	276295
[F].TVNFGDTEEA.[K]	TVNFGDTEEA		P01009	P01009 [168-177]	1082.46	20.66	275548	185679
[K].EVIFSDITENSA.[T]	EVIFSDITENSA		P24821	P24821 [1715-1726]	1324.63	37.45	275302	58955.7
[Q].PLMQQVPQPIPQT.[L]	PLMQQVPQPIPQT		P05814	P05814 [148-160]	1476.79	32.63	275220	115811
[K].IGGIGTVPVG.[R]	IGGIGTVPVG		P68104	P68104 [256-265]	869.509	28.09	275089	46108.8
[F].DVIGPPEPIL.[A]	DVIGPPEPIL		Q13410	Q13410 [30-39]	1049.59	44.21	273248	121274
[Q].LGYEPNDEL.[W]	LGYEPNDEL		P22897	P22897 [414-422]	1049.48	27.11	273196	96412.1
[L].PELPDVELPTN.[K]	PELPDVELPTN		P02774	P02774 [321-331]	1223.62	38.66	271654	83089.6
[Y].AATSQVLLPSKDV.[M]	AATSQVLLPSKDV		P01871	P01871 [66-78]	1328.74	24.74	271190	271190
[Q].DLNAPSDWDSRGKDSYETS.[Q]	DLNAPSDWDSRGKDSYETS	2xPhospho [S10; S15]	P10451	P10451 [210-228]	2302.85	24.35	271052	133177
[V].AQDLNAPSDWDSR.[G]	AQDLNAPSDWDSR	1xPhospho [S12]	P10451	P10451 [208-220]	1554.62	21.5	270883	209398
[L].LFSVVINQ.[L]	LFSVVINQ		P01833	P01833 [202-209]	919.525	37.61	270845	77068.9
[W].ASRQEPSQGTTT.[F]	ASRQEPSQGTTT		P01876; P01877	P01876 [280-291]	1262.6	5.46	270522	256924
[K].GPSVFPLAPSS.[K]	GPSVFPLAPSS		P01857	P01857 [5-15]	1058.55	38.51	269937	90111.2
[F].YNMNDGSDIYT.[F]	YNMNDGSDIYT		Q13410	Q13410 [436-446]	1292.51	22.84	269765	81092.1
[R].IRLDIQGTGQLL.[F]	IRLDIQGTGQLL		P01833	P01833 [191-202]	1326.77	43.4	267887	117649
[Y].GGAFLMGSGHGAN.[F]	GGAFLMGSGHGAN		P19835	P19835 [126-138]	1175.53	20.7	267881	267881
[E].AIVDGGINPDSL.[R]	AIVDGGINPDSL		P49327	P49327 [89-100]	1170.6	36.13	267878	54246.1
[Q].AGEFPMVNNGHTV.[Q]	AGEFPMVNNGHTV		P23280	P23280 [75-87]	1372.63	26.5	267436	77772.5
[M].WFDPAQGNPNEE.[V]	WFDPAQGNPNEE		P15328	P15328 [213-224]	1403.59	27.76	267102	46215.1
[K].EVIFSDITENS.[A]	EVIFSDITENS		P24821	P24821 [1715-1725]	1253.59	36.58	266811	79604.7
[E].DQQQGEDEHQDKIYPSFQPQPL.[I]	DQQQGEDEHQDKIYPSFQPQPL		P05814	P05814 [43-64]	2627.2	34.07	266608	77052.1
[R].TFGQGTKLEI.[K]	TFGQGTKLEI		P01593	P01593 [97-106]	1093.59	30.33	265222	243827
[R].GSFEFPVGDAV.[S]	GSFEFPVGDAV		P0C0L4	P0C0L5 [917-927]	1124.53	44.39	264416	160436
[Y].KTTPPVLDSDGSFF.[L]	KTTPPVLDSDGSFF		P01857	P01857 [275-288]	1510.74	42.17	263775	78628.5
[D].ISNPTAHE.[N]	ISNPTAHE		P47710	P47710 [167-174]	868.416	8.53	263597	57672.1
[C].PAWIPELNS.[V]	PAWIPELNS		P47989	P47989 [281-289]	1026.53	43.42	263520	77202.6
[Y].LSLTPEQWK.[S]	LSLTPEQWK		P0CG05; P0CG04	P0CG05 [72-80]	1101.59	30.68	262542	205329
[Q].LNELQGL.[K]	LNELQGL		P02788	P02788 [125-131]	786.436	29.68	262415	70845.6
[V].AQDLNAPSDW.[D]	AQDLNAPSDW		P10451	P10451 [208-217]	1116.5	27.75	261931	113440
[S].TKSPIFGPEEVNSVEGN.[S]	TKSPIFGPEEVNSVEGN		P01833	P01833 [18-34]	1803.88	28.51	260878	86105.1
[Y].LISSIPLQGAFN.[Y]	LISSIPLQGAFN		P12273	P12273 [72-83]	1259.7	44.27	260131	260131
[V].YVDLKPPFGGSAPSE.[R]	YVDLKPPFGGSAPSE		P04217	P04217 [376-390]	1563.77	33.74	259945	86424.4
[Y].TTSSQLTLPAT.[Q]	TTSSQLTLPAT		P01876; P01877	P01876 [65-75]	1119.59	25.24	259895	259895
[A].RETIESLSSSEESITEYK.[Q]	RETIESLSSSEESITEYK	2xPhospho [S9; S]	P05814	P05814 [16-33]	2247.93	29.65	258023	19651.6
[Y].LGPQYVAGITNL.[K]	LGPQYVAGITNL		P02788	P02788 [682-693]	1245.68	43.77	256232	142900
[A].QPAVVLPVPQPEIMEVPK.[A]	QPAVVLPVPQPEIMEVPK	1xOxidation [M14]	P05814	P05814 [86-103]	1987.09	42.63	255795	202246
[R].TWYPEVPK.[C]	TWYPEVPK		P04003	P04003 [530-537]	1019.52	26.74	255792	255792
[Q].DLNAPSDWDS.[R]	DLNAPSDWDS		P10451	P10451 [210-219]	1119.46	26.77	254989	213187
[L].VKDYFPEPV.[T]	VKDYFPEPV		P01857	P01857 [29-37]	1093.56	29.76	253378	115144
[Y].AASSYLSLTPEQW.[K]	AASSYLSLTPEQW		P0CG05; P0CG04	P0CG05 [67-79]	1452.7	45.19	253303	253303
[K].DLLLPQPDL.[R]	DLLLPQPDL		P02750	P02750 [230-238]	1023.57	45.26	253297	155633
[R].TTIDLTEDENQYSIGNLKPDTEYEVS.[L]	TTIDLTEDENQYSIGNLKPDTEYEVS		P24821	P24821 [847-872]	2974.37	43.08	252396	252396
[F].TVILNQLTS.[R]	TVILNQLTS		P01833	P01833 [425-433]	988.567	31.42	251934	251934
[Y].VSATVILHSGSDMVQAER.[S]	VSATVILHSGSDMVQAER		P01024	P01024 [326-343]	1899.96	29.76	251857	102349
[L].TLNLVTRADEGW.[Y]	TLNLVTRADEGW		P01833	P01833 [530-541]	1374.7	38.31	249532	156765
[K].QLESNKIPEL.[D]	QLESNKIPEL		P07602	P07602 [153-162]	1170.64	28.1	249384	26977.3
[M].SLYPSLEDL.[K]	SLYPSLEDL	1xAcetyl [N-Term]	O00560	O00560 [2-10]	1078.53	47.87	249244	62822.9
[S].KAEFQDALEK.[L]	KAEFQDALEK		P0C0L4	P0C0L5 [316-325]	1178.61	18.14	249079	198932
[A].WTPSSNDDNPWI.[Q]	WTPSSNDDNPWI		Q08431	Q08431 [117-128]	1431.62	43.05	247498	32993.7
[F].SVVITGLRKEDA.[G]	SVVITGLRKEDA		P01833	P01833 [309-320]	1287.73	18.57	245995	232771
[C].HPNSPLDEENLT.[Q]	HPNSPLDEENLT		P01011	P01011 [24-35]	1365.63	21.71	245252	245252
[F].LDDDITDDI.[M]	LDDDITDDI		P00709	P00709 [100-108]	1034.45	35.57	242476	56324.4
[F].KQETLPSKSNESHDHMDDM.[D]	KQETLPSKSNESHDHMDDM	3xPhospho [S7; S9; S12]	P10451	P10451 [70-88]	2468.85	17.78	241678	128660
[Q].DIQQNTDGSGQV.[S]	DIQQNTDGSGQV		P0C0L4	P0C0L5 [420-431]	1261.57	14.21	241040	174707
[Y].LLVYESVDGTV.[K]	LLVYESVDGTV		P24821	P24821 [1918-1928]	1194.63	37.76	240472	82602.5
[K].KLGLLGDSVDI.[F]	KLGLLGDSVDI		P19835	P19835 [39-49]	1129.65	43.53	237879	237879
[Y].LVVYTPTHEGGLEM.[Q]	LVVYTPTHEGGLEM		P24821	P24821 [653-666]	1545.76	35.75	237868	142577
[A].AIIESPGGEMEEAELT.[S]	AIIESPGGEMEEAELT		P0C0L4	P0C0L5 [343-358]	1675.77	35.8	237709	119512
[V].EVVTEDLPQLGDL.[A]	EVVTEDLPQLGDL		P24821	P24821 [1341-1353]	1427.73	45.59	237654	83134.8
[W].RWVDIALE.[C]	RWVDIALE		P04745	P04745 [35-42]	1001.54	36.19	237169	22957.5
[Y].VIVPLKTGLQEVEV.[K]	VIVPLKTGLQEVEV		P01024	P01024 [899-912]	1523.9	43.29	236192	236192
[T].KSPIFGPEEVNSVEGNSVS.[I]	KSPIFGPEEVNSVEGNSVS		P01833	P01833 [19-37]	1975.96	29.9	235765	223529
[G].DIVMTQSPDSLAV.[S]	DIVMTQSPDSLAV		P06312	P06312 [21-33]	1375.68	38.88	235543	200893
[W].ASLGQPNWD.[M]	ASLGQPNWD		P02750	P02750 [281-289]	987.453	24.24	234979	68706.9
[F].KPLAEIDGIELT.[Y]	KPLAEIDGIELT		P24821	P24821 [825-836]	1298.72	41.01	234943	75288.1
[V].KDYFPEPV.[T]	KDYFPEPV		P01857	P01857 [30-37]	994.488	27.72	234575	181335
[L].KDSQIADIL.[S]	KDSQIADIL		O00560	O00560 [250-258]	1002.55	31.15	234571	35160.9
[V].IDGDFIPADPIN.[L]	IDGDFIPADPIN		P19835	P19835 [311-322]	1286.63	41.68	234269	38202.2
[K].SGNTFRPEVHLLPPPSEELA.[L]	SGNTFRPEVHLLPPPSEELA		P01876; P01877	P01876 [222-241]	2190.12	41.93	233160	220737
[Y].ETQAGEFPMVNNGHTV.[Q]	ETQAGEFPMVNNGHTV		P23280	P23280 [72-87]	1730.78	27.55	232547	78588.4
[T].IPFFDPQ.[I]	IPFFDPQ		P05814	P05814 [123-129]	863.43	43.1	232086	77532.3
[R].RGDMSSNPAKETFTTGLDAPR.[N]	RGDMSSNPAKETFTTGLDAPR		P24821	P24821 [877-897]	2251.08	22.02	231842	231842
[Q].VLKPEPELVYEDL.[R]	VLKPEPELVYEDL		P01833	P01833 [237-249]	1543.83	43.41	230144	230144
[W].LWNVEDLKEPPKNGIST.[K]	LWNVEDLKEPPKNGIST		P01024	P01024 [772-788]	1940.01	35.39	230123	121908
[S].VTWSESGQGVTA.[R]	VTWSESGQGVTA		P01876	P01876 [39-50]	1221.57	22.37	230119	93306.4
[Y].SLSSVVTVPSSSL.[G]	SLSSVVTVPSSSL		P01857	P01857 [64-76]	1262.68	39.34	229955	83524.7
[K].QTDEIKDT.[R]	QTDEIKDT		P47710	P47710 [60-67]	949.447	8.36	229847	73092.5
[W].KADSSPVKAGVETTTPSKQSNN.[K]	KADSSPVKAGVETTTPSKQSNN		P0CG05	P0CG05 [43-64]	2246.13	9.31	228255	177395
[D].LENLHLPL.[P]	LENLHLPL		P05814	P05814 [136-143]	948.551	42.21	227593	60511.7
[A].LNELVTLT.[C]	LNELVTLT		P01876; P01877	P01876 [242-249]	902.519	34.82	227426	227426
[Y].AVFESDVNL.[K]	AVFESDVNL		P16671	P16671 [277-285]	993.489	35.5	227054	29498.6
[W].KVDNALQSGNSQESVTEQDSKDSTYSLSSTLT.[L]	KVDNALQSGNSQESVTEQDSKDSTYSLSSTLT		P01834	P01834 [41-72]	3419.59	28.02	226879	172835
[K].WQEEMEL.[Y]	WQEEMEL	1xOxidation [M5]	P02647	P02647 [132-138]	980.403	23.56	225063	79472.5
[K].TIDRLAGKPTHVNVSV.[V]	TIDRLAGKPTHVNVSV		P01876	P01876 [328-343]	1706.95	20.56	224457	224457
[Q].DLNAPSDWDSR.[G]	DLNAPSDWDSR		P10451	P10451 [210-220]	1275.56	21.98	224405	88719.8
[K].QIGLYPVLV.[I]	QIGLYPVLV		P01833	P01833 [168-176]	1001.6	48.25	222019	188277
[K].VKHEDQQQ.[G]	VKHEDQQQ		P05814	P05814 [39-46]	1011.49	4.6	221983	33340.4
[E].EIENAFQGNL.[C]	EIENAFQGNL		P47989	P47989 [138-147]	1134.54	33	221071	53655.2
[G].FTWSDGSPVS.[Y]	FTWSDGSPVS		P22897	P22897 [726-735]	1082.48	30.44	220776	75531.3
[D].SIDSNDSDDVDDTDDSHQSDESHH.[S]	SIDSNDSDDVDDTDDSHQSDESHH	1xPhospho [S19]	P10451	P10451 [102-125]	2751.94	9.3	220485	54769.3
[K].EVIFSDITENSAT.[V]	EVIFSDITENSAT		P24821	P24821 [1715-1727]	1425.67	36.95	220292	77118.6
[P].AVVLPVPQPEIM.[E]	AVVLPVPQPEIM	1xOxidation [M12]	P05814	P05814 [88-99]	1308.72	42.74	220235	39065.4
[L].VKDYFPEPVT.[V]	VKDYFPEPVT		P01857	P01857 [29-38]	1194.6	27.71	219979	73453.1
[V].EVEWDPLD.[I]	EVEWDPLD		P24821	P24821 [729-736]	1002.44	42.05	219807	33676.5
[Y].VIVPLKTGLQEVEVK.[A]	VIVPLKTGLQEVEVK		P01024	P01024 [899-913]	1652	35	219624	109356
[Y].LFIQTDKTI.[Y]	LFIQTDKTI		P01024	P01024 [130-138]	1078.61	29.35	218630	79040.6
[F].VIEEVPGEL.[M]	VIEEVPGEL		P06396	P06396 [680-688]	984.525	30.43	217362	44561
[T].DLENLHLPLP.[L]	DLENLHLPLP		P05814	P05814 [135-144]	1160.63	45.7	215102	109713
[F].SVVITGL.[R]	SVVITGL		P01833	P01833 [309-315]	688.424	33.31	214391	177747
[Y].YDGKDYIEF.[N]	YDGKDYIEF		P25311	P25311 [139-147]	1149.51	32.92	212784	212784
[Q].VLKPEPELVYEDLRGSVT.[F]	VLKPEPELVYEDLRGSVT		P01833	P01833 [237-254]	2044.1	43.33	211856	156786
[W].KVDNALQSGNSQESVTEQDSKDSTYSLSSTLTLSKADY.[E]	KVDNALQSGNSQESVTEQDSKDSTYSLSSTLTLSKADY		P01834	P01834 [41-78]	4096.93	37.31	210983	210983
[K].ADLSGITGA.[R]	ADLSGITGA		P01011	P01011 [341-349]	804.41	22.34	210597	138006
[Y].VIVPLKTGLQEVEVKAAV.[Y]	VIVPLKTGLQEVEVKAAV		P01024	P01024 [899-916]	1893.14	42.77	210457	210457
[Y].FKPGMPFD.[L]	FKPGMPFD		P01024	P01024 [364-371]	938.444	29.59	210004	37693.1
[F].GPEEVNSVEGNSV.[S]	GPEEVNSVEGNSV		P01833	P01833 [24-36]	1316.6	19.17	209859	209859
[R].EKYLTW.[A]	EKYLTW		P01876; P01877	P01876 [274-279]	839.43	29	209049	79796.6
[Y].RVPVAVQGEDTVQSLTQGDGVA.[K]	RVPVAVQGEDTVQSLTQGDGVA		P01024	P01024 [386-407]	2226.14	35.85	208786	208786
[S].TKSPIFGPEEVNSVEGNSV.[S]	TKSPIFGPEEVNSVEGNSV		P01833	P01833 [18-36]	1989.98	33.56	208686	200229
[A].KVEQAVETEPEPEL.[R]	KVEQAVETEPEPEL		P02649	P02649 [19-32]	1597.8	22.87	208270	60435.4
[L].AENAGDVAFVKDVTV.[L]	AENAGDVAFVKDVTV		P02788	P02788 [555-569]	1534.77	36.27	207609	51221
[M].WFDPAQGNPNE.[E]	WFDPAQGNPNE		P15328	P15328 [213-223]	1274.54	27.28	206266	30002.7
[L].PELPDVELPT.[N]	PELPDVELPT		P02774	P02774 [321-330]	1109.57	42.58	203949	120284
[R].NFPPSQDASGDLYTTSSQ.[L]	NFPPSQDASGDLYTTSSQ		P01876; P01877	P01876 [52-69]	1914.84	30.75	202975	163816
[P].TIPFFDPQIPK.[L]	TIPFFDPQIPK		P05814	P05814 [122-132]	1302.71	44.52	202850	84529.8
[L].SLHRPALEDL.[L]	SLHRPALEDL		P01876; P01877	P01876 [128-137]	1150.62	23.59	202502	202502
[L].PELPDVELPTNK.[D]	PELPDVELPTNK		P02774	P02774 [321-332]	1351.71	32.35	202451	107896
[R].RAISQSGVALSPW.[V]	RAISQSGVALSPW		P19835	P19835 [235-247]	1371.74	34.3	202260	202260
[K].LTDLENL.[H]	LTDLENL		P05814	P05814 [133-139]	817.43	31.51	201954	84108.7
[R].GGPEVQQVPAGERPL.[W]	GGPEVQQVPAGERPL		P49327	P49327 [478-492]	1533.8	21.44	201519	71044.4
[D].NEILLENQL.[F]	NEILLENQL		Q9Y4K3	Q9Y4K3 [109-117]	1085.58	42.79	201356	37753.7
[Y].MELSSLRSEDTAV.[Y]	MELSSLRSEDTAV		P01743	P01743 [100-112]	1437.69	26.56	201048	201048
[L].SITVRTKKQELSEAEQAT.[R]	SITVRTKKQELSEAEQAT		P01024	P01024 [421-438]	2019.07	16.35	200230	200230
[Y].LSLTPEQWKS.[H]	LSLTPEQWKS		P0CG05; P0CG04	P0CG05 [72-81]	1188.63	30.08	199701	139816
[P].DIQYPDATDEDITSH.[M]	DIQYPDATDEDITSH		P10451	P10451 [178-192]	1719.73	23.12	199289	84458.1
[I].IESPGGEMEEAELT.[S]	IESPGGEMEEAELT		P0C0L4	P0C0L5 [345-358]	1491.65	28.04	198691	183256
[A].EIVTEAEPEVDNL.[L]	EIVTEAEPEVDNL		P24821	P24821 [1614-1626]	1457.7	33.8	197510	27306.5
[V].VRRPNLHPS.[F]	VRRPNLHPS		P07498	P07498 [108-116]	1075.61	8.49	197228	62582.3
[W].ASLGQPNWDM.[R]	ASLGQPNWDM		P02750	P02750 [281-290]	1118.49	34.91	196928	46896.2
[K].DYFPEPV.[T]	DYFPEPV		P01857	P01857 [31-37]	866.393	34.83	196857	130401
[W].TYSEGALDEAHWPQ.[H]	TYSEGALDEAHWPQ		P23280	P23280 [24-37]	1603.7	29.74	196857	43510.6
[K].SGTSASLAISGL.[R]	SGTSASLAISGL		P01700	P01700 [69-80]	1063.56	36.71	196846	111865
[L].FKPEEFTPLDPT.[Q]	FKPEEFTPLDPT		P47989	P47989 [196-207]	1420.7	35.71	196763	37354.3
[A].VDIPGLKA.[A]	VDIPGLKA		P24821	P24821 [1129-1136]	812.488	26.82	196620	33441.7
[S].AEDPFIAIH.[A]	AEDPFIAIH		P04745	P04745 [498-506]	1012.51	30.89	195341	10809.8
[Y].INQNLPWG.[Y]	INQNLPWG		P02765	P02765 [48-55]	941.484	33.03	193687	27751.8
[Y].LKNWGEGW.[G]	LKNWGEGW		P04745	P04745 [292-299]	989.484	30.14	193506	39541
[L].FILPDQDKME.[E]	FILPDQDKME		P01011	P01011 [276-285]	1235.6	29.76	193439	76928.7
[R].VATYLPAPEGLK.[F]	VATYLPAPEGLK		P24821	P24821 [708-719]	1258.7	28.95	193344	165645
[F].GSPSGQKDLLF.[K]	GSPSGQKDLLF		P02788	P02788 [309-319]	1148.59	29.87	193312	72079.7
[T].VLSGGTTMYPGIAD.[R]	VLSGGTTMYPGIAD		P60709	P60709 [298-311]	1381.67	31.33	192876	46604.1
[A].VVLPVPQPEIMEV.[P]	VVLPVPQPEIMEV	1xOxidation [M11]	P05814	P05814 [89-101]	1465.8	44.18	192330	53120.3
[F].DVYTESWAQDPSQENK.[K]	DVYTESWAQDPSQENK		P19835	P19835 [385-400]	1896.82	22.9	191201	191201
[A].IDIGQVEGA.[F]	IDIGQVEGA		P47989	P47989 [1191-1199]	901.463	24.98	191115	65257
[A].RSVNGKEDAIWN.[L]	RSVNGKEDAIWN		P02788	P02788 [277-288]	1388.69	18.29	190655	78776.1
[S].DVSVSDVPFPF.[S]	DVSVSDVPFPF		P15941	P15941 [1138-1148]	1208.58	47.5	190392	35158.8
[Q].DLNAPSDWDSRGKDSYETSQ.[L]	DLNAPSDWDSRGKDSYETSQ	2xPhospho [S10; S15]	P10451	P10451 [210-229]	2430.91	23.62	189852	73673
[S].TVFEDLSDEAERDEY.[E]	TVFEDLSDEAERDEY		P02788	P02788 [232-246]	1817.77	39.15	189443	146369
[W].IYGGAFLMGSGHGAN.[F]	IYGGAFLMGSGHGAN		P19835	P19835 [124-138]	1451.67	32.73	188229	188229
[H].DFENGEYWPR.[S]	DFENGEYWPR		P00751	P00751 [108-117]	1312.56	31.16	187658	81818.2
[Y].SLSSVVTVPSSSLGTQTY.[I]	SLSSVVTVPSSSLGTQTY		P01857	P01857 [64-81]	1812.92	40.59	187545	82761.8
[K].FLDDDITDDIM.[C]	FLDDDITDDIM		P00709	P00709 [99-109]	1312.56	45.58	186230	160063
[E].FDFIHDV.[N]	FDFIHDV		Q08431	Q08431 [169-175]	892.42	38.94	185884	92800.1
[N].SNWFPEGSKP.[F]	SNWFPEGSKP		P04745	P04745 [234-243]	1148.54	25.46	185870	75392.4
[R].RPDIQYPDATDEDIT.[S]	RPDIQYPDATDEDIT		P10451	P10451 [176-190]	1748.8	24.16	185660	124174
[I].SNSAEDPFIAIH.[A]	SNSAEDPFIAIH		P04745	P04745 [495-506]	1300.62	36.07	184806	34745
[C].LVQGFFPQEP.[L]	LVQGFFPQEP		P01876; P01877	P01876 [27-36]	1161.59	42.7	184616	149475
[I].LLNPQDKDGSFSVVIT.[G]	LLNPQDKDGSFSVVIT		P01833	P01833 [298-313]	1732.91	38.97	184267	177699
[R].VTTTRLDAPSQIEV.[K]	VTTTRLDAPSQIEV		P24821	P24821 [798-811]	1529.82	28.16	183379	164512
[-].EIVLTQSPGTLSLSPGER.[A]	EIVLTQSPGTLSLSPGER		P01620	P01620 [1-18]	1884.01	36.52	182810	138691
[D].HVDSQDSIDSNDSDDVDDTDDSHQSDESHH.[S]	HVDSQDSIDSNDSDDVDDTDDSHQSDESHH		P10451	P10451 [96-125]	3353.25	9.55	182422	74724
[W].KADSSPVKAGVETTTPSKQSNNK.[Y]	KADSSPVKAGVETTTPSKQSNNK		P0CG05	P0CG05 [43-65]	2374.22	8.75	182094	168655
[H].LLPPPSEELALNELVTLT.[C]	LLPPPSEELALNELVTLT		P01876; P01877	P01876 [232-249]	1949.08	48.24	181915	103491
[S].SQEPYFSYSGA.[F]	SQEPYFSYSGA		P02788	P02788 [204-214]	1235.52	25.6	181850	181850
[K].KGGSFQLNEL.[Q]	KGGSFQLNEL		P02788	P02788 [119-128]	1092.57	31.62	180852	151233
[A].DDVPGSNITGI.[C]	DDVPGSNITGI		P47989	P47989 [639-649]	1087.53	31.33	180243	39596.8
[K].DDPDAPLQPVTPL.[Q]	DDPDAPLQPVTPL		P0C0L4	P0C0L5 [1429-1441]	1377.69	38.99	179960	117163
[Y].ILTVPGHLDEM.[Q]	ILTVPGHLDEM	1xOxidation [M11]	P0C0L4	P0C0L5 [252-262]	1240.62	25.49	179756	120249
[L].TLGIETVGGVMT.[K]	TLGIETVGGVMT		P11021	P11021 [423-434]	1177.61	39.81	178838	21545.1
[Y].ANAADIDYIAGTNNMDGHI.[F]	ANAADIDYIAGTNNMDGHI		P19835	P19835 [325-343]	1975.88	36.14	178394	152783
[K].DSYVGDEAQS.[K]	DSYVGDEAQS		P60709	P60709 [51-60]	1070.43	13.36	177207	38983.8
[E].LHLPPDAPGGMVD.[F]	LHLPPDAPGGMVD		P47989	P47989 [494-506]	1318.65	28.43	176748	30676.4
[F].GPEEVNSVEGN.[S]	GPEEVNSVEGN		P01833	P01833 [24-34]	1130.5	14.24	176451	82945.6
[F].QDDFVIPDISEPGT.[W]	QDDFVIPDISEPGT		P0C0L4	P0C0L5 [199-212]	1532.71	44.39	175815	135370
[V].PVIDGDFIPADPIN.[L]	PVIDGDFIPADPIN		P19835	P19835 [309-322]	1482.75	44.33	175010	55591.7
[K].ANPTVTLFPPSSEELQAN.[K]	ANPTVTLFPPSSEELQAN		P0CG04	P0CG04 [5-22]	1914.94	43.2	172724	132529
[A].SPISDLNPV.[F]	SPISDLNPV		P47989	P47989 [356-364]	941.494	31.22	172693	28835.9
[A].AIIESPGGEMEE.[A]	AIIESPGGEMEE		P0C0L4	P0C0L5 [343-354]	1261.56	24.1	172505	172505
[A].NIIDEIIEK.[L]	NIIDEIIEK		P04114	P04114 [2200-2208]	1086.6	43.38	172329	29142.7
[K].TPVSDRVT.[K]	TPVSDRVT		P02768	P02768 [491-498]	874.463	9.35	172326	60591
[S].SNDDNPWIQ.[V]	SNDDNPWIQ		Q08431	Q08431 [121-129]	1088.46	26.32	171973	64937.3
[Y].LNIWVPQG.[R]	LNIWVPQG		P19835	P19835 [103-110]	926.509	41.59	170879	32000.4
[F].SLFDKDGDGTITT.[K]	SLFDKDGDGTITT		P62158	P62158 [18-30]	1369.65	25.69	170350	17395.4
[L].SWDIPEL.[V]	SWDIPEL		P01024	P01024 [192-198]	859.42	45.88	169832	148932
[E].HQDKIYPS.[F]	HQDKIYPS		P05814	P05814 [51-58]	987.489	9.21	169692	39009.1
[D].FKQETLPSKSNESHDHMDD.[M]	FKQETLPSKSNESHDHMDD	3xPhospho [S8; S10; S13]	P10451	P10451 [69-87]	2484.88	16.84	168080	94480.2
[L].IEFNMPVD.[L]	IEFNMPVD		P15291	P15291 [143-150]	964.444	38.38	168073	58748.7
[F].FDIAVDGEPLG.[R]	FDIAVDGEPLG		P62937	P62937 [8-18]	1132.55	42.83	167632	41076.1
[M].LDVMQDHF.[S]	LDVMQDHF		P10909	P10909 [173-180]	1004.45	29.58	167235	41104
[F].TTALDGPSGLV.[T]	TTALDGPSGLV		P24821	P24821 [1796-1806]	1030.54	31.66	167074	135333
[K].ALENPQPHPGWQGTL.[K]	ALENPQPHPGWQGTL		P19835	P19835 [61-75]	1644.81	28.17	166855	157160
[Q].GEDEHQDKIYPSF.[Q]	GEDEHQDKIYPSF		P05814	P05814 [47-59]	1564.69	24.03	165007	62160.9
[K].SPIFGPEEVNS.[V]	SPIFGPEEVNS		P01833	P01833 [20-30]	1175.56	28.62	164913	82438.3
[L].KFHPDTDDVPVPAPA.[G]	KFHPDTDDVPVPAPA		Q02818	Q02818 [421-435]	1605.79	22.77	164311	38299.4
[Q].ALGSLNDLQ.[F]	ALGSLNDLQ		P25311	P25311 [49-57]	930.489	26.76	164206	164206
[G].SPMYSIITPN.[I]	SPMYSIITPN		P01024	P01024 [23-32]	1122.55	34.38	163496	108611
[L].TLHMWPDTEGT.[F]	TLHMWPDTEGT		P00450	P00450 [684-694]	1287.57	30.41	161922	83428
[K].LVLSSEKTVLTPA.[T]	LVLSSEKTVLTPA		P01024	P01024 [67-79]	1357.79	29.19	161017	161017
[A].QPAVVLPVPQPEIM.[E]	QPAVVLPVPQPEIM	1xOxidation [M14]	P05814	P05814 [86-99]	1533.83	43.49	160248	108592
[L].AFSDGDQWTLS.[R]	AFSDGDQWTLS		P0C0L4	P0C0L5 [653-663]	1226.53	35.92	159914	136934
[F].SISNSAEDPFIAIHA.[E]	SISNSAEDPFIAIHA		P04745	P04745 [493-507]	1571.77	41.16	159563	22735
[K].KNADLQVLKPEPELV.[Y]	KNADLQVLKPEPELV		P01833	P01833 [231-245]	1692.95	33.17	159361	150428
[D].VSLEVSQGPGL.[L]	VSLEVSQGPGL		P01833	P01833 [123-133]	1085.58	32.31	159095	110476
[L].TGLRPGTE.[Y]	TGLRPGTE		P24821	P24821 [953-960]	830.437	9.18	158702	27983.1
[R].TSIVHLF.[E]	TSIVHLF		P04745	P04745 [26-32]	816.461	38.96	158128	27293.5
[E].TSTNTVPNTSPTA.[A]	TSTNTVPNTSPTA		P47989	P47989 [1067-1079]	1290.62	15.17	156949	79938.1
[F].SYPNPLPTGF.[T]	SYPNPLPTGF		Q99102	Q99102 [1134-1143]	1092.54	42.54	156936	41787.5
[E].FTPLDPTQEPIFPPEL.[L]	FTPLDPTQEPIFPPEL		P47989	P47989 [201-216]	1840.94	47.47	156121	41033.6
[R].ESTVFEDLSDEAER.[D]	ESTVFEDLSDEAER		P02788	P02788 [230-243]	1626.71	36.66	154828	7116.62
[F].RRPDIQYPDATDEDITSH.[M]	RRPDIQYPDATDEDITSH	2xPhospho [T11; S17]	P10451	P10451 [175-192]	2288.92	21.5	154153	71484.8
[R].DASGVTFTWTPSSGK.[S]	DASGVTFTWTPSSGK		P01876	P01876 [154-168]	1540.73	32.26	152858	152858
[R].GSFEFPVGDAVSKV.[L]	GSFEFPVGDAVSKV		P0C0L4	P0C0L5 [917-930]	1438.72	43.24	152795	124740
[R].TLEIPGNSDPNMIPDG.[D]	TLEIPGNSDPNMIPDG		P0C0L4	P0C0L5 [957-972]	1669.77	38.37	152698	80306.7
[W].NVEDLKEPPKNGIST.[K]	NVEDLKEPPKNGIST		P01024	P01024 [774-788]	1640.85	18.35	151751	151751
[S].PTIPFFDPQIPK.[L]	PTIPFFDPQIPK		P05814	P05814 [121-132]	1399.76	45.19	151636	112425
[L].QALEFHTVPF.[Q]	QALEFHTVPF		Q08380	Q08380 [379-388]	1188.6	42.93	150685	63754
[M].EEIENAFQGNL.[C]	EEIENAFQGNL		P47989	P47989 [137-147]	1263.59	36.62	150645	39653.7
[L].AFTQKTIDRLAGKPTHV.[N]	AFTQKTIDRLAGKPTHV		P01876	P01876 [323-339]	1883.05	20.07	149969	149969
[Q].GFFPQEP.[L]	GFFPQEP		P01876; P01877	P01876 [30-36]	821.383	34.48	149700	111940
[K].DGSFSVVIT.[G]	DGSFSVVIT		P01833	P01833 [305-313]	924.467	35.27	149312	107196
[K].GPSVFPLAPS.[S]	GPSVFPLAPS		P01857	P01857 [5-14]	971.52	39.72	149082	98243.8
[M].SLYPSLEDLKVDK.[V]	SLYPSLEDLKVDK	1xAcetyl [N-Term]	O00560	O00560 [2-14]	1548.82	43.41	148790	36475.6
[M].VLEAHDAQGDVPVTVTVHDFPG.[K]	VLEAHDAQGDVPVTVTVHDFPG		P01024	P01024 [43-64]	2303.13	35.44	148533	39469.6
[F].FDPQIPKLTD.[L]	FDPQIPKLTD		P05814	P05814 [126-135]	1173.62	33.97	147592	35981.8
[E].AERDEYE.[L]	AERDEYE		P02788	P02788 [241-247]	911.374	7.7	147266	26610.5
[Q].YVPFPPFSDIS.[N]	YVPFPPFSDIS		P47710	P47710 [158-168]	1268.62	46.91	146081	57412.5
[L].QNPSESSEPIPLE.[S]	QNPSESSEPIPLE		P47710	P47710 [28-40]	1426.67	26.17	145751	104478
[R].VGPLGFLSTGDANLPGN.[Y]	VGPLGFLSTGDANLPGN		P19835	P19835 [165-181]	1628.83	45.94	145604	145604
[F].NWYVDGVEVH.[N]	NWYVDGVEVH		P01857	P01857 [159-168]	1217.56	30.73	144759	93018.4
[F].QTPQHPSFLFQDK.[R]	QTPQHPSFLFQDK		Q08380	Q08380 [462-474]	1572.78	25.8	143769	95537
[E].LPREKYLT.[W]	LPREKYLT		P01876; P01877	P01876 [271-278]	1019.59	17.2	143651	143651
[Y].DFYPGKIDVH.[W]	DFYPGKIDVH		P25311	P25311 [229-238]	1190.58	23.48	143071	143071
[F].NVELIQPGAV.[K]	NVELIQPGAV		P01024	P01024 [1468-1477]	1039.58	34.01	142538	142538
[Q].DKDGSFSVVITGLRKEDAG.[R]	DKDGSFSVVITGLRKEDAG		P01833	P01833 [303-321]	1994.02	33.22	142465	54407.6
[Q].QGEDEHQDKIYPS.[F]	QGEDEHQDKIYPS		P05814	P05814 [46-58]	1545.68	14.27	141994	34603.4
[R].EFHSHEFH.[S]	EFHSHEFH	1xPhospho [S4]	P10451	P10451 [272-279]	1149.41	9.56	140951	25781.6
[R].IDSGLYLGSG.[Y]	IDSGLYLGSG		P02788	P02788 [333-342]	981.489	27.86	140126	140126
[Y].EKYLGPQYVAGIT.[N]	EKYLGPQYVAGIT		P02788	P02788 [679-691]	1438.76	30.72	139689	135072
[L].YASPDVSEPIDGLNPNEEEHRT.[Y]	YASPDVSEPIDGLNPNEEEHRT		P16671	P16671 [348-369]	2469.12	26.3	139386	81362.1
[L].LNPQDKDGSFSVVITGLRKEDAG.[R]	LNPQDKDGSFSVVITGLRKEDAG		P01833	P01833 [299-321]	2446.26	35.05	138808	74632.8
[L].QPLMQQVPQPIP.[Q]	QPLMQQVPQPIP		P05814	P05814 [147-158]	1375.74	37.26	138383	110780
[A].RPKLPLRYPER.[L]	RPKLPLRYPER		P47710	P47710 [16-26]	1424.85	17.61	138286	138286
[T].VLSGGTTMYPGIA.[D]	VLSGGTTMYPGIA		P60709	P60709 [298-310]	1266.64	32.74	138100	19728.7
[S].TKSPIFGPEEVNSV.[E]	TKSPIFGPEEVNSV		P01833	P01833 [18-31]	1503.77	31.22	137031	117434
[T].ASDPLDTLGSEGALSPGGVAS.[L]	ASDPLDTLGSEGALSPGGVAS		P0C0L4	P0C0L5 [982-1002]	1900.91	42.87	136901	64106
[N].TDGSGQVSIPIIIPQ.[T]	TDGSGQVSIPIIIPQ		P0C0L4	P0C0L5 [425-439]	1524.83	45.13	136579	71784.3
[M].FTTAPDQVDKEDEDFQESN.[K]	FTTAPDQVDKEDEDFQESN		P00450	P00450 [600-618]	2214.93	21.72	136106	136106
[Y].YDGKDYIEFN.[K]	YDGKDYIEFN		P25311	P25311 [139-148]	1263.55	26.68	135782	135782
[F].EGSESLWNKDPL.[T]	EGSESLWNKDPL		P22897	P22897 [214-225]	1374.65	35.25	134456	42929.1
[R].VPVAVQGEDTVQSLTQGDGVA.[K]	VPVAVQGEDTVQSLTQGDGVA		P01024	P01024 [387-407]	2070.03	40.44	133864	133864
[C].LISDFYPGAV.[T]	LISDFYPGAV		P0CG05; P0CG04	P0CG05 [29-38]	1081.56	43.28	133067	75250.2
[T].EVIPPLIE.[N]	EVIPPLIE		P04114	P04114 [951-958]	909.529	42.13	132118	25532.9
[T].IPFFDPQIP.[K]	IPFFDPQIP		P05814	P05814 [123-131]	1073.57	46.84	132015	118649
[K].AAPSVTLFPPSSEELQA.[N]	AAPSVTLFPPSSEELQA		P0CG05	P0CG05 [5-21]	1743.88	44.17	131926	124407
[Y].LISSIPLQGA.[F]	LISSIPLQGA		P12273	P12273 [72-81]	998.588	34.46	130839	130839
[D].SIDSNDSDDVDDTDDSHQSDESHH.[S]	SIDSNDSDDVDDTDDSHQSDESHH		P10451	P10451 [102-125]	2671.97	8.77	130550	51235.1
[Q].PAVVLPVPQPEIMEVPKA.[K]	PAVVLPVPQPEIMEVPKA	1xOxidation [M13]	P05814	P05814 [87-104]	1930.07	43.28	129972	52054.5
[W].SESGQGVTARNFPPSQDASGDLYTTSSQL.[T]	SESGQGVTARNFPPSQDASGDLYTTSSQL		P01876	P01876 [42-70]	3000.38	33.5	128962	109816
[K].YFKPGMPF.[D]	YFKPGMPF		P01024	P01024 [363-370]	986.48	36.94	128930	76899.3
[T].LNLVTRADEGW.[Y]	LNLVTRADEGW		P01833	P01833 [531-541]	1273.65	35.19	128293	75312.6
[S].TKSPIFGPEEVNSVEGNSVSIT.[C]	TKSPIFGPEEVNSVEGNSVSIT		P01833	P01833 [18-39]	2291.14	38.94	128145	128145
[V].SWNSGALTSGVHTFPA.[V]	SWNSGALTSGVHTFPA		P01857	P01857 [40-55]	1631.78	37.82	127722	127722
[R].DFNIPGFPT.[V]	DFNIPGFPT		O00391	O00391 [112-120]	1007.48	45.96	127225	15500.7
[T].LEIPGNSDPNMIPDG.[D]	LEIPGNSDPNMIPDG		P0C0L4	P0C0L5 [958-972]	1568.73	36.87	127048	72903.6
[L].LDSNSWIEEMPSE.[R]	LDSNSWIEEMPSE		P0C0L4	P0C0L5 [1703-1715]	1536.65	42.45	126084	69702.3
[Y].VPFPPFSDISNP.[T]	VPFPPFSDISNP		P47710	P47710 [159-170]	1316.65	45.4	125616	99825.4
[L].DEDIIAEENIVS.[R]	DEDIIAEENIVS		P01024	P01024 [752-763]	1346.63	35.12	125206	57423.9
[D].VSVSDVPFPF.[S]	VSVSDVPFPF		P15941	P15941 [1139-1148]	1093.56	47.1	125190	26311
[R].VPGDQTSTIIQELEPGVEY.[F]	VPGDQTSTIIQELEPGVEY		P24821	P24821 [670-688]	2075.02	45.81	124471	45413.1
[Y].PVTQPLAPVHNPISV.[-]	PVTQPLAPVHNPISV		P05814	P05814 [212-226]	1568.88	34.92	123153	56237.9
[L].SIEIPYS.[R]	SIEIPYS		P47989	P47989 [406-412]	808.409	29.68	122987	20096
[R].TLEIPGNSDPNMIPDG.[D]	TLEIPGNSDPNMIPDG	1xOxidation [M12]	P0C0L4	P0C0L5 [957-972]	1685.77	30.56	121855	72052.4
[L].IFDPNNYLPK.[E]	IFDPNNYLPK		P04114	P04114 [660-669]	1220.63	36.02	121484	27968.9
[Q].PLMQQVPQPIP.[Q]	PLMQQVPQPIP		P05814	P05814 [148-158]	1247.68	36.89	121316	52699.2
[D].LQVLKPEPELV.[Y]	LQVLKPEPELV		P01833	P01833 [235-245]	1264.75	35.57	120709	120709
[V].SVLPEGGETPL.[F]	SVLPEGGETPL		P06396	P06396 [378-388]	1098.57	32.39	120684	25536.9
[K].GPSVFPLAPSSK.[S]	GPSVFPLAPSSK		P01857	P01857 [5-16]	1186.65	29.59	120241	38725.7
[R].SVNGKEDAI.[W]	SVNGKEDAI		P02788	P02788 [278-286]	932.468	11.2	118309	38884.9
[E].DIIAEENIVS.[R]	DIIAEENIVS		P01024	P01024 [754-763]	1102.56	31.36	117928	91462.4
[A].AAIIESPGGEMEEAELT.[S]	AAIIESPGGEMEEAELT		P0C0L4	P0C0L5 [342-358]	1746.81	36.92	117180	93261.5
[F].VNEESTIPRSPTVVKGVAGGSVAV.[L]	VNEESTIPRSPTVVKGVAGGSVAV		P01833	P01833 [346-369]	2353.27	28.86	116144	60079.1
[K].LNMGITDLQ.[G]	LNMGITDLQ		P0C0L4	P0C0L5 [326-334]	1004.51	35.77	115388	59941.4
[K].WEMPFDPQDTHQ.[S]	WEMPFDPQDTHQ		P01011	P01011 [217-228]	1530.63	40.27	114839	41168.3
[L].ASSETGVGAPISGPGIPG.[R]	ASSETGVGAPISGPGIPG		P36222	P36222 [268-285]	1553.78	28.92	114759	114759
[F].SPKDVLVRW.[L]	SPKDVLVRW		P01876; P01877	P01876 [256-264]	1099.63	28.34	114699	94694.1
[K].VDNALQSGNSQESVTEQDSKDSTYSLSST.[L]	VDNALQSGNSQESVTEQDSKDSTYSLSST		P01834	P01834 [42-70]	3077.37	22.68	113937	113937
[C].LVQGFFPQEPLSVT.[W]	LVQGFFPQEPLSVT		P01876; P01877	P01876 [27-40]	1561.83	45.74	112034	112034
[L].GLQHWVPELA.[R]	GLQHWVPELA		Q08431	Q08431 [97-106]	1149.61	40.28	111772	29383.9
[K].TGDPNMGDSAVPTHWEPY.[T]	TGDPNMGDSAVPTHWEPY		P19835	P19835 [494-511]	1973.83	34.68	111138	85874.8
[T].LHMWPDTEGT.[F]	LHMWPDTEGT		P00450	P00450 [685-694]	1186.52	28.36	110858	35343.3
[Y].TEVDIGEL.[L]	TEVDIGEL		P06858	P06858 [395-402]	875.436	33.22	110539	31685.2
[Y].VIVPLKTGLQEVEVKAA.[V]	VIVPLKTGLQEVEVKAA		P01024	P01024 [899-915]	1794.07	37.73	110471	110471
[R].NDVVFQPI.[S]	NDVVFQPI		Q99102	Q99102 [2030-2037]	931.488	37.51	110083	14258
[K].VKHEDQQQGEDEHQD.[K]	VKHEDQQQGEDEHQD		P05814	P05814 [39-53]	1821.76	5.47	109980	23844.6
[L].QVLKPEPELVYEDLRGSVT.[F]	QVLKPEPELVYEDLRGSVT		P01833	P01833 [236-254]	2172.15	41.91	109560	99556.9
[R].ATGIPDRFSGSGSGTDFTLT.[I]	ATGIPDRFSGSGSGTDFTLT		P01620	P01620 [56-75]	1986.94	37.55	109390	109390
[L].YASPDVSEPIDGLNPNEEEH.[R]	YASPDVSEPIDGLNPNEEEH		P16671	P16671 [348-367]	2211.97	29.27	109097	28120.2
[K].DVTDTTALIT.[W]	DVTDTTALIT		P24821	P24821 [813-822]	1049.54	28.48	108010	28249.1
[L].SDETLPAPEFSPEPESGRA.[L]	SDETLPAPEFSPEPESGRA		P04217	P04217 [302-320]	2015.92	29.74	107964	34118.9
[K].ANPTVTLFPPSSEELQANK.[A]	ANPTVTLFPPSSEELQANK		P0CG04	P0CG04 [5-23]	2043.04	37.89	107928	107928
[-].YVLTQPPSVSVAPGETA.[R]	YVLTQPPSVSVAPGETA		P80748	P80748 [1-17]	1715.89	34.83	105663	69742
[V].KHEDQQQGEDEHQDK.[I]	KHEDQQQGEDEHQDK		P05814	P05814 [40-54]	1850.79	4.94	105221	26244.2
[Y].ANAADIDYI.[A]	ANAADIDYI		P19835	P19835 [325-333]	965.457	29.74	105128	65264.6
[M].VSGFGPIYN.[Y]	VSGFGPIYN		P04003	P04003 [250-258]	953.473	30.14	105034	39145.9
[F].TLASSETGVGAPISGPGIPG.[R]	TLASSETGVGAPISGPGIPG		P36222	P36222 [266-285]	1767.91	34.08	103804	91196.5
[L].NPTHQIYPVTQPLAPV.[H]	NPTHQIYPVTQPLAPV		P05814	P05814 [205-220]	1774.95	31.85	103565	63008.3
[E].WADNHLPL.[T]	WADNHLPL		O60664	O60664 [199-206]	965.484	31.9	103438	45419
[I].TLEVEPSDTIENV.[K]	TLEVEPSDTIENV		P62979	P62987 [14-26]	1445.7	33.63	103400	13351.1
[Y].FAHSILTV.[S]	FAHSILTV		P01871	P01871 [393-400]	887.499	30.97	102862	102862
[-].YVLTQPPSVSVAPG.[E]	YVLTQPPSVSVAPG		P80748	P80748 [1-14]	1414.76	33.42	102405	102405
[K].SGNTFRPEVHLLPPPSEE.[L]	SGNTFRPEVHLLPPPSEE		P01876; P01877	P01876 [222-239]	2006	33.23	102370	97184
[R].TLEIPGNSDPNM.[I]	TLEIPGNSDPNM		P0C0L4	P0C0L5 [957-968]	1287.59	28.68	102319	58232
[P].DIQYPDATDEDITSH.[M]	DIQYPDATDEDITSH	1xPhospho [T8]	P10451	P10451 [178-192]	1799.7	25.49	101069	40757
[I].KETSVEVEWDPL.[D]	KETSVEVEWDPL		P24821	P24821 [724-735]	1431.7	42.83	101066	46330.5
[R].MNENSHVQVPF.[Q]	MNENSHVQVPF	1xPhospho [S5]	P47710	P47710 [126-136]	1381.56	31.33	100548	31060.3
[F].TVILNQLTSRDAG.[F]	TVILNQLTSRDAG		P01833	P01833 [425-437]	1387.75	27.35	99505.6	99505.6
[D].QQQGEDEHQDKIYPSFQPQPL.[I]	QQQGEDEHQDKIYPSFQPQPL		P05814	P05814 [44-64]	2512.17	32.54	99364.6	46384.7
[E].DQQQGEDEHQDKIYPSFQPQP.[L]	DQQQGEDEHQDKIYPSFQPQP		P05814	P05814 [43-63]	2514.12	24.68	99214.1	68292.9
[Q].DIQQNTDGSGQVSIPIIIPQ.[T]	DIQQNTDGSGQVSIPIIIPQ		P0C0L4	P0C0L5 [420-439]	2123.1	45.48	98819.4	98819.4
[G].SQELPR.[E]	SQELPR		P01876; P01877	P01876 [268-273]	729.389	9.01	97095.3	28666.7
[R].IEVGRFPVLEGQ.[R]	IEVGRFPVLEGQ		O00391	O00391 [314-325]	1343.73	39.71	97033.5	19721.7
[R].TSIVHLFE.[W]	TSIVHLFE		P04745	P04745 [26-33]	945.504	38.4	96965.8	32656.3
[K].VDNALQSGNSQESVTEQDSKDSTYSLSSTL.[T]	VDNALQSGNSQESVTEQDSKDSTYSLSSTL		P01834	P01834 [42-71]	3190.45	33.29	96843.3	29010.7
[R].ESTVFEDLSDEAERDEY.[E]	ESTVFEDLSDEAERDEY		P02788	P02788 [230-246]	2033.85	43.67	96768.9	70319.6
[D].ETLPAPEFSPEPESGRA.[L]	ETLPAPEFSPEPESGRA		P04217	P04217 [304-320]	1813.86	28.91	96293	36217.8
[S].AEDPFIAIHAES.[K]	AEDPFIAIHAES		P04745	P04745 [498-509]	1299.62	32.31	96118.9	20691.5
[W].ASRQEPSQGTTTFAVTSI.[L]	ASRQEPSQGTTTFAVTSI		P01876; P01877	P01876 [280-297]	1880.93	30.77	95995.8	95995.8
[W].NSGALTSGVHTFPAVL.[Q]	NSGALTSGVHTFPAVL		P01857	P01857 [42-57]	1570.82	43.27	95477.2	43992.4
[I].LLNPQDKDGSFSV.[V]	LLNPQDKDGSFSV		P01833	P01833 [298-310]	1419.71	28.26	95315.5	95315.5
[A].LLLNQEL.[L]	LLLNQEL		P05814	P05814 [196-202]	842.498	38.86	94816.9	34537.7
[R].TDIVMDVGSSLNPA.[I]	TDIVMDVGSSLNPA		P47989	P47989 [1177-1190]	1418.68	41.99	94801.3	19823.4
[H].LLPPPSEELALNE.[L]	LLPPPSEELALNE		P01876; P01877	P01876 [232-244]	1421.75	39.02	94626.9	90616.4
[T].LEIPGNSDPNM.[I]	LEIPGNSDPNM		P0C0L4	P0C0L5 [958-968]	1186.54	26.8	94222.6	62806.7
[Y].LGPQYVAGI.[T]	LGPQYVAGI		P02788	P02788 [682-690]	917.509	33.29	94150.6	66892.8
[L].SFDVSLEVSQGPG.[L]	SFDVSLEVSQGPG		P01833	P01833 [120-132]	1321.63	36.18	93881.3	43571.6
[F].DPQIPK.[L]	DPQIPK		P05814	P05814 [127-132]	697.388	14.19	93792.9	18699.6
[Y].GIKDVPGDRTTIDLTEDENQY.[S]	GIKDVPGDRTTIDLTEDENQY		P24821	P24821 [838-858]	2379.13	28.1	93791	41405.2
[V].NLFETPV.[E]	NLFETPV		Q08431	Q08431 [194-200]	819.425	38.03	93445.1	61487.6
[V].SATVSSPGSVPEVQDIQQNTDGSGQVSIPIIIPQ.[T]	SATVSSPGSVPEVQDIQQNTDGSGQVSIPIIIPQ		P0C0L4	P0C0L5 [406-439]	3448.74	45.7	92373.9	92373.9
[K].IWDVVEKA.[D]	IWDVVEKA		P01024	P01024 [616-623]	959.52	26.89	92150.4	92150.4
[L].NEQFNWV.[S]	NEQFNWV		P10909	P10909 [363-369]	936.421	38.53	92100.4	48916.5
[W].QLFVNEESTIPRSPTV.[V]	QLFVNEESTIPRSPTV		P01833	P01833 [343-358]	1816.94	35.82	91828.5	91828.5
[S].SNDDNPWIQVN.[L]	SNDDNPWIQVN		Q08431	Q08431 [121-131]	1301.58	32.49	89798	18108.5
[S].FGFPDPQ.[S]	FGFPDPQ		Q96S86	Q96S86 [342-348]	807.367	30.65	89419	15534.4
[Q].YVPFPPFSDISN.[P]	YVPFPPFSDISN		P47710	P47710 [158-169]	1382.66	46.42	89345.1	20895.2
[V].KHEDQQQGEDEH.[Q]	KHEDQQQGEDEH		P05814	P05814 [40-51]	1479.61	5.44	89326.8	21390.7
[Y].ANAADIDYIAGTNNMDGH.[I]	ANAADIDYIAGTNNMDGH		P19835	P19835 [325-342]	1862.8	26.49	89014.2	64954.3
[R].EQEAEQMPE.[Y]	EQEAEQMPE		Q13410	Q13410 [82-90]	1090.44	14.84	88846.4	47918.9
[V].SLTLNLVT.[R]	SLTLNLVT		P01833	P01833 [528-535]	860.509	41.16	88729.3	88729.3
[M].QYVPFPPFSDISN.[P]	QYVPFPPFSDISN		P47710	P47710 [157-169]	1510.72	46.33	88402.8	19824.8
[K].TITLEVEPSDTIENVKA.[K]	TITLEVEPSDTIENVKA		P62979	P62987 [12-28]	1858.96	38.33	88156.6	17420.2
[Q].VQEADQVEEA.[H]	VQEADQVEEA		P24821	P24821 [1290-1299]	1117.5	14.5	88026.6	88026.6
[I].SDVSVSDVPFPF.[S]	SDVSVSDVPFPF		P15941	P15941 [1137-1148]	1295.62	46.92	87888.1	24101.7
[L].FLQTDQPIYNPGQ.[R]	FLQTDQPIYNPGQ		P0C0L4	P0C0L5 [142-154]	1520.74	29.25	87645.3	63507.5
[R].GSFEFPVGDA.[V]	GSFEFPVGDA		P0C0L4	P0C0L5 [917-926]	1025.46	40.06	87474.5	75077.8
[L].SAEASTGETPNLGEVVVA.[E]	SAEASTGETPNLGEVVVA		P24821	P24821 [1157-1174]	1730.84	35.59	87026.7	39432.2
[K].ANDESNEHSDVIDSQELSKVSR.[E]	ANDESNEHSDVIDSQELSKVSR	3xPhospho [S9; S14; S18]	P10451	P10451 [250-271]	2699.03	21.38	86961.1	70466.5
[L].QGSQELPR.[E]	QGSQELPR		P01876; P01877	P01876 [266-273]	914.469	8.94	86704.2	81299.1
[T].DLENLHLPLPL.[L]	DLENLHLPLPL		P05814	P05814 [135-145]	1273.72	47.39	86479.2	29636.9
[Y].LNWLPGSPSAEPG.[K]	LNWLPGSPSAEPG		P22897	P22897 [301-313]	1324.65	39.6	86477.6	29978.5
[A].RETIESLSSSEESIT.[E]	RETIESLSSSEESIT	1xPhospho [S9]	P05814	P05814 [16-30]	1747.76	27.35	86248.8	68482.9
[R].ESGVPDRFSGSGSGTDFTLT.[I]	ESGVPDRFSGSGSGTDFTLT		P06312	P06312 [81-100]	2016.91	33.68	85543.7	85543.7
[L].DIQGTGQLLFSV.[V]	DIQGTGQLLFSV		P01833	P01833 [194-205]	1277.67	46.59	85084.7	48778.9
[T].IPFFDPQIPK.[L]	IPFFDPQIPK		P05814	P05814 [123-132]	1201.66	43.8	84026.3	84026.3
[T].WEWNDVT.[L]	WEWNDVT		P36222	P36222 [69-75]	949.405	38.02	83215.5	37855.2
[Y].VSATVILHSGSDMVQAE.[R]	VSATVILHSGSDMVQAE		P01024	P01024 [326-342]	1743.86	32.62	82888.2	82888.2
[R].NFPPSQDASGDLYTTSSQLTLPAT.[Q]	NFPPSQDASGDLYTTSSQLTLPAT		P01876; P01877	P01876 [52-75]	2511.19	44.4	82036.9	70335.2
[K].NADLQVLKPEPELVYE.[D]	NADLQVLKPEPELVYE		P01833	P01833 [232-247]	1856.96	41.97	81895.7	56661.8
[K].DLLFKDSAIGF.[S]	DLLFKDSAIGF		P02788	P02788 [316-326]	1225.65	45.9	81626	43491.4
[L].SAEASTGETPNLGEVVV.[A]	SAEASTGETPNLGEVVV		P24821	P24821 [1157-1173]	1659.81	37.3	81533	28111.1
[L].RAEIVTEAEPEVDNL.[L]	RAEIVTEAEPEVDNL		P24821	P24821 [1612-1626]	1684.84	30.58	81429.2	42823
[M].VFVTNPDGSPAYRVPV.[A]	VFVTNPDGSPAYRVPV		P01024	P01024 [374-389]	1717.89	35.32	81426.6	81426.6
[Y].SLSSTLTLS.[K]	SLSSTLTLS		P01834	P01834 [66-74]	908.494	30.08	81303.5	56507.4
[F].GESAGGASVSLQTLSPY.[N]	GESAGGASVSLQTLSPY		P19835	P19835 [212-228]	1623.79	38.3	81210.8	81210.8
[G].SPMYSIITPNIL.[R]	SPMYSIITPNIL		P01024	P01024 [23-34]	1348.72	46.91	80386.9	67990.4
[L].NSNWFPEGSKP.[F]	NSNWFPEGSKP		P04745	P04745 [233-243]	1262.58	25.79	79968.1	50416.6
[L].DDDITDDIM.[C]	DDDITDDIM		P00709	P00709 [101-109]	1052.41	35.34	79579.1	79579.1
[W].KVDNALQSGNSQESVTEQDSKDSTYSLSSTLTLS.[K]	KVDNALQSGNSQESVTEQDSKDSTYSLSSTLTLS		P01834	P01834 [41-74]	3619.71	36.51	79177	79177
[E].TIESLSSSEESITE.[Y]	TIESLSSSEESITE	1xPhospho [S]	P05814	P05814 [18-31]	1591.66	30.38	79050.3	45492.9
[K].HEDQQQGEDEHQDK.[I]	HEDQQQGEDEHQDK		P05814	P05814 [41-54]	1722.7	5.28	79045.8	18635.5
[K].DVNDWVGPPNDNGVT.[K]	DVNDWVGPPNDNGVT		P04745	P04745 [368-382]	1598.71	31.71	78724.9	38086.9
[K].VKHEDQQQGED.[E]	VKHEDQQQGED		P05814	P05814 [39-49]	1312.58	4.89	78639.4	13519
[R].VPGDQTSTIIQEL.[E]	VPGDQTSTIIQEL		P24821	P24821 [670-682]	1400.73	43.21	78103	60013.6
[R].ESTVFEDLSDEAERDE.[Y]	ESTVFEDLSDEAERDE		P02788	P02788 [230-245]	1870.78	40.86	77950.8	77950.8
[R].SVNGKEDAIWNL.[L]	SVNGKEDAIWNL		P02788	P02788 [278-289]	1345.67	39.09	77841.7	48038.6
[L].AQDFLPDSI.[T]	AQDFLPDSI		P01871	P01871 [30-38]	1005.49	42.1	77730.7	71360.7
[V].KDYFPEPVTVS.[W]	KDYFPEPVTVS		P01857	P01857 [30-40]	1281.64	30.14	77442.5	63297.6
[Q].APGQGLEWM.[G]	APGQGLEWM		P01743	P01743 [59-67]	988.456	40.66	77082.5	68702.5
[Y].INQNLPW.[G]	INQNLPW		P02765	P02765 [48-54]	884.462	35.24	76988.3	14640.6
[L].SWDIPELVNMGQ.[W]	SWDIPELVNMGQ		P01024	P01024 [192-203]	1388.65	46.52	76082.3	68044.4
[K].DVFLGMFLYEYAR.[R]	DVFLGMFLYEYAR		P02768	P02768 [348-360]	1623.79	48.21	75100.7	6613.92
[Y].RVPVAVQGEDTVQSLTQGDGVAK.[L]	RVPVAVQGEDTVQSLTQGDGVAK		P01024	P01024 [386-408]	2354.23	30.16	74507.8	39981.6
[A].IIESPGGEMEEAELT.[S]	IIESPGGEMEEAELT		P0C0L4	P0C0L5 [344-358]	1604.74	31.82	74145.7	74145.7
[M].GFSSGDGYFENSPL.[M]	GFSSGDGYFENSPL		Q99102	Q99102 [1264-1277]	1476.63	42.49	72253.1	19691.3
[R].QEPSQGTTTFAVTSI.[L]	QEPSQGTTTFAVTSI		P01876; P01877	P01876 [283-297]	1566.76	36.61	72178.7	72178.7
[Y].LNIWVPQ.[G]	LNIWVPQ		P19835	P19835 [103-109]	869.488	42.09	71818.4	31975.8
[Q].APGQGLEWMG.[I]	APGQGLEWMG		P01743	P01743 [59-68]	1045.48	36.55	71754.6	53041.8
[Y].FNVELIQPG.[A]	FNVELIQPG		P01024	P01024 [1467-1475]	1016.54	40.28	71669.2	71669.2
[M].VNIENPEGIPVKQDSLSSQNQLGVLPL.[S]	VNIENPEGIPVKQDSLSSQNQLGVLPL		P01024	P01024 [165-191]	2888.54	45.67	70546.8	67118.2
[K].VKHEDQQQGEDEHQDKIYP.[S]	VKHEDQQQGEDEHQDKIYP		P05814	P05814 [39-57]	2323.06	14.08	69540.9	16523.9
[F].RPEVHLLPPPSEELA.[L]	RPEVHLLPPPSEELA		P01876; P01877	P01876 [227-241]	1683.91	32.23	68935.2	68935.2
[V].ATYLPAPEGL.[K]	ATYLPAPEGL		P24821	P24821 [709-718]	1031.54	38.38	68641.9	36130.2
[L].ARGFSPKDVLV.[R]	ARGFSPKDVLV		P01876; P01877	P01876 [252-262]	1188.67	27.45	68013.3	68013.3
[D].IQYPDATDEDIT.[S]	IQYPDATDEDIT		P10451	P10451 [179-190]	1380.62	24.8	67723.5	37639.2
[K].SGNTFRPEVHLLPPPSEELALNEL.[V]	SGNTFRPEVHLLPPPSEELALNEL		P01876; P01877	P01876 [222-245]	2659.37	45.39	66603.2	66603.2
[K].VDNALQSGNSQESVTEQDSKDSTY.[S]	VDNALQSGNSQESVTEQDSKDSTY		P01834	P01834 [42-65]	2602.14	19.26	66411	66411
[Y].TTENSGYLEITKKMGSSSM.[K]	TTENSGYLEITKKMGSSSM		P19835	P19835 [512-530]	2063.96	29.69	65984.1	65984.1
[Q].QGEDEHQDKIYPSFQPQ.[P]	QGEDEHQDKIYPSFQPQ		P05814	P05814 [46-62]	2045.92	22.4	65801.8	48543.7
[R].ESTVFEDL.[S]	ESTVFEDL		P02788	P02788 [230-237]	939.431	40.68	65748.1	38418.9
[P].AVVLPVPQPEIME.[V]	AVVLPVPQPEIME	1xOxidation [M12]	P05814	P05814 [88-100]	1437.77	42.57	65422.2	14352.4
[A].WTPSSNDDNPWIQVN.[L]	WTPSSNDDNPWIQVN		Q08431	Q08431 [117-131]	1772.79	42.04	65376.3	19042.2
[S].TIIQELEPGVE.[Y]	TIIQELEPGVE		P24821	P24821 [677-687]	1227.65	41.62	64525.5	24878.1
[F].GIQDGEQRISLPESL.[K]	GIQDGEQRISLPESL		P01024	P01024 [274-288]	1641.84	38.41	64511.4	44777.1
[L].LQLGIEE.[A]	LQLGIEE		P01011	P01011 [329-335]	801.435	29.43	64345.6	43365.1
[Q].DLNAPSDWDSRGKDSYE.[T]	DLNAPSDWDSRGKDSYE	1xPhospho [S6]	P10451	P10451 [210-226]	2034.81	23.1	64249.2	28183.2
[S].RATGIPDRFSGSGSGTDF.[T]	RATGIPDRFSGSGSGTDF		P01620	P01620 [55-72]	1827.86	24.7	63616.2	63616.2
[L].MQQVPQPIPQTL.[A]	MQQVPQPIPQTL		P05814	P05814 [150-161]	1379.74	35.54	63495.2	63495.2
[K].AVLDVFEEGTEAS.[A]	AVLDVFEEGTEAS		P01011	P01011 [361-373]	1366.64	42.37	63169.2	13235.1
[D].EHQDKIYPSFQPQ.[P]	EHQDKIYPSFQPQ		P05814	P05814 [50-62]	1616.77	21.59	63084.8	53282.8
[K].SLYKQIGLYPV.[L]	SLYKQIGLYPV		P01833	P01833 [164-174]	1280.72	40.62	62983.4	62983.4
[S].APFDVIGPPEPIL.[A]	APFDVIGPPEPIL		Q13410	Q13410 [27-39]	1364.75	47.13	62748	22844.5
[Y].VPFPPFSDIS.[N]	VPFPPFSDIS		P47710	P47710 [159-168]	1105.56	45.88	62617.1	62617.1
[Y].VGFVPVIDGDFIPADPI.[N]	VGFVPVIDGDFIPADPI		P19835	P19835 [305-321]	1770.93	48.37	61866.3	35868.9
[-].EVQLVESGGGLV.[Q]	EVQLVESGGGLV		P01766	P01766 [1-12]	1186.63	36.37	61756.8	40711.2
[L].AKADAAPDEK.[V]	AKADAAPDEK		P01833	P01833 [576-585]	1015.51	8.05	61135.9	9882.81
[K].GFDPMTPENGF.[W]	GFDPMTPENGF		Q13410	Q13410 [383-393]	1211.5	42.06	59537.2	19168.7
[V].VLPVPQPEIMEVPKA.[K]	VLPVPQPEIMEVPKA	1xOxidation [M10]	P05814	P05814 [90-104]	1662.91	34.79	59109.8	42251.5
[Y].TAVVPLVYGGET.[K]	TAVVPLVYGGET		P01591	P01591 [133-144]	1205.64	36.23	58313.7	58313.7
[K].FVDVTEVV.[R]	FVDVTEVV		P19440	P19440 [335-342]	907.477	38.93	58027.1	45696.4
[L].TVPGHLDEMQLDIQA.[R]	TVPGHLDEMQLDIQA		P0C0L4	P0C0L5 [254-268]	1666.81	38.89	57465.6	45000.5
[V].VLPVPQPEIME.[V]	VLPVPQPEIME		P05814	P05814 [90-100]	1251.67	41.87	57073.3	28078
[R].GFSPKDVLVRW.[L]	GFSPKDVLVRW		P01876; P01877	P01876 [254-264]	1303.72	43.21	56726.8	51490.1
[K].VQWKVDNALQSGNSQESVTEQDSKDSTYSLSST.[L]	VQWKVDNALQSGNSQESVTEQDSKDSTYSLSST		P01834	P01834 [38-70]	3618.67	31.6	56581.8	56581.8
[T].RLDAPSQIEVKDVTDTTA.[L]	RLDAPSQIEVKDVTDTTA		P24821	P24821 [802-819]	1959	25.12	56272.9	56272.9
[Y].LFIQTDKTIY.[T]	LFIQTDKTIY		P01024	P01024 [130-139]	1241.68	33.28	54540.7	30799.2
[L].LNPTHQIYPVTQPLAPV.[H]	LNPTHQIYPVTQPLAPV		P05814	P05814 [204-220]	1888.03	38.52	54531.1	27014
[G].DIVMTQSPDSLAVSLGER.[A]	DIVMTQSPDSLAVSLGER	1xOxidation [M4]	P06312	P06312 [21-38]	1933.95	42.55	54241.7	54241.7
[N].ALQSGNSQESVTEQ.[D]	ALQSGNSQESVTEQ		P01834	P01834 [45-58]	1477.68	13.97	54151	35349.1
[L].DIQGTGQLLFSVV.[I]	DIQGTGQLLFSVV		P01833	P01833 [194-206]	1376.74	47.53	53608.4	39959.8
[L].YASPDVSEPIDGL.[N]	YASPDVSEPIDGL		P16671	P16671 [348-360]	1362.64	37.39	53359.2	17226.4
[D].FKQETLPSKSNESHDHMDDM.[D]	FKQETLPSKSNESHDHMDDM	3xPhospho [S10; S13; S/T]	P10451	P10451 [69-88]	2615.92	19.97	51944.5	51944.5
[W].KVDNALQSGNSQESVTEQDSKDSTYSLSSTLTLSKAD.[Y]	KVDNALQSGNSQESVTEQDSKDSTYSLSSTLTLSKAD		P01834	P01834 [41-77]	3933.87	32.72	51341.3	51341.3
[L].LLNPTHQIYPVTQPL.[A]	LLNPTHQIYPVTQPL		P05814	P05814 [203-217]	1733.96	39.84	49632.1	28581.5
[R].WLQGSQELPREKYLT.[W]	WLQGSQELPREKYLT		P01876; P01877	P01876 [264-278]	1847.97	29.43	49015.7	49015.7
[A].RETIESLSSSEESITEYKQKVEK.[V]	RETIESLSSSEESITEYKQKVEK	1xPhospho [T/S]	P05814	P05814 [16-38]	2780.32	28.52	48926.2	48926.2
[K].EYVLPSFEVIVEPTEK.[F]	EYVLPSFEVIVEPTEK		P01024	P01024 [226-241]	1878.97	45.78	48741.2	48741.2
[R].IEVGRFPVLE.[G]	IEVGRFPVLE		O00391	O00391 [314-323]	1158.65	42.05	48371.7	11780.4
[A].LFILPDQDKMEE.[V]	LFILPDQDKMEE		P01011	P01011 [275-286]	1477.72	39.88	45887.7	21478.3
[L].LNPQDKDGSFSVVI.[T]	LNPQDKDGSFSVVI		P01833	P01833 [299-312]	1518.78	36.47	45698.8	45698.8
[K].LLQDEFPGIPSPL.[D]	LLQDEFPGIPSPL		P02790	P02790 [131-143]	1425.76	46.89	45466.7	33230.9
[I].SNSAEDPFIAIHAES.[K]	SNSAEDPFIAIHAES		P04745	P04745 [495-509]	1587.73	33.24	45452.2	24371
[Q].PEIMEVPK.[A]	PEIMEVPK	1xOxidation [M4]	P05814	P05814 [96-103]	958.491	39.03	45413.8	14219.4
[L].LDNWDSVTST.[F]	LDNWDSVTST		P02647	P02647 [71-80]	1137.51	25.48	45314.5	34733.5
[Q].YVPFPPFSDISNP.[T]	YVPFPPFSDISNP		P47710	P47710 [158-170]	1479.72	46.71	45188.9	39764.8
[F].DTGSSNLWVPSIH.[C]	DTGSSNLWVPSIH		P07339	P07339 [97-109]	1412.68	37.61	45025.3	18800
[R].QYLPNSHPPTVV.[R]	QYLPNSHPPTVV		P07498	P07498 [97-108]	1351.7	35.01	44553.3	44553.3
[R].NDVVFQPISGEDV.[R]	NDVVFQPISGEDV		Q99102	Q99102 [2030-2042]	1418.68	40.33	44379.3	18592.6
[Y].VAAAIIESPGGEMEEAELT.[S]	VAAAIIESPGGEMEEAELT		P0C0L4	P0C0L5 [340-358]	1916.92	41.02	43821.8	43821.8
[L].DEENLTQENQDR.[G]	DEENLTQENQDR	1xPhospho [T6]	P01011	P01011 [30-41]	1570.6	9.42	43220.5	22117.9
[N].LDEDIIAEENIVS.[R]	LDEDIIAEENIVS		P01024	P01024 [751-763]	1459.72	40.31	42747.3	42747.3
[R].ADAVTLDGGFIYEAGLAPY.[K]	ADAVTLDGGFIYEAGLAPY		P02788	P02788 [73-91]	1942.94	46.8	42658.3	28526.4
[L].VMGIPTFGRS.[F]	VMGIPTFGRS		P36222	P36222 [255-264]	1064.56	33.94	42642.9	37604.6
[I].RESTVFEDLSDEAERDEY.[E]	RESTVFEDLSDEAERDEY		P02788	P02788 [229-246]	2189.95	40.02	42325.3	30480.3
[L].KSPTIPFFDPQIPK.[L]	KSPTIPFFDPQIPK		P05814	P05814 [119-132]	1614.89	43.47	42217.1	29745.4
[K].VQWKVDNALQSGNSQESVTEQDSKDSTY.[S]	VQWKVDNALQSGNSQESVTEQDSKDSTY		P01834	P01834 [38-65]	3143.44	27	42066	42066
[R].GHGAGGASILTFWDA.[R]	GHGAGGASILTFWDA		P04745	P04745 [319-333]	1459.7	46.23	41738	14458.3
[R].TVDFTSPLFKPA.[T]	TVDFTSPLFKPA		Q99102	Q99102 [1091-1102]	1322.7	43.01	41373.9	33478.8
[L].LYFDSVPT.[S]	LYFDSVPT		P0C0L4	P0C0L5 [1524-1531]	941.461	35.23	40839.5	27827.8
[F].LDDDITDDIM.[C]	LDDDITDDIM	1xOxidation [M10]	P00709	P00709 [100-109]	1181.49	40.41	40577.7	40577.7
[K].LNMGITDL.[Q]	LNMGITDL		P0C0L4	P0C0L5 [326-333]	876.45	42.62	40364.8	30652.9
[R].ITYVPITGGTPSM.[V]	ITYVPITGGTPSM		P24821	P24821 [1742-1754]	1336.68	38.43	39875.8	13759.6
[V].AQDLNAPSDWDSRGKDSYETS.[Q]	AQDLNAPSDWDSRGKDSYETS	2xPhospho [S12; S17]	P10451	P10451 [208-228]	2501.95	22.49	39691.4	39691.4
[K].TTFDVYTESWAQDPSQENK.[K]	TTFDVYTESWAQDPSQENK		P19835	P19835 [382-400]	2245.99	35.58	39435.8	39435.8
[W].NLLRQAQEKFG.[K]	NLLRQAQEKFG		P02788	P02788 [288-298]	1303.71	25.4	39379.7	39379.7
[K].KVTEEDFYKLV.[S]	KVTEEDFYKLV		P19835	P19835 [358-368]	1370.72	36.47	38951.7	38951.7
[F].EDLSDEAERD.[E]	EDLSDEAERD		P02788	P02788 [235-244]	1178.48	13.25	38896.5	14616
[K].GDTFSCMVGHEALPL.[A]	GDTFSCMVGHEALPL		P01876; P01877	P01876 [308-322]	1576.71	34.69	38857.2	38857.2
[L].GKDLLLPQPDL.[R]	GKDLLLPQPDL		P02750	P02750 [228-238]	1208.69	40.66	38313.7	38313.7
[K].GGSFQLNEL.[Q]	GGSFQLNEL		P02788	P02788 [120-128]	964.473	38.91	38313	36943
[E].TYVPKE.[F]	TYVPKE		P02768	P02768 [520-525]	736.388	9.55	37879	12863.9
[A].FTVNFGDTEE.[A]	FTVNFGDTEE		P01009	P01009 [167-176]	1158.49	33.8	37865.3	17443.2
[K].ANPTVTLFPPSSEELQANKAT.[L]	ANPTVTLFPPSSEELQANKAT		P0CG04	P0CG04 [5-25]	2215.12	38.82	37788	35700.9
[L].KGDVSLKDIIDPA.[F]	KGDVSLKDIIDPA		Q01459	Q01459 [105-117]	1370.75	34.6	37570	17832.8
[R].RHPYFYAPELLFFAK.[R]	RHPYFYAPELLFFAK		P02768	P02768 [169-183]	1899	45.9	37569.4	25082.7
[L].IKDLDSQ.[T]	IKDLDSQ		P01011	P01011 [196-202]	818.425	9.22	37259.6	9565.99
[M].QQVPQPIPQTL.[A]	QQVPQPIPQTL		P05814	P05814 [151-161]	1248.69	31.32	37094.8	28616.6
[Y].MADLESALH.[Y]	MADLESALH		O00391	O00391 [301-309]	986.461	24.53	36873.7	36873.7
[R].EGTINVHDVETQF.[N]	EGTINVHDVETQF		P15941	P15941 [1109-1121]	1488.7	33.34	36652.2	12003.7
[L].MQQVPQPIPQTL.[A]	MQQVPQPIPQTL	1xOxidation [M1]	P05814	P05814 [150-161]	1395.73	31.6	36567.2	36567.2
[R].EGTINVHDVETQFNQY.[K]	EGTINVHDVETQFNQY		P15941	P15941 [1109-1124]	1893.86	37.61	36331.9	19091.1
[K].KQELSEAEQATRTMQALPY.[S]	KQELSEAEQATRTMQALPY		P01024	P01024 [428-446]	2194.08	34.77	36016.1	36016.1
[V].GFVPVIDGDFIPADPI.[N]	GFVPVIDGDFIPADPI		P19835	P19835 [306-321]	1671.86	47.94	35961.7	23533.8
[Y].WEVEVGDRTDW.[A]	WEVEVGDRTDW		Q13410	Q13410 [360-370]	1391.62	38.14	35930.5	10772.7
[S].MMTGFAPDTDDL.[K]	MMTGFAPDTDDL		P01024	P01024 [1407-1418]	1313.54	41.29	35427.1	35427.1
[Y].LVVYTPTHEGGLEM.[Q]	LVVYTPTHEGGLEM	1xOxidation [M14]	P24821	P24821 [653-666]	1561.76	35.72	35172	35172
[Y].FAGGDAGDAFDGFD.[F]	FAGGDAGDAFDGFD		P02679	P02679 [307-320]	1361.53	38.55	34304.8	23334.2
[I].FFLPDEGKLQ.[H]	FFLPDEGKLQ		P01009	P01009 [276-285]	1193.62	36.36	33623.3	15226.7
[M].YFEWSDGTPVT.[F]	YFEWSDGTPVT		P22897	P22897 [434-444]	1301.57	39.08	33603.8	14183.1
[L].YASPDVSEPIDGLNPNE.[E]	YASPDVSEPIDGLNPNE		P16671	P16671 [348-364]	1816.82	32.64	32100.8	22041.9
[K].YAASSYLSLTPEQ.[W]	YAASSYLSLTPEQ		P0CG05; P0CG04	P0CG05 [66-78]	1429.68	36.21	30853.7	30853.7
[E].IQDEVDEL.[L]	IQDEVDEL		P05067	P05067 [558-565]	960.452	24.85	30525	30525
[Q].VLKPEPELVYE.[D]	VLKPEPELVYE		P01833	P01833 [237-247]	1315.71	28.23	29454.3	29454.3
[K].SAVQGPPER.[D]	SAVQGPPER		P01876; P01877	P01876 [169-177]	940.485	8.59	29153.9	27657
[N].SWIEEMPSE.[R]	SWIEEMPSE		P0C0L4	P0C0L5 [1707-1715]	1107.47	35.7	29092.5	20215.1
[K].QLESNKIPELDM.[T]	QLESNKIPELDM		P07602	P07602 [153-164]	1416.7	34.39	28448.8	20338.5
[F].AVTSILRVAAEDWKKGDT.[F]	AVTSILRVAAEDWKKGDT		P01876; P01877	P01876 [293-310]	1960.05	39.38	28270.2	28270.2
[K].GRVMPVLKSPTIP.[F]	GRVMPVLKSPTIP		P05814	P05814 [112-124]	1394.82	30.85	28188.8	28188.8
[K].HEDQQQGEDEH.[Q]	HEDQQQGEDEH		P05814	P05814 [41-51]	1351.51	6.25	27139.1	6563.16
[I].MQYVPFPPFSDISNPT.[A]	MQYVPFPPFSDISNPT		P47710	P47710 [156-171]	1839.86	47.05	26667.7	18297.2
[V].AQDLNAPSDWDSRGKDSYETSQ.[L]	AQDLNAPSDWDSRGKDSYETSQ	2xPhospho [S12; S17]	P10451	P10451 [208-229]	2630.01	22.13	26545.8	26545.8
[R].IIVPLNNRENISDPTSPL.[R]	IIVPLNNRENISDPTSPL		P01591	P01591 [62-79]	1992.08	40.62	26270.8	26270.8
[I].FQDDFVIPDISEPGT.[W]	FQDDFVIPDISEPGT		P0C0L4	P0C0L5 [198-212]	1679.78	45.73	26235.5	26235.5
[K].AGVETTTPSKQSNN.[K]	AGVETTTPSKQSNN		P0CG05	P0CG05 [51-64]	1433.69	8.57	25518.7	22556.4
[S].SIFQDDF.[V]	SIFQDDF		P0C0L4	P0C0L5 [196-202]	871.383	41.54	25284.4	12483
[A].LFILPDQDK.[M]	LFILPDQDK		P01011	P01011 [275-283]	1088.6	33.1	25101.2	14199.1
[R].EFHSHEFHSHEDM.[L]	EFHSHEFHSHEDM	2xPhospho [S4; S9]; 1xOxidation [M13]	P10451	P10451 [272-284]	1844.58	9.09	24926.3	9809.94
[E].LPREKYLTW.[A]	LPREKYLTW		P01876; P01877	P01876 [271-279]	1205.67	29.79	24546.2	21437.1
[F].VTNPDGSPAYRVPVAVQGEDTVQSLTQGDGVAK.[L]	VTNPDGSPAYRVPVAVQGEDTVQSLTQGDGVAK		P01024	P01024 [376-408]	3355.68	40.98	24535.2	24535.2
[K].IIEGEPN.[L]	IIEGEPN		P01833	P01833 [457-463]	771.388	13.61	24085.7	17393.2
[R].QAPGQGLEWMG.[I]	QAPGQGLEWMG	1xOxidation [M10]	P01743	P01743 [58-68]	1189.53	36.41	23813.2	23813.2
[F].AVTSILRVAAEDW.[K]	AVTSILRVAAEDW		P01876; P01877	P01876 [293-305]	1430.76	46.06	23617.7	16341.9
[R].IRLDIQGTGQLLFSVVINQLR.[L]	IRLDIQGTGQLLFSVVINQLR		P01833	P01833 [191-211]	2383.38	48.63	21485.4	4408.85
[K].KVTEEDFYKLVSE.[F]	KVTEEDFYKLVSE		P19835	P19835 [358-370]	1586.79	36.75	21024.8	21024.8
[Q].AIVENNESTE.[Y]	AIVENNESTE		P00709	P00709 [59-68]	1105.5	10.52	20905.3	6488.76
[K].DFDFVPPVV.[R]	DFDFVPPVV		P01024	P01024 [1245-1253]	1034.52	46.9	20760	20760
[S].VFIFPPSDEQL.[K]	VFIFPPSDEQL		P01834	P01834 [7-17]	1291.66	46.92	20245.7	20245.7
[A].KWEMPFDPQ.[D]	KWEMPFDPQ		P01011	P01011 [216-224]	1177.53	40.21	20006.1	14472.6
[Q].GSQELPR.[E]	GSQELPR		P01876; P01877	P01876 [267-273]	786.41	9.49	19426.5	19426.5
[W].KADGSPVKAGVETTKPSKQSNN.[K]	KADGSPVKAGVETTKPSKQSNN		P0CG04	P0CG04 [43-64]	2243.16	5.42	19122.4	18766.6
[K].LGLLGDSVDIF.[K]	LGLLGDSVDIF		P19835	P19835 [40-50]	1148.62	48.23	17983.6	6800.06
[T].LEIPGNSDPNMIPDGD.[F]	LEIPGNSDPNMIPDGD		P0C0L4	P0C0L5 [958-973]	1683.75	36.26	17543.8	12261.1
[A].HGVQTESSTVTPTLPGETLT.[Y]	HGVQTESSTVTPTLPGETLT		P00450	P00450 [837-856]	2055.02	30.09	17398.3	17398.3
[K].QIGLYPVLVIDSSG.[Y]	QIGLYPVLVIDSSG		P01833	P01833 [168-181]	1460.8	46.81	16983	16983
[G].FVPVIDGDFIPADPI.[N]	FVPVIDGDFIPADPI		P19835	P19835 [307-321]	1614.84	47.61	16262	5612.1
[Y].KVPLAGLEYPMLH.[Y]	KVPLAGLEYPMLH		P19835	P19835 [291-303]	1467.8	40.83	15301.1	15301.1
[Y].RVPVAVQGEDTVQSLTQGDGVAKL.[S]	RVPVAVQGEDTVQSLTQGDGVAKL		P01024	P01024 [386-409]	2467.32	41.89	14666.7	14666.7
[T].LEIPGNSDPNMIPDGDF.[N]	LEIPGNSDPNMIPDGDF	1xOxidation [M11]	P0C0L4	P0C0L5 [958-974]	1846.82	42.28	14061.1	9488.51
[S].HVQVPFQQL.[N]	HVQVPFQQL		P47710	P47710 [131-139]	1095.59	32.85	12946.2	12946.2
[L].SKSGNTFRPEVH.[L]	SKSGNTFRPEVH		P01876	P01876 [220-231]	1358.68	9.93	11863.2	11403.1
[A].MKAEFNITLIHPKDLTA.[L]	MKAEFNITLIHPKDLTA	1xAcetyl [N-Term]	P15144	P15144 [229-245]	1984.06	10.88	10298	5325.69
[-].EVQLVESGGGLVQPGGSLR.[L]	EVQLVESGGGLVQPGGSLR		P01766	P01766 [1-19]	1882	33.37	8037.04	8037.04
[K].AGVETTTPSKQSNNKY.[A]	AGVETTTPSKQSNNKY		P0CG05	P0CG05 [51-66]	1724.84	9.63	7948.88	7948.88
[F].KQETLPSKSNESHDH.[M]	KQETLPSKSNESHDH	1xPhospho [S9]	P10451	P10451 [70-84]	1816.79	7.7	5716.75	4116.67
[Y].NLTISDVSVSDVPFPF.[S]	NLTISDVSVSDVPFPF		P15941	P15941 [1133-1148]	1736.87	48.22	5145.31	2623.46
[H].YVGFVPVIDGDFIPADPI.[N]	YVGFVPVIDGDFIPADPI		P19835	P19835 [304-321]	1933.99	48.59	2899.83	1525.8
[F].RNMNKEDEGEIT.[K]	RNMNKEDEGEIT		P24821	P24821 [747-758]	1435.65	5.8	1262.35	1262.35

## Sheet: S.Table3
Supplementary Table 3. MBPDB search results of the peptides identified from the undigested human milk samples
Peptide sequence identified in the samples	Peptide sequence in the database	Protein ID	Protein	% Alignment	Bioactive Function
DLENLHLP	LTDLENLHLP	P05814	Beta-casein	80	ACE-inhibitory
DLENLHLP	LENLHLP	P05814	Beta-casein	87.5	ACE-inhibitory
DLENLHLPL	LENLHLPLP	P05814	Beta-casein	88.89	ACE-inhibitory
DLENLHLPL	LTDLENLHLP	P05814	Beta-casein	80	ACE-inhibitory
DLENLHLPLP	LENLHLPLP	P05814	Beta-casein	90	ACE-inhibitory
DLENLHLPLP	ENLHLPLP	P05814	Beta-casein	80	ACE-inhibitory
DLENLHLPLP	LTDLENLHLP	P05814	Beta-casein	80	ACE-inhibitory
DLENLHLPLPL	LENLHLPLP	P05814	Beta-casein	81.82	ACE-inhibitory
DTVYTKGRVMP	TVYTKGRVMP	P05814	Beta-casein	90.91	ACE-inhibitory
EHQDKIYPSFQPQPLIYP	DKIYPSFQPQPLIYP	P05814	Beta-casein	83.33	ACE-inhibitory
ELLLNPTHQIYPVTQPLAPVHNPI	QELLLNPTHQIYPVTQPLAPVHNPISV	P05814	Beta-casein	88.89	Antimicrobial
ELLLNPTHQIYPVTQPLAPVHNPIS	QELLLNPTHQIYPVTQPLAPVHNPISV	P05814	Beta-casein	92.59	Antimicrobial
ELLLNPTHQIYPVTQPLAPVHNPISV	QELLLNPTHQIYPVTQPLAPVHNPISV	P05814	Beta-casein	96.3	Antimicrobial
EPIPYGFLP	EPIPYGFLP	P05814	Beta-casein	100	ACE-inhibitory
EPIPYGFLPQN	EPIPYGFLP	P05814	Beta-casein	81.82	ACE-inhibitory
ETIESLSSSEESITE	RETIESLSSSEESITEYK	P05814	Beta-casein	83.33	Increase cellular growth
ETIESLSSSEESITEY	RETIESLSSSEESITEYK	P05814	Beta-casein	88.89	Increase cellular growth
ETIESLSSSEESITEYK	RETIESLSSSEESITEYK	P05814	Beta-casein	94.44	Increase cellular growth
ETIESLSSSEESITEYKQ	RETIESLSSSEESITEYK	P05814	Beta-casein	94.44	Increase cellular growth
ETIESLSSSEESITEYKQK	RETIESLSSSEESITEYK	P05814	Beta-casein	89.47	Increase cellular growth
ETIESLSSSEESITEYKQKV	RETIESLSSSEESITEYK	P05814	Beta-casein	85	Increase cellular growth
ETIESLSSSEESITEYKQKVE	RETIESLSSSEESITEYK	P05814	Beta-casein	80.95	Increase cellular growth
GRVMPVLKSPTIPFFD	GRVMPVLKSPTIPFFDPQIP	P05814	Beta-casein	80	Immunomodulatory
GRVMPVLKSPTIPFFDPQ	GRVMPVLKSPTIPFFDPQIP	P05814	Beta-casein	90	Immunomodulatory
GRVMPVLKSPTIPFFDPQIP	GRVMPVLKSPTIPFFDPQIP	P05814	Beta-casein	100	Immunomodulatory
GRVMPVLKSPTIPFFDPQIPK	GRVMPVLKSPTIPFFDPQIP	P05814	Beta-casein	95.24	Immunomodulatory
HQIYPVTQPLAPVHNP	YPVTQPLAPVHNPIS	P05814	Beta-casein	81.25	Antimicrobial
HQIYPVTQPLAPVHNPIS	YPVTQPLAPVHNPIS	P05814	Beta-casein	83.33	Antimicrobial
IESLSSSEESITEYK	RETIESLSSSEESITEYK	P05814	Beta-casein	83.33	Increase cellular growth
IESLSSSEESITEYKQK	RETIESLSSSEESITEYK	P05814	Beta-casein	83.33	Increase cellular growth
IESLSSSEESITEYKQKV	RETIESLSSSEESITEYK	P05814	Beta-casein	83.33	Increase cellular growth
IPFFDPQIP	PFFDPQIP	P05814	Beta-casein	88.89	ACE-inhibitory
IPFFDPQIPK	PFFDPQIP	P05814	Beta-casein	80	ACE-inhibitory
IYPVTQPLAPVHNPISV	YPVTQPLAPVHNPIS	P05814	Beta-casein	88.24	Antimicrobial
LLLNPTHQIYPVTQPLAPVHNP	QELLLNPTHQIYPVTQPLAPVHNPISV	P05814	Beta-casein	81.48	Antimicrobial
LLLNPTHQIYPVTQPLAPVHNPIS	QELLLNPTHQIYPVTQPLAPVHNPISV	P05814	Beta-casein	88.89	Antimicrobial
LLLNPTHQIYPVTQPLAPVHNPISV	QELLLNPTHQIYPVTQPLAPVHNPISV	P05814	Beta-casein	92.59	Antimicrobial
LLLNQELLLNPTHQIYPVTQPLAPVHNPISV	QELLLNPTHQIYPVTQPLAPVHNPISV	P05814	Beta-casein	87.1	Antimicrobial
LLNPTHQIYPVTQPLAPVHNPIS	QELLLNPTHQIYPVTQPLAPVHNPISV	P05814	Beta-casein	85.19	Antimicrobial
LLNPTHQIYPVTQPLAPVHNPISV	QELLLNPTHQIYPVTQPLAPVHNPISV	P05814	Beta-casein	88.89	Antimicrobial
LLNQELLLNPTHQIYP	LLNQELLLNPTHQIYPV	P05814	Beta-casein	94.12	Antimicrobial
LLNQELLLNPTHQIYPV	LLNQELLLNPTHQIYPV	P05814	Beta-casein	100	Antimicrobial
LLNQELLLNPTHQIYPVTQPL	LLNQELLLNPTHQIYPV	P05814	Beta-casein	80.95	Antimicrobial
LLNQELLLNPTHQIYPVTQPLAPVHNPISV	QELLLNPTHQIYPVTQPLAPVHNPISV	P05814	Beta-casein	90	Antimicrobial
LNPTHQIYPVTQPLAPVHNPIS	QELLLNPTHQIYPVTQPLAPVHNPISV	P05814	Beta-casein	81.48	Antimicrobial
LNPTHQIYPVTQPLAPVHNPISV	QELLLNPTHQIYPVTQPLAPVHNPISV	P05814	Beta-casein	85.19	Antimicrobial
LNQELLLNPTHQIY	LLNQELLLNPTHQIYPV	P05814	Beta-casein	82.35	Antimicrobial
LNQELLLNPTHQIYP	LLNQELLLNPTHQIYPV	P05814	Beta-casein	88.24	Antimicrobial
LNQELLLNPTHQIYPV	LLNQELLLNPTHQIYPV	P05814	Beta-casein	94.12	Antimicrobial
LNQELLLNPTHQIYPVTQPL	LLNQELLLNPTHQIYPV	P05814	Beta-casein	80	Antimicrobial
LNQELLLNPTHQIYPVTQPLAPVHNP	QELLLNPTHQIYPVTQPLAPVHNPISV	P05814	Beta-casein	88.89	Antimicrobial
LNQELLLNPTHQIYPVTQPLAPVHNPIS	QELLLNPTHQIYPVTQPLAPVHNPISV	P05814	Beta-casein	92.86	Antimicrobial
LNQELLLNPTHQIYPVTQPLAPVHNPISV	QELLLNPTHQIYPVTQPLAPVHNPISV	P05814	Beta-casein	93.1	Antimicrobial
LPIPQQ	VLPIPQ	P05814	Beta-casein	83.33	ACE-inhibitory
LTDLENLHL	LTDLENLHLP	P05814	Beta-casein	90	ACE-inhibitory
LTDLENLHLP	LTDLENLHLP	P05814	Beta-casein	100	ACE-inhibitory
LTDLENLHLPL	LTDLENLHLP	P05814	Beta-casein	90.91	ACE-inhibitory
LTDLENLHLPLP	LTDLENLHLP	P05814	Beta-casein	83.33	ACE-inhibitory
MPVLKSPTIPFFDPQIP	GRVMPVLKSPTIPFFDPQIP	P05814	Beta-casein	85	Immunomodulatory
MPVLKSPTIPFFDPQIPK	GRVMPVLKSPTIPFFDPQIP	P05814	Beta-casein	85	Immunomodulatory
NNPYVP	NPYVPR	P07498	Kappa-casein	83.33	Antioxidant
NPTHQIYPVTQPLAPVHNPISV	QELLLNPTHQIYPVTQPLAPVHNPISV	P05814	Beta-casein	81.48	Antimicrobial
NQELLLNPTHQIYP	LLNQELLLNPTHQIYPV	P05814	Beta-casein	82.35	Antimicrobial
NQELLLNPTHQIYPV	LLNQELLLNPTHQIYPV	P05814	Beta-casein	88.24	Antimicrobial
NQELLLNPTHQIYPVT	LLNQELLLNPTHQIYPV	P05814	Beta-casein	88.24	Antimicrobial
NQELLLNPTHQIYPVTQ	LLNQELLLNPTHQIYPV	P05814	Beta-casein	88.24	Antimicrobial
NQELLLNPTHQIYPVTQP	LLNQELLLNPTHQIYPV	P05814	Beta-casein	83.33	Antimicrobial
NQELLLNPTHQIYPVTQPLAPVHN	QELLLNPTHQIYPVTQPLAPVHNPISV	P05814	Beta-casein	85.19	Antimicrobial
NQELLLNPTHQIYPVTQPLAPVHNP	QELLLNPTHQIYPVTQPLAPVHNPISV	P05814	Beta-casein	88.89	Antimicrobial
NQELLLNPTHQIYPVTQPLAPVHNPIS	QELLLNPTHQIYPVTQPLAPVHNPISV	P05814	Beta-casein	96.3	Antimicrobial
NQELLLNPTHQIYPVTQPLAPVHNPISV	QELLLNPTHQIYPVTQPLAPVHNPISV	P05814	Beta-casein	96.43	Antimicrobial
PQNILPL	PQNILP	P05814	Beta-casein	85.71	ACE-inhibitory
PQNILPL	LPQNILP	P05814	Beta-casein	85.71	ACE-inhibitory
PTIPFFDPQIPKLTD	SPTIPFFDPQIPK	P05814	Beta-casein	80	Increase cellular growth
PVLKSPTIPFFDPQIP	GRVMPVLKSPTIPFFDPQIP	P05814	Beta-casein	80	Immunomodulatory
PVLKSPTIPFFDPQIPK	GRVMPVLKSPTIPFFDPQIP	P05814	Beta-casein	80	Immunomodulatory
PVTQPLAPVHNP	YPVTQPLAPVHNPIS	P05814	Beta-casein	80	Antimicrobial
PVTQPLAPVHNPISV	YPVTQPLAPVHNPIS	P05814	Beta-casein	93.33	Antimicrobial
QALLLNQELLLNPTHQIYPV	LLNQELLLNPTHQIYPV	P05814	Beta-casein	85	Antimicrobial
QELLLNPTHQIYPV	LLNQELLLNPTHQIYPV	P05814	Beta-casein	82.35	Antimicrobial
QELLLNPTHQIYPVTQPLAPVHNPISV	QELLLNPTHQIYPVTQPLAPVHNPISV	P05814	Beta-casein	100	Antimicrobial
QIYPVTQPLAPVHNPISV	YPVTQPLAPVHNPIS	P05814	Beta-casein	83.33	Antimicrobial
QVPQPIPQ	QVPQPIP	P05814	Beta-casein	87.5	ACE-inhibitory
RETIESLSSSEESITEY	RETIESLSSSEESITEYK	P05814	Beta-casein	94.44	Increase cellular growth
RETIESLSSSEESITEYK	RETIESLSSSEESITEYK	P05814	Beta-casein	100	Increase cellular growth
RETIESLSSSEESITEYKQ	RETIESLSSSEESITEYK	P05814	Beta-casein	94.74	Increase cellular growth
RETIESLSSSEESITEYKQK	RETIESLSSSEESITEYK	P05814	Beta-casein	90	Increase cellular growth
RETIESLSSSEESITEYKQKV	RETIESLSSSEESITEYK	P05814	Beta-casein	85.71	Increase cellular growth
RETIESLSSSEESITEYKQKVE	RETIESLSSSEESITEYK	P05814	Beta-casein	81.82	Increase cellular growth
SFQPQPLIYP	YPSFQPQPLIYP	P05814	Beta-casein	83.33	ACE-inhibitory
SFQPQPLIYP	SFQPQPLIYP	P05814	Beta-casein	100	ACE-inhibitory
SFQPQPLIYP	QPQPLIYP	P05814	Beta-casein	80	ACE-inhibitory
SFQPQPLIYP	PSFQPQPLIYP	P05814	Beta-casein	90.91	ACE-inhibitory
SFQPQPLIYP	FQPQPLIYP	P05814	Beta-casein	90	ACE-inhibitory
SPTIPFFDPQI	SPTIPFFDPQIPK	P05814	Beta-casein	84.62	Increase cellular growth
SPTIPFFDPQIP	SPTIPFFDPQIPK	P05814	Beta-casein	92.31	Increase cellular growth
SPTIPFFDPQIPK	SPTIPFFDPQIPK	P05814	Beta-casein	100	Increase cellular growth
SPTIPFFDPQIPKL	SPTIPFFDPQIPK	P05814	Beta-casein	92.86	Increase cellular growth
SPTIPFFDPQIPKLT	SPTIPFFDPQIPK	P05814	Beta-casein	86.67	Increase cellular growth
SPTIPFFDPQIPKLTD	SPTIPFFDPQIPK	P05814	Beta-casein	81.25	Increase cellular growth
TDLENLHLPL	LENLHLPLP	P05814	Beta-casein	80	ACE-inhibitory
TDLENLHLPL	LTDLENLHLP	P05814	Beta-casein	90	ACE-inhibitory
TDLENLHLPLP	LENLHLPLP	P05814	Beta-casein	81.82	ACE-inhibitory
TDLENLHLPLP	LTDLENLHLP	P05814	Beta-casein	81.82	ACE-inhibitory
TIESLSSSEESITEY	RETIESLSSSEESITEYK	P05814	Beta-casein	83.33	Increase cellular growth
TIESLSSSEESITEYK	RETIESLSSSEESITEYK	P05814	Beta-casein	88.89	Increase cellular growth
TIESLSSSEESITEYKQKVE	RETIESLSSSEESITEYK	P05814	Beta-casein	80	Increase cellular growth
TIPFFDPQIP	PFFDPQIP	P05814	Beta-casein	80	ACE-inhibitory
TQPLAPVHNPISV	YPVTQPLAPVHNPIS	P05814	Beta-casein	80	Antimicrobial
VLKSPTIPFFDPQIP	SPTIPFFDPQIPK	P05814	Beta-casein	80	Increase cellular growth
VLKSPTIPFFDPQIPK	SPTIPFFDPQIPK	P05814	Beta-casein	81.25	Increase cellular growth
VMPVLKSPTIPFFDPQ	GRVMPVLKSPTIPFFDPQIP	P05814	Beta-casein	80	Immunomodulatory
VMPVLKSPTIPFFDPQIP	GRVMPVLKSPTIPFFDPQIP	P05814	Beta-casein	90	Immunomodulatory
VMPVLKSPTIPFFDPQIPK	GRVMPVLKSPTIPFFDPQIP	P05814	Beta-casein	90	Immunomodulatory
VMPVLKSPTIPFFDPQIPKLTD	GRVMPVLKSPTIPFFDPQIP	P05814	Beta-casein	81.82	Immunomodulatory
VTQPLAPVHNPISV	YPVTQPLAPVHNPIS	P05814	Beta-casein	86.67	Antimicrobial
YPSFQPQPLI	YPSFQPQPLIYP	P05814	Beta-casein	83.33	ACE-inhibitory
YPSFQPQPLI	SFQPQPLIYP	P05814	Beta-casein	80	ACE-inhibitory
YPSFQPQPLI	PSFQPQPLIYP	P05814	Beta-casein	81.82	ACE-inhibitory
YPVTQPLAPVHNPIS	YPVTQPLAPVHNPIS	P05814	Beta-casein	100	Antimicrobial
YPVTQPLAPVHNPISV	YPVTQPLAPVHNPIS	P05814	Beta-casein	93.75	Antimicrobial

## Sheet: S.Table4
Supplementary Table 4. MBPDB search results of the peptides identified from the digested human milk samples
Peptide sequence identified in the samples	Peptide sequence in the database	Protein ID	Protein	% Alignment	Bioactive Function
DKIYPSFQPQPL	DKIYPSFQPQPLIYP	P05814	Beta-casein	80	ACE-inhibitory
DLENLHLPLP	LENLHLPLP	P05814	Beta-casein	90	ACE-inhibitory
DLENLHLPLP	ENLHLPLP	P05814	Beta-casein	80	ACE-inhibitory
DLENLHLPLP	LTDLENLHLP	P05814	Beta-casein	80	ACE-inhibitory
DLENLHLPLPL	LENLHLPLP	P05814	Beta-casein	81.82	ACE-inhibitory
EHQDKIYPSFQPQPL	DKIYPSFQPQPLIYP	P05814	Beta-casein	80	ACE-inhibitory
ENLHLPL	NLHLPLP	P05814	Beta-casein	85.71	ACE-inhibitory
ENLHLPL	ENLHLPLP	P05814	Beta-casein	87.5	ACE-inhibitory
ENLHLPL	LENLHLP	P05814	Beta-casein	85.71	ACE-inhibitory
ENLHLPL	ENLHLP	P05814	Beta-casein	85.71	ACE-inhibitory
ENLHLPLP	NLHLPLP	P05814	Beta-casein	87.5	ACE-inhibitory
ENLHLPLP	LENLHLPLP	P05814	Beta-casein	88.89	ACE-inhibitory
ENLHLPLP	ENLHLPLP	P05814	Beta-casein	100	ACE-inhibitory
ENLHLPLPL	LENLHLPLP	P05814	Beta-casein	88.89	ACE-inhibitory
ENLHLPLPL	ENLHLPLP	P05814	Beta-casein	88.89	ACE-inhibitory
FFDPQIPK	PFFDPQIP	P05814	Beta-casein	87.5	ACE-inhibitory
FVEPIPY	FVEPIP	P05814	Beta-casein	85.71	ACE-inhibitory
HQDKIYPSFQPQPL	DKIYPSFQPQPLIYP	P05814	Beta-casein	80	ACE-inhibitory
IPFFDPQIP	PFFDPQIP	P05814	Beta-casein	88.89	ACE-inhibitory
IPFFDPQIPK	PFFDPQIP	P05814	Beta-casein	80	ACE-inhibitory
LENLHLPL	LENLHLPLP	P05814	Beta-casein	88.89	ACE-inhibitory
LENLHLPL	ENLHLPLP	P05814	Beta-casein	87.5	ACE-inhibitory
LENLHLPL	LENLHLP	P05814	Beta-casein	87.5	ACE-inhibitory
LENLHLPLP	LENLHLPLP	P05814	Beta-casein	100	ACE-inhibitory
LENLHLPLP	ENLHLPLP	P05814	Beta-casein	88.89	ACE-inhibitory
LENLHLPLPL	LENLHLPLP	P05814	Beta-casein	90	ACE-inhibitory
LENLHLPLPL	ENLHLPLP	P05814	Beta-casein	80	ACE-inhibitory
LPQNILP	PQNILP	P05814	Beta-casein	85.71	ACE-inhibitory
LPQNILP	LPQNILP	P05814	Beta-casein	100	ACE-inhibitory
LPQNILPL	LPQNILP	P05814	Beta-casein	87.5	ACE-inhibitory
NLHLPLP	NLHLPLP	P05814	Beta-casein	100	ACE-inhibitory
NLHLPLP	ENLHLPLP	P05814	Beta-casein	87.5	ACE-inhibitory
NLHLPLP	LHLPLP	P05814	Beta-casein	85.71	ACE-inhibitory
PFFDPQIPK	PFFDPQIP	P05814	Beta-casein	88.89	ACE-inhibitory
PFVEPIP	FVEPIP	P05814	Beta-casein	85.71	ACE-inhibitory
QDKIYPSFQPQPL	DKIYPSFQPQPLIYP	P05814	Beta-casein	80	ACE-inhibitory
QQVPQPI	QVPQPIP	P05814	Beta-casein	85.71	ACE-inhibitory
QQVPQPIP	QVPQPIP	P05814	Beta-casein	87.5	ACE-inhibitory
QVPQPIPQ	QVPQPIP	P05814	Beta-casein	87.5	ACE-inhibitory
TDLENLHLPLP	LENLHLPLP	P05814	Beta-casein	81.82	ACE-inhibitory
TDLENLHLPLP	LTDLENLHLP	P05814	Beta-casein	81.82	ACE-inhibitory
VPQPIPQ	VPQPIP	P05814	Beta-casein	85.71	ACE-inhibitory
VPQPIPQ	QVPQPIP	P05814	Beta-casein	85.71	ACE-inhibitory
IYPFVEPI	YPFVEPI	P05814	Beta-casein	87.5	Anticancer
PFVEPIP	YPFVEPI	P05814	Beta-casein	85.71	Anticancer
PVTQPLAPVHNPISV	YPVTQPLAPVHNPIS	P05814	Beta-casein	93.33	Antimicrobial
QVVPYP	QVVPYPQ	P05814	Beta-casein	85.71	Antioxidant
QVVPYPQ	QVVPYPQ	P05814	Beta-casein	100	Antioxidant
VVPYPQ	VPYPQ	P05814	Beta-casein	83.33	Antioxidant
VVPYPQ	QVVPYPQ	P05814	Beta-casein	85.71	Antioxidant
VVPYPQ	VPYPQ	P05814	Beta-casein	83.33	DPP-IV Inhibitory
FVEPIPY	VEPIPY	P05814	Beta-casein	85.71	Immunomodulatory
VEPIPYG	VEPIPY	P05814	Beta-casein	85.71	Immunomodulatory
IYPFVEPI	YPFVEPI	P05814	Beta-casein	87.5	Increase cellular growth
KSPTIPFFDPQIPK	SPTIPFFDPQIPK	P05814	Beta-casein	92.86	Increase cellular growth
PFVEPIP	YPFVEPI	P05814	Beta-casein	85.71	Increase cellular growth
PTIPFFDPQIPK	SPTIPFFDPQIPK	P05814	Beta-casein	92.31	Increase cellular growth
RETIESLSSSEESIT	RETIESLSSSEESITEYK	P05814	Beta-casein	83.33	Increase cellular growth
RETIESLSSSEESITE	RETIESLSSSEESITEYK	P05814	Beta-casein	88.89	Increase cellular growth
RETIESLSSSEESITEYK	RETIESLSSSEESITEYK	P05814	Beta-casein	100	Increase cellular growth
SPTIPFFDPQIPK	SPTIPFFDPQIPK	P05814	Beta-casein	100	Increase cellular growth
TIPFFDPQIPK	SPTIPFFDPQIPK	P05814	Beta-casein	84.62	Increase cellular growth
IYPFVEPI	YPFVEPI	P05814	Beta-casein	87.5	Opioid
PFVEPIP	YPFVEPI	P05814	Beta-casein	85.71	Opioid
